# Supplementary material
Source: publisher figshare collection journal article supplement (https://springernature.figshare.com/ndownloader/files/24108869)
Supplement: Supplementary file 1 [file 24108869]

																			Phylum:	Annelida	Annelida	Annelida	Annelida	Annelida	Annelida	Annelida	Annelida	Annelida	Annelida	Annelida	Annelida	Annelida	Annelida	Annelida	Arthropoda	Arthropoda	Arthropoda	Arthropoda	Arthropoda	Arthropoda	Arthropoda	Arthropoda	Arthropoda	Arthropoda	Arthropoda	Arthropoda	Arthropoda	Arthropoda	Arthropoda
																			Subphylum/Class/Subclass:	Hirudinea	Hirudinea	Hirudinea	Hirudinea	Hirudinea	Hirudinea	Hirudinea	Hirudinea	Oligochaeta	Oligochaeta	Oligochaeta	Oligochaeta	Oligochaeta	Oligochaeta	Oligochaeta	Arachnida	Crustacea	Crustacea	Crustacea	Crustacea	Crustacea	Crustacea	Crustacea	Crustacea	Crustacea	Crustacea	Crustacea	Crustacea	Crustacea	Crustacea
																			Subclass/Order:	Arhynchobdellida	Arhynchobdellida	Arhynchobdellida	n/a	Rhynchobdellida	Rhynchobdellida	Rhynchobdellida	Rhynchobdellida	Crassiclitellata	Haplotaxida	Haplotaxida	Haplotaxida	Haplotaxida	Lumbriculida	n/a	Acari	Amphipoda	Amphipoda	Amphipoda	Amphipoda	Amphipoda	Amphipoda	Amphipoda	Amphipoda	Amphipoda	Arguloida	Cladocera	Cladocera	Cladocera	Decapoda
																			Family/other:	Erpobdellidae	Erpobdellidae	Haemopidae	n/a	Glossiphoniidae	Glossiphoniidae�	Glossiphoniidae�	Piscicolidae	Lumbricidae	Enchytraeidae	Lumbricidae	Naididae	Tubificidae	Lumbriculidae	n/a	n/a	Corophiidae	Crangonyctidae	Crangonyctidae	Gammaridae	Gammaridae	Gammaridae	Gammaridae	Gammaridae	Gammaridae	Argulidae	Chydoridae	Cladocera	Daphniidae	Astacidae
HA	WFD River Waterbody Code	WFD River Waterbody Name	River Name	Station Code	Station Name	Local Authority	Altitude (m)	Station Typology	Latitude	Longitude	Channel Description	Recent Flood	Q Value Number	Kick Sample (mins)	Stone Wash Sample (mins)	Bankside Extension Pole (mins)	Fieldsheet Date	Year	Species/Genus/other:	Erpobdella	Trocheta bykowskii	Haemopis	Hirudinea indetetminate	Helobdella	Glossiphonia	Glossiphonia complanata	Piscicola	Lumbricidae indeterminate	Enchytraeidae indeterminate	Eiseniella	Naididae indeterminate	Tubificidae indeterminate	Lumbriculidae indeterminate	Oligochaeta	Acari indeterminate	Corophium	Crangonyx	Crangonyx pseudogracilis	Gammarus	Gammarus duebeni	Gammarus lacustris	Gammarus pulex	Gammarus tigrinus	Gammarus zaddachi	Argulus foliaceus	Chydoridae indeterminate	Cladocera indeterminate	Daphnia	Austropotamobius pallipes
1	IE_NW_01B010100	BUNADAOWEN_010	BUNADAOWEN	RS01B010100	Br. u/s Mourne Beg Confluence	Donegal County Council	148.37	River Type 13	54.7363972	-7.8743732	Intermediate		Q3	2	1		30/07/2007	2007																	Common
1	IE_NW_01B010100	BUNADAOWEN_010	BUNADAOWEN	RS01B010100	Br. u/s Mourne Beg Confluence	Donegal County Council	148.37	River Type 13	54.7363972	-7.8743732			Q3	2	1		26/07/2011	2011														Few			Few
1	IE_NW_01B010100	BUNADAOWEN_010	BUNADAOWEN	RS01B010100	Br. u/s Mourne Beg Confluence	Donegal County Council	148.37	River Type 13	54.7363972	-7.8743732			Q3	2	1		01/10/2013	2013										Few				Few			Few
1	IE_NW_01B010100	BUNADAOWEN_010	BUNADAOWEN	RS01B010100	Br. u/s Mourne Beg Confluence	Donegal County Council	148.37	River Type 13	54.7363972	-7.8743732	Riffle Glide Pool	No	Q2	5	2		23/08/2016	2016																	Few
1	IE_NW_01B010100	BUNADAOWEN_010	BUNADAOWEN	RS01B010100	Br. u/s Mourne Beg Confluence	Donegal County Council	148.37	River Type 13	54.7363972	-7.8743732	Intermediate		Q2-3	4	2		24/10/2017	2017														Single
1	IE_NW_01B020200	BURN DAURNETT_010	BURN DAURNETT	RS01B020010	Blackburn Br.	Donegal County Council	21.58	River Type 13	54.7758476	-7.8506777	Riffle Glide Pool		Q2-3	2	1		30/07/2007	2007														Few			Few
1	IE_NW_01B020200	BURN DAURNETT_010	BURN DAURNETT	RS01B020010	Blackburn Br.	Donegal County Council	21.58	River Type 13	54.7758476	-7.8506777			Q2-3	2	1		26/07/2011	2011														Few			Few
1	IE_NW_01B020200	BURN DAURNETT_010	BURN DAURNETT	RS01B020010	Blackburn Br.	Donegal County Council	21.58	River Type 13	54.7758476	-7.8506777			Q2-3	2	1		01/10/2013	2013														Few	Few		Few
1	IE_NW_01B020200	BURN DAURNETT_010	BURN DAURNETT	RS01B020010	Blackburn Br.	Donegal County Council	21.58	River Type 13	54.7758476	-7.8506777	Intermediate	No	Q2-3	2	1		23/08/2016	2016														Few			Few
1	IE_NW_01B020200	BURN DAURNETT_010	BURN DAURNETT	RS01B020200	Bridge N.W. of Daisy Hill	Donegal County Council	21.58	River Type 13	54.7923777	-7.7857374			Q3	2	1		26/07/2011	2011							Few			Few				Few			Few				Common
1	IE_NW_01B020200	BURN DAURNETT_010	BURN DAURNETT	RS01B020200	Bridge N.W. of Daisy Hill	Donegal County Council	21.58	River Type 13	54.7923777	-7.7857374			Q3	2			01/10/2013	2013							Few							Few			Few				Common
1	IE_NW_01B020200	BURN DAURNETT_010	BURN DAURNETT	RS01B020200	Bridge N.W. of Daisy Hill	Donegal County Council	21.58	River Type 13	54.7923777	-7.7857374	Riffle Glide Pool	No	Q3	3	1		24/08/2016	2016														Common			Few				Few
1	UKGBNI1NW010103062	CARRIGANS_010	CARRIGANS	RS01C010150	Bridge N. of Garshooey Lower	Donegal County Council	4.02	River Type 13	54.9779186	-7.4397086			Q3	2	1		28/07/2011	2011							Few					Few		Few							Common
1	UKGBNI1NW010103062	CARRIGANS_010	CARRIGANS	RS01C010150	Bridge N. of Garshooey Lower	Donegal County Council	4.02	River Type 13	54.9779186	-7.4397086			Q3	2			02/08/2013	2013														Few			Few				Few
1	UKGBNI1NW010103062	CARRIGANS_010	CARRIGANS	RS01C010150	Bridge N. of Garshooey Lower	Donegal County Council	4.02	River Type 13	54.9779186	-7.4397086	Riffle Glide Pool	No	Q4	3	1		31/08/2016	2016		Few					Few								Few						Dominant
1	UKGBNI1NW010103062	CARRIGANS_010	CARRIGANS	RS01C010200	Bridge at Carrigans	Donegal County Council	4.02	River Type 13	54.9509603	-7.42893			Q2-3	2	1		27/07/2011	2011														Few			Few				Numerous
1	UKGBNI1NW010103062	CARRIGANS_010	CARRIGANS	RS01C010200	Bridge at Carrigans	Donegal County Council	4.02	River Type 13	54.9509603	-7.42893			Q2-3	3	1		02/08/2013	2013														Few			Few				Few
1	UKGBNI1NW010103062	CARRIGANS_010	CARRIGANS	RS01C010200	Bridge at Carrigans	Donegal County Council	4.02	River Type 13	54.9509603	-7.42893	Intermediate		Q2-3	3	1		31/08/2016	2016																	Few				Common
1	IE_NW_01C030100	CUMMIRK_010	CUMMIRK	RS01C030100	CUMMIRK - Cummirk Bridge (Upper)	Donegal County Council	161.81	River Type 13	54.9048392	-8.0307692			Q3-4	2	1		19/07/2011	2011										Few							Common
1	IE_NW_01C030100	CUMMIRK_010	CUMMIRK	RS01C030100	CUMMIRK - Cummirk Bridge (Upper)	Donegal County Council	161.81	River Type 13	54.9048392	-8.0307692			Q3	3	1		08/08/2013	2013										Few				Few			Few				Few
1	IE_NW_01C030100	CUMMIRK_010	CUMMIRK	RS01C030100	CUMMIRK - Cummirk Bridge (Upper)	Donegal County Council	161.81	River Type 13	54.9048392	-8.0307692	Riffle Glide Pool	No	Q4	3	1		24/08/2016	2016														Few			Few				Few
1	IE_NW_01C030300	CUMMIRK_020	CUMMIRK	RS01C030200	Br Se of Kingarrow	Donegal County Council	116.03	River Type 12	54.895573	-8.0371711			Q3	2	1		08/08/2013	2013										Few				Few							Common
1	IE_NW_01C030300	CUMMIRK_020	CUMMIRK	RS01C030200	Br Se of Kingarrow	Donegal County Council	116.03	River Type 12	54.895573	-8.0371711	Riffle Glide Pool		Q4	2	1		24/08/2016	2016														Few			Few				Numerous
1	IE_NW_01C030300	CUMMIRK_020	CUMMIRK	RS01C030300	Cummirk Bridge (Lower)	Donegal County Council	116.03	River Type 12	54.8644667	-8.0073489			Q3	2	1		19/07/2011	2011																	Few				Common
1	IE_NW_01C030300	CUMMIRK_020	CUMMIRK	RS01C030300	Cummirk Bridge (Lower)	Donegal County Council	116.03	River Type 12	54.8644667	-8.0073489			Q3	2	1		08/08/2013	2013														Few	Few		Few
1	IE_NW_01C030300	CUMMIRK_020	CUMMIRK	RS01C030300	Cummirk Bridge (Lower)	Donegal County Council	116.03	River Type 12	54.8644667	-8.0073489	Intermediate	No	Q3	2	1		24/08/2016	2016																	Few				Numerous
1	IE_NW_01C040500	CROSS ROADS STREAM_010	CROSS ROADS STREAM	RS01C040200	CROSS ROADS STREAM - Br at Monellan Ho	Donegal County Council	15.45	River Type 33	54.7725953	-7.7071169			Q4	2	1		18/07/2011	2011												Few		Few			Few				Few
1	IE_NW_01C040500	CROSS ROADS STREAM_010	CROSS ROADS STREAM	RS01C040200	CROSS ROADS STREAM - Br at Monellan Ho	Donegal County Council	15.45	River Type 33	54.7725953	-7.7071169			Q4	2	1		01/10/2013	2013												Few									Common
1	IE_NW_01C040500	CROSS ROADS STREAM_010	CROSS ROADS STREAM	RS01C040200	CROSS ROADS STREAM - Br at Monellan Ho	Donegal County Council	15.45	River Type 33	54.7725953	-7.7071169	Riffle Glide Pool		Q4	3	1		26/08/2016	2016														Few			Few				Common
1	IE_NW_01C040500	CROSS ROADS STREAM_010	CROSS ROADS STREAM	RS01C040500	0.2 km d/s Br at Cross Roads	Donegal County Council	15.45	River Type 33	54.7868942	-7.6880443			Q3	2	1		18/07/2011	2011														Few							Common
1	IE_NW_01C040500	CROSS ROADS STREAM_010	CROSS ROADS STREAM	RS01C040500	0.2 km d/s Br at Cross Roads	Donegal County Council	15.45	River Type 33	54.7868942	-7.6880443			Q4	2	2		01/10/2013	2013												Few									Numerous
1	IE_NW_01C040500	CROSS ROADS STREAM_010	CROSS ROADS STREAM	RS01C040500	0.2 km d/s Br at Cross Roads	Donegal County Council	15.45	River Type 33	54.7868942	-7.6880443	Intermediate		Q2-3	3	1		26/08/2016	2016							Few														Common
1	IE_NW_01C050400	CLOGHROE_010	CLOGHROE	RS01C050200	CLOGHROE - Cloghroe Bridge	Donegal County Council	70.91	River Type 23	54.8476575	-7.7798772			Q4	2	1		20/07/2011	2011							Few			Few		Few		Few			Few				Common
1	IE_NW_01C050400	CLOGHROE_010	CLOGHROE	RS01C050200	CLOGHROE - Cloghroe Bridge	Donegal County Council	70.91	River Type 23	54.8476575	-7.7798772			Q4	2	2		01/10/2013	2013		Few										Few		Few			Few				Few
1	IE_NW_01C050400	CLOGHROE_010	CLOGHROE	RS01C050200	CLOGHROE - Cloghroe Bridge	Donegal County Council	70.91	River Type 23	54.8476575	-7.7798772	Riffle Glide Pool		Q3-4	3	1		30/08/2016	2016														Few							Common
1	IE_NW_01C050400	CLOGHROE_010	CLOGHROE	RS01C050400	Br d/s Callan Br	Donegal County Council	70.91	River Type 23	54.8495089	-7.7452015			Q4	2	1		20/07/2011	2011							Few			Few		Few		Few							Common
1	IE_NW_01C050400	CLOGHROE_010	CLOGHROE	RS01C050400	Br d/s Callan Br	Donegal County Council	70.91	River Type 23	54.8495089	-7.7452015			Q4	2	2		01/10/2013	2013										Few		Common									Numerous
1	IE_NW_01C050400	CLOGHROE_010	CLOGHROE	RS01C050400	Br d/s Callan Br	Donegal County Council	70.91	River Type 23	54.8495089	-7.7452015	Riffle Glide Pool	No	Q3-4	3	1		30/08/2016	2016														Few			Few				Dominant
1	IE_NW_01C060100	CLOGHER (FINN)_010	CLOGHER (FINN)	RS01C060050	Br Sw Letterkillew	Donegal County Council	86.24	River Type 14	54.794521	-7.9815607			Q4	4	2		07/08/2013	2013										Few							Few				Few
1	IE_NW_01C060100	CLOGHER (FINN)_010	CLOGHER (FINN)	RS01C060050	Br Sw Letterkillew	Donegal County Council	86.24	River Type 14	54.794521	-7.9815607	Riffle Glide Pool	No	Q3	3	1		29/08/2016	2016										Few		Few		Few	Few		Few				Few
1	IE_NW_01C060100	CLOGHER (FINN)_010	CLOGHER (FINN)	RS01C060100	Br. N.E of Letterkillew	Donegal County Council	86.24	River Type 14	54.8009299	-7.9732055			Q3	3			28/07/2011	2011										Few		Few					Few
1	IE_NW_01C060100	CLOGHER (FINN)_010	CLOGHER (FINN)	RS01C060100	Br. N.E of Letterkillew	Donegal County Council	86.24	River Type 14	54.8009299	-7.9732055			Q4	6	4		07/08/2013	2013															Few
1	IE_NW_01C060100	CLOGHER (FINN)_010	CLOGHER (FINN)	RS01C060100	Br. N.E of Letterkillew	Donegal County Council	86.24	River Type 14	54.8009299	-7.9732055	Riffle Glide Pool	No	Q4	3	1		29/08/2016	2016														Few			Common
1	IE_NW_01C060100	CLOGHER (FINN)_010	Clogher Burn South Trib	RS01C870050	0.1�km u/s Clogher River conf.	Donegal County Council	86.24	River Type 14	54.7945475	-7.9771036			Q3-4	4			13/05/2008	2008														Few	Few		Common
1	IE_NW_01C060100	CLOGHER (FINN)_010	Clogher Burn South Trib	RS01C870050	0.1�km u/s Clogher River conf.	Donegal County Council	86.24	River Type 14	54.7945475	-7.9771036			Q3-4	3	2		07/08/2013	2013														Few
1	IE_NW_01D010040	DEELE (DONEGAL)_010	DEELE (DONEGAL)	RS01D010040	Bridge N. of Aughkeely	Donegal County Council	144.23	River Type 13	54.8730483	-7.8073029			Q4	2	1		20/07/2011	2011							Few			Few		Few		Few			Few				Few
1	IE_NW_01D010040	DEELE (DONEGAL)_010	DEELE (DONEGAL)	RS01D010040	Bridge N. of Aughkeely	Donegal County Council	144.23	River Type 13	54.8730483	-7.8073029			Q4	2	2		02/10/2013	2013							Few					Few		Few							Few
1	IE_NW_01D010040	DEELE (DONEGAL)_010	DEELE (DONEGAL)	RS01D010040	Bridge N. of Aughkeely	Donegal County Council	144.23	River Type 13	54.8730483	-7.8073029	Intermediate		Q3	4	1		30/08/2016	2016														Few
1	IE_NW_01D010040	DEELE (DONEGAL)_010	DEELE (DONEGAL)	RS01D010040	Bridge N. of Aughkeely	Donegal County Council	144.23	River Type 13	54.8730483	-7.8073029	Riffle Glide Pool	Yes	Q3	6	2		22/08/2018	2018															Single
1	IE_NW_01D010200	DEELE (DONEGAL)_020	DEELE (DONEGAL)	RS01D010200	2nd Br d/s Br near Newtown	Donegal County Council	76.3	River Type 23	54.8602525	-7.7463819	Intermediate		Q4	3	1		02/08/2007	2007						Few						Few		Few			Few					Common
1	IE_NW_01D010200	DEELE (DONEGAL)_020	DEELE (DONEGAL)	RS01D010200	2nd Br d/s Br near Newtown	Donegal County Council	76.3	River Type 23	54.8602525	-7.7463819			Q4	2	1		20/07/2011	2011							Few					Few		Few			Few				Common
1	IE_NW_01D010200	DEELE (DONEGAL)_020	DEELE (DONEGAL)	RS01D010200	2nd Br d/s Br near Newtown	Donegal County Council	76.3	River Type 23	54.8602525	-7.7463819			Q4	4			02/10/2013	2013						Few	Few					Few		Few			Few				Numerous
1	IE_NW_01D010200	DEELE (DONEGAL)_020	DEELE (DONEGAL)	RS01D010200	2nd Br d/s Br near Newtown	Donegal County Council	76.3	River Type 23	54.8602525	-7.7463819	Riffle Glide Pool	No	Q3	4	1		30/08/2016	2016												Few	Few	Few
1	IE_NW_01D010500	DEELE (DONEGAL)_030	DEELE (DONEGAL)	RS01D010412	125 metres d/s Convoy WWTP	Donegal County Council	18.72	River Type 32	54.857811	-7.6511271	Riffle Glide Pool	No	Q2-3	2	1		10/09/2014	2014		Single					Single		Single					Dominant
1	IE_NW_01D010500	DEELE (DONEGAL)_030	DEELE (DONEGAL)	RS01D010412	125 metres d/s Convoy WWTP	Donegal County Council	18.72	River Type 32	54.857811	-7.6511271	Riffle Glide Pool		Q2-3	3	1		30/08/2016	2016														Common							Common
1	IE_NW_01D010500	DEELE (DONEGAL)_030	DEELE (DONEGAL)	RS01D010500	Bridge 1.5 km S.E. of Convoy	Donegal County Council	18.72	River Type 32	54.8514075	-7.6405243			Q4	2	1		20/07/2011	2011							Few							Few							Few
1	IE_NW_01D010500	DEELE (DONEGAL)_030	DEELE (DONEGAL)	RS01D010500	Bridge 1.5 km S.E. of Convoy	Donegal County Council	18.72	River Type 32	54.8514075	-7.6405243			Q4	2	2		02/10/2013	2013							Few					Few			Few						Common
1	IE_NW_01D010500	DEELE (DONEGAL)_030	DEELE (DONEGAL)	RS01D010500	Bridge 1.5 km S.E. of Convoy	Donegal County Council	18.72	River Type 32	54.8514075	-7.6405243	Riffle Glide Pool		Q3	4	1		30/08/2016	2016										Few		Few		Few			Few				Few
1	IE_NW_01D010600	DEELE (DONEGAL)_040	DEELE (DONEGAL)	RS01D010600	DEELE (DONEGAL) - Ballymonaster Bridge	Donegal County Council	7.98	River Type 32	54.8383585	-7.5756471			Q4	2	1		20/07/2011	2011							Few			Few				Few			Few				Common
1	IE_NW_01D010600	DEELE (DONEGAL)_040	DEELE (DONEGAL)	RS01D010600	DEELE (DONEGAL) - Ballymonaster Bridge	Donegal County Council	7.98	River Type 32	54.8383585	-7.5756471			Q4			5	02/10/2013	2013														Few	Few		Few				Numerous
1	IE_NW_01D010600	DEELE (DONEGAL)_040	DEELE (DONEGAL)	RS01D010600	DEELE (DONEGAL) - Ballymonaster Bridge	Donegal County Council	7.98	River Type 32	54.8383585	-7.5756471	Riffle Glide Pool		Q4	4	1		30/08/2016	2016		Few												Few			Few				Common
1	IE_NW_01E020100	ELATAGH_010	ELATAGH	RS01E020100	ELATAGH - Br N of Stranabrack Lr	Donegal County Council	141.67	River Type 13	54.8872422	-7.9569215			Q3	2	1		28/07/2011	2011														Few			Few
1	IE_NW_01E020100	ELATAGH_010	ELATAGH	RS01E020100	ELATAGH - Br N of Stranabrack Lr	Donegal County Council	141.67	River Type 13	54.8872422	-7.9569215			Q3	4	2		08/08/2013	2013														Few			Few
1	IE_NW_01E020100	ELATAGH_010	ELATAGH	RS01E020100	ELATAGH - Br N of Stranabrack Lr	Donegal County Council	141.67	River Type 13	54.8872422	-7.9569215	Riffle Glide Pool		Q3	3.5	1		29/08/2016	2016														Few
1	IE_NW_01E020300	ELATAGH_020	ELATAGH	RS01E020300	Elatagh Bridge	Donegal County Council	98.83	River Type 12	54.8586756	-7.9694461			Q3	3	1		28/07/2011	2011																	Few
1	IE_NW_01E020300	ELATAGH_020	ELATAGH	RS01E020300	Elatagh Bridge	Donegal County Council	98.83	River Type 12	54.8586756	-7.9694461			Q3-4	3	1		29/07/2013	2013																	Few
1	IE_NW_01E020300	ELATAGH_020	ELATAGH	RS01E020300	Elatagh Bridge	Donegal County Council	98.83	River Type 12	54.8586756	-7.9694461	Intermediate	No	Q3	5	2		29/08/2016	2016																	Few				Few
1	IE_NW_01F010200	FINN (DONEGAL)_010	FINN (DONEGAL)	RS01F010200	Bridge S. of Bellanamore	Donegal County Council	123.64	River Type 24	54.8676859	-8.0573825	Riffle Glide Pool		Q4	2	1		31/07/2007	2007										Few		Few					Few					Few
1	IE_NW_01F010200	FINN (DONEGAL)_010	FINN (DONEGAL)	RS01F010200	Bridge S. of Bellanamore	Donegal County Council	123.64	River Type 24	54.8676859	-8.0573825			Q4			4	19/07/2011	2011										Few		Few		Few			Few				Few
1	IE_NW_01F010200	FINN (DONEGAL)_010	FINN (DONEGAL)	RS01F010200	Bridge S. of Bellanamore	Donegal County Council	123.64	River Type 24	54.8676859	-8.0573825			Q3-4	6			08/08/2013	2013														Few	Few		Few				Few
1	IE_NW_01F010200	FINN (DONEGAL)_010	FINN (DONEGAL)	RS01F010200	Bridge S. of Bellanamore	Donegal County Council	123.64	River Type 24	54.8676859	-8.0573825	Riffle Glide Pool	No	Q4	3	1		24/08/2016	2016										Few		Few			Few		Few				Common
1	IE_NW_01F010350	FINN (DONEGAL)_020	FINN (DONEGAL)	RS01F010350	Br 100 m u/s Elatagh R confl	Donegal County Council	93.47	River Type 13	54.8569702	-7.9681072	Intermediate		Q4	2	1		31/07/2007	2007										Few				Few	Few		Few					Common
1	IE_NW_01F010350	FINN (DONEGAL)_020	FINN (DONEGAL)	RS01F010350	Br 100 m u/s Elatagh R confl	Donegal County Council	93.47	River Type 13	54.8569702	-7.9681072			Q4	2	1		19/07/2011	2011										Few				Few			Few				Common
1	IE_NW_01F010350	FINN (DONEGAL)_020	FINN (DONEGAL)	RS01F010350	Br 100 m u/s Elatagh R confl	Donegal County Council	93.47	River Type 13	54.8569702	-7.9681072			Q3-4	2	2		01/10/2013	2013										Few		Few		Few
1	IE_NW_01F010350	FINN (DONEGAL)_020	FINN (DONEGAL)	RS01F010350	Br 100 m u/s Elatagh R confl	Donegal County Council	93.47	River Type 13	54.8569702	-7.9681072	Intermediate	No	Q3-4	5	2		25/08/2016	2016																	Common
1	IE_NW_01F010400	FINN (DONEGAL)_030	FINN (DONEGAL)	RS01F010400	Bridge due S. of Cloghan	Donegal County Council	67.32	River Type 14	54.833674	-7.9354891	Intermediate		Q3-4	5	1		31/07/2007	2007										Few				Common			Common
1	IE_NW_01F010400	FINN (DONEGAL)_030	FINN (DONEGAL)	RS01F010400	Bridge due S. of Cloghan	Donegal County Council	67.32	River Type 14	54.833674	-7.9354891			Q3-4	3			28/07/2011	2011														Few			Few				Few
1	IE_NW_01F010400	FINN (DONEGAL)_030	FINN (DONEGAL)	RS01F010400	Bridge due S. of Cloghan	Donegal County Council	67.32	River Type 14	54.833674	-7.9354891			Q3-4	2	2		01/10/2013	2013														Few
1	IE_NW_01F010400	FINN (DONEGAL)_030	FINN (DONEGAL)	RS01F010400	Bridge due S. of Cloghan	Donegal County Council	67.32	River Type 14	54.833674	-7.9354891	Intermediate	No	Q3	5	2		25/08/2016	2016												Few		Few							Numerous
1	IE_NW_01F010500	FINN (DONEGAL)_040	FINN (DONEGAL)	RS01F010500	Bridge near Glenmore Railway Sta	Donegal County Council	34.09	River Type 13	54.8145277	-7.8712893			Q4	2	1		31/07/2007	2007						Few						Few		Common	Few							Common
1	IE_NW_01F010500	FINN (DONEGAL)_040	FINN (DONEGAL)	RS01F010500	Bridge near Glenmore Railway Sta	Donegal County Council	34.09	River Type 13	54.8145277	-7.8712893			Q4	2	1		21/07/2011	2011		Few					Few			Few		Few		Few
1	IE_NW_01F010500	FINN (DONEGAL)_040	FINN (DONEGAL)	RS01F010500	Bridge near Glenmore Railway Sta	Donegal County Council	34.09	River Type 13	54.8145277	-7.8712893			Q3-4	2	2		01/10/2013	2013												Few		Common	Few						Numerous
1	IE_NW_01F010500	FINN (DONEGAL)_040	FINN (DONEGAL)	RS01F010500	Bridge near Glenmore Railway Sta	Donegal County Council	34.09	River Type 13	54.8145277	-7.8712893	Riffle Glide Pool		Q3-4	3	1		25/08/2016	2016																	Few				Common
1	IE_NW_01F010600	FINN (DONEGAL)_050	FINN (DONEGAL)	RS01F010600	Bridge 2.5 km u/s Ballybofey	Donegal County Council	19.99	River Type 13	54.8030229	-7.8061655			Q3-4	2	1		21/07/2011	2011		Few					Few					Few		Few	Few						Common
1	IE_NW_01F010600	FINN (DONEGAL)_050	FINN (DONEGAL)	RS01F010600	Bridge 2.5 km u/s Ballybofey	Donegal County Council	19.99	River Type 13	54.8030229	-7.8061655			Q3-4	2	2		01/10/2013	2013							Few					Few		Few			Few				Numerous
1	IE_NW_01F010600	FINN (DONEGAL)_050	FINN (DONEGAL)	RS01F010600	Bridge 2.5 km u/s Ballybofey	Donegal County Council	19.99	River Type 13	54.8030229	-7.8061655	Intermediate	No	Q3	4	2		25/08/2016	2016															Few		Common				Few
1	IE_NW_01F010800	FINN (DONEGAL)_060	FINN (DONEGAL)	RS01F010800	Br S of Stranorlar	Donegal County Council	15.9	River Type 22	54.7989943	-7.7629195	Intermediate		Q3	2	2		01/08/2007	2007							Few					Few		Numerous			Numerous
1	IE_NW_01F010800	FINN (DONEGAL)_060	FINN (DONEGAL)	RS01F010800	Br S of Stranorlar	Donegal County Council	15.9	River Type 22	54.7989943	-7.7629195			Q3-4	2	1		21/07/2011	2011		Few					Few					Few		Few
1	IE_NW_01F010800	FINN (DONEGAL)_060	FINN (DONEGAL)	RS01F010800	Br S of Stranorlar	Donegal County Council	15.9	River Type 22	54.7989943	-7.7629195			Q3-4	2	2		01/10/2013	2013		Few										Few		Few	Few		Few				Numerous
1	IE_NW_01F010800	FINN (DONEGAL)_060	FINN (DONEGAL)	RS01F010800	Br S of Stranorlar	Donegal County Council	15.9	River Type 22	54.7989943	-7.7629195	Intermediate	No	Q3	3	1		25/08/2016	2016		Few															Few
1	IE_NW_01F011100	FINN (DONEGAL)_080	FINN (DONEGAL)	RS01F010900	Bridge S. of Killygordon	Donegal County Council	4.54	River Type 22	54.7909587	-7.6791199	Intermediate		Q3	2	1		01/08/2007	2007														Few			Common					Few
1	IE_NW_01F011100	FINN (DONEGAL)_080	FINN (DONEGAL)	RS01F010900	Bridge S. of Killygordon	Donegal County Council	4.54	River Type 22	54.7909587	-7.6791199			Q3-4	2	1		21/07/2011	2011							Few					Few					Few				Common
1	IE_NW_01F011100	FINN (DONEGAL)_080	FINN (DONEGAL)	RS01F010900	Bridge S. of Killygordon	Donegal County Council	4.54	River Type 22	54.7909587	-7.6791199			Q4	2	2		01/10/2013	2013							Few								Few		Few				Few
1	IE_NW_01F011100	FINN (DONEGAL)_080	FINN (DONEGAL)	RS01F010900	Bridge S. of Killygordon	Donegal County Council	4.54	River Type 22	54.7909587	-7.6791199	Intermediate	Yes	Q3	3	1		26/08/2016	2016							Few					Few		Common	Few		Few
1	IE_NW_01F011100	FINN (DONEGAL)_080	FINN (DONEGAL)	RS01F010920	150M D/S Br S. of Killygordon	Donegal County Council	4.54	River Type 22	54.7909587	-7.6791199	Intermediate		Q3	2	1		01/08/2007	2007							Few							Common			Common					Common
1	IE_NW_01F011100	FINN (DONEGAL)_080	FINN (DONEGAL)	RS01F010920	150M D/S Br S. of Killygordon	Donegal County Council	4.54	River Type 22	54.7909587	-7.6791199			Q3	2	1		21/07/2011	2011							Few			Few		Few		Few			Few				Common
1	IE_NW_01F011100	FINN (DONEGAL)_080	FINN (DONEGAL)	RS01F010920	150M D/S Br S. of Killygordon	Donegal County Council	4.54	River Type 22	54.7909587	-7.6791199			Q3-4	2	2		01/10/2013	2013							Few					Few			Few		Few				Numerous
1	IE_NW_01F011100	FINN (DONEGAL)_080	FINN (DONEGAL)	RS01F010920	150M D/S Br S. of Killygordon	Donegal County Council	4.54	River Type 22	54.7909587	-7.6791199			Q3	3	1		26/08/2016	2016							Few							Few	Few		Common
1	IE_NW_01F011100	FINN (DONEGAL)_080	FINN (DONEGAL)	RS01F011100	Castlefin Bridge	Donegal County Council	4.54	River Type 22	54.7984329	-7.5913065	Intermediate		Q3	2	1		01/08/2007	2007		Few					Common							Common			Common
1	IE_NW_01F011100	FINN (DONEGAL)_080	FINN (DONEGAL)	RS01F011100	Castlefin Bridge	Donegal County Council	4.54	River Type 22	54.7984329	-7.5913065			Q3-4	2	1		28/07/2011	2011												Few		Few			Few				Few
1	IE_NW_01F011100	FINN (DONEGAL)_080	FINN (DONEGAL)	RS01F011100	Castlefin Bridge	Donegal County Council	4.54	River Type 22	54.7984329	-7.5913065			Q4	2	2		01/10/2013	2013		Few					Few					Few		Few			Few				Few
1	IE_NW_01F011100	FINN (DONEGAL)_080	FINN (DONEGAL)	RS01F011100	Castlefin Bridge	Donegal County Council	4.54	River Type 22	54.7984329	-7.5913065	Lowland Meandering		Q4	3	1		30/08/2016	2016							Few							Few							Numerous
1	UKGBNI1NW010103062	CARRIGANS_010	GREENHILL STREAM	RS01G020100	Br at Greenhill	Donegal County Council	4.02	River Type 13	54.9560875	-7.4458972			Q2-3	2	1		27/07/2011	2011		Few					Few							Few							Few
1	UKGBNI1NW010103062	CARRIGANS_010	GREENHILL STREAM	RS01G020100	Br at Greenhill	Donegal County Council	4.02	River Type 13	54.9560875	-7.4458972			Q2-3	2	2		02/10/2013	2013		Excessive					Few							Few							Few
1	UKGBNI1NW010103062	CARRIGANS_010	GREENHILL STREAM	RS01G020100	Br at Greenhill	Donegal County Council	4.02	River Type 13	54.9560875	-7.4458972	Riffle Glide Pool		Q2-3	3	1		31/08/2016	2016		Few					Few							Few			Few				Few
1	IE_NW_01M010200	MOURNE BEG_010	MOURNE BEG	RS01M010100	Red Burn Bridge	Donegal County Council	133.96	River Type 13	54.7516858	-7.9099605	Riffle Glide Pool		Q3	2	1		30/07/2007	2007																	Common
1	IE_NW_01M010200	MOURNE BEG_010	MOURNE BEG	RS01M010100	Red Burn Bridge	Donegal County Council	133.96	River Type 13	54.7516858	-7.9099605			Q3	2	1		26/07/2011	2011														Few			Few
1	IE_NW_01M010200	MOURNE BEG_010	MOURNE BEG	RS01M010100	Red Burn Bridge	Donegal County Council	133.96	River Type 13	54.7516858	-7.9099605			Q2-3	2	2		02/10/2013	2013																	Few
1	IE_NW_01M010200	MOURNE BEG_010	MOURNE BEG	RS01M010100	Red Burn Bridge	Donegal County Council	133.96	River Type 13	54.7516858	-7.9099605	Riffle Glide Pool	No	Q3-4	3	1		23/08/2016	2016																	Few
1	IE_NW_01M010200	MOURNE BEG_010	MOURNE BEG	RS01M010200	Bridge S.W. of Tonreagh	Donegal County Council	133.96	River Type 13	54.7425204	-7.8462194	Riffle Glide Pool		Q3	2	1		30/07/2007	2007																	Common
1	IE_NW_01M010200	MOURNE BEG_010	MOURNE BEG	RS01M010200	Bridge S.W. of Tonreagh	Donegal County Council	133.96	River Type 13	54.7425204	-7.8462194			Q3	2	1		26/07/2011	2011														Few			Few
1	IE_NW_01M010200	MOURNE BEG_010	MOURNE BEG	RS01M010200	Bridge S.W. of Tonreagh	Donegal County Council	133.96	River Type 13	54.7425204	-7.8462194			Q3	5	1		31/07/2013	2013																	Few
1	IE_NW_01M010200	MOURNE BEG_010	MOURNE BEG	RS01M010200	Bridge S.W. of Tonreagh	Donegal County Council	133.96	River Type 13	54.7425204	-7.8462194	Riffle Glide Pool	No	Q2-3	3	1		23/08/2016	2016															Few		Few
1	IE_NW_01R010200	REELAN_010	REELAN	RS01R010200	Ford W. of Carrickagh	Donegal County Council	120	River Type 14	54.8162637	-8.033603			Q3-4	2	1		19/07/2011	2011														Few			Few				Few
1	IE_NW_01R010200	REELAN_010	REELAN	RS01R010200	Ford W. of Carrickagh	Donegal County Council	120	River Type 14	54.8162637	-8.033603			Q4	3	1		07/08/2013	2013														Few			Few
1	IE_NW_01R010200	REELAN_010	REELAN	RS01R010200	Ford W. of Carrickagh	Donegal County Council	120	River Type 14	54.8162637	-8.033603	Riffle Glide Pool	No	Q3	4	1		26/08/2016	2016														Few	Few		Common
1	IE_NW_01R010500	REELAN_020	REELAN	RS01R010300	REELAN - Bridge E. of Carrickagh	Donegal County Council	62.99	River Type 14	54.8158011	-7.9928577	Intermediate		Q3-4	2			12/05/2008	2008															Few		Common
1	IE_NW_01R010500	REELAN_020	REELAN	RS01R010300	REELAN - Bridge E. of Carrickagh	Donegal County Council	62.99	River Type 14	54.8158011	-7.9928577			Q3-4	8	4		07/08/2013	2013														Few	Few		Few
1	IE_NW_01R010500	REELAN_020	REELAN	RS01R010300	REELAN - Bridge E. of Carrickagh	Donegal County Council	62.99	River Type 14	54.8158011	-7.9928577	Cascade Step Pool (CSP)	No	Q3	4	1		26/08/2016	2016														Few			Few
1	IE_NW_01R010500	REELAN_020	REELAN	RS01R010500	Reelan Bridge	Donegal County Council	62.99	River Type 14	54.8215005	-7.963592	Intermediate		Q3-4	2	1		12/05/2008	2008														Few			Common
1	IE_NW_01R010500	REELAN_020	REELAN	RS01R010500	Reelan Bridge	Donegal County Council	62.99	River Type 14	54.8215005	-7.963592			Q3-4	2	1		19/07/2011	2011																	Numerous
1	IE_NW_01R010500	REELAN_020	REELAN	RS01R010500	Reelan Bridge	Donegal County Council	62.99	River Type 14	54.8215005	-7.963592			Q3	8	2		07/08/2013	2013							Few			Few							Few
1	IE_NW_01R010500	REELAN_020	REELAN	RS01R010500	Reelan Bridge	Donegal County Council	62.99	River Type 14	54.8215005	-7.963592	Riffle Glide Pool		Q2-3	10	1		26/08/2016	2016														Few
1	IE_NW_01R020200	ROUGH BURN_010	ROUGH BURN	RS01R020200	Bridge u/s Finn River confl	Donegal County Council	36.25	River Type 13	54.8108189	-7.8556719			Q4	2	2		01/10/2013	2013												Common		Few							Numerous
1	IE_NW_01R020200	ROUGH BURN_010	ROUGH BURN	RS01R020200	Bridge u/s Finn River confl	Donegal County Council	36.25	River Type 13	54.8108189	-7.8556719	Intermediate	No	Q3	4	2		25/08/2016	2016														Few	Few						Numerous
1	IE_NW_01S010280	ST JOHNSTON_010	ST JOHNSTON	RS01S010280	Second Bridge u/s Foyle River	Donegal County Council	9.18	River Type 23	54.9356625	-7.4607267			Q3	2	1		27/07/2011	2011														Few							Numerous
1	IE_NW_01S010280	ST JOHNSTON_010	ST JOHNSTON	RS01S010280	Second Bridge u/s Foyle River	Donegal County Council	9.18	River Type 23	54.9356625	-7.4607267			Q2	3			02/10/2013	2013														Few							Few
1	IE_NW_01S010280	ST JOHNSTON_010	ST JOHNSTON	RS01S010280	Second Bridge u/s Foyle River	Donegal County Council	9.18	River Type 23	54.9356625	-7.4607267	Riffle Glide Pool	Yes	Q3	2	1		10/06/2014	2014		Single						Single		Few				Few							Few
1	IE_NW_01S010280	ST JOHNSTON_010	ST JOHNSTON	RS01S010280	Second Bridge u/s Foyle River	Donegal County Council	9.18	River Type 23	54.9356625	-7.4607267	Riffle Glide Pool	No	Q2-3	3	1		31/08/2016	2016		Few												Few			Few				Numerous
1	IE_NW_01S020200	STRANAGOPPOGE_010	STRANAGOPPOGE	RS01S020100	Br W Tieveragh	Donegal County Council	129.45	River Type 14	54.8400768	-8.1100121			Q3-4	2	1		19/07/2011	2011										Few				Few			Few				Common
1	IE_NW_01S020200	STRANAGOPPOGE_010	STRANAGOPPOGE	RS01S020100	Br W Tieveragh	Donegal County Council	129.45	River Type 14	54.8400768	-8.1100121			Q3	6	2		08/08/2013	2013															Few		Few				Numerous
1	IE_NW_01S020200	STRANAGOPPOGE_010	STRANAGOPPOGE	RS01S020100	Br W Tieveragh	Donegal County Council	129.45	River Type 14	54.8400768	-8.1100121	Riffle Glide Pool	No	Q3-4	3	1		24/08/2016	2016														Few			Common				Common
1	IE_NW_01S020200	STRANAGOPPOGE_010	STRANAGOPPOGE	RS01S020200	Bridge u/s Finn River confl	Donegal County Council	129.45	River Type 14	54.8663236	-8.0646349			Q3-4	3			19/07/2011	2011										Few		Few		Few	Few		Few				Few
1	IE_NW_01S020200	STRANAGOPPOGE_010	STRANAGOPPOGE	RS01S020200	Bridge u/s Finn River confl	Donegal County Council	129.45	River Type 14	54.8663236	-8.0646349			Q3	2	1		08/08/2013	2013										Few		Few		Few			Few				Few
1	IE_NW_01S020200	STRANAGOPPOGE_010	STRANAGOPPOGE	RS01S020200	Bridge u/s Finn River confl	Donegal County Council	129.45	River Type 14	54.8663236	-8.0646349	Cascade Step Pool (CSP)	No	Q4	4	2		24/08/2016	2016																	Few				Dominant
1	IE_NW_01S030200	SWILLY BURN_010	SWILLY BURN	RS01S030150	SWILLY BURN - Br NE of Cooladerry (u/s STW)	Donegal County Council	15.21	River Type 33	54.8648866	-7.5990871	Riffle Glide Pool		Q3	2	1		09/06/2014	2014									Few	Few				Common			Few				Few
1	IE_NW_01S030200	SWILLY BURN_010	SWILLY BURN	RS01S030150	SWILLY BURN - Br NE of Cooladerry (u/s STW)	Donegal County Council	15.21	River Type 33	54.8648866	-7.5990871	Riffle Glide Pool		Q2-3	3	1		31/08/2016	2016							Few					Few		Common	Few		Few
1	IE_NW_01S030200	SWILLY BURN_010	SWILLY BURN	RS01S030200	Br. 1.5km SE of Raphoe, S Magheraha	Donegal County Council	15.21	River Type 33	54.864061	-7.5885373			Q2	3			20/07/2011	2011														Few	Few						Few
1	IE_NW_01S030200	SWILLY BURN_010	SWILLY BURN	RS01S030200	Br. 1.5km SE of Raphoe, S Magheraha	Donegal County Council	15.21	River Type 33	54.864061	-7.5885373			Q1-2	3			02/10/2013	2013														Common
1	IE_NW_01S030200	SWILLY BURN_010	SWILLY BURN	RS01S030200	Br. 1.5km SE of Raphoe, S Magheraha	Donegal County Council	15.21	River Type 33	54.864061	-7.5885373	Riffle Glide Pool		Q3	2	1		10/09/2014	2014							Few							Few							Single
1	IE_NW_01S030200	SWILLY BURN_010	SWILLY BURN	RS01S030200	Br. 1.5km SE of Raphoe, S Magheraha	Donegal County Council	15.21	River Type 33	54.864061	-7.5885373	Riffle Glide Pool	No	Q2-3	3	1		31/08/2016	2016		Few															Few
3	IE_NB_03B010130	BLACKWATER (MONAGHAN)_010	BLACKWATER (MONAGHAN)	RS03B010130	1.5km d/s Scotstown Br.	Monaghan County Council	68.04	River Type 32	54.2685317	-7.0575895			Q4	2			04/07/2007	2007														Few			Single					Dominant									Few
3	IE_NB_03B010130	BLACKWATER (MONAGHAN)_010	BLACKWATER (MONAGHAN)	RS03B010130	1.5km d/s Scotstown Br.	Monaghan County Council	68.04	River Type 32	54.2685317	-7.0575895			Q4	2	1		06/07/2010	2010														Few								Dominant									Few
3	IE_NB_03B010130	BLACKWATER (MONAGHAN)_010	BLACKWATER (MONAGHAN)	RS03B010130	1.5km d/s Scotstown Br.	Monaghan County Council	68.04	River Type 32	54.2685317	-7.0575895			Q4	2	1		28/06/2013	2013														Few							Numerous										Few
3	IE_NB_03B010130	BLACKWATER (MONAGHAN)_010	BLACKWATER (MONAGHAN)	RS03B010130	1.5km d/s Scotstown Br.	Monaghan County Council	68.04	River Type 32	54.2685317	-7.0575895	Riffle Glide Pool		Q4	3	1		31/08/2017	2017														Common							Dominant
3	IE_NB_03B010300	BLACKWATER (MONAGHAN)_020	BLACKWATER (MONAGHAN)	RS03B010300	1st Br d/s Ballinode	Monaghan County Council	57.48	River Type 32	54.2667354	-7.0205842			Q3-4	1			04/07/2007	2007														Few								Excessive									Few
3	IE_NB_03B010300	BLACKWATER (MONAGHAN)_020	BLACKWATER (MONAGHAN)	RS03B010300	1st Br d/s Ballinode	Monaghan County Council	57.48	River Type 32	54.2667354	-7.0205842			Q3-4	2	1		06/07/2010	2010														Few								Dominant									Few
3	IE_NB_03B010300	BLACKWATER (MONAGHAN)_020	BLACKWATER (MONAGHAN)	RS03B010300	1st Br d/s Ballinode	Monaghan County Council	57.48	River Type 32	54.2667354	-7.0205842			Q4	2	5		19/06/2013	2013														Few							Numerous										Few
3	IE_NB_03B010300	BLACKWATER (MONAGHAN)_020	BLACKWATER (MONAGHAN)	RS03B010300	1st Br d/s Ballinode	Monaghan County Council	57.48	River Type 32	54.2667354	-7.0205842	Riffle Glide Pool	No	Q4	3	1		31/08/2017	2017														Few							Excessive
3	IE_NB_03B010510	BLACKWATER (MONAGHAN)_030	BLACKWATER (MONAGHAN)	RS03B010510	250m d/s Br nr Milltown	Monaghan County Council	52.64	River Type 31	54.2553494	-6.9780459			Q3-4	2			03/07/2007	2007														Few								Excessive									Common
3	IE_NB_03B010510	BLACKWATER (MONAGHAN)_030	BLACKWATER (MONAGHAN)	RS03B010510	250m d/s Br nr Milltown	Monaghan County Council	52.64	River Type 31	54.2553494	-6.9780459			Q3-4	2	1		06/07/2010	2010														Few			Few					Dominant									Few
3	IE_NB_03B010510	BLACKWATER (MONAGHAN)_030	BLACKWATER (MONAGHAN)	RS03B010510	250m d/s Br nr Milltown	Monaghan County Council	52.64	River Type 31	54.2553494	-6.9780459			Q4	2	1		19/06/2013	2013														Few							Dominant
3	IE_NB_03B010510	BLACKWATER (MONAGHAN)_030	BLACKWATER (MONAGHAN)	RS03B010510	250m d/s Br nr Milltown	Monaghan County Council	52.64	River Type 31	54.2553494	-6.9780459	Riffle Glide Pool	Yes	Q4	3	1		13/09/2017	2017		Few												Few							Dominant										Few
3	IE_NB_03B010800	BLACKWATER (MONAGHAN)_040	BLACKWATER (MONAGHAN)	RS03B010650	Faulkland Br (Upr)	Monaghan County Council	39.3	River Type 31	54.2772607	-6.9378168			Q3	2			04/07/2007	2007		Few				Few								Numerous								Excessive
3	IE_NB_03B010800	BLACKWATER (MONAGHAN)_040	BLACKWATER (MONAGHAN)	RS03B010650	Faulkland Br (Upr)	Monaghan County Council	39.3	River Type 31	54.2772607	-6.9378168			Q3	2			06/07/2010	2010		Few				Few								Common								Dominant
3	IE_NB_03B010800	BLACKWATER (MONAGHAN)_040	BLACKWATER (MONAGHAN)	RS03B010650	Faulkland Br (Upr)	Monaghan County Council	39.3	River Type 31	54.2772607	-6.9378168			Q3-4	2	1		26/06/2013	2013														Few							Excessive
3	IE_NB_03B010800	BLACKWATER (MONAGHAN)_040	BLACKWATER (MONAGHAN)	RS03B010650	Faulkland Br (Upr)	Monaghan County Council	39.3	River Type 31	54.2772607	-6.9378168	Riffle Glide Pool	Yes	Q3-4	3	1		14/09/2017	2017							Few					Few		Common							Dominant
3	IE_NB_03B010800	BLACKWATER (MONAGHAN)_040	BLACKWATER (MONAGHAN)	RS03B010800	Newmills Br	Monaghan County Council	39.3	River Type 31	54.292647	-6.8966378			Q3	2			04/07/2007	2007		Few												Common								Excessive
3	IE_NB_03B010800	BLACKWATER (MONAGHAN)_040	BLACKWATER (MONAGHAN)	RS03B010800	Newmills Br	Monaghan County Council	39.3	River Type 31	54.292647	-6.8966378			Q3	2	1		06/07/2010	2010		Few					Few							Common								Excessive
3	IE_NB_03B010800	BLACKWATER (MONAGHAN)_040	BLACKWATER (MONAGHAN)	RS03B010800	Newmills Br	Monaghan County Council	39.3	River Type 31	54.292647	-6.8966378			Q3-4	2	1		26/06/2013	2013														Few							Dominant										Few
3	IE_NB_03B010800	BLACKWATER (MONAGHAN)_040	BLACKWATER (MONAGHAN)	RS03B010800	Newmills Br	Monaghan County Council	39.3	River Type 31	54.292647	-6.8966378	Riffle Glide Pool	Yes	Q3-4	2	1	3	14/09/2017	2017														Common							Dominant
3	UKGBNI1NB030308202	CLONTIBRET STREAM_010	CLONTIBRET STREAM	RS03C010600	Br in Clontibret	Monaghan County Council	44.25	River Type 12	54.2034003	-6.8391449			Q3				03/07/2007	2007		Few												Few								Dominant
3	UKGBNI1NB030308202	CLONTIBRET STREAM_010	CLONTIBRET STREAM	RS03C010600	Br in Clontibret	Monaghan County Council	44.25	River Type 12	54.2034003	-6.8391449			Q2-3	2	1		01/07/2010	2010							Common							Few								Dominant
3	UKGBNI1NB030308202	CLONTIBRET STREAM_010	CLONTIBRET STREAM	RS03C010600	Br in Clontibret	Monaghan County Council	44.25	River Type 12	54.2034003	-6.8391449			Q3	2	1		18/06/2013	2013														Few							Dominant
3	UKGBNI1NB030308202	CLONTIBRET STREAM_010	CLONTIBRET STREAM	RS03C010600	Br in Clontibret	Monaghan County Council	44.25	River Type 12	54.2034003	-6.8391449	Riffle Glide Pool		Q3	3	1		30/08/2017	2017												Few		Few	Few						Dominant
3	UKGBNI1NB030308202	CLONTIBRET STREAM_010	CLONTIBRET STREAM	RS03C011100	CLONTIBRET STREAM - Br SW of Clerran	Monaghan County Council	44.25	River Type 12	54.2283312	-6.8594722			Q3	2	1		01/07/2010	2010																						Dominant
3	UKGBNI1NB030308202	CLONTIBRET STREAM_010	CLONTIBRET STREAM	RS03C011100	CLONTIBRET STREAM - Br SW of Clerran	Monaghan County Council	44.25	River Type 12	54.2283312	-6.8594722			Q3	2	1		18/06/2013	2013																					Numerous
3	UKGBNI1NB030308202	CLONTIBRET STREAM_010	CLONTIBRET STREAM	RS03C011100	CLONTIBRET STREAM - Br SW of Clerran	Monaghan County Council	44.25	River Type 12	54.2283312	-6.8594722	Riffle Glide Pool		Q2-3	3	1		30/08/2017	2017		Few				Few								Few							Numerous
3	IE_NB_03C011400	CLONTIBRET STREAM_030	CLONTIBRET STREAM	RS03C011400	Br E of Killyneill X-Roads	Monaghan County Council	36.41	River Type 22	54.2645394	-6.8669156			Q3	2			03/07/2007	2007		Few												Few								Excessive
3	IE_NB_03C011400	CLONTIBRET STREAM_030	CLONTIBRET STREAM	RS03C011400	Br E of Killyneill X-Roads	Monaghan County Council	36.41	River Type 22	54.2645394	-6.8669156			Q3	2	1		01/07/2010	2010		Few												Few								Dominant
3	IE_NB_03C011400	CLONTIBRET STREAM_030	CLONTIBRET STREAM	RS03C011400	Br E of Killyneill X-Roads	Monaghan County Council	36.41	River Type 22	54.2645394	-6.8669156			Q3	3	2		18/06/2013	2013						Few	Few							Few							Excessive
3	IE_NB_03C011400	CLONTIBRET STREAM_030	CLONTIBRET STREAM	RS03C011400	Br E of Killyneill X-Roads	Monaghan County Council	36.41	River Type 22	54.2645394	-6.8669156	Riffle Glide Pool	No	Q3	3	1		30/08/2017	2017														Common							Dominant
3	IE_NB_03C021100	CONAWARY (LOWER)_010	CONAWARY (LOWER)	RS03C021100	CONAWARY (LOWER) - White Br	Monaghan County Council	59.99	River Type 31	54.2379974	-7.0194841			Q3	2	1		06/07/2010	2010														Few								Dominant
3	IE_NB_03C021100	CONAWARY (LOWER)_010	CONAWARY (LOWER)	RS03C021100	CONAWARY (LOWER) - White Br	Monaghan County Council	59.99	River Type 31	54.2379974	-7.0194841			Q3	2	1		01/07/2013	2013														Few							Dominant
3	IE_NB_03C021100	CONAWARY (LOWER)_010	CONAWARY (LOWER)	RS03C021100	CONAWARY (LOWER) - White Br	Monaghan County Council	59.99	River Type 31	54.2379974	-7.0194841	Riffle Glide Pool		Q3	3	1		31/08/2017	2017														Few							Dominant
3	IE_NB_03C021300	CONAWARY (LOWER)_020	CONAWARY (LOWER)	RS03C021300	Br u/s Blackwater R confl	Monaghan County Council	54.75	River Type 32	54.2558128	-6.9957744			Q3	2			03/07/2007	2007														Common								Excessive									Few
3	IE_NB_03C021300	CONAWARY (LOWER)_020	CONAWARY (LOWER)	RS03C021300	Br u/s Blackwater R confl	Monaghan County Council	54.75	River Type 32	54.2558128	-6.9957744			Q3	2	1		06/07/2010	2010														Few								Dominant									Few
3	IE_NB_03C021300	CONAWARY (LOWER)_020	CONAWARY (LOWER)	RS03C021300	Br u/s Blackwater R confl	Monaghan County Council	54.75	River Type 32	54.2558128	-6.9957744			Q3	2	1		01/07/2013	2013														Few	Few						Numerous
3	IE_NB_03C021300	CONAWARY (LOWER)_020	CONAWARY (LOWER)	RS03C021300	Br u/s Blackwater R confl	Monaghan County Council	54.75	River Type 32	54.2558128	-6.9957744	Riffle Glide Pool	Yes	Q3	3	1		13/09/2017	2017														Few	Few						Dominant
3	UKGBNI1NB030308254	MOUNTAIN WATER_010	MOUNTAIN WATER	RS03M010100	Coyle's Br.	Monaghan County Council	151.51	River Type 33	54.3606467	-7.0809442			Q4	2			04/07/2007	2007																						Few									Common
3	UKGBNI1NB030308254	MOUNTAIN WATER_010	MOUNTAIN WATER	RS03M010100	Coyle's Br.	Monaghan County Council	151.51	River Type 33	54.3606467	-7.0809442			Q4	2	1		05/07/2010	2010														Few								Numerous									Few
3	UKGBNI1NB030308254	MOUNTAIN WATER_010	MOUNTAIN WATER	RS03M010100	Coyle's Br.	Monaghan County Council	151.51	River Type 33	54.3606467	-7.0809442			Q4-5	2	1		27/06/2013	2013														Few							Few
3	UKGBNI1NB030308254	MOUNTAIN WATER_010	MOUNTAIN WATER	RS03M010100	Coyle's Br.	Monaghan County Council	151.51	River Type 33	54.3606467	-7.0809442	Riffle Glide Pool	Yes	Q4-5	3	1		13/09/2017	2017																					Common										Few
3	IE_NB_03M010200	MOUNTAIN WATER_020	MOUNTAIN WATER	RS03M010200	Br NE of Golan	Monaghan County Council	105.43	River Type 33	54.3405226	-7.0364943			Q4	2			05/07/2007	2007						Few				Few				Few								Dominant									Few
3	IE_NB_03M010200	MOUNTAIN WATER_020	MOUNTAIN WATER	RS03M010200	Br NE of Golan	Monaghan County Council	105.43	River Type 33	54.3405226	-7.0364943			Q4	2	1		05/07/2010	2010														Few								Dominant									Few
3	IE_NB_03M010200	MOUNTAIN WATER_020	MOUNTAIN WATER	RS03M010200	Br NE of Golan	Monaghan County Council	105.43	River Type 33	54.3405226	-7.0364943			Q4-5	2	1		27/06/2013	2013														Few							Common
3	IE_NB_03M010200	MOUNTAIN WATER_020	MOUNTAIN WATER	RS03M010200	Br NE of Golan	Monaghan County Council	105.43	River Type 33	54.3405226	-7.0364943	Riffle Glide Pool		Q4	3	1		30/08/2017	2017												Few									Dominant
3	IE_NB_03M010400	MOUNTAIN WATER_030	MOUNTAIN WATER	RS03M010400	1st Br. u/s Emyvale	Monaghan County Council	59.02	River Type 32	54.3343588	-6.9688103			Q3-4	2			05/07/2007	2007														Few								Dominant									Few
3	IE_NB_03M010400	MOUNTAIN WATER_030	MOUNTAIN WATER	RS03M010400	1st Br. u/s Emyvale	Monaghan County Council	59.02	River Type 32	54.3343588	-6.9688103			Q3-4	2	1		05/07/2010	2010														Few								Dominant									Few
3	IE_NB_03M010400	MOUNTAIN WATER_030	MOUNTAIN WATER	RS03M010400	1st Br. u/s Emyvale	Monaghan County Council	59.02	River Type 32	54.3343588	-6.9688103			Q4	2	1		27/06/2013	2013														Few							Dominant
3	IE_NB_03M010400	MOUNTAIN WATER_030	MOUNTAIN WATER	RS03M010400	1st Br. u/s Emyvale	Monaghan County Council	59.02	River Type 32	54.3343588	-6.9688103	Riffle Glide Pool	No	Q4-5	3	1		30/08/2017	2017												Few		Common							Numerous										Few
3	IE_NB_03M010500	MOUNTAIN WATER_040	MOUNTAIN WATER	RS03M010500	Br. 1.1km d/s Emyvale	Monaghan County Council	45.55	River Type 32	54.332309	-6.9475189			Q3	2			05/07/2007	2007										Few												Excessive									Few
3	IE_NB_03M010500	MOUNTAIN WATER_040	MOUNTAIN WATER	RS03M010500	Br. 1.1km d/s Emyvale	Monaghan County Council	45.55	River Type 32	54.332309	-6.9475189			Q3	2	1		05/07/2010	2010																						Excessive									Few
3	IE_NB_03M010500	MOUNTAIN WATER_040	MOUNTAIN WATER	RS03M010500	Br. 1.1km d/s Emyvale	Monaghan County Council	45.55	River Type 32	54.332309	-6.9475189			Q3	2	1		27/06/2013	2013														Few							Excessive										Few
3	IE_NB_03M010500	MOUNTAIN WATER_040	MOUNTAIN WATER	RS03M010500	Br. 1.1km d/s Emyvale	Monaghan County Council	45.55	River Type 32	54.332309	-6.9475189	Riffle Glide Pool	No	Q3	3	1		30/08/2017	2017														Few							Excessive
3	IE_NB_03M010650	MOUNTAIN WATER_050	MOUNTAIN WATER	RS03M010650	MOUNTAIN WATER - Br N of Glaslough	Monaghan County Council	38.55	River Type 32	54.323404	-6.8941836			Q3-4	2	1		05/07/2010	2010							Few							Few			Few					Dominant									Few
3	IE_NB_03M010650	MOUNTAIN WATER_050	MOUNTAIN WATER	RS03M010650	MOUNTAIN WATER - Br N of Glaslough	Monaghan County Council	38.55	River Type 32	54.323404	-6.8941836			Q3	2	1		27/06/2013	2013							Few							Few							Excessive
3	IE_NB_03M010650	MOUNTAIN WATER_050	MOUNTAIN WATER	RS03M010650	MOUNTAIN WATER - Br N of Glaslough	Monaghan County Council	38.55	River Type 32	54.323404	-6.8941836	Lowland Meandering	No	Q3-4	3	1		30/08/2017	2017														Common	Few						Dominant
3	IE_NB_03S010500	SHAMBLES_010	SHAMBLES	RS03S010500	Culvert u/s of N2 Roundabout, Armagh Road.	Monaghan County Council	51.61	River Type 32	54.2589439	-6.9560718			Q2-3	3			19/09/2007	2007		Few				Few	Few							Common			Few					Single
3	IE_NB_03S010500	SHAMBLES_010	SHAMBLES	RS03S010500	Culvert u/s of N2 Roundabout, Armagh Road.	Monaghan County Council	51.61	River Type 32	54.2589439	-6.9560718			Q2-3	2	1		06/07/2010	2010						Few	Common							Few			Few					Single
3	IE_NB_03S010500	SHAMBLES_010	SHAMBLES	RS03S010500	Culvert u/s of N2 Roundabout, Armagh Road.	Monaghan County Council	51.61	River Type 32	54.2589439	-6.9560718			Q2-3	2	1		18/06/2013	2013		Few				Few								Few							Dominant
3	IE_NB_03S010500	SHAMBLES_010	SHAMBLES	RS03S010500	Culvert u/s of N2 Roundabout, Armagh Road.	Monaghan County Council	51.61	River Type 32	54.2589439	-6.9560718	Riffle Glide Pool	Yes	Q2-3	2	1		14/09/2017	2017						Few	Common							Common							Dominant
3	UKGBNI1NB030308255	SCOTSTOWN_010	SCOTSTOWN	RS03S020200	Br S of Knockballyroney	Monaghan County Council	90.35	River Type 33	54.317626	-7.0956274			Q4-5	2			04/07/2007	2007										Few							Few					Few
3	UKGBNI1NB030308255	SCOTSTOWN_010	SCOTSTOWN	RS03S020200	Br S of Knockballyroney	Monaghan County Council	90.35	River Type 33	54.317626	-7.0956274			Q4-5	2	1		05/07/2010	2010																	Few					Few
3	UKGBNI1NB030308255	SCOTSTOWN_010	SCOTSTOWN	RS03S020200	Br S of Knockballyroney	Monaghan County Council	90.35	River Type 33	54.317626	-7.0956274			Q4-5	2	1		01/07/2013	2013																	Few				Few
3	UKGBNI1NB030308255	SCOTSTOWN_010	SCOTSTOWN	RS03S020200	Br S of Knockballyroney	Monaghan County Council	90.35	River Type 33	54.317626	-7.0956274	Riffle Glide Pool	Yes	Q4	6	1		31/08/2017	2017
3	UKGBNI1NB030308255	SCOTSTOWN_010	SCOTSTOWN	RS03S020200	Br S of Knockballyroney	Monaghan County Council	90.35	River Type 33	54.317626	-7.0956274	Riffle Glide Pool	No	Q4-5	2	1		18/06/2018	2018																	Few
3	UKGBNI1NB030308255	SCOTSTOWN_010	SCOTSTOWN	RS03S020400	SCOTSTOWN - Br at Mill S of Dromscor	Monaghan County Council	90.35	River Type 33	54.302635	-7.0782323			Q4	2	1		05/07/2010	2010														Few								Numerous									Few
3	UKGBNI1NB030308255	SCOTSTOWN_010	SCOTSTOWN	RS03S020400	SCOTSTOWN - Br at Mill S of Dromscor	Monaghan County Council	90.35	River Type 33	54.302635	-7.0782323			Q4-5	2	1		01/07/2013	2013														Few							Common										Few
3	UKGBNI1NB030308255	SCOTSTOWN_010	SCOTSTOWN	RS03S020400	SCOTSTOWN - Br at Mill S of Dromscor	Monaghan County Council	90.35	River Type 33	54.302635	-7.0782323	Riffle Glide Pool	Yes	Q4-5	3	1		31/08/2017	2017														Few							Dominant										Few
3	IE_NB_03S020500	SCOTSTOWN_020	SCOTSTOWN	RS03S020500	Br u/s Scotstown Br	Monaghan County Council	73.24	River Type 33	54.2835221	-7.061628			Q4	2			04/07/2007	2007														Few								Common									Few
3	IE_NB_03S020500	SCOTSTOWN_020	SCOTSTOWN	RS03S020500	Br u/s Scotstown Br	Monaghan County Council	73.24	River Type 33	54.2835221	-7.061628			Q4	2	1		05/07/2010	2010										Few				Few																	Few
3	IE_NB_03S020500	SCOTSTOWN_020	SCOTSTOWN	RS03S020500	Br u/s Scotstown Br	Monaghan County Council	73.24	River Type 33	54.2835221	-7.061628			Q4-5	2	1		01/07/2013	2013										Few				Few							Dominant
3	IE_NB_03S020500	SCOTSTOWN_020	SCOTSTOWN	RS03S020500	Br u/s Scotstown Br	Monaghan County Council	73.24	River Type 33	54.2835221	-7.061628	Riffle Glide Pool	Yes	Q4-5	3	1		31/08/2017	2017														Few							Dominant										Few
6	IE_NB_06A011000	ANNAHALE STREAM_010	ANNAHALE STREAM	RS06A011000	ANNAHALE STREAM - Br SE of Druncrew	Monaghan County Council	92.68	River Type 12	54.0970121	-6.7114619	Riffle Glide Pool	No	Q3	2			21/06/2018	2018														Few	Few		Few				Dominant
6	IE_NB_06B010100	BIG (LOUTH)_010	BIG (LOUTH)	RS06B010100	Ballygoly Br	Louth County Council	91.3	River Type 24	54.0245481	-6.2427867			Q4	4	2		25/06/2009	2009														Few								Common
6	IE_NB_06B010100	BIG (LOUTH)_010	BIG (LOUTH)	RS06B010100	Ballygoly Br	Louth County Council	91.3	River Type 24	54.0245481	-6.2427867	Riffle Glide Pool	No	Q4	2	1		08/06/2015	2015								Few						Few			Few				Common
6	IE_NB_06B010100	BIG (LOUTH)_010	BIG (LOUTH)	RS06B010100	Ballygoly Br	Louth County Council	91.3	River Type 24	54.0245481	-6.2427867	Riffle Glide Pool	No	Q4	2	5		07/06/2018	2018		Few															Few				Few
6	IE_NB_06B010300	BIG (LOUTH)_020	BIG (LOUTH)	RS06B010300	Riverstown Br	Louth County Council	20.79	River Type 23	53.9948069	-6.2230541			Q3	3	2		25/06/2009	2009														Few	Single		Few					Single
6	IE_NB_06B010300	BIG (LOUTH)_020	BIG (LOUTH)	RS06B010300	Riverstown Br	Louth County Council	20.79	River Type 23	53.9948069	-6.2230541			Q4-5	2	1		28/09/2011	2011														Few
6	IE_NB_06B010300	BIG (LOUTH)_020	BIG (LOUTH)	RS06B010300	Riverstown Br	Louth County Council	20.79	River Type 23	53.9948069	-6.2230541	Riffle Glide Pool	No	Q3-4	2	1		08/06/2015	2015														Few							Common
6	IE_NB_06B010300	BIG (LOUTH)_020	BIG (LOUTH)	RS06B010300	Riverstown Br	Louth County Council	20.79	River Type 23	53.9948069	-6.2230541	Riffle Glide Pool	No	Q3-4	2	5		07/06/2018	2018															Single		Common				Few
6	UKGBNI1NB060602038	BALLYMASCANLAN_010	BALLYMASCANLAN	RS06B020100	Jonesborough Br	Louth County Council	53.76	River Type 22	54.0684119	-6.3740756			Q2	2			24/10/2007	2007							Few							Common
6	UKGBNI1NB060602038	BALLYMASCANLAN_010	BALLYMASCANLAN	RS06B020100	Jonesborough Br	Louth County Council	53.76	River Type 22	54.0684119	-6.3740756			Q2-3	2			07/10/2008	2008														Single								Few
6	UKGBNI1NB060602038	BALLYMASCANLAN_010	BALLYMASCANLAN	RS06B020100	Jonesborough Br	Louth County Council	53.76	River Type 22	54.0684119	-6.3740756			Q3-4	2	1		05/10/2009	2009														Few								Numerous
6	UKGBNI1NB060602038	BALLYMASCANLAN_010	BALLYMASCANLAN	RS06B020100	Jonesborough Br	Louth County Council	53.76	River Type 22	54.0684119	-6.3740756			Q3-4	4	2		16/09/2010	2010														Few		Few						Numerous
6	UKGBNI1NB060602038	BALLYMASCANLAN_010	BALLYMASCANLAN	RS06B020100	Jonesborough Br	Louth County Council	53.76	River Type 22	54.0684119	-6.3740756			Q3-4				06/09/2012	2012									Single	Single				Single	Few		Few					Single		Common
6	UKGBNI1NB060602038	BALLYMASCANLAN_010	BALLYMASCANLAN	RS06B020100	Jonesborough Br	Louth County Council	53.76	River Type 22	54.0684119	-6.3740756	Riffle Glide Pool	Unknown	Q3	2	1		08/06/2015	2015									Single					Few	Single							Dominant		Dominant
6	UKGBNI1NB060602038	BALLYMASCANLAN_010	BALLYMASCANLAN	RS06B020100	Jonesborough Br	Louth County Council	53.76	River Type 22	54.0684119	-6.3740756	Riffle Glide Pool	No	Q3	2	1		16/07/2018	2018										Few				Few							Dominant
6	UKGBNI1NB060602038	BALLYMASCANLAN_010	BALLYMASCANLAN	RS06B020200	BALLYMASCANLAN - Br nr Carrickaneena House	Louth County Council	53.76	River Type 22	54.0604448	-6.3698714			Q3	3			07/10/2008	2008										Few				Common								Few
6	UKGBNI1NB060602038	BALLYMASCANLAN_010	BALLYMASCANLAN	RS06B020200	BALLYMASCANLAN - Br nr Carrickaneena House	Louth County Council	53.76	River Type 22	54.0604448	-6.3698714	Riffle Glide Pool	No	Q3	2	1		16/07/2018	2018														Few			Few					Numerous
6	UKGBNI1NB060608246	CASTLETOWN_010	CASTLETOWN	RS06C010050	Ballybinaby Br	Louth County Council	53.77	River Type 12	54.0460675	-6.5367527			Q3	5	2		18/06/2009	2009														Few	Single							Excessive
6	UKGBNI1NB060608246	CASTLETOWN_010	CASTLETOWN	RS06C010050	Ballybinaby Br	Louth County Council	53.77	River Type 12	54.0460675	-6.5367527			Q3				06/09/2012	2012		Single												Few	Few									Dominant
6	UKGBNI1NB060608246	CASTLETOWN_010	CASTLETOWN	RS06C010050	Ballybinaby Br	Louth County Council	53.77	River Type 12	54.0460675	-6.5367527	Riffle Glide Pool	Yes	Q3-4	2	1		02/06/2015	2015														Few	Few									Dominant
6	UKGBNI1NB060608246	CASTLETOWN_010	CASTLETOWN	RS06C010050	Ballybinaby Br	Louth County Council	53.77	River Type 12	54.0460675	-6.5367527		No	Q4	2	1		21/06/2018	2018		Few												Few	Few						Common
6	IE_NB_06C010200	CASTLETOWN_020	CASTLETOWN	RS06C010200	Ford's Bridge	Louth County Council	18.91	River Type 22	54.0274702	-6.4614739			Q3				06/09/2012	2012										Few					Few							Common		Dominant
6	IE_NB_06C010200	CASTLETOWN_020	CASTLETOWN	RS06C010200	Ford's Bridge	Louth County Council	18.91	River Type 22	54.0274702	-6.4614739	Riffle Glide Pool	Yes	Q3-4	2	1		02/06/2015	2015										Few				Few			Few					Common		Dominant
6	IE_NB_06C010200	CASTLETOWN_020	CASTLETOWN	RS06C010200	Ford's Bridge	Louth County Council	18.91	River Type 22	54.0274702	-6.4614739	Riffle Glide Pool	No	Q4	2	3		25/06/2018	2018														Few			Few				Common
6	IE_NB_06C010310	CASTLETOWN_030	CASTLETOWN	RS06C010310	Weir d/s John's Br	Louth County Council	3.92	River Type 22	54.0244223	-6.42389		Yes	Q4	2	1		18/06/2009	2009														Few			Few					Common
6	IE_NB_06C010310	CASTLETOWN_030	CASTLETOWN	RS06C010310	Weir d/s John's Br	Louth County Council	3.92	River Type 22	54.0244223	-6.42389			Q3-4				06/09/2012	2012		Few								Few					Single							Common		Dominant
6	IE_NB_06C010310	CASTLETOWN_030	CASTLETOWN	RS06C010310	Weir d/s John's Br	Louth County Council	3.92	River Type 22	54.0244223	-6.42389	Lowland Meandering	Yes	Q3-4	2	1	5	02/06/2015	2015														Few							Dominant
6	IE_NB_06C010310	CASTLETOWN_030	CASTLETOWN	RS06C010310	Weir d/s John's Br	Louth County Council	3.92	River Type 22	54.0244223	-6.42389	Riffle Glide Pool		Q3-4	2	2		25/06/2018	2018							Few			Few				Few			Few				Dominant
6	UKGBNI1NB060608235	CULLY WATER_010	CULLY WATER	RS06C020200	Br u/s Kilcurry R confl	Louth County Council	10.9	River Type 22	54.0372346	-6.4375114			Q4	2	2		24/06/2009	2009														Few								Few
6	UKGBNI1NB060608235	CULLY WATER_010	CULLY WATER	RS06C020200	Br u/s Kilcurry R confl	Louth County Council	10.9	River Type 22	54.0372346	-6.4375114			Q4				06/09/2012	2012										Few					Few							Few		Dominant
6	UKGBNI1NB060608235	CULLY WATER_010	CULLY WATER	RS06C020200	Br u/s Kilcurry R confl	Louth County Council	10.9	River Type 22	54.0372346	-6.4375114	Riffle Glide Pool	Yes	Q4	2	1		02/06/2015	2015										Few				Few	Few							Dominant		Dominant
6	UKGBNI1NB060608235	CULLY WATER_010	CULLY WATER	RS06C020200	Br u/s Kilcurry R confl	Louth County Council	10.9	River Type 22	54.0372346	-6.4375114	Riffle Glide Pool	No	Q4	2	1		25/06/2018	2018														Few	Single		Few				Common
6	UKGBNI1NB060603027	COUNTY WATER_010	COUNTY WATER	RS06C030050	County Br	Monaghan County Council	97.65	River Type 12	54.1631284	-6.633336			Q4	2	1		23/09/2009	2009														Few								Common
6	UKGBNI1NB060603027	COUNTY WATER_010	COUNTY WATER	RS06C030050	County Br	Monaghan County Council	97.65	River Type 12	54.1631284	-6.633336			Q4				04/09/2012	2012		Single													Few									Dominant
6	UKGBNI1NB060603027	COUNTY WATER_010	COUNTY WATER	RS06C030050	County Br	Monaghan County Council	97.65	River Type 12	54.1631284	-6.633336	Cascade Step Pool (CSP)	No	Q4	2	1		28/07/2015	2015		Single												Few	Single						Dominant			Dominant
6	UKGBNI1NB060603027	COUNTY WATER_010	COUNTY WATER	RS06C030050	County Br	Monaghan County Council	97.65	River Type 12	54.1631284	-6.633336			Q4	2	1		20/06/2018	2018														Few	Few						Common
6	UKGBNI1NB060603027	COUNTY WATER_010	COUNTY WATER	RS06C030080	COUNTY WATER - Mullaghduff	Monaghan County Council	97.65	River Type 12	54.1301693	-6.6466816	Riffle Glide Pool		Q3	2	1		03/06/2015	2015		Few														Few								Dominant
6	UKGBNI1NB060603027	COUNTY WATER_010	COUNTY WATER	RS06C030080	COUNTY WATER - Mullaghduff	Monaghan County Council	97.65	River Type 12	54.1301693	-6.6466816	Riffle Glide Pool		Q3-4	2	1		20/06/2018	2018														Few			Few				Numerous
6	UKGBNI1NB060603027	COUNTY WATER_010	COUNTY WATER	RS06C030170	Br u/s Wallace's Br	Monaghan County Council	97.65	River Type 12	54.1362518	-6.6901871			Q3-4	2			23/09/2009	2009														Few								Numerous
6	UKGBNI1NB060603027	COUNTY WATER_010	COUNTY WATER	RS06C030170	Br u/s Wallace's Br	Monaghan County Council	97.65	River Type 12	54.1362518	-6.6901871			Q3-4				04/09/2012	2012		Few				Single								Few	Few									Common
6	UKGBNI1NB060603027	COUNTY WATER_010	COUNTY WATER	RS06C030170	Br u/s Wallace's Br	Monaghan County Council	97.65	River Type 12	54.1362518	-6.6901871	Riffle Glide Pool	No	Q3	2	1		05/08/2015	2015		Few						Few						Few	Single									Common
6	UKGBNI1NB060603027	COUNTY WATER_010	COUNTY WATER	RS06C030170	Br u/s Wallace's Br	Monaghan County Council	97.65	River Type 12	54.1362518	-6.6901871	Riffle Glide Pool	No	Q4	2	2		21/06/2018	2018		Few												Few	Few						Numerous
6	IE_NB_06F010200	FANE_010	CARRICKASLANE LOUGH STREAM	RS06C040115	CARRICKASLANE LOUGH STREAM - Br at Mill to N of Carrickaslane	Monaghan County Council	88.88	River Type 12	54.1624439	-6.7658573			Q3	2	1		23/09/2009	2009																						Numerous
6	IE_NB_06F010200	FANE_010	CARRICKASLANE LOUGH STREAM	RS06C040115	CARRICKASLANE LOUGH STREAM - Br at Mill to N of Carrickaslane	Monaghan County Council	88.88	River Type 12	54.1624439	-6.7658573			Q3				04/09/2012	2012										Single														Dominant
6	IE_NB_06F010200	FANE_010	CARRICKASLANE LOUGH STREAM	RS06C040115	CARRICKASLANE LOUGH STREAM - Br at Mill to N of Carrickaslane	Monaghan County Council	88.88	River Type 12	54.1624439	-6.7658573	Riffle Glide Pool		Q3	2	1		03/06/2015	2015																								Excessive
6	IE_NB_06F010200	FANE_010	CARRICKASLANE LOUGH STREAM	RS06C040115	CARRICKASLANE LOUGH STREAM - Br at Mill to N of Carrickaslane	Monaghan County Council	88.88	River Type 12	54.1624439	-6.7658573	Riffle Glide Pool		Q3	2	1		20/06/2018	2018														Few							Dominant
6	IE_NB_06D010016	DEE_010	DEE	RS06D010016	Br u/s Ervy Lough	Cavan County Council	129.66	River Type 13	53.8972594	-6.8405277			Q3-4	2	1		30/09/2009	2009																						Common
6	IE_NB_06D010016	DEE_010	DEE	RS06D010016	Br u/s Ervy Lough	Cavan County Council	129.66	River Type 13	53.8972594	-6.8405277			Q3-4				31/08/2012	2012										Few												Dominant
6	IE_NB_06D010016	DEE_010	DEE	RS06D010016	Br u/s Ervy Lough	Cavan County Council	129.66	River Type 13	53.8972594	-6.8405277	Riffle Glide Pool		Q4	2	1		09/06/2015	2015										Few
6	IE_NB_06D010016	DEE_010	DEE	RS06D010016	Br u/s Ervy Lough	Cavan County Council	129.66	River Type 13	53.8972594	-6.8405277	Riffle Glide Pool	No	Q4	2	1		19/07/2018	2018																					Few
6	IE_NB_06D010035	DEE_020	DEE	RS06D010035	Br u/s Whitewood L	Meath County Council	50.61	River Type 32	53.8455388	-6.7908492			Q3-4	2	1		30/09/2009	2009							Few							Common	Few							Numerous
6	IE_NB_06D010035	DEE_020	DEE	RS06D010035	Br u/s Whitewood L	Meath County Council	50.61	River Type 32	53.8455388	-6.7908492			Q3				31/08/2012	2012		Single						Single							Single							Numerous
6	IE_NB_06D010035	DEE_020	DEE	RS06D010035	Br u/s Whitewood L	Meath County Council	50.61	River Type 32	53.8455388	-6.7908492	Riffle Glide Pool		Q3	2	1		09/06/2015	2015		Few					Few															Dominant
6	IE_NB_06D010035	DEE_020	DEE	RS06D010035	Br u/s Whitewood L	Meath County Council	50.61	River Type 32	53.8455388	-6.7908492	Riffle Glide Pool	No	Q3-4	2	2		18/07/2018	2018						Few									Few		Few				Few
6	IE_NB_06D010150	DEE_030	DEE	RS06D010150	Wooden Br West of Nobber Br	Meath County Council	49.31	River Type 32	53.8241533	-6.7573572			Q3				31/08/2012	2012		Single				Few		Few						Single	Single							Few
6	IE_NB_06D010150	DEE_030	DEE	RS06D010150	Wooden Br West of Nobber Br	Meath County Council	49.31	River Type 32	53.8241533	-6.7573572	Riffle Glide Pool	No	Q3-4	2	1		19/07/2018	2018														Few							Few
6	IE_NB_06M460800	MOYNAGH_040	DEE	RS06D010200	Deegvee Br	Meath County Council	46.05	River Type 32	53.8150449	-6.7398486			Q3	2	1		01/10/2009	2009		Few				Few	Few							Common								Numerous
6	IE_NB_06M460800	MOYNAGH_040	DEE	RS06D010200	Deegvee Br	Meath County Council	46.05	River Type 32	53.8150449	-6.7398486			Q3-4				31/08/2012	2012						Single								Single	Few							Excessive
6	IE_NB_06M460800	MOYNAGH_040	DEE	RS06D010200	Deegvee Br	Meath County Council	46.05	River Type 32	53.8150449	-6.7398486	Riffle Glide Pool		Q3-4	2	1		09/06/2015	2015						Few								Few	Few							Numerous
6	IE_NB_06M460800	MOYNAGH_040	DEE	RS06D010200	Deegvee Br	Meath County Council	46.05	River Type 32	53.8150449	-6.7398486	Riffle Glide Pool	No	Q3	2	2		28/09/2018	2018																	Few				Dominant
6	IE_NB_06D010360	DEE_040	DEE	RS06D010360	Br SE of Rockfield Ho	Meath County Council	38.81	River Type 32	53.8124345	-6.6775658			Q4	4	1		01/10/2009	2009										Few				Numerous	Few	Few						Numerous
6	IE_NB_06D010360	DEE_040	DEE	RS06D010360	Br SE of Rockfield Ho	Meath County Council	38.81	River Type 32	53.8124345	-6.6775658			Q4				31/08/2012	2012								Single		Single				Few	Few							Common
6	IE_NB_06D010360	DEE_040	DEE	RS06D010360	Br SE of Rockfield Ho	Meath County Council	38.81	River Type 32	53.8124345	-6.6775658	Riffle Glide Pool		Q4	2	1		10/06/2015	2015								Few		Single				Few	Few							Common
6	IE_NB_06D010360	DEE_040	DEE	RS06D010360	Br SE of Rockfield Ho	Meath County Council	38.81	River Type 32	53.8124345	-6.6775658	Riffle Glide Pool	No	Q4	2	2		19/07/2018	2018									Single					Few			Few				Few
6	IE_NB_06D010600	DEE_050	DEE	RS06D010600	Burley Br.	Meath County Council	26.08	River Type 31	53.8483072	-6.5945312			Q4	2	1		01/10/2009	2009		Few												Few	Few		Few					Dominant
6	IE_NB_06D010600	DEE_050	DEE	RS06D010600	Burley Br.	Meath County Council	26.08	River Type 31	53.8483072	-6.5945312			Q4			5	04/10/2011	2011		Few					Few			Few				Few			Few				Numerous
6	IE_NB_06D010600	DEE_050	DEE	RS06D010600	Burley Br.	Meath County Council	26.08	River Type 31	53.8483072	-6.5945312	Riffle Glide Pool		Q4	2	1		05/08/2015	2015		Single								Few				Few	Few							Common
6	IE_NB_06D010600	DEE_050	DEE	RS06D010600	Burley Br.	Meath County Council	26.08	River Type 31	53.8483072	-6.5945312	Riffle Glide Pool	No	Q4-5	2	1		07/08/2018	2018		Few					Few			Few				Few			Common				Common
6	IE_NB_06D010670	DEE_060	DEE	RS06D010670	1km u/s Ardee Br.	Meath County Council	22	River Type 32	53.8538061	-6.5512508			Q3				08/09/2012	2012								Single						Few			Single					Common
6	IE_NB_06D010670	DEE_060	DEE	RS06D010670	1km u/s Ardee Br.	Meath County Council	22	River Type 32	53.8538061	-6.5512508	Intermediate	No	Q2-3	2			07/08/2018	2018														Few			Few
6	IE_NB_06D010710	DEE_070	DEE	RS06D010680	Dawsons Br (Footbridge Ardee)	Louth County Council	21.28	River Type 22	53.855351	-6.5312522			Q3				08/09/2012	2012		Single								Few							Common					Numerous
6	IE_NB_06D010710	DEE_070	DEE	RS06D010680	Dawsons Br (Footbridge Ardee)	Louth County Council	21.28	River Type 22	53.855351	-6.5312522	Riffle Glide Pool	No	Q3-4	2	1		08/08/2018	2018														Few			Common				Few
6	IE_NB_06D010710	DEE_070	DEE	RS06D010710	150m d/s old Rly Br (LHS)	Louth County Council	21.28	River Type 22	53.8592119	-6.5207375			Q3	2	1		01/10/2009	2009							Few							Numerous			Few					Dominant
6	IE_NB_06D010710	DEE_070	DEE	RS06D010710	150m d/s old Rly Br (LHS)	Louth County Council	21.28	River Type 22	53.8592119	-6.5207375			Q3				04/10/2011	2011							Few							Few							Numerous
6	IE_NB_06D010710	DEE_070	DEE	RS06D010710	150m d/s old Rly Br (LHS)	Louth County Council	21.28	River Type 22	53.8592119	-6.5207375	Lowland Meandering	Yes	Q3-4	2	1		10/06/2015	2015								Few						Few								Common
6	IE_NB_06D010710	DEE_070	DEE	RS06D010710	150m d/s old Rly Br (LHS)	Louth County Council	21.28	River Type 22	53.8592119	-6.5207375	Riffle Glide Pool	No	Q3-4	2	1		07/08/2018	2018		Few															Common				Few
6	IE_NB_06D011000	DEE_080	DEE	RS06D011000	Br. At Drumcar	Louth County Council	7.56	River Type 22	53.8585896	-6.3800111			Q3-4	2	1		01/10/2009	2009							Few							Few			Common					Dominant
6	IE_NB_06D011000	DEE_080	DEE	RS06D011000	Br. At Drumcar	Louth County Council	7.56	River Type 22	53.8585896	-6.3800111			Q3				04/10/2011	2011							Few							Few			Common				Dominant
6	IE_NB_06D011000	DEE_080	DEE	RS06D011000	Br. At Drumcar	Louth County Council	7.56	River Type 22	53.8585896	-6.3800111	Riffle Glide Pool		Q3	2	1		11/06/2015	2015						Single								Few	Few							Dominant
6	IE_NB_06D011000	DEE_080	DEE	RS06D011000	Br. At Drumcar	Louth County Council	7.56	River Type 22	53.8585896	-6.3800111	Lowland Meandering		Q3-4	2	1		08/08/2018	2018																	Few				Common
6	IE_NB_06D011100	DEE_090	DEE	RS06D011100	At Williamstown House	Louth County Council	4.35	River Type 11	53.8681296	-6.367144			Q3				08/09/2012	2012								Few	Single					Few								Few
6	IE_NB_06D011100	DEE_090	DEE	RS06D011100	At Williamstown House	Louth County Council	4.35	River Type 11	53.8681296	-6.367144	Lowland Meandering	No	Q3			3	08/08/2018	2018									Single								Few				Few
6	IE_NB_06G020070	GLYDE_010	DRUMSALLAGH STREAM	RS06D070056	Br W of Drumsallagh	Cavan County Council	35.61	River Type 33	53.9212049	-6.8402197			Q4	2	1		30/09/2009	2009										Few				Few								Common
6	IE_NB_06G020070	GLYDE_010	DRUMSALLAGH STREAM	RS06D070056	Br W of Drumsallagh	Cavan County Council	35.61	River Type 33	53.9212049	-6.8402197			Q4				31/08/2012	2012										Few												Common
6	IE_NB_06G020070	GLYDE_010	DRUMSALLAGH STREAM	RS06D070056	Br W of Drumsallagh	Cavan County Council	35.61	River Type 33	53.9212049	-6.8402197			Q4	2	1		29/07/2013	2013										Few				Few							Numerous
6	IE_NB_06G020070	GLYDE_010	DRUMSALLAGH STREAM	RS06D070056	Br W of Drumsallagh	Cavan County Council	35.61	River Type 33	53.9212049	-6.8402197	Riffle Glide Pool		Q4	2	1		09/06/2015	2015																						Numerous
6	IE_NB_06G020070	GLYDE_010	DRUMSALLAGH STREAM	RS06D070056	Br W of Drumsallagh	Cavan County Council	35.61	River Type 33	53.9212049	-6.8402197	Riffle Glide Pool	No	Q4	2	1		20/08/2018	2018							Few														Few
6	IE_NB_06G020070	GLYDE_010	DRUMSALLAGH STREAM	RS06D070070	County Bridge	Cavan County Council	35.61	River Type 33	53.9213139	-6.7965105			Q4-5	2	1		30/09/2009	2009														Common	Few		Few					Few
6	IE_NB_06G020070	GLYDE_010	DRUMSALLAGH STREAM	RS06D070070	County Bridge	Cavan County Council	35.61	River Type 33	53.9213139	-6.7965105			Q3-4				02/09/2012	2012															Few							Few
6	IE_NB_06G020070	GLYDE_010	DRUMSALLAGH STREAM	RS06D070070	County Bridge	Cavan County Council	35.61	River Type 33	53.9213139	-6.7965105			Q4	2	1		29/07/2013	2013															Few						Numerous
6	IE_NB_06G020070	GLYDE_010	DRUMSALLAGH STREAM	RS06D070070	County Bridge	Cavan County Council	35.61	River Type 33	53.9213139	-6.7965105	Riffle Glide Pool		Q4	2	1		09/06/2015	2015										Few												Common
6	IE_NB_06G020070	GLYDE_010	DRUMSALLAGH STREAM	RS06D070070	County Bridge	Cavan County Council	35.61	River Type 33	53.9213139	-6.7965105	Riffle Glide Pool	No	Q4	2	1		28/08/2018	2018																	Few				Few
6	IE_NB_06F010200	FANE_010	FANE	RS06F010155	South Br Dunfelimy	Monaghan County Council	88.88	River Type 12	54.1600442	-6.8268084			Q3	2			24/10/2007	2007						Few	Few							Few								Dominant
6	IE_NB_06F010200	FANE_010	FANE	RS06F010155	South Br Dunfelimy	Monaghan County Council	88.88	River Type 12	54.1600442	-6.8268084			Q3	2	1		23/09/2009	2009							Few							Few			Few					Dominant
6	IE_NB_06F010200	FANE_010	FANE	RS06F010155	South Br Dunfelimy	Monaghan County Council	88.88	River Type 12	54.1600442	-6.8268084			Q3				04/09/2012	2012										Few					Few									Numerous
6	IE_NB_06F010200	FANE_010	FANE	RS06F010155	South Br Dunfelimy	Monaghan County Council	88.88	River Type 12	54.1600442	-6.8268084	Riffle Glide Pool		Q3	2	1		03/06/2015	2015										Few					Few									Excessive
6	IE_NB_06F010200	FANE_010	FANE	RS06F010155	South Br Dunfelimy	Monaghan County Council	88.88	River Type 12	54.1600442	-6.8268084	Riffle Glide Pool		Q3	2	1		20/06/2018	2018										Few							Few					Excessive
6	IE_NB_06F010200	FANE_010	FANE	RS06F010200	Derrycreevy Br	Monaghan County Council	88.88	River Type 12	54.1285205	-6.7339648			Q3-4	2	1		23/09/2009	2009																	Few					Dominant
6	IE_NB_06F010200	FANE_010	FANE	RS06F010200	Derrycreevy Br	Monaghan County Council	88.88	River Type 12	54.1285205	-6.7339648			Q3				04/09/2012	2012		Few				Few		Single						Few	Single									Numerous
6	IE_NB_06F010200	FANE_010	FANE	RS06F010200	Derrycreevy Br	Monaghan County Council	88.88	River Type 12	54.1285205	-6.7339648	Lowland Meandering	Yes	Q3	2	1		03/06/2015	2015		Few				Few		Few		Few				Few	Few									Dominant
6	IE_NB_06F010200	FANE_010	FANE	RS06F010200	Derrycreevy Br	Monaghan County Council	88.88	River Type 12	54.1285205	-6.7339648			Q3-4			5	18/06/2018	2018																	Few		Few		Few						Single
6	UKGBNI1NB060608250	FANE_030	FANE	RS06F010400	Ballynacarry Br	Monaghan County Council	88.13	River Type 11	54.069062	-6.6633665			Q3	2	1		23/09/2009	2009							Few			Few					Few							Dominant
6	UKGBNI1NB060608250	FANE_030	FANE	RS06F010400	Ballynacarry Br	Monaghan County Council	88.13	River Type 11	54.069062	-6.6633665			Q3				04/09/2012	2012		Few																						Few
6	UKGBNI1NB060608250	FANE_030	FANE	RS06F010400	Ballynacarry Br	Monaghan County Council	88.13	River Type 11	54.069062	-6.6633665	Riffle Glide Pool		Q3	2	1		04/06/2015	2015								Few		Few					Few									Dominant
6	UKGBNI1NB060608250	FANE_030	FANE	RS06F010400	Ballynacarry Br	Monaghan County Council	88.13	River Type 11	54.069062	-6.6633665	Riffle Glide Pool	No	Q3	2	1		21/06/2018	2018		Few															Few				Common
6	UKGBNI1NB060608249	FANE_040	FANE	RS06F010500	FANE - Magoney Br	Monaghan County Council	47.39	River Type 22	54.0283732	-6.6143846	Lowland Meandering		Q4	2	1		04/06/2015	2015								Few		Few					Single						Dominant
6	UKGBNI1NB060608249	FANE_040	FANE	RS06F010500	FANE - Magoney Br	Monaghan County Council	47.39	River Type 22	54.0283732	-6.6143846	Riffle Glide Pool	No	Q4	2	1		21/06/2018	2018		Few								Few				Few	Few		Few				Numerous
6	UKGBNI1NB060608249	FANE_040	FANE	RS06F010650	Br. In Inniskeen	Monaghan County Council	47.39	River Type 22	54.0043629	-6.5788107			Q4	2	1		25/09/2009	2009										Few					Few		Few				Common
6	UKGBNI1NB060608249	FANE_040	FANE	RS06F010650	Br. In Inniskeen	Monaghan County Council	47.39	River Type 22	54.0043629	-6.5788107			Q4				06/09/2012	2012		Single								Common				Single	Few		Single							Common
6	UKGBNI1NB060608249	FANE_040	FANE	RS06F010650	Br. In Inniskeen	Monaghan County Council	47.39	River Type 22	54.0043629	-6.5788107	Riffle Glide Pool		Q4-5	2	1		04/06/2015	2015														Few							Dominant
6	UKGBNI1NB060608249	FANE_040	FANE	RS06F010650	Br. In Inniskeen	Monaghan County Council	47.39	River Type 22	54.0043629	-6.5788107	Riffle Glide Pool	No	Q4-5	2	1		25/06/2018	2018										Few					Few		Few					Common
6	IE_NB_06F010900	FANE_050	FANE	RS06F010900	Stephenstown Bridge	Louth County Council	6.27	River Type 11	53.9534472	-6.4557546			Q4	5			25/09/2009	2009														Few			Few					Dominant
6	IE_NB_06F010900	FANE_050	FANE	RS06F010900	Stephenstown Bridge	Louth County Council	6.27	River Type 11	53.9534472	-6.4557546			Q4				08/09/2012	2012						Single				Common				Single	Few									Numerous
6	IE_NB_06F010900	FANE_050	FANE	RS06F010900	Stephenstown Bridge	Louth County Council	6.27	River Type 11	53.9534472	-6.4557546	Lowland Meandering		Q4	2	1	5	04/06/2015	2015														Few	Few						Dominant
6	IE_NB_06F010900	FANE_050	FANE	RS06F010900	Stephenstown Bridge	Louth County Council	6.27	River Type 11	53.9534472	-6.4557546	Riffle Glide Pool	No	Q4	2	1		16/07/2018	2018														Few			Few				Common
6	UKGBNI1NB060608247	FLURRY_010	FLURRY	RS06F020100	Flurry Br	Louth County Council	93.86	River Type 13	54.0965741	-6.3595435			Q3	2	1		24/06/2009	2009		Few												Few	Few		Few					Common
6	UKGBNI1NB060608247	FLURRY_010	FLURRY	RS06F020100	Flurry Br	Louth County Council	93.86	River Type 13	54.0965741	-6.3595435			Q3-4	2	1		28/09/2011	2011		Few					Few							Few							Numerous
6	UKGBNI1NB060608247	FLURRY_010	FLURRY	RS06F020100	Flurry Br	Louth County Council	93.86	River Type 13	54.0965741	-6.3595435	Riffle Glide Pool		Q3	2	1		07/08/2015	2015		Few						Single						Few							Numerous
6	UKGBNI1NB060608247	FLURRY_010	FLURRY	RS06F020100	Flurry Br	Louth County Council	93.86	River Type 13	54.0965741	-6.3595435	Riffle Glide Pool		Q3	2	3		07/06/2018	2018																					Common
6	UKGBNI1NB060608252	FLURRY_020	FLURRY	RS06F020300	FLURRY - Curralhir Br	Louth County Council	61.52	River Type 14	54.0673044	-6.3483238			Q3-4	2	1		28/09/2011	2011							Few							Few							Dominant
6	UKGBNI1NB060608252	FLURRY_020	FLURRY	RS06F020300	FLURRY - Curralhir Br	Louth County Council	61.52	River Type 14	54.0673044	-6.3483238	Riffle Glide Pool		Q3-4	2	1		08/06/2015	2015								Few						Few							Dominant
6	UKGBNI1NB060608252	FLURRY_020	FLURRY	RS06F020300	FLURRY - Curralhir Br	Louth County Council	61.52	River Type 14	54.0673044	-6.3483238	Riffle Glide Pool	No	Q3-4	2	2		07/06/2018	2018									Few					Few			Few				Common
6	IE_NB_06F020700	FLURRY_030	FLURRY	RS06F020700	Ballymascanlan Br	Louth County Council	4.78	River Type 24	54.0282139	-6.3495215			Q3-4	2	1		24/06/2009	2009														Few	Few							Numerous
6	IE_NB_06F020700	FLURRY_030	FLURRY	RS06F020700	Ballymascanlan Br	Louth County Council	4.78	River Type 24	54.0282139	-6.3495215			Q4	2	1		28/09/2011	2011														Few							Few
6	IE_NB_06F020700	FLURRY_030	FLURRY	RS06F020700	Ballymascanlan Br	Louth County Council	4.78	River Type 24	54.0282139	-6.3495215	Riffle Glide Pool		Q4	2	1		08/06/2015	2015														Few	Few						Common
6	IE_NB_06F020700	FLURRY_030	FLURRY	RS06F020700	Ballymascanlan Br	Louth County Council	4.78	River Type 24	54.0282139	-6.3495215	Riffle Glide Pool	No	Q3	4	2		16/07/2018	2018									Single								Few				Numerous
6	IE_NB_06G020100	GLYDE_020	GLYDE	RS06G020100	Cormey Br	Monaghan County Council	34.04	River Type 32	53.9247545	-6.7737872			Q4	2	1		30/09/2009	2009						Few								Few	Few							Common
6	IE_NB_06G020100	GLYDE_020	GLYDE	RS06G020100	Cormey Br	Monaghan County Council	34.04	River Type 32	53.9247545	-6.7737872			Q3-4				02/09/2012	2012		Single								Single				Few	Few		Few					Few
6	IE_NB_06G020100	GLYDE_020	GLYDE	RS06G020100	Cormey Br	Monaghan County Council	34.04	River Type 32	53.9247545	-6.7737872	Riffle Glide Pool	No	Q4-5	2	1		12/06/2015	2015						Single		Single		Few				Few	Single							Common
6	IE_NB_06G020100	GLYDE_020	GLYDE	RS06G020100	Cormey Br	Monaghan County Council	34.04	River Type 32	53.9247545	-6.7737872	Riffle Glide Pool	No	Q4	2	5		20/08/2018	2018							Few							Few			Few				Common
6	IE_NB_06G020100	GLYDE_020	GLYDE	RS06G020100	Cormey Br	Monaghan County Council	34.04	River Type 32	53.9247545	-6.7737872	Riffle Glide Pool		Q4	2	2		16/10/2018	2018						Few								Few			Few				Common
6	IE_NB_06G020400	GLYDE_030	GLYDE	RS06G020400	Lagan Br	Monaghan County Council	22.62	River Type 32	53.9100602	-6.6693109			Q4-5	2	1		05/10/2009	2009							Few							Few								Few
6	IE_NB_06G020400	GLYDE_030	GLYDE	RS06G020400	Lagan Br	Monaghan County Council	22.62	River Type 32	53.9100602	-6.6693109			Q4				06/09/2012	2012														Few	Few							Numerous
6	IE_NB_06G020400	GLYDE_030	GLYDE	RS06G020400	Lagan Br	Monaghan County Council	22.62	River Type 32	53.9100602	-6.6693109	Lowland Meandering		Q4-5	3			12/06/2015	2015								Few						Few								Dominant
6	IE_NB_06G020400	GLYDE_030	GLYDE	RS06G020400	Lagan Br	Monaghan County Council	22.62	River Type 32	53.9100602	-6.6693109	Riffle Glide Pool	No	Q4	2	5		16/10/2018	2018							Single			Single					Few		Few				Common
6	IE_NB_06G020500	GLYDE_040	GLYDE	RS06G020500	Aclint Br	Monaghan County Council	21.93	River Type 31	53.9243662	-6.6397115			Q4	2	1		05/10/2009	2009							Few							Few			Common					Numerous
6	IE_NB_06G020500	GLYDE_040	GLYDE	RS06G020500	Aclint Br	Monaghan County Council	21.93	River Type 31	53.9243662	-6.6397115			Q4				06/09/2012	2012								Few						Few								Numerous
6	IE_NB_06G020700	GLYDE_050	GLYDE	RS06G020600	Br W of Mullacrew	Louth County Council	17.91	River Type 21	53.9365158	-6.5642339			Q4	2	1		05/10/2009	2009														Common			Few					Dominant
6	IE_NB_06G020700	GLYDE_050	GLYDE	RS06G020600	Br W of Mullacrew	Louth County Council	17.91	River Type 21	53.9365158	-6.5642339			Q3-4				08/09/2012	2012						Few		Few						Few	Few							Numerous
6	IE_NB_06G020700	GLYDE_050	GLYDE	RS06G020600	Br W of Mullacrew	Louth County Council	17.91	River Type 21	53.9365158	-6.5642339	Lowland Meandering	Yes	Q4	3	1		12/06/2015	2015								Few						Few							Common
6	IE_NB_06G020700	GLYDE_050	GLYDE	RS06G020600	Br W of Mullacrew	Louth County Council	17.91	River Type 21	53.9365158	-6.5642339	Riffle Glide Pool	No	Q4	2	2		21/08/2018	2018						Few	Few							Few	Few		Few				Few
6	IE_NB_06G020700	GLYDE_050	GLYDE	RS06G020700	Tallanstown Br	Louth County Council	17.91	River Type 21	53.9199725	-6.5461455			Q3-4				08/09/2012	2012						Few									Few		Single					Common
6	IE_NB_06G020700	GLYDE_050	GLYDE	RS06G020700	Tallanstown Br	Louth County Council	17.91	River Type 21	53.9199725	-6.5461455	Riffle Glide Pool	No	Q3-4	2	1		21/08/2018	2018														Few			Few				Few
6	IE_NB_06G020900	GLYDE_060	GLYDE	RS06G020900	Mapastown Br.	Louth County Council	7.25	River Type 12	53.8987899	-6.4996592			Q4	2	1		05/10/2009	2009														Few								Dominant
6	IE_NB_06G020900	GLYDE_060	GLYDE	RS06G020900	Mapastown Br.	Louth County Council	7.25	River Type 12	53.8987899	-6.4996592			Q3-4				08/09/2012	2012														Few	Single		Single					Few
6	IE_NB_06G020900	GLYDE_060	GLYDE	RS06G020900	Mapastown Br.	Louth County Council	7.25	River Type 12	53.8987899	-6.4996592	Lowland Meandering		Q4			5	12/06/2015	2015										Few				Few								Dominant
6	IE_NB_06G020900	GLYDE_060	GLYDE	RS06G020900	Mapastown Br.	Louth County Council	7.25	River Type 12	53.8987899	-6.4996592	Riffle Glide Pool		Q4	2	1		05/09/2018	2018														Few			Few				Few
6	IE_NB_06G021230	GLYDE_070	GLYDE	RS06G021200	Castlebellingham Br	Louth County Council	2.56	River Type 11	53.8948434	-6.3878324			Q4	2	1		25/09/2009	2009						Few																Numerous
6	IE_NB_06G021230	GLYDE_070	GLYDE	RS06G021200	Castlebellingham Br	Louth County Council	2.56	River Type 11	53.8948434	-6.3878324			Q3-4				08/09/2012	2012									Single	Few				Few								Numerous
6	IE_NB_06G021230	GLYDE_070	GLYDE	RS06G021200	Castlebellingham Br	Louth County Council	2.56	River Type 11	53.8948434	-6.3878324	Riffle Glide Pool		Q4	2	1		12/06/2015	2015								Few	Few					Few								Numerous
6	IE_NB_06G021230	GLYDE_070	GLYDE	RS06G021200	Castlebellingham Br	Louth County Council	2.56	River Type 11	53.8948434	-6.3878324	Riffle Glide Pool	No	Q3-4	2	5		08/08/2018	2018		Few															Few				Numerous
6	IE_NB_06G021230	GLYDE_070	GLYDE	RS06G021230	200m d/s castlebellingham br.	Louth County Council	2.56	River Type 11	53.8963763	-6.3845899			Q3-4				08/09/2012	2012									Single													Common
6	IE_NB_06G021230	GLYDE_070	GLYDE	RS06G021230	200m d/s castlebellingham br.	Louth County Council	2.56	River Type 11	53.8963763	-6.3845899	Lowland Meandering	No	Q3-4	2			08/08/2018	2018																	Few				Numerous
6	UKGBNI1NB060608248	GENTLE OWEN'S LAKE STREAM_010	GENTLE OWEN'S LAKE STREAM	RS06G040040	Br in Creaghanroe	Monaghan County Council	114.14	River Type 13	54.1670498	-6.7245055			Q4	2	1		23/09/2009	2009							Excessive			Excessive				Few	Excessive		Excessive					Numerous
6	UKGBNI1NB060608248	GENTLE OWEN'S LAKE STREAM_010	GENTLE OWEN'S LAKE STREAM	RS06G040040	Br in Creaghanroe	Monaghan County Council	114.14	River Type 13	54.1670498	-6.7245055			Q4				04/09/2012	2012														Single	Few									Excessive
6	UKGBNI1NB060608248	GENTLE OWEN'S LAKE STREAM_010	GENTLE OWEN'S LAKE STREAM	RS06G040040	Br in Creaghanroe	Monaghan County Council	114.14	River Type 13	54.1670498	-6.7245055	Riffle Glide Pool		Q4	2	1		03/06/2015	2015														Few	Few									Dominant
6	UKGBNI1NB060608248	GENTLE OWEN'S LAKE STREAM_010	GENTLE OWEN'S LAKE STREAM	RS06G040040	Br in Creaghanroe	Monaghan County Council	114.14	River Type 13	54.1670498	-6.7245055			Q4	2	2		20/06/2018	2018														Few							Common
6	UKGBNI1NB060608253	GENTLE OWEN'S LAKE STREAM_020	GENTLE OWEN'S LAKE STREAM	RS06G040100	Br 1.5km d/s Muckno Mill L	Monaghan County Council	91.82	River Type 12	54.1346663	-6.7237105			Q3-4	2	1		23/09/2009	2009														Few			Common					Common
6	UKGBNI1NB060608253	GENTLE OWEN'S LAKE STREAM_020	GENTLE OWEN'S LAKE STREAM	RS06G040100	Br 1.5km d/s Muckno Mill L	Monaghan County Council	91.82	River Type 12	54.1346663	-6.7237105			Q3-4				04/09/2012	2012		Single												Few	Single									Dominant
6	UKGBNI1NB060608253	GENTLE OWEN'S LAKE STREAM_020	GENTLE OWEN'S LAKE STREAM	RS06G040100	Br 1.5km d/s Muckno Mill L	Monaghan County Council	91.82	River Type 12	54.1346663	-6.7237105	Riffle Glide Pool		Q3-4	2	1		03/06/2015	2015		Few												Few										Dominant
6	UKGBNI1NB060608253	GENTLE OWEN'S LAKE STREAM_020	GENTLE OWEN'S LAKE STREAM	RS06G040100	Br 1.5km d/s Muckno Mill L	Monaghan County Council	91.82	River Type 12	54.1346663	-6.7237105	Riffle Glide Pool		Q3-4	2	1		20/06/2018	2018																	Few				Dominant
6	IE_NB_06K010100	KILLARY WATER_010	KILLARY WATER	RS06K010100	Killary Br Upper	Meath County Council	62.04	River Type 13	53.7736401	-6.6680923	Riffle Glide Pool		Q3-4	2	1		10/06/2015	2015															Few							Numerous
6	IE_NB_06K010100	KILLARY WATER_010	KILLARY WATER	RS06K010100	Killary Br Upper	Meath County Council	62.04	River Type 13	53.7736401	-6.6680923	Riffle Glide Pool	No	Q4	2	1		18/07/2018	2018																	Few					Common
6	IE_NB_06K010500	KILLARY WATER_020	KILLARY WATER	RS06K010500	SW Br u/s Dee R conflu.	Meath County Council	38.37	River Type 12	53.8110963	-6.6547893			Q3	2	1		01/10/2009	2009														Common			Few					Numerous
6	IE_NB_06K010500	KILLARY WATER_020	KILLARY WATER	RS06K010500	SW Br u/s Dee R conflu.	Meath County Council	38.37	River Type 12	53.8110963	-6.6547893			Q3				31/08/2012	2012										Single					Common		Single					Dominant
6	UKGBNI1NB060608228	KILCURRY_010	KILCURRY	RS06K020200	Br at Mill nr Falmore Hall	Louth County Council	11.1	River Type 22	54.0374219	-6.4359055			Q4	2	2		24/06/2009	2009														Few			Few					Common
6	UKGBNI1NB060608228	KILCURRY_010	KILCURRY	RS06K020200	Br at Mill nr Falmore Hall	Louth County Council	11.1	River Type 22	54.0374219	-6.4359055			Q4				06/09/2012	2012									Single	Few				Few	Few									Common
6	UKGBNI1NB060608228	KILCURRY_010	KILCURRY	RS06K020200	Br at Mill nr Falmore Hall	Louth County Council	11.1	River Type 22	54.0374219	-6.4359055	Riffle Glide Pool	Yes	Q4	2	1		02/06/2015	2015										Few					Few						Dominant
6	UKGBNI1NB060608228	KILCURRY_010	KILCURRY	RS06K020200	Br at Mill nr Falmore Hall	Louth County Council	11.1	River Type 22	54.0374219	-6.4359055	Riffle Glide Pool	No	Q4	2	1		25/06/2018	2018																	Few				Common
6	IE_NB_06K040055	KILMAINHAM (DEE)_010	KILMAINHAM (DEE)	RS06K040055	Breaky Br	Meath County Council	124.98	River Type 13	53.8705742	-6.8677181			Q4	2	1		30/09/2009	2009														Few								Common
6	IE_NB_06K040055	KILMAINHAM (DEE)_010	KILMAINHAM (DEE)	RS06K040055	Breaky Br	Meath County Council	124.98	River Type 13	53.8705742	-6.8677181			Q3-4				31/08/2012	2012								Single						Single	Few							Excessive
6	IE_NB_06K040055	KILMAINHAM (DEE)_010	KILMAINHAM (DEE)	RS06K040055	Breaky Br	Meath County Council	124.98	River Type 13	53.8705742	-6.8677181	Riffle Glide Pool		Q4	2	1		10/06/2015	2015								Few														Common
6	IE_NB_06K040055	KILMAINHAM (DEE)_010	KILMAINHAM (DEE)	RS06K040055	Breaky Br	Meath County Council	124.98	River Type 13	53.8705742	-6.8677181	Riffle Glide Pool	No	Q3-4	2	2		18/07/2018	2018														Single			Few				Few
6	IE_NB_06K040100	KILMAINHAM (DEE)_020	KILMAINHAM (DEE)	RS06K040100	Br u/s Whitewood L	Meath County Council	57.55	River Type 22	53.8457585	-6.8003293			Q4	2	1		30/09/2009	2009							Few							Few		Few	Few
6	IE_NB_06K040100	KILMAINHAM (DEE)_020	KILMAINHAM (DEE)	RS06K040100	Br u/s Whitewood L	Meath County Council	57.55	River Type 22	53.8457585	-6.8003293			Q3-4				31/08/2012	2012										Few					Single							Common
6	IE_NB_06K040100	KILMAINHAM (DEE)_020	KILMAINHAM (DEE)	RS06K040100	Br u/s Whitewood L	Meath County Council	57.55	River Type 22	53.8457585	-6.8003293	Intermediate		Q3-4	2	1		11/08/2015	2015										Few				Few								Dominant
6	IE_NB_06K040100	KILMAINHAM (DEE)_020	KILMAINHAM (DEE)	RS06K040100	Br u/s Whitewood L	Meath County Council	57.55	River Type 22	53.8457585	-6.8003293	Riffle Glide Pool	No	Q3-4	2	2		18/07/2018	2018																	Common				Few										Single
6	IE_NB_06G020100	GLYDE_020	MAGHERACLOONE STREAM	RS06M010096	Br N of Lisnakeeny	Monaghan County Council	34.04	River Type 32	53.9387656	-6.7876928			Q4	2	1		30/09/2009	2009																						Numerous
6	IE_NB_06G020100	GLYDE_020	MAGHERACLOONE STREAM	RS06M010096	Br N of Lisnakeeny	Monaghan County Council	34.04	River Type 32	53.9387656	-6.7876928			Q4				02/09/2012	2012														Few								Dominant
6	IE_NB_06G020100	GLYDE_020	MAGHERACLOONE STREAM	RS06M010096	Br N of Lisnakeeny	Monaghan County Council	34.04	River Type 32	53.9387656	-6.7876928	Intermediate		Q4	2	1		10/06/2015	2015														Few			Few					Dominant
6	IE_NB_06G020100	GLYDE_020	MAGHERACLOONE STREAM	RS06M010096	Br N of Lisnakeeny	Monaghan County Council	34.04	River Type 32	53.9387656	-6.7876928	Riffle Glide Pool	No	Q4-5	2	1		22/08/2018	2018							Few								Few						Few
6	IE_NB_06P010110	PROULES_010	PROULES	RS06P010100	Br W of Old Workhouse	Monaghan County Council	37.72	River Type 33	53.9788361	-6.7305369			Q4				02/09/2012	2012										Single					Few							Dominant
6	IE_NB_06P010110	PROULES_010	PROULES	RS06P010100	Br W of Old Workhouse	Monaghan County Council	37.72	River Type 33	53.9788361	-6.7305369	Riffle Glide Pool	No	Q4	3	1		22/08/2018	2018															Few		Few				Common
6	IE_NB_06P010110	PROULES_010	PROULES	RS06P010110	500m d/s Dry Br (d/s St 0100)	Monaghan County Council	37.72	River Type 33	53.9779505	-6.7232772			Q4	2	1		29/07/2009	2009		Few												Few			Few					Few
6	IE_NB_06P010110	PROULES_010	PROULES	RS06P010110	500m d/s Dry Br (d/s St 0100)	Monaghan County Council	37.72	River Type 33	53.9779505	-6.7232772			Q4				02/09/2012	2012										Few				Single	Single							Numerous
6	IE_NB_06P010110	PROULES_010	PROULES	RS06P010110	500m d/s Dry Br (d/s St 0100)	Monaghan County Council	37.72	River Type 33	53.9779505	-6.7232772	Riffle Glide Pool		Q4	2	1		04/06/2015	2015														Few	Single							Numerous
6	IE_NB_06P010110	PROULES_010	PROULES	RS06P010110	500m d/s Dry Br (d/s St 0100)	Monaghan County Council	37.72	River Type 33	53.9779505	-6.7232772	Riffle Glide Pool	No	Q3-4	4	5		22/08/2018	2018						Few								Few							Dominant
6	IE_NB_06P010300	PROULES_020	PROULES	RS06P010300	Just u/s Lough Naglack	Monaghan County Council	26.33	River Type 31	53.9659382	-6.7041375			Q2-3				02/09/2012	2012						Few								Few								Few
6	IE_NB_06P010300	PROULES_020	PROULES	RS06P010300	Just u/s Lough Naglack	Monaghan County Council	26.33	River Type 31	53.9659382	-6.7041375	Riffle Glide Pool		Q3	2			22/08/2018	2018		Few				Few								Few			Few				Common
6	IE_NB_06P010600	PROULES_030	PROULES	RS06P010500	Ballymackney Br.	Monaghan County Council	24.54	River Type 31	53.9594645	-6.6624141			Q3-4				02/09/2012	2012						Few				Single				Few			Single		Single			Common
6	IE_NB_06P010600	PROULES_030	PROULES	RS06P010600	Br at Killanny	Monaghan County Council	24.54	River Type 31	53.9507186	-6.638011			Q3-4	2	1		30/07/2009	2009							Few							Few	Few							Dominant
6	IE_NB_06P010600	PROULES_030	PROULES	RS06P010600	Br at Killanny	Monaghan County Council	24.54	River Type 31	53.9507186	-6.638011			Q3-4				02/09/2012	2012		Single				Single				Common												Common
6	IE_NB_06P010600	PROULES_030	PROULES	RS06P010600	Br at Killanny	Monaghan County Council	24.54	River Type 31	53.9507186	-6.638011	Riffle Glide Pool		Q3	2	1		04/06/2015	2015		Single				Few				Few				Few								Dominant
6	IE_NB_06P010600	PROULES_030	PROULES	RS06P010600	Br at Killanny	Monaghan County Council	24.54	River Type 31	53.9507186	-6.638011	Riffle Glide Pool	No	Q4	2	1		22/08/2018	2018							Few			Few				Few			Few				Few
6	IE_NB_06R030260	ROSSDREENAGH STREAM_010	ROSSDREENAGH STREAM	RS06R030260	Rossdreenagh - SW of Capragh Lough	Monaghan County Council	34.24	River Type 32	53.996023	-6.68719	Riffle Glide Pool		Q3-4	2	1		04/06/2015	2015														Few
6	IE_NB_06R030260	ROSSDREENAGH STREAM_010	ROSSDREENAGH STREAM	RS06R030260	Rossdreenagh - SW of Capragh Lough	Monaghan County Council	34.24	River Type 32	53.996023	-6.68719	Riffle Glide Pool	No	Q3-4	2	1		21/08/2018	2018															Few		Few				Common
6	IE_NB_06R030400	ROSSDREENAGH STREAM_020	ROSSDREENAGH STREAM	RS06R030370	06R030300	Monaghan County Council	26.54	River Type 32	53.9783635	-6.6747925	Riffle Glide Pool		Q3-4	2	1		04/06/2015	2015														Few							Dominant
6	IE_NB_06R030400	ROSSDREENAGH STREAM_020	ROSSDREENAGH STREAM	RS06R030370	06R030300	Monaghan County Council	26.54	River Type 32	53.9783635	-6.6747925	Riffle Glide Pool	No	Q3-4	2	1		21/08/2018	2018							Few								Few		Few				Few
6	IE_NB_06T010250	TERMONFECKIN_010	TERMONFECKIN	RS06T010350	Sandpit Br.	Louth County Council	33.27	River Type 12	53.7764362	-6.3041318			Q3	2	1		29/07/2009	2009							Few							Few	Few							Dominant
6	IE_NB_06T010250	TERMONFECKIN_010	TERMONFECKIN	RS06T010350	Sandpit Br.	Louth County Council	33.27	River Type 12	53.7764362	-6.3041318		Yes	Q3				06/10/2011	2011							Few			Few				Common	Few		Few				Numerous
6	IE_NB_06T010250	TERMONFECKIN_010	TERMONFECKIN	RS06T010350	Sandpit Br.	Louth County Council	33.27	River Type 12	53.7764362	-6.3041318	Riffle Glide Pool		Q3	2	1		11/06/2015	2015		Few						Common						Common	Few						Dominant
6	IE_NB_06T010250	TERMONFECKIN_010	TERMONFECKIN	RS06T010350	Sandpit Br.	Louth County Council	33.27	River Type 12	53.7764362	-6.3041318	Riffle Glide Pool	No	Q3	2	1		17/07/2018	2018														Few			Few					Few
6	IE_NB_06T010400	TERMONFECKIN_020	TERMONFECKIN	RS06T010400	TERMONFECKIN - Br in Termonfeckin	Louth County Council	13.97	River Type 22	53.7601539	-6.2721091		Yes	Q3				06/10/2011	2011		Common					Few			Few				Numerous	Few		Numerous				Dominant
6	IE_NB_06T010400	TERMONFECKIN_020	TERMONFECKIN	RS06T010400	TERMONFECKIN - Br in Termonfeckin	Louth County Council	13.97	River Type 22	53.7601539	-6.2721091	Riffle Glide Pool	No	Q3	2	1		11/06/2015	2015		Few						Few						Few
6	IE_NB_06T010400	TERMONFECKIN_020	TERMONFECKIN	RS06T010400	TERMONFECKIN - Br in Termonfeckin	Louth County Council	13.97	River Type 22	53.7601539	-6.2721091	Riffle Glide Pool	No	Q3-4	2	1		17/07/2018	2018																	Few				Few
6	IE_NB_06W010100	WHITE (LOUTH)_010	WHITE (LOUTH)	RS06W010040	Martinstown Br.	Louth County Council	53.42	River Type 12	53.8007266	-6.4692762			Q4	2	1		05/10/2009	2009																Few						Common
6	IE_NB_06W010100	WHITE (LOUTH)_010	WHITE (LOUTH)	RS06W010040	Martinstown Br.	Louth County Council	53.42	River Type 12	53.8007266	-6.4692762			Q4				06/10/2011	2011		Few					Few							Few	Few						Numerous
6	IE_NB_06W010100	WHITE (LOUTH)_010	WHITE (LOUTH)	RS06W010040	Martinstown Br.	Louth County Council	53.42	River Type 12	53.8007266	-6.4692762	Riffle Glide Pool		Q4	2	1		11/06/2015	2015		Few						Single						Few								Common
6	IE_NB_06W010100	WHITE (LOUTH)_010	WHITE (LOUTH)	RS06W010040	Martinstown Br.	Louth County Council	53.42	River Type 12	53.8007266	-6.4692762	Riffle Glide Pool	No	Q4	2	1		17/07/2018	2018														Few							Few
6	IE_NB_06W010100	WHITE (LOUTH)_010	WHITE (LOUTH)	RS06W010100	New Br.	Louth County Council	53.42	River Type 12	53.8098909	-6.4115599			Q4				08/09/2012	2012		Few												Few	Few							Numerous
6	IE_NB_06W010100	WHITE (LOUTH)_010	WHITE (LOUTH)	RS06W010100	New Br.	Louth County Council	53.42	River Type 12	53.8098909	-6.4115599	Riffle Glide Pool	No	Q4	2	1		17/07/2018	2018														Few							Few
6	IE_NB_06W010400	WHITE (LOUTH)_020	WHITE (LOUTH)	RS06W010200	Athclare Br	Louth County Council	18.6	River Type 12	53.8180575	-6.3920309			Q4	2	1		29/07/2009	2009															Few		Few					Dominant
6	IE_NB_06W010400	WHITE (LOUTH)_020	WHITE (LOUTH)	RS06W010200	Athclare Br	Louth County Council	18.6	River Type 12	53.8180575	-6.3920309		Yes	Q3				06/10/2011	2011														Few	Few		Few				Numerous
6	IE_NB_06W010400	WHITE (LOUTH)_020	WHITE (LOUTH)	RS06W010200	Athclare Br	Louth County Council	18.6	River Type 12	53.8180575	-6.3920309	Riffle Glide Pool		Q3	2	1		11/06/2015	2015							Few							Few	Few							Common
6	IE_NB_06W010400	WHITE (LOUTH)_020	WHITE (LOUTH)	RS06W010200	Athclare Br	Louth County Council	18.6	River Type 12	53.8180575	-6.3920309	Riffle Glide Pool	No	Q3-4	2	1		17/07/2018	2018																	Common				Few
6	IE_NB_06W010400	WHITE (LOUTH)_020	WHITE (LOUTH)	RS06W010400	500m d/s Dunleer Ry Br.	Louth County Council	18.6	River Type 12	53.8393397	-6.3933049			Q3				08/09/2012	2012		Single						Single						Single								Few
6	IE_NB_06W010400	WHITE (LOUTH)_020	WHITE (LOUTH)	RS06W010400	500m d/s Dunleer Ry Br.	Louth County Council	18.6	River Type 12	53.8393397	-6.3933049	Riffle Glide Pool	No	Q3-4	2			17/07/2018	2018																	Few				Single
6	IE_NB_06W010500	WHITE (LOUTH)_030	WHITE (LOUTH)	RS06W010500	Coneyburrow Br	Louth County Council	16.46	River Type 12	53.8423786	-6.3946076			Q3-4	2	1		29/07/2009	2009														Few			Few					Dominant
6	IE_NB_06W010500	WHITE (LOUTH)_030	WHITE (LOUTH)	RS06W010500	Coneyburrow Br	Louth County Council	16.46	River Type 12	53.8423786	-6.3946076			Q3	2	1		06/10/2011	2011														Few			Few				Numerous
6	IE_NB_06W010500	WHITE (LOUTH)_030	WHITE (LOUTH)	RS06W010500	Coneyburrow Br	Louth County Council	16.46	River Type 12	53.8423786	-6.3946076	Riffle Glide Pool	No	Q3	2	1		11/06/2015	2015														Common								Few
6	IE_NB_06W010500	WHITE (LOUTH)_030	WHITE (LOUTH)	RS06W010500	Coneyburrow Br	Louth County Council	16.46	River Type 12	53.8423786	-6.3946076	Riffle Glide Pool	No	Q3-4	2	1		18/07/2018	2018																	Common				Few
7	IE_EA_07A010020	ATHBOY_010	ATHBOY	RS07A010020	Br NW of Dogstown	Meath County Council	114.04	River Type 32	53.7294465	-7.0511259			Q4	3			17/06/2009	2009		Few				Few	Few		Few	Few				Few			Few					Common
7	IE_EA_07A010020	ATHBOY_010	ATHBOY	RS07A010020	Br NW of Dogstown	Meath County Council	114.04	River Type 32	53.7294465	-7.0511259			Q4	2	1		29/08/2012	2012																						Common
7	IE_EA_07A010020	ATHBOY_010	ATHBOY	RS07A010020	Br NW of Dogstown	Meath County Council	114.04	River Type 32	53.7294465	-7.0511259	Riffle Glide Pool		Q4	2	1		09/06/2015	2015																	Few					Few
7	IE_EA_07A010020	ATHBOY_010	ATHBOY	RS07A010020	Br NW of Dogstown	Meath County Council	114.04	River Type 32	53.7294465	-7.0511259	Lowland Meandering	No	Q3-4	2	2		26/07/2018	2018							Few			Few							Few				Numerous
7	IE_EA_07A010050	ATHBOY_020	ATHBOY	RS07A010050	Br W of Kilskeer	Meath County Council	91.66	River Type 32	53.6899003	-7.0193			Q3-4	2			24/07/2009	2009														Few			Few					Numerous
7	IE_EA_07A010050	ATHBOY_020	ATHBOY	RS07A010050	Br W of Kilskeer	Meath County Council	91.66	River Type 32	53.6899003	-7.0193			Q3-4	2			29/08/2012	2012									Few					Few			Few					Dominant
7	IE_EA_07A010050	ATHBOY_020	ATHBOY	RS07A010050	Br W of Kilskeer	Meath County Council	91.66	River Type 32	53.6899003	-7.0193	Riffle Glide Pool		Q3-4	2	1		10/06/2015	2015										Few						Few	Few					Common
7	IE_EA_07A010050	ATHBOY_020	ATHBOY	RS07A010050	Br W of Kilskeer	Meath County Council	91.66	River Type 32	53.6899003	-7.0193	Lowland Straight	No	Q3-4	2	1		26/07/2018	2018						Few	Few							Few							Few
7	IE_EA_07A010070	ATHBOY_030	ATHBOY	RS07A010070	Br W of Johnsbrook Ho	Meath County Council	80.12	River Type 31	53.6678233	-6.9781201			Q3-4	4			19/09/2012	2012		Few												Few			Few					Numerous
7	IE_EA_07A010070	ATHBOY_030	ATHBOY	RS07A010070	Br W of Johnsbrook Ho	Meath County Council	80.12	River Type 31	53.6678233	-6.9781201	Riffle Glide Pool		Q3-4	2	1		10/06/2015	2015																Few	Few					Few
7	IE_EA_07A010070	ATHBOY_030	ATHBOY	RS07A010070	Br W of Johnsbrook Ho	Meath County Council	80.12	River Type 31	53.6678233	-6.9781201	Lowland Straight		Q3-4	2	1		26/07/2018	2018										Few					Few						Few
7	IE_EA_07A010100	ATHBOY_040	ATHBOY	RS07A010100	Br nr Clonleasan Ho	Meath County Council	71.67	River Type 31	53.6582922	-6.9493409			Q4	2			27/07/2009	2009									Single								Few					Numerous
7	IE_EA_07A010100	ATHBOY_040	ATHBOY	RS07A010100	Br nr Clonleasan Ho	Meath County Council	71.67	River Type 31	53.6582922	-6.9493409			Q4				19/09/2012	2012		Few						Few						Few	Few		Few					Common
7	IE_EA_07A010100	ATHBOY_040	ATHBOY	RS07A010100	Br nr Clonleasan Ho	Meath County Council	71.67	River Type 31	53.6582922	-6.9493409	Riffle Glide Pool		Q4	2	1		17/06/2015	2015																Few	Few				Few
7	IE_EA_07A010100	ATHBOY_040	ATHBOY	RS07A010100	Br nr Clonleasan Ho	Meath County Council	71.67	River Type 31	53.6582922	-6.9493409	Lowland Straight	No	Q4	2	1		26/07/2018	2018														Few			Few				Numerous
7	IE_EA_07A010300	ATHBOY_050	ATHBOY	RS07A010300	Br 2km SE of Athboy	Meath County Council	62.01	River Type 31	53.6097587	-6.8997033			Q3-4				24/07/2009	2009		Few															Few				Excessive
7	IE_EA_07A010300	ATHBOY_050	ATHBOY	RS07A010300	Br 2km SE of Athboy	Meath County Council	62.01	River Type 31	53.6097587	-6.8997033			Q3-4	3	2		19/09/2012	2012		Few																				Excessive
7	IE_EA_07A010300	ATHBOY_050	ATHBOY	RS07A010300	Br 2km SE of Athboy	Meath County Council	62.01	River Type 31	53.6097587	-6.8997033	Riffle Glide Pool		Q3-4	2	1		10/06/2015	2015																	Few				Numerous
7	IE_EA_07A010300	ATHBOY_050	ATHBOY	RS07A010300	Br 2km SE of Athboy	Meath County Council	62.01	River Type 31	53.6097587	-6.8997033	Lowland Straight	No	Q3-4	2	1		26/07/2018	2018							Few							Few							Numerous
7	IE_EA_07A010500	ATHBOY_060	ATHBOY	RS07A010400	Tremblestown Br	Meath County Council	53.67	River Type 31	53.5638387	-6.8595285			Q3-4			4	20/09/2012	2012									Few					Few			Few					Few
7	IE_EA_07A010500	ATHBOY_060	ATHBOY	RS07A010500	Kilnagross Br	Meath County Council	53.67	River Type 31	53.5543562	-6.8371097			Q3-4	2			23/07/2009	2009								Few						Few	Few		Few					Excessive
7	IE_EA_07A010500	ATHBOY_060	ATHBOY	RS07A010500	Kilnagross Br	Meath County Council	53.67	River Type 31	53.5543562	-6.8371097			Q3-4	2			20/09/2012	2012								Few						Few			Few					Numerous
7	IE_EA_07A010500	ATHBOY_060	ATHBOY	RS07A010500	Kilnagross Br	Meath County Council	53.67	River Type 31	53.5543562	-6.8371097	Lowland Meandering	No	Q3-4	2	1		17/06/2015	2015										Few						Few	Few				Few
7	IE_EA_07A010500	ATHBOY_060	ATHBOY	RS07A010500	Kilnagross Br	Meath County Council	53.67	River Type 31	53.5543562	-6.8371097	Lowland Straight	No	Q4	2	1		08/08/2018	2018							Few							Few	Few		Few				Common
7	IE_EA_07B010100	BLACKWATER (KELLS)_010	BLACKWATER (KELLS)	RS07B010100	Br 2km NE of Bailieborough	Cavan County Council	149.45	River Type 12	53.9281688	-6.9387904			Q4	3			08/07/2009	2009								Single		Few				Few	Few		Few					Numerous									Single
7	IE_EA_07B010100	BLACKWATER (KELLS)_010	BLACKWATER (KELLS)	RS07B010100	Br 2km NE of Bailieborough	Cavan County Council	149.45	River Type 12	53.9281688	-6.9387904			Q4	2	2		26/06/2012	2012														Few	Few		Few					Common
7	IE_EA_07B010100	BLACKWATER (KELLS)_010	BLACKWATER (KELLS)	RS07B010100	Br 2km NE of Bailieborough	Cavan County Council	149.45	River Type 12	53.9281688	-6.9387904	Riffle Glide Pool	Unknown	Q4	2	1		02/06/2015	2015																Few					Common
7	IE_EA_07B010100	BLACKWATER (KELLS)_010	BLACKWATER (KELLS)	RS07B010100	Br 2km NE of Bailieborough	Cavan County Council	149.45	River Type 12	53.9281688	-6.9387904	Lowland Straight	No	Q4	2	1		14/08/2018	2018														Few							Few
7	IE_EA_07B010170	BLACKWATER (KELLS)_020	BLACKWATER (KELLS)	RS07B010170	Br at Drumbannon	Cavan County Council	136.03	River Type 12	53.9269476	-6.9688957			Q3	2			08/07/2009	2009								Few						Dominant			Few					Common
7	IE_EA_07B010170	BLACKWATER (KELLS)_020	BLACKWATER (KELLS)	RS07B010170	Br at Drumbannon	Cavan County Council	136.03	River Type 12	53.9269476	-6.9688957			Q3-4	2	1		26/06/2012	2012								Few						Numerous	Few							Numerous
7	IE_EA_07B010170	BLACKWATER (KELLS)_020	BLACKWATER (KELLS)	RS07B010170	Br at Drumbannon	Cavan County Council	136.03	River Type 12	53.9269476	-6.9688957	Riffle Glide Pool		Q3-4	2	1		16/06/2015	2015					Few											Few	Few
7	IE_EA_07B010170	BLACKWATER (KELLS)_020	BLACKWATER (KELLS)	RS07B010170	Br at Drumbannon	Cavan County Council	136.03	River Type 12	53.9269476	-6.9688957	Lowland Straight	No	Q2-3	2	1		14/08/2018	2018						Common	Few							Common			Few				Common
7	IE_EA_07B010280	BLACKWATER (KELLS)_030	BLACKWATER (KELLS)	RS07B010200	Br at XRds SW (u/s) Castle L	Cavan County Council	130.81	River Type 12	53.9342046	-6.9799342			Q2-3	2			26/06/2012	2012														Numerous					Few
7	IE_EA_07B010280	BLACKWATER (KELLS)_030	BLACKWATER (KELLS)	RS07B010280	3rd Br d/s Castle L	Cavan County Council	130.81	River Type 12	53.9281929	-6.996518			Q3	2	2		27/06/2012	2012										Few				Few	Few							Numerous
7	IE_EA_07B010280	BLACKWATER (KELLS)_030	BLACKWATER (KELLS)	RS07B010280	3rd Br d/s Castle L	Cavan County Council	130.81	River Type 12	53.9281929	-6.996518	Riffle Glide Pool	No	Q3	2	1		02/06/2015	2015																Few					Few
7	IE_EA_07B010280	BLACKWATER (KELLS)_030	BLACKWATER (KELLS)	RS07B010280	3rd Br d/s Castle L	Cavan County Council	130.81	River Type 12	53.9281929	-6.996518	Lowland Straight	No	Q3	2	1		14/08/2018	2018														Few							Few
7	IE_EA_07B010420	BLACKWATER (KELLS)_040	BLACKWATER (KELLS)	RS07B010420	Br d/s Parker's Br	Cavan County Council	118.4	River Type 12	53.9157546	-7.0318423			Q3-4	3			08/07/2009	2009														Few	Few							Common									Few
7	IE_EA_07B010420	BLACKWATER (KELLS)_040	BLACKWATER (KELLS)	RS07B010420	Br d/s Parker's Br	Cavan County Council	118.4	River Type 12	53.9157546	-7.0318423			Q3-4	3			27/06/2012	2012						Few				Common					Few							Excessive									Single
7	IE_EA_07B010420	BLACKWATER (KELLS)_040	BLACKWATER (KELLS)	RS07B010420	Br d/s Parker's Br	Cavan County Council	118.4	River Type 12	53.9157546	-7.0318423	Cascade Step Pool (CSP)	No	Q3-4	2			02/06/2015	2015																Few	Few				Numerous
7	IE_EA_07B010420	BLACKWATER (KELLS)_040	BLACKWATER (KELLS)	RS07B010420	Br d/s Parker's Br	Cavan County Council	118.4	River Type 12	53.9157546	-7.0318423	Lowland Straight	No	Q3-4	2	1		14/08/2018	2018																					Few
7	IE_EA_07B010500	BLACKWATER (KELLS)_050	BLACKWATER (KELLS)	RS07B010500	Br in Killinkere	Cavan County Council	104.05	River Type 11	53.887601	-7.0714328			Q4	3			08/07/2009	2009																						Common									Few
7	IE_EA_07B010500	BLACKWATER (KELLS)_050	BLACKWATER (KELLS)	RS07B010500	Br in Killinkere	Cavan County Council	104.05	River Type 11	53.887601	-7.0714328			Q4	3			27/06/2012	2012						Few								Few								Numerous
7	IE_EA_07B010500	BLACKWATER (KELLS)_050	BLACKWATER (KELLS)	RS07B010500	Br in Killinkere	Cavan County Council	104.05	River Type 11	53.887601	-7.0714328	Riffle Glide Pool	Unknown	Q4	2			02/06/2015	2015																															Single
7	IE_EA_07B010500	BLACKWATER (KELLS)_050	BLACKWATER (KELLS)	RS07B010500	Br in Killinkere	Cavan County Council	104.05	River Type 11	53.887601	-7.0714328	Lowland Straight	No	Q4	2	1		14/08/2018	2018														Few							Few										Few
7	IE_EA_07B010600	BLACKWATER (KELLS)_060	BLACKWATER (KELLS)	RS07B010600	Stramaquerty Br (nr Drumagolan)	Cavan County Council	101.28	River Type 12	53.8748333	-7.0954112			Q4	3			08/07/2009	2009						Few								Few								Few
7	IE_EA_07B010600	BLACKWATER (KELLS)_060	BLACKWATER (KELLS)	RS07B010600	Stramaquerty Br (nr Drumagolan)	Cavan County Council	101.28	River Type 12	53.8748333	-7.0954112			Q4	2		2	27/06/2012	2012						Few								Few			Few					Few									Few
7	IE_EA_07B010600	BLACKWATER (KELLS)_060	BLACKWATER (KELLS)	RS07B010600	Stramaquerty Br (nr Drumagolan)	Cavan County Council	101.28	River Type 12	53.8748333	-7.0954112	Lowland Meandering	No	Q4			2	04/06/2015	2015																Few					Few										Few
7	IE_EA_07B010600	BLACKWATER (KELLS)_060	BLACKWATER (KELLS)	RS07B010600	Stramaquerty Br (nr Drumagolan)	Cavan County Council	101.28	River Type 12	53.8748333	-7.0954112	Lowland Straight	No	Q3-4	2	1		14/08/2018	2018							Few										Few				Few
7	IE_EA_07B010800	BLACKWATER (KELLS)_070	BLACKWATER (KELLS)	RS07B010800	Just u/s L Ramor (RHS)	Cavan County Council	83.66	River Type 11	53.8294355	-7.0824204			Q4	2			09/07/2009	2009										Few		Few										Numerous									Few
7	IE_EA_07B010800	BLACKWATER (KELLS)_070	BLACKWATER (KELLS)	RS07B010800	Just u/s L Ramor (RHS)	Cavan County Council	83.66	River Type 11	53.8294355	-7.0824204			Q4	2	1		29/08/2012	2012																			Few			Dominant									Few
7	IE_EA_07B010800	BLACKWATER (KELLS)_070	BLACKWATER (KELLS)	RS07B010800	Just u/s L Ramor (RHS)	Cavan County Council	83.66	River Type 11	53.8294355	-7.0824204	Lowland Meandering		Q4	2	1		16/06/2015	2015																					Few										Few
7	IE_EA_07B010800	BLACKWATER (KELLS)_070	BLACKWATER (KELLS)	RS07B010800	Just u/s L Ramor (RHS)	Cavan County Council	83.66	River Type 11	53.8294355	-7.0824204	Lowland Straight	No	Q3-4	2	1		14/08/2018	2018																					Few
7	IE_EA_07B011000	BLACKWATER (KELLS)_080	BLACKWATER (KELLS)	RS07B011000	Daly's Br	Cavan County Council	80.43	River Type 12	53.7686564	-7.0102673			Q3	2			09/07/2009	2009										Few				Few	Few							Numerous									Few
7	IE_EA_07B011000	BLACKWATER (KELLS)_080	BLACKWATER (KELLS)	RS07B011000	Daly's Br	Cavan County Council	80.43	River Type 12	53.7686564	-7.0102673			Q3	2	2		21/09/2012	2012														Few	Few							Common
7	IE_EA_07B011000	BLACKWATER (KELLS)_080	BLACKWATER (KELLS)	RS07B011000	Daly's Br	Cavan County Council	80.43	River Type 12	53.7686564	-7.0102673	Riffle Glide Pool	No	Q3	2			09/06/2015	2015																Few						Few
7	IE_EA_07B011000	BLACKWATER (KELLS)_080	BLACKWATER (KELLS)	RS07B011000	Daly's Br	Cavan County Council	80.43	River Type 12	53.7686564	-7.0102673	Lowland Straight	No	Q3-4	2	1		16/08/2018	2018															Few		Common				Common
7	IE_EA_07B011100	BLACKWATER (KELLS)_090	BLACKWATER (KELLS)	RS07B011100	Br nr Carnaross	Meath County Council	73.19	River Type 12	53.7467899	-6.9597765			Q3-4	2			22/07/2009	2009										Few		Few			Common							Dominant									Single
7	IE_EA_07B011100	BLACKWATER (KELLS)_090	BLACKWATER (KELLS)	RS07B011100	Br nr Carnaross	Meath County Council	73.19	River Type 12	53.7467899	-6.9597765			Q3-4	2			20/09/2012	2012										Few				Few								Excessive
7	IE_EA_07B011100	BLACKWATER (KELLS)_090	BLACKWATER (KELLS)	RS07B011100	Br nr Carnaross	Meath County Council	73.19	River Type 12	53.7467899	-6.9597765	Riffle Glide Pool	No	Q3-4	2	1		09/06/2015	2015																Few	Few					Common									Few
7	IE_EA_07B011100	BLACKWATER (KELLS)_090	BLACKWATER (KELLS)	RS07B011100	Br nr Carnaross	Meath County Council	73.19	River Type 12	53.7467899	-6.9597765	Lowland Straight	No	Q4	2	1		17/08/2018	2018																	Few				Numerous
7	IE_EA_07B011200	BLACKWATER (KELLS)_100	BLACKWATER (KELLS)	RS07B011200	Mabe's Br	Meath County Council	56.9	River Type 22	53.7401674	-6.8839947			Q3-4	2			22/07/2009	2009										Few					Few		Few					Excessive
7	IE_EA_07B011200	BLACKWATER (KELLS)_100	BLACKWATER (KELLS)	RS07B011200	Mabe's Br	Meath County Council	56.9	River Type 22	53.7401674	-6.8839947			Q3-4	3	2		20/09/2012	2012		Few								Few					Few							Excessive
7	IE_EA_07B011200	BLACKWATER (KELLS)_100	BLACKWATER (KELLS)	RS07B011200	Mabe's Br	Meath County Council	56.9	River Type 22	53.7401674	-6.8839947	Riffle Glide Pool	No	Q3-4	2	1		09/06/2015	2015							Few									Few					Numerous
7	IE_EA_07B011200	BLACKWATER (KELLS)_100	BLACKWATER (KELLS)	RS07B011200	Mabe's Br	Meath County Council	56.9	River Type 22	53.7401674	-6.8839947	Lowland Straight	No	Q3-4	2	1		17/08/2018	2018															Few		Common				Numerous
7	IE_EA_07B011500	BLACKWATER (KELLS)_110	BLACKWATER (KELLS)	RS07B011500	Donaghpatrick Br	Meath County Council	40.78	River Type 31	53.6941557	-6.7594876			Q4				22/07/2009	2009																						Numerous
7	IE_EA_07B011500	BLACKWATER (KELLS)_110	BLACKWATER (KELLS)	RS07B011500	Donaghpatrick Br	Meath County Council	40.78	River Type 31	53.6941557	-6.7594876			Q3-4	2			10/10/2012	2012										Few				Few								Numerous									Few
7	IE_EA_07B011500	BLACKWATER (KELLS)_110	BLACKWATER (KELLS)	RS07B011500	Donaghpatrick Br	Meath County Council	40.78	River Type 31	53.6941557	-6.7594876	Riffle Glide Pool	No	Q3	2	1		09/06/2015	2015															Few	Few	Few					Common
7	IE_EA_07B011500	BLACKWATER (KELLS)_110	BLACKWATER (KELLS)	RS07B011500	Donaghpatrick Br	Meath County Council	40.78	River Type 31	53.6941557	-6.7594876	Lowland Straight	No	Q3-4	2	1		07/08/2018	2018																	Few				Common
7	IE_EA_07B011800	BLACKWATER (KELLS)_120	BLACKWATER (KELLS)	RS07B011790	100m d/s New Bypass Br	Meath County Council	29.92	River Type 31	53.655997	-6.6850416			Q3-4	3			22/07/2009	2009										Few				Few			Few					Excessive
7	IE_EA_07B011800	BLACKWATER (KELLS)_120	BLACKWATER (KELLS)	RS07B011790	100m d/s New Bypass Br	Meath County Council	29.92	River Type 31	53.655997	-6.6850416			Q3-4	3			10/10/2012	2012		Few						Few		Few				Common	Few		Few					Numerous
7	IE_EA_07B011800	BLACKWATER (KELLS)_120	BLACKWATER (KELLS)	RS07B011800	Slane Rd Br Navan	Meath County Council	29.92	River Type 31	53.6548285	-6.6819242	Lowland Straight	No	Q3			5	09/08/2018	2018
7	IE_EA_07B020060	BLACKWATER (LONGWOOD)_010	BLACKWATER (LONGWOOD)	RS07B020060	Br S of Hortland	Kildare County Council	72.2	River Type 31	53.3697134	-6.7802466			Q4				10/08/2009	2009														Few			Few					Few
7	IE_EA_07B020060	BLACKWATER (LONGWOOD)_010	BLACKWATER (LONGWOOD)	RS07B020060	Br S of Hortland	Kildare County Council	72.2	River Type 31	53.3697134	-6.7802466			Q3			4	04/09/2012	2012														Few			Few					Few
7	IE_EA_07B020060	BLACKWATER (LONGWOOD)_010	BLACKWATER (LONGWOOD)	RS07B020060	Br S of Hortland	Kildare County Council	72.2	River Type 31	53.3697134	-6.7802466	Riffle Glide Pool		Q3	2		2	18/06/2015	2015																Few	Few				Few										Few
7	IE_EA_07B020060	BLACKWATER (LONGWOOD)_010	BLACKWATER (LONGWOOD)	RS07B020060	Br S of Hortland	Kildare County Council	72.2	River Type 31	53.3697134	-6.7802466	Lowland Straight	No	Q3	2	1		19/07/2018	2018																	Few				Numerous
7	IE_EA_07B020100	BLACKWATER (LONGWOOD)_020	BLACKWATER (LONGWOOD)	RS07B020100	Br at Johnstown	Kildare County Council	67.51	River Type 31	53.4041021	-6.8478603			Q3-4	3			10/08/2009	2009														Few	Few		Few					Few
7	IE_EA_07B020100	BLACKWATER (LONGWOOD)_020	BLACKWATER (LONGWOOD)	RS07B020100	Br at Johnstown	Kildare County Council	67.51	River Type 31	53.4041021	-6.8478603			Q3-4	2			04/09/2012	2012								Few	Few	Few				Common	Few		Few					Numerous
7	IE_EA_07B020100	BLACKWATER (LONGWOOD)_020	BLACKWATER (LONGWOOD)	RS07B020100	Br at Johnstown	Kildare County Council	67.51	River Type 31	53.4041021	-6.8478603	Riffle Glide Pool		Q3-4	2			18/06/2015	2015																Few	Few				Few
7	IE_EA_07B020100	BLACKWATER (LONGWOOD)_020	BLACKWATER (LONGWOOD)	RS07B020100	Br at Johnstown	Kildare County Council	67.51	River Type 31	53.4041021	-6.8478603	Lowland Straight	No	Q3-4	4	1		19/07/2018	2018										Single				Few			Few				Few										Few
7	IE_EA_07B020200	BLACKWATER (LONGWOOD)_030	BLACKWATER (LONGWOOD)	RS07B020200	Blackwater Br	Meath County Council	65.95	River Type 31	53.4257825	-6.8909082			Q3				31/07/2009	2009		Few				Few			Single					Common			Common				Few
7	IE_EA_07B020300	BLACKWATER (LONGWOOD)_040	BLACKWATER (LONGWOOD)	RS07B020300	Br ESE of Longwood	Kildare County Council	64.59	River Type 31	53.4524247	-6.9146083			Q3-4	2			04/09/2012	2012		Few						Few		Few				Few								Common
7	IE_EA_07B020300	BLACKWATER (LONGWOOD)_040	BLACKWATER (LONGWOOD)	RS07B020300	Br ESE of Longwood	Kildare County Council	64.59	River Type 31	53.4524247	-6.9146083	Riffle Glide Pool		Q3-4	2			18/06/2015	2015		Few														Few	Few				Numerous
7	IE_EA_07B020300	BLACKWATER (LONGWOOD)_040	BLACKWATER (LONGWOOD)	RS07B020300	Br ESE of Longwood	Kildare County Council	64.59	River Type 31	53.4524247	-6.9146083	Lowland Straight	No	Q3-4	2	1		19/07/2018	2018														Few							Numerous										Single
7	IE_EA_07B020600	BLACKWATER (LONGWOOD)_050	BLACKWATER (LONGWOOD)	RS07B020600	Br u/s Boyne R confl	Meath County Council	61.44	River Type 31	53.4959436	-6.9256692			Q4	2			31/07/2009	2009		Few						Few						Few								Numerous
7	IE_EA_07B020600	BLACKWATER (LONGWOOD)_050	BLACKWATER (LONGWOOD)	RS07B020600	Br u/s Boyne R confl	Meath County Council	61.44	River Type 31	53.4959436	-6.9256692			Q3-4	2	2		04/09/2012	2012		Few												Few								Dominant
7	IE_EA_07B020600	BLACKWATER (LONGWOOD)_050	BLACKWATER (LONGWOOD)	RS07B020600	Br u/s Boyne R confl	Meath County Council	61.44	River Type 31	53.4959436	-6.9256692	Riffle Glide Pool	No	Q3-4	2	1		15/06/2015	2015																	Few				Common
7	IE_EA_07B020600	BLACKWATER (LONGWOOD)_050	BLACKWATER (LONGWOOD)	RS07B020600	Br u/s Boyne R confl	Meath County Council	61.44	River Type 31	53.4959436	-6.9256692	Lowland Straight	No	Q3-4	2	1		25/09/2018	2018																	Few				Numerous
7	IE_EA_07B030200	BOYCETOWN_010	BOYCETOWN	RS07B030100	BOYCETOWN - Derrypatrick Br	Meath County Council	70.78	River Type 31	53.5050815	-6.6629145			Q3		2		06/06/2012	2012									Few					Few			Numerous				Numerous
7	IE_EA_07B030200	BOYCETOWN_010	BOYCETOWN	RS07B030200	Br N of Martinstown	Meath County Council	70.78	River Type 31	53.5240853	-6.6846706			Q3-4	3			30/07/2009	2009														Few			Few					Dominant
7	IE_EA_07B030200	BOYCETOWN_010	BOYCETOWN	RS07B030200	Br N of Martinstown	Meath County Council	70.78	River Type 31	53.5240853	-6.6846706			Q3	2	2		06/06/2012	2012		Few						Few		Few				Few			Few				Dominant
7	IE_EA_07B030200	BOYCETOWN_010	BOYCETOWN	RS07B030200	Br N of Martinstown	Meath County Council	70.78	River Type 31	53.5240853	-6.6846706	Riffle Glide Pool	Unknown	Q3	2	1		05/11/2014	2014		Few						Few		Few				Few							Dominant
7	IE_EA_07B030200	BOYCETOWN_010	BOYCETOWN	RS07B030200	Br N of Martinstown	Meath County Council	70.78	River Type 31	53.5240853	-6.6846706	Riffle Glide Pool		Q3	2	1		19/08/2015	2015									Few					Few			Few				Numerous
7	IE_EA_07B030200	BOYCETOWN_010	BOYCETOWN	RS07B030200	Br N of Martinstown	Meath County Council	70.78	River Type 31	53.5240853	-6.6846706	Lowland Straight	No	Q3-4	2	1		07/08/2018	2018														Few			Few				Few
7	IE_EA_07B030300	BOYCETOWN_020	BOYCETOWN	RS07B030300	Scurlockstown Br	Meath County Council	50.61	River Type 31	53.5483024	-6.7442772			Q3-4	2			30/07/2009	2009																	Few					Dominant
7	IE_EA_07B030300	BOYCETOWN_020	BOYCETOWN	RS07B030300	Scurlockstown Br	Meath County Council	50.61	River Type 31	53.5483024	-6.7442772			Q3-4	2	1		06/06/2012	2012		Few												Few			Few				Common
7	IE_EA_07B030300	BOYCETOWN_020	BOYCETOWN	RS07B030300	Scurlockstown Br	Meath County Council	50.61	River Type 31	53.5483024	-6.7442772	Riffle Glide Pool	No	Q3-4	2			05/11/2014	2014									Few					Few			Few				Few
7	IE_EA_07B030300	BOYCETOWN_020	BOYCETOWN	RS07B030300	Scurlockstown Br	Meath County Council	50.61	River Type 31	53.5483024	-6.7442772	Riffle Glide Pool		Q3	4	1		19/08/2015	2015																	Few				Numerous
7	IE_EA_07B030300	BOYCETOWN_020	BOYCETOWN	RS07B030300	Scurlockstown Br	Meath County Council	50.61	River Type 31	53.5483024	-6.7442772	Riffle Glide Pool	No	Q3-4	2	1		07/08/2018	2018														Few	Few		Few				Common
7	IE_EA_07B040200	BOYNE_010	BOYNE	RS07B040200	Boyne Br	Kildare County Council	65.77	River Type 31	53.3573883	-7.0453967			Q4	3			17/06/2009	2009		Few					Few							Few			Few					Numerous
7	IE_EA_07B040200	BOYNE_010	BOYNE	RS07B040200	Boyne Br	Kildare County Council	65.77	River Type 31	53.3573883	-7.0453967			Q3-4			5	14/08/2012	2012														Few			Few				Numerous
7	IE_EA_07B040200	BOYNE_010	BOYNE	RS07B040200	Boyne Br	Kildare County Council	65.77	River Type 31	53.3573883	-7.0453967	Riffle Glide Pool	Yes	Q3-4			2	05/11/2014	2014		Few						Few	Few					Few							Few
7	IE_EA_07B040200	BOYNE_010	BOYNE	RS07B040200	Boyne Br	Kildare County Council	65.77	River Type 31	53.3573883	-7.0453967	Lowland Meandering	Yes	Q3-4			2	31/08/2015	2015							Few							Few			Common				Few
7	IE_EA_07B040200	BOYNE_010	BOYNE	RS07B040200	Boyne Br	Kildare County Council	65.77	River Type 31	53.3573883	-7.0453967	Lowland Straight	Unknown	Q3-4	2			25/07/2018	2018							Few										Common		Few		Common
7	IE_EA_07B040300	BOYNE_020	BOYNE	RS07B040300	Kinnafad Br	Offaly County Council	65.59	River Type 31	53.3616041	-7.0771368			Q3-4				17/06/2009	2009		Few					Few			Few				Few			Common					Numerous
7	IE_EA_07B040300	BOYNE_020	BOYNE	RS07B040300	Kinnafad Br	Offaly County Council	65.59	River Type 31	53.3616041	-7.0771368			Q3-4			5	14/08/2012	2012														Few			Few					Few
7	IE_EA_07B040300	BOYNE_020	BOYNE	RS07B040300	Kinnafad Br	Offaly County Council	65.59	River Type 31	53.3616041	-7.0771368	Lowland Meandering	Yes	Q3-4			2	31/08/2015	2015									Few					Few			Few				Few
7	IE_EA_07B040300	BOYNE_020	BOYNE	RS07B040300	Kinnafad Br	Offaly County Council	65.59	River Type 31	53.3616041	-7.0771368	Lowland Straight	No	Q3-4	2			25/07/2018	2018							Few										Common				Few
7	IE_EA_07B040400	BOYNE_030	BOYNE	RS07B040400	Ballyboggan Br	Meath County Council	65.09	River Type 31	53.40834	-7.0391347			Q4	2			15/06/2009	2009										Few							Few				Few
7	IE_EA_07B040400	BOYNE_030	BOYNE	RS07B040400	Ballyboggan Br	Meath County Council	65.09	River Type 31	53.40834	-7.0391347			Q4			5	22/08/2012	2012																	Few					Numerous
7	IE_EA_07B040400	BOYNE_030	BOYNE	RS07B040400	Ballyboggan Br	Meath County Council	65.09	River Type 31	53.40834	-7.0391347	Lowland Straight	No	Q3-4			5	25/07/2018	2018																	Few
7	IE_EA_07B040600	BOYNE_040	BOYNE	RS07B040600	Ashfield Br	Meath County Council	63.76	River Type 31	53.4494465	-6.9693569			Q3-4	2			15/06/2009	2009														Few			Few				Few										Few
7	IE_EA_07B040600	BOYNE_040	BOYNE	RS07B040600	Ashfield Br	Meath County Council	63.76	River Type 31	53.4494465	-6.9693569			Q3-4			5	22/08/2012	2012								Few						Few					Few
7	IE_EA_07B040600	BOYNE_040	BOYNE	RS07B040600	Ashfield Br	Meath County Council	63.76	River Type 31	53.4494465	-6.9693569	Lowland Meandering		Q3-4			2	18/06/2015	2015		Few														Few	Few		Few		Few
7	IE_EA_07B040600	BOYNE_040	BOYNE	RS07B040600	Ashfield Br	Meath County Council	63.76	River Type 31	53.4494465	-6.9693569	Lowland Straight	No	Q3-4			5	25/07/2018	2018							Few							Few			Few
7	IE_EA_07B040800	BOYNE_050	BOYNE	RS07B040800	Inchamore Br	Meath County Council	61.18	River Type 31	53.4944217	-6.9286703			Q4-5	3			15/06/2009	2009										Few							Few					Common									Single
7	IE_EA_07B040800	BOYNE_050	BOYNE	RS07B040800	Inchamore Br	Meath County Council	61.18	River Type 31	53.4944217	-6.9286703			Q4	2	1		22/08/2012	2012		Few						Few		Few				Few					Few			Common
7	IE_EA_07B040800	BOYNE_050	BOYNE	RS07B040800	Inchamore Br	Meath County Council	61.18	River Type 31	53.4944217	-6.9286703	Lowland Meandering		Q4-5				17/06/2015	2015					Few												Few				Few
7	IE_EA_07B040800	BOYNE_050	BOYNE	RS07B040800	Inchamore Br	Meath County Council	61.18	River Type 31	53.4944217	-6.9286703	Lowland Straight	No	Q4	2	2		01/08/2018	2018																					Common
7	IE_EA_07B040900	BOYNE_060	BOYNE	RS07B040900	Scarriff Br	Meath County Council	59.17	River Type 31	53.5189531	-6.8933906			Q3-4	1		4	22/08/2012	2012										Few				Few			Few					Numerous
7	IE_EA_07B040900	BOYNE_060	BOYNE	RS07B040900	Scarriff Br	Meath County Council	59.17	River Type 31	53.5189531	-6.8933906	Riffle Glide Pool		Q3-4	2	2		20/08/2015	2015										Few				Few			Few				Common
7	IE_EA_07B040900	BOYNE_060	BOYNE	RS07B040900	Scarriff Br	Meath County Council	59.17	River Type 31	53.5189531	-6.8933906	Lowland Straight	No	Q4	2	2		01/08/2018	2018														Few			Few				Common
7	IE_EA_07B041000	BOYNE_070	BOYNE	RS07B041000	Derrinydaly Br	Meath County Council	55.75	River Type 31	53.5297907	-6.843529			Q4	3			15/06/2009	2009														Few			Few				Numerous
7	IE_EA_07B041000	BOYNE_070	BOYNE	RS07B041000	Derrinydaly Br	Meath County Council	55.75	River Type 31	53.5297907	-6.843529			Q4	1		6	22/08/2012	2012								Few						Few								Dominant
7	IE_EA_07B041000	BOYNE_070	BOYNE	RS07B041000	Derrinydaly Br	Meath County Council	55.75	River Type 31	53.5297907	-6.843529	Lowland Meandering	No	Q4			3	17/06/2015	2015					Few											Few	Few				Few
7	IE_EA_07B041000	BOYNE_070	BOYNE	RS07B041000	Derrinydaly Br	Meath County Council	55.75	River Type 31	53.5297907	-6.843529	Lowland Straight	No	Q3-4			5	01/08/2018	2018							Few														Few
7	IE_EA_07B041200	BOYNE_080	BOYNE	RS07B041200	West Br Trim	Meath County Council	50.41	River Type 32	53.5566098	-6.7935598			Q3-4	3			26/05/2009	2009		Few								Few				Few								Few
7	IE_EA_07B041200	BOYNE_080	BOYNE	RS07B041200	West Br Trim	Meath County Council	50.41	River Type 32	53.5566098	-6.7935598			Q3-4	2			23/08/2012	2012		Common						Few						Few			Few					Common
7	IE_EA_07B041200	BOYNE_080	BOYNE	RS07B041200	West Br Trim	Meath County Council	50.41	River Type 32	53.5566098	-6.7935598	Riffle Glide Pool		Q3-4	2			20/08/2015	2015										Few					Few		Few				Common
7	IE_EA_07B041200	BOYNE_080	BOYNE	RS07B041200	West Br Trim	Meath County Council	50.41	River Type 32	53.5566098	-6.7935598	Lowland Straight	No	Q3-4	2	1		08/08/2018	2018														Few			Few				Common
7	IE_EA_07B041400	BOYNE_090	BOYNE	RS07B041400	u/s Knightsbrook R confl (RHS)	Meath County Council	48.31	River Type 31	53.5531465	-6.7537731			Q3-4	3			26/05/2009	2009		Few												Few	Few							Few
7	IE_EA_07B041400	BOYNE_090	BOYNE	RS07B041400	u/s Knightsbrook R confl (RHS)	Meath County Council	48.31	River Type 31	53.5531465	-6.7537731			Q3-4	2			23/08/2012	2012		Few												Few								Excessive
7	IE_EA_07B041400	BOYNE_090	BOYNE	RS07B041400	u/s Knightsbrook R confl (RHS)	Meath County Council	48.31	River Type 31	53.5531465	-6.7537731	Riffle Glide Pool		Q3-4	2	5		19/08/2015	2015		Few													Few		Common				Common
7	IE_EA_07B041400	BOYNE_090	BOYNE	RS07B041400	u/s Knightsbrook R confl (RHS)	Meath County Council	48.31	River Type 31	53.5531465	-6.7537731	Lowland Straight	No	Q3-4	2	1		08/08/2018	2018														Few							Common
7	IE_EA_07B041500	BOYNE_100	BOYNE	RS07B041500	Bective Bridge	Meath County Council	43.65	River Type 31	53.5808688	-6.7004974			Q3-4	3			26/05/2009	2009										Few				Common	Few		Few					Dominant									Single
7	IE_EA_07B041500	BOYNE_100	BOYNE	RS07B041500	Bective Bridge	Meath County Council	43.65	River Type 31	53.5808688	-6.7004974			Q3-4	1		3	23/08/2012	2012		Single						Few						Numerous								Dominant
7	IE_EA_07B041500	BOYNE_100	BOYNE	RS07B041500	Bective Bridge	Meath County Council	43.65	River Type 31	53.5808688	-6.7004974	Lowland Meandering		Q3-4	2	1		18/08/2015	2015					Few					Few				Few			Few				Common
7	IE_EA_07B041500	BOYNE_100	BOYNE	RS07B041500	Bective Bridge	Meath County Council	43.65	River Type 31	53.5808688	-6.7004974	Lowland Straight	No	Q3-4	2	1		08/08/2018	2018					Few									Few			Few				Numerous
7	IE_EA_07B041700	BOYNE_120	BOYNE	RS07B041700	Kilcarn Old Bridge	Meath County Council	33.51	River Type 32	53.6322382	-6.6616504			Q3-4	3			26/05/2009	2009		Few															Few					Common
7	IE_EA_07B041700	BOYNE_120	BOYNE	RS07B041700	Kilcarn Old Bridge	Meath County Council	33.51	River Type 32	53.6322382	-6.6616504			Q3-4	1		5	23/08/2012	2012								Few						Few	Few		Few					Common
7	IE_EA_07B041700	BOYNE_120	BOYNE	RS07B041700	Kilcarn Old Bridge	Meath County Council	33.51	River Type 32	53.6322382	-6.6616504	Lowland Meandering		Q3-4	2	1		18/08/2015	2015																	Few				Common
7	IE_EA_07B041700	BOYNE_120	BOYNE	RS07B041700	Kilcarn Old Bridge	Meath County Council	33.51	River Type 32	53.6322382	-6.6616504	Lowland Straight	No	Q4	2	1		09/08/2018	2018		Few												Few							Common
7	IE_EA_07B042010	BOYNE_150	BOYNE	RS07B042010	d/s Broadboyne Br (RHS)	Meath County Council	21.17	River Type 32	53.6844524	-6.6006083			Q3-4	3			26/05/2009	2009		Single					Single							Few			Few					Dominant
7	IE_EA_07B042010	BOYNE_150	BOYNE	RS07B042010	d/s Broadboyne Br (RHS)	Meath County Council	21.17	River Type 32	53.6844524	-6.6006083			Q4	2			23/08/2012	2012		Single						Single						Few			Few		Few			Numerous
7	IE_EA_07B042010	BOYNE_150	BOYNE	RS07B042010	d/s Broadboyne Br (RHS)	Meath County Council	21.17	River Type 32	53.6844524	-6.6006083	Lowland Meandering		Q3-4		1	2	18/08/2015	2015																	Few				Dominant
7	IE_EA_07B042010	BOYNE_150	BOYNE	RS07B042010	d/s Broadboyne Br (RHS)	Meath County Council	21.17	River Type 32	53.6844524	-6.6006083	Lowland Meandering	No	Q3-4			5	09/08/2018	2018																	Few				Few
7	IE_EA_07B042100	BOYNE_160	BOYNE	RS07B042100	Slane Br	Meath County Council	13.51	River Type 32	53.7037618	-6.5410356			Q3-4				30/07/2007	2007														Few								Excessive
7	IE_EA_07B042100	BOYNE_160	BOYNE	RS07B042100	Slane Br	Meath County Council	13.51	River Type 32	53.7037618	-6.5410356			Q3-4	2			07/10/2008	2008		Single				Single	Single			Few				Few								Dominant
7	IE_EA_07B042100	BOYNE_160	BOYNE	RS07B042100	Slane Br	Meath County Council	13.51	River Type 32	53.7037618	-6.5410356			Q4	3			25/05/2009	2009		Single					Few			Few				Common	Few		Few					Dominant
7	IE_EA_07B042100	BOYNE_160	BOYNE	RS07B042100	Slane Br	Meath County Council	13.51	River Type 32	53.7037618	-6.5410356			Q4	2	1		10/10/2012	2012		Few								Few				Few	Few		Few					Numerous
7	IE_EA_07B042100	BOYNE_160	BOYNE	RS07B042100	Slane Br	Meath County Council	13.51	River Type 32	53.7037618	-6.5410356	Lowland Meandering		Q3-4		1	2	18/08/2015	2015		Few								Few							Few				Dominant
7	IE_EA_07B042100	BOYNE_160	BOYNE	RS07B042100	Slane Br	Meath County Council	13.51	River Type 32	53.7037618	-6.5410356	Lowland Straight	No	Q4	2	1		22/08/2018	2018							Few							Few			Few				Few
7	IE_EA_07B042150	BOYNE_170	BOYNE	RS07B042150	Ford S of Broc Ho	Meath County Council	7.95	River Type 32	53.6866451	-6.4852097			Q4				25/05/2009	2009														Few			Few					Dominant
7	IE_EA_07B042150	BOYNE_170	BOYNE	RS07B042150	Ford S of Broc Ho	Meath County Council	7.95	River Type 32	53.6866451	-6.4852097			Q4				10/10/2012	2012														Few			Few					Dominant
7	IE_EA_07B042200	Boyne_180	BOYNE	RS07B042200	Oldbridge (Obelisk Br)	Meath County Council	1.6	River Type 33	53.7246129	-6.4151995			Q3-4				25/05/2009	2009		Single												Few			Few					Excessive
7	IE_EA_07B042200	Boyne_180	BOYNE	RS07B042200	Oldbridge (Obelisk Br)	Meath County Council	1.6	River Type 33	53.7246129	-6.4151995			Q3-4			5	23/08/2012	2012		Single												Few			Few		Few			Numerous
7	IE_EA_07B042200	Boyne_180	BOYNE	RS07B042200	Oldbridge (Obelisk Br)	Meath County Council	1.6	River Type 33	53.7246129	-6.4151995	Lowland Meandering	No	Q4	2	1		24/06/2015	2015														Few			Few				Common
7	IE_EA_07B042200	Boyne_180	BOYNE	RS07B042200	Oldbridge (Obelisk Br)	Meath County Council	1.6	River Type 33	53.7246129	-6.4151995	Lowland Straight	No	Q4	4	2		22/08/2018	2018														Few			Common				Numerous
7	IE_EA_07C010100	CLADY (MEATH)_010	CLADY (MEATH)	RS07C010100	Dunderry Bridge	Meath County Council	60.08	River Type 31	53.6073732	-6.7737515			Q2-3	2			23/07/2009	2009						Single		Single									Few					Numerous
7	IE_EA_07C010260	CLADY (MEATH)_020	CLADY (MEATH)	RS07C010200	CLADY (MEATH) - Br nr Ballybrigh Ho	Meath County Council	50.5	River Type 31	53.585755	-6.7321198			Q3	2			23/07/2009	2009												Few		Few	Few							Dominant
7	IE_EA_07C010260	CLADY (MEATH)_020	CLADY (MEATH)	RS07C010200	CLADY (MEATH) - Br nr Ballybrigh Ho	Meath County Council	50.5	River Type 31	53.585755	-6.7321198			Q3	2			12/06/2012	2012														Common	Few							Excessive
7	IE_EA_07C010260	CLADY (MEATH)_020	CLADY (MEATH)	RS07C010200	CLADY (MEATH) - Br nr Ballybrigh Ho	Meath County Council	50.5	River Type 31	53.585755	-6.7321198	Riffle Glide Pool		Q3	2	1		18/08/2015	2015																					Numerous
7	IE_EA_07C010260	CLADY (MEATH)_020	CLADY (MEATH)	RS07C010200	CLADY (MEATH) - Br nr Ballybrigh Ho	Meath County Council	50.5	River Type 31	53.585755	-6.7321198	Lowland Straight	No	Q3	2	1		08/08/2018	2018							Few														Excessive
7	IE_EA_07C020930	CROSS WATER_010	CROSS WATER	RS07C020930	Br u/s Blackwater (Kells) rv confluence	Meath County Council	87.46	River Type 32	53.774922	-7.0354059			Q3-4	2	2		29/08/2012	2012														Common								Excessive
7	IE_EA_07C020930	CROSS WATER_010	CROSS WATER	RS07C020930	Br u/s Blackwater (Kells) rv confluence	Meath County Council	87.46	River Type 32	53.774922	-7.0354059	Riffle Glide Pool	No	Q3-4	2	1		04/06/2015	2015																Few	Few				Dominant
7	IE_EA_07C020930	CROSS WATER_010	CROSS WATER	RS07C020930	Br u/s Blackwater (Kells) rv confluence	Meath County Council	87.46	River Type 32	53.774922	-7.0354059	Lowland Straight	No	Q3-4	2	1		15/08/2018	2018																	Few				Common
7	IE_EA_07C040050	CASTLEJORDAN_010	CASTLEJORDAN	RS07C040040	CASTLEJORDAN - Br SE of Rochfortbridge	Westmeath County Council	80.65	River Type 32	53.4106964	-7.2949513			Q3	1			14/09/2012	2012								Few	Few	Few				Few			Few					Dominant
7	IE_EA_07C040050	CASTLEJORDAN_010	CASTLEJORDAN	RS07C040040	CASTLEJORDAN - Br SE of Rochfortbridge	Westmeath County Council	80.65	River Type 32	53.4106964	-7.2949513	Riffle Glide Pool		Q3	2			25/08/2015	2015		Few					Few							Few			Dominant				Few
7	IE_EA_07C040050	CASTLEJORDAN_010	CASTLEJORDAN	RS07C040040	CASTLEJORDAN - Br SE of Rochfortbridge	Westmeath County Council	80.65	River Type 32	53.4106964	-7.2949513			Q3			3	26/06/2018	2018														Few			Few
7	IE_EA_07C040050	CASTLEJORDAN_010	CASTLEJORDAN	RS07C040050	SE of Rahinine d/s Rochfortbridge Stream	Westmeath County Council	80.65	River Type 32	53.4122038	-7.2876875			Q3	2			11/08/2009	2009		Few						Common						Few	Few							Numerous
7	IE_EA_07C040100	CASTLEJORDAN_020	CASTLEJORDAN	RS07C040100	Baltinoran Br	Westmeath County Council	72.42	River Type 31	53.4143622	-7.1670328			Q3-4	3			10/08/2009	2009														Few																	Few
7	IE_EA_07C040100	CASTLEJORDAN_020	CASTLEJORDAN	RS07C040100	Baltinoran Br	Westmeath County Council	72.42	River Type 31	53.4143622	-7.1670328			Q3-4			4	13/09/2012	2012														Few
7	IE_EA_07C040100	CASTLEJORDAN_020	CASTLEJORDAN	RS07C040100	Baltinoran Br	Westmeath County Council	72.42	River Type 31	53.4143622	-7.1670328	Lowland Meandering	Yes	Q3-4		1	2	31/08/2015	2015							Few							Few			Few				Few
7	IE_EA_07C040100	CASTLEJORDAN_020	CASTLEJORDAN	RS07C040100	Baltinoran Br	Westmeath County Council	72.42	River Type 31	53.4143622	-7.1670328	Lowland Straight	No	Q4	2	1		02/08/2018	2018							Few							Few			Few				Few
7	IE_EA_07C040190	CASTLEJORDAN_030	CASTLEJORDAN	RS07C040190	Castlejordan Br	Meath County Council	69.45	River Type 31	53.3961003	-7.1117652			Q4	3			11/08/2009	2009										Few				Few			Few				Numerous										Single
7	IE_EA_07C040190	CASTLEJORDAN_030	CASTLEJORDAN	RS07C040190	Castlejordan Br	Meath County Council	69.45	River Type 31	53.3961003	-7.1117652			Q4	2			13/09/2012	2012										Few				Few	Few							Numerous
7	IE_EA_07C040190	CASTLEJORDAN_030	CASTLEJORDAN	RS07C040190	Castlejordan Br	Meath County Council	69.45	River Type 31	53.3961003	-7.1117652	Riffle Glide Pool	No	Q4	2	1		23/06/2015	2015										Few				Few			Few				Few
7	IE_EA_07C040190	CASTLEJORDAN_030	CASTLEJORDAN	RS07C040190	Castlejordan Br	Meath County Council	69.45	River Type 31	53.3961003	-7.1117652	Riffle Glide Pool	No	Q4	2	1		28/06/2018	2018		Few								Few											Few
7	IE_EA_07C050700	CHAPEL LAKE STREAM_010	CHAPEL LAKE STREAM	RS07C050700	Br u/s Blackwater R confl	Cavan County Council	107.98	River Type 12	53.9010122	-7.0629584			Q4-5	3			27/06/2012	2012		Few		Single						Few												Few
7	IE_EA_07C050700	CHAPEL LAKE STREAM_010	CHAPEL LAKE STREAM	RS07C050700	Br u/s Blackwater R confl	Cavan County Council	107.98	River Type 12	53.9010122	-7.0629584	Riffle Glide Pool	Yes	Q4-5	2	1		01/09/2015	2015														Few			Few				Few										Few
7	IE_EA_07C050700	CHAPEL LAKE STREAM_010	CHAPEL LAKE STREAM	RS07C050700	Br u/s Blackwater R confl	Cavan County Council	107.98	River Type 12	53.9010122	-7.0629584	Lowland Straight	No	Q4	2	1		14/08/2018	2018														Few							Few										Single
7	IE_EA_07C070055	CROSSKEYS STREAM_010	CROSSKEYS STREAM	RS07C070055	Curlingford Br	Meath County Council	88.55	River Type 32	53.649829	-7.0732464			Q3-4	2			17/06/2009	2009														Few	Few		Few					Excessive
7	IE_EA_07C070055	CROSSKEYS STREAM_010	CROSSKEYS STREAM	RS07C070055	Curlingford Br	Meath County Council	88.55	River Type 32	53.649829	-7.0732464			Q3-4	1			06/09/2012	2012						Single								Few			Few					Dominant
7	IE_EA_07C070055	CROSSKEYS STREAM_010	CROSSKEYS STREAM	RS07C070055	Curlingford Br	Meath County Council	88.55	River Type 32	53.649829	-7.0732464	Riffle Glide Pool	No	Q4	2	1		10/06/2015	2015																Few					Dominant
7	IE_EA_07C070055	CROSSKEYS STREAM_010	CROSSKEYS STREAM	RS07C070055	Curlingford Br	Meath County Council	88.55	River Type 32	53.649829	-7.0732464	Lowland Straight	No	Q3-4	4	2		31/07/2018	2018									Single					Single			Few				Dominant
7	IE_EA_07D010070	DEEL (RAHARNEY)_010	DEEL (RAHARNEY)	RS07D010070	Br W of Mabestown	Westmeath County Council	82.4	River Type 31	53.6362397	-7.1552558			Q4	2			27/07/2009	2009		Few								Few				Few			Few					Numerous
7	IE_EA_07D010070	DEEL (RAHARNEY)_010	DEEL (RAHARNEY)	RS07D010070	Br W of Mabestown	Westmeath County Council	82.4	River Type 31	53.6362397	-7.1552558			Q4	2	2		05/09/2012	2012		Few								Few				Few			Few					Numerous
7	IE_EA_07D010070	DEEL (RAHARNEY)_010	DEEL (RAHARNEY)	RS07D010070	Br W of Mabestown	Westmeath County Council	82.4	River Type 31	53.6362397	-7.1552558	Riffle Glide Pool		Q4	2	3		24/08/2015	2015		Few								Few					Few		Few				Common
7	IE_EA_07D010070	DEEL (RAHARNEY)_010	DEEL (RAHARNEY)	RS07D010070	Br W of Mabestown	Westmeath County Council	82.4	River Type 31	53.6362397	-7.1552558	Riffle Glide Pool	No	Q4	2	1		24/07/2018	2018					Single					Few					Few						Few
7	IE_EA_07D010200	DEEL (RAHARNEY)_030	DEEL (RAHARNEY)	RS07D010200	Cummer Br	Westmeath County Council	75.96	River Type 31	53.5652296	-7.1176109			Q3-4	2			27/07/2009	2009						Single		Few						Few	Few		Few					Numerous
7	IE_EA_07D010200	DEEL (RAHARNEY)_030	DEEL (RAHARNEY)	RS07D010200	Cummer Br	Westmeath County Council	75.96	River Type 31	53.5652296	-7.1176109			Q3-4	2			06/09/2012	2012								Few		Few				Few								Dominant
7	IE_EA_07D010200	DEEL (RAHARNEY)_030	DEEL (RAHARNEY)	RS07D010200	Cummer Br	Westmeath County Council	75.96	River Type 31	53.5652296	-7.1176109	Riffle Glide Pool		Q4	2	2		24/08/2015	2015					Few					Few							Few				Few
7	IE_EA_07D010200	DEEL (RAHARNEY)_030	DEEL (RAHARNEY)	RS07D010200	Cummer Br	Westmeath County Council	75.96	River Type 31	53.5652296	-7.1176109	Lowland Straight	No	Q3-4	2	1		24/07/2018	2018										Few											Few
7	IE_EA_07D010300	DEEL (RAHARNEY)_040	DEEL (RAHARNEY)	RS07D010300	Raharney Br	Westmeath County Council	70.85	River Type 31	53.5237202	-7.0939282			Q3-4	2			28/07/2009	2009										Few							Few					Numerous
7	IE_EA_07D010300	DEEL (RAHARNEY)_040	DEEL (RAHARNEY)	RS07D010300	Raharney Br	Westmeath County Council	70.85	River Type 31	53.5237202	-7.0939282			Q3-4	2			05/09/2012	2012										Few							Few					Few
7	IE_EA_07D010300	DEEL (RAHARNEY)_040	DEEL (RAHARNEY)	RS07D010300	Raharney Br	Westmeath County Council	70.85	River Type 31	53.5237202	-7.0939282	Riffle Glide Pool	No	Q4	2	1		23/06/2015	2015										Few							Few				Few
7	IE_EA_07D010300	DEEL (RAHARNEY)_040	DEEL (RAHARNEY)	RS07D010300	Raharney Br	Westmeath County Council	70.85	River Type 31	53.5237202	-7.0939282	Lowland Straight	No	Q4	2	1		24/07/2018	2018																					Dominant
7	IE_EA_07D010400	DEEL (RAHARNEY)_050	DEEL (RAHARNEY)	RS07D010400	Inan Br	Westmeath County Council	66.62	River Type 31	53.499838	-7.0437029			Q3-4	1			28/07/2009	2009																	Few					Numerous
7	IE_EA_07D010400	DEEL (RAHARNEY)_050	DEEL (RAHARNEY)	RS07D010400	Inan Br	Westmeath County Council	66.62	River Type 31	53.499838	-7.0437029			Q3-4	2			05/09/2012	2012										Few				Few			Few					Dominant
7	IE_EA_07D010400	DEEL (RAHARNEY)_050	DEEL (RAHARNEY)	RS07D010400	Inan Br	Westmeath County Council	66.62	River Type 31	53.499838	-7.0437029	Lowland Meandering		Q3-4			2	24/08/2015	2015							Few										Few				Common
7	IE_EA_07D010400	DEEL (RAHARNEY)_050	DEEL (RAHARNEY)	RS07D010400	Inan Br	Westmeath County Council	66.62	River Type 31	53.499838	-7.0437029	Lowland Straight	No	Q3-4			4	02/08/2018	2018							Single										Few				Few
7	IE_EA_07D010600	DEEL (RAHARNEY)_060	DEEL (RAHARNEY)	RS07D010600	Br u/s Boyne R confl	Meath County Council	63.38	River Type 31	53.4893024	-6.9598744			Q3-4				28/07/2009	2009																	Few					Dominant
7	IE_EA_07D010600	DEEL (RAHARNEY)_060	DEEL (RAHARNEY)	RS07D010600	Br u/s Boyne R confl	Meath County Council	63.38	River Type 31	53.4893024	-6.9598744			Q3-4	2			04/09/2012	2012														Few	Few		Few					Numerous
7	IE_EA_07D010600	DEEL (RAHARNEY)_060	DEEL (RAHARNEY)	RS07D010600	Br u/s Boyne R confl	Meath County Council	63.38	River Type 31	53.4893024	-6.9598744	Riffle Glide Pool		Q3-4	2	1		20/08/2015	2015																	Few				Few
7	IE_EA_07D010600	DEEL (RAHARNEY)_060	DEEL (RAHARNEY)	RS07D010600	Br u/s Boyne R confl	Meath County Council	63.38	River Type 31	53.4893024	-6.9598744	Lowland Straight	No	Q4	2	1		02/08/2018	2018														Few			Few				Common
7	IE_EA_07D020140	DEVLIN'S_010	DEVLIN'S	RS07D020140	Br S of Grange X-Rds	Meath County Council	75.65	River Type 13	53.7473056	-6.5515528			Q3	2			04/08/2009	2009		Few				Few											Few					Dominant
7	IE_EA_07D020140	DEVLIN'S_010	DEVLIN'S	RS07D020140	Br S of Grange X-Rds	Meath County Council	75.65	River Type 13	53.7473056	-6.5515528			Q3-4	2			13/06/2012	2012		Few						Few		Few				Few	Few		Few					Excessive
7	IE_EA_07D020140	DEVLIN'S_010	DEVLIN'S	RS07D020140	Br S of Grange X-Rds	Meath County Council	75.65	River Type 13	53.7473056	-6.5515528	Riffle Glide Pool	Yes	Q3-4	2	2		06/11/2014	2014		Few								Few				Few							Few
7	IE_EA_07D020140	DEVLIN'S_010	DEVLIN'S	RS07D020140	Br S of Grange X-Rds	Meath County Council	75.65	River Type 13	53.7473056	-6.5515528	Riffle Glide Pool	No	Q4	2	1		11/06/2015	2015																Few					Few
7	IE_EA_07D020140	DEVLIN'S_010	DEVLIN'S	RS07D020140	Br S of Grange X-Rds	Meath County Council	75.65	River Type 13	53.7473056	-6.5515528	Lowland Straight	No	Q4	2	1		22/08/2018	2018														Common			Few				Common
7	IE_EA_07D020300	DEVLIN'S_020	DEVLIN'S	RS07D020300	Ford u/s Mattock R confl	Meath County Council	36.88	River Type 12	53.7271671	-6.484			Q4	2			13/06/2012	2012		Few															Few					Common
7	IE_EA_07D020300	DEVLIN'S_020	DEVLIN'S	RS07D020300	Ford u/s Mattock R confl	Meath County Council	36.88	River Type 12	53.7271671	-6.484	Riffle Glide Pool	No	Q4	2	2		11/06/2015	2015																Few					Few
7	IE_EA_07D020300	DEVLIN'S_020	DEVLIN'S	RS07D020300	Ford u/s Mattock R confl	Meath County Council	36.88	River Type 12	53.7271671	-6.484	Lowland Straight	No	Q4	2	1		22/08/2018	2018														Few							Few
7	IE_EA_07D060030	D'ARCY'S CROSSROADS STREAM_010	D'ARCY'S CROSSROADS STREAM	RS07D060030	Snipe's Br	Meath County Council	88.62	River Type 32	53.6514612	-7.0569306			Q3-4	2			17/06/2009	2009		Few				Few	Few			Few				Few			Few					Excessive
7	IE_EA_07D060030	D'ARCY'S CROSSROADS STREAM_010	D'ARCY'S CROSSROADS STREAM	RS07D060030	Snipe's Br	Meath County Council	88.62	River Type 32	53.6514612	-7.0569306			Q3			3	06/09/2012	2012																	Few					Numerous
7	IE_EA_07D060030	D'ARCY'S CROSSROADS STREAM_010	D'ARCY'S CROSSROADS STREAM	RS07D060030	Snipe's Br	Meath County Council	88.62	River Type 32	53.6514612	-7.0569306	Riffle Glide Pool		Q3-4	2	1		10/06/2015	2015																Few					Dominant
7	IE_EA_07D060030	D'ARCY'S CROSSROADS STREAM_010	D'ARCY'S CROSSROADS STREAM	RS07D060030	Snipe's Br	Meath County Council	88.62	River Type 32	53.6514612	-7.0569306	Lowland Straight	No	Q3-4	2	1		31/07/2018	2018														Few							Dominant
7	IE_EA_07G020400	GLASH_010	GLASH	RS07G020200	GLASH - Br NW of Calfstown	Kildare County Council	74.58	River Type 31	53.3900964	-6.9584052			Q3	1			04/09/2012	2012								Few						Few								Dominant
7	IE_EA_07G020400	GLASH_010	GLASH	RS07G020300	GLASH - Br at Tanderagee Crossroads	Kildare County Council	74.58	River Type 31	53.3995008	-6.9547873			Q3	3	1		14/08/2012	2012														Few								Numerous
7	IE_EA_07G020400	GLASH_010	GLASH	RS07G020300	GLASH - Br at Tanderagee Crossroads	Kildare County Council	74.58	River Type 31	53.3995008	-6.9547873	Riffle Glide Pool	Yes	Q3	2	1		31/08/2015	2015														Few							Numerous
7	IE_EA_07G020400	GLASH_010	GLASH	RS07G020300	GLASH - Br at Tanderagee Crossroads	Kildare County Council	74.58	River Type 31	53.3995008	-6.9547873	Lowland Straight	No	Q3	2	1		19/07/2018	2018														Few			Few				Numerous
7	IE_EA_07G020400	GLASH_010	GLASH	RS07G020400	Clonuff Br	Kildare County Council	74.58	River Type 31	53.4135784	-6.961312			Q3	2	2		04/09/2012	2012														Few								Numerous
7	IE_EA_07G020400	GLASH_010	GLASH	RS07G020400	Clonuff Br	Kildare County Council	74.58	River Type 31	53.4135784	-6.961312	Riffle Glide Pool	Yes	Q2-3	2	0.5		31/08/2015	2015														Few							Few
7	IE_EA_07G020400	GLASH_010	GLASH	RS07G020400	Clonuff Br	Kildare County Council	74.58	River Type 31	53.4135784	-6.961312	Lowland Straight	No	Q3	2	1		18/07/2018	2018														Few			Few				Numerous
7	IE_EA_07G020600	GLASH_020	GLASH	RS07G020600	Br u/s Boyne R confl	Kildare County Council	67.71	River Type 31	53.4372065	-6.9923036			Q3	2			28/07/2009	2009														Few							Excessive										Few
7	IE_EA_07G020600	GLASH_020	GLASH	RS07G020600	Br u/s Boyne R confl	Kildare County Council	67.71	River Type 31	53.4372065	-6.9923036			Q3	2	1		15/08/2012	2012														Common	Few							Excessive
7	IE_EA_07G020600	GLASH_020	GLASH	RS07G020600	Br u/s Boyne R confl	Kildare County Council	67.71	River Type 31	53.4372065	-6.9923036	Riffle Glide Pool	No	Q3-4	2	1		18/06/2015	2015		Few														Few	Few				Common
7	IE_EA_07G020600	GLASH_020	GLASH	RS07G020600	Br u/s Boyne R confl	Kildare County Council	67.71	River Type 31	53.4372065	-6.9923036	Lowland Straight	No	Q3-4	2	1		18/07/2018	2018														Few							Dominant
7	IE_EA_07K010060	KINNEGAD_010	KINNEGAD	RS07K010060	Br SE of Cloonfad Ho	Westmeath County Council	76.34	River Type 31	53.4464875	-7.1605645			Q4	2			10/08/2009	2009														Few	Common						Numerous
7	IE_EA_07K010060	KINNEGAD_010	KINNEGAD	RS07K010060	Br SE of Cloonfad Ho	Westmeath County Council	76.34	River Type 31	53.4464875	-7.1605645			Q3-4	4			13/09/2012	2012								Few		Few				Few			Few					Dominant
7	IE_EA_07K010060	KINNEGAD_010	KINNEGAD	RS07K010060	Br SE of Cloonfad Ho	Westmeath County Council	76.34	River Type 31	53.4464875	-7.1605645	Riffle Glide Pool	No	Q3-4	4			23/06/2015	2015										Few				Few							Dominant
7	IE_EA_07K010060	KINNEGAD_010	KINNEGAD	RS07K010060	Br SE of Cloonfad Ho	Westmeath County Council	76.34	River Type 31	53.4464875	-7.1605645	Lowland Straight	No	Q3-4	2	0.5		18/07/2018	2018					Single									Few			Few				Numerous
7	IE_EA_07K010100	KINNEGAD_020	KINNEGAD	RS07K010100	Ballivor Rd Br Kinnegad	Meath County Council	70.17	River Type 31	53.4541045	-7.0920206			Q3-4	3			14/09/2012	2012														Few			Few					Numerous
7	IE_EA_07K010200	KINNEGAD_030	KINNEGAD	RS07K010200	Kilwarden Br	Westmeath County Council	68.62	River Type 31	53.4611373	-7.0626589			Q3-4				11/08/2009	2009														Few							Few										Single
7	IE_EA_07K010200	KINNEGAD_030	KINNEGAD	RS07K010200	Kilwarden Br	Westmeath County Council	68.62	River Type 31	53.4611373	-7.0626589			Q3-4			4	14/09/2012	2012								Few	Few													Numerous
7	IE_EA_07K010200	KINNEGAD_030	KINNEGAD	RS07K010200	Kilwarden Br	Westmeath County Council	68.62	River Type 31	53.4611373	-7.0626589	Riffle Glide Pool		Q3-4	2	1		23/06/2015	2015														Few			Few				Few
7	IE_EA_07K010200	KINNEGAD_030	KINNEGAD	RS07K010200	Kilwarden Br	Westmeath County Council	68.62	River Type 31	53.4611373	-7.0626589	Lowland Straight	No	Q3-4	2	1		18/07/2018	2018														Few	Few						Numerous										Few
7	IE_EA_07B040600	BOYNE_040	KINNEGAD	RS07K010300	Clonard Br	Meath County Council	63.76	River Type 31	53.449997	-7.0103472			Q4	2			14/09/2012	2012								Few	Few					Few								Dominant
7	IE_EA_07K020300	KNIGHTSBROOK_010	KNIGHTSBROOK	RS07K020300	Dangan Br	Meath County Council	71.92	River Type 31	53.5012758	-6.7449919			Q2-3	1			30/07/2009	2009																	Few					Few
7	IE_EA_07K020300	KNIGHTSBROOK_010	KNIGHTSBROOK	RS07K020300	Dangan Br	Meath County Council	71.92	River Type 31	53.5012758	-6.7449919			Q3	2			20/09/2012	2012		Few						Few									Few					Common
7	IE_EA_07K020300	KNIGHTSBROOK_010	KNIGHTSBROOK	RS07K020300	Dangan Br	Meath County Council	71.92	River Type 31	53.5012758	-6.7449919	Riffle Glide Pool		Q3	2	1		20/08/2015	2015																	Few				Common
7	IE_EA_07K020300	KNIGHTSBROOK_010	KNIGHTSBROOK	RS07K020300	Dangan Br	Meath County Council	71.92	River Type 31	53.5012758	-6.7449919	Riffle Glide Pool	No	Q3	2	1		07/08/2018	2018						Few								Few							Numerous
7	IE_EA_07K020400	KNIGHTSBROOK_020	KNIGHTSBROOK	RS07K020400	Br nr Laracor x-rds (R158)	Meath County Council	59.19	River Type 31	53.5280529	-6.7833816			Q3-4	2			30/07/2009	2009														Few			Few					Numerous
7	IE_EA_07K020400	KNIGHTSBROOK_020	KNIGHTSBROOK	RS07K020400	Br nr Laracor x-rds (R158)	Meath County Council	59.19	River Type 31	53.5280529	-6.7833816			Q4	2			12/06/2012	2012									Few					Few			Few					Dominant
7	IE_EA_07K020400	KNIGHTSBROOK_020	KNIGHTSBROOK	RS07K020400	Br nr Laracor x-rds (R158)	Meath County Council	59.19	River Type 31	53.5280529	-6.7833816	Lowland Straight	No	Q3-4	4	2		07/08/2018	2018							Few			Few				Few			Few				Dominant
7	IE_EA_07K020500	KNIGHTSBROOK_030	KNIGHTSBROOK	RS07K020490	347m US of 07K020500	Meath County Council	48.52	River Type 31	53.5472869	-6.7502142	Riffle Glide Pool	No	Q3	4	1		19/08/2015	2015										Few							Few				Dominant
7	IE_EA_07K020500	KNIGHTSBROOK_030	KNIGHTSBROOK	RS07K020500	Br u/s Boyne R confl	Meath County Council	48.52	River Type 31	53.5503112	-6.7490826			Q3	2	2		20/09/2012	2012		Few												Few								Numerous
7	IE_EA_07K020500	KNIGHTSBROOK_030	KNIGHTSBROOK	RS07K020500	Br u/s Boyne R confl	Meath County Council	48.52	River Type 31	53.5503112	-6.7490826	Riffle Glide Pool		Q3				19/08/2015	2015														Few			Few				Numerous
7	IE_EA_07K020500	KNIGHTSBROOK_030	KNIGHTSBROOK	RS07K020500	Br u/s Boyne R confl	Meath County Council	48.52	River Type 31	53.5503112	-6.7490826	Lowland Straight	No	Q3	2	1		07/08/2018	2018														Few							Numerous
7	IE_EA_07L010100	LISLEA_010	LISLEA	RS07L010100	Br u/s Lough Ramor	Cavan County Council	88.56	River Type 11	53.8214761	-7.054395			Q4	2			09/07/2009	2009										Few				Few			Few					Dominant									Few
7	IE_EA_07L010100	LISLEA_010	LISLEA	RS07L010100	Br u/s Lough Ramor	Cavan County Council	88.56	River Type 11	53.8214761	-7.054395			Q4	2			29/08/2012	2012														Few								Dominant									Few
7	IE_EA_07L010100	LISLEA_010	LISLEA	RS07L010100	Br u/s Lough Ramor	Cavan County Council	88.56	River Type 11	53.8214761	-7.054395	Riffle Glide Pool	Unknown	Q4	2	1		04/06/2015	2015																Few					Few
7	IE_EA_07L010100	LISLEA_010	LISLEA	RS07L010100	Br u/s Lough Ramor	Cavan County Council	88.56	River Type 11	53.8214761	-7.054395	Lowland Straight	No	Q4	2	1		15/08/2018	2018																	Few				Excessive
7	IE_EA_07L030040	Lough Lene-Adeel Stream_010	Lough Lene-Adeel Stream	RS07L030040	Br u/s Lough Adeel	Westmeath County Council	90.58	River Type 32	53.6620175	-7.1802909			Q3-4	2			27/07/2009	2009														Few			Few					Numerous
7	IE_EA_07L030040	Lough Lene-Adeel Stream_010	Lough Lene-Adeel Stream	RS07L030040	Br u/s Lough Adeel	Westmeath County Council	90.58	River Type 32	53.6620175	-7.1802909			Q3-4	2	1		05/09/2012	2012									Single	Common				Few								Dominant
7	IE_EA_07L030040	Lough Lene-Adeel Stream_010	Lough Lene-Adeel Stream	RS07L030040	Br u/s Lough Adeel	Westmeath County Council	90.58	River Type 32	53.6620175	-7.1802909	Riffle Glide Pool		Q3	4	2		24/08/2015	2015										Few											Numerous
7	IE_EA_07L030040	Lough Lene-Adeel Stream_010	Lough Lene-Adeel Stream	RS07L030040	Br u/s Lough Adeel	Westmeath County Council	90.58	River Type 32	53.6620175	-7.1802909	Lowland Straight	No	Q3-4	2	1		24/07/2018	2018					Single										Few						Dominant
7	IE_EA_07M010100	MATTOCK_010	MATTOCK	RS07M010020	MATTOCK - Phoenixtown Br (Pharnirtown Br)	Louth County Council	84.93	River Type 12	53.7674539	-6.5442656			Q5		2		11/06/2012	2012									Few					Few								Few
7	IE_EA_07M010100	MATTOCK_010	MATTOCK	RS07M010020	MATTOCK - Phoenixtown Br (Pharnirtown Br)	Louth County Council	84.93	River Type 12	53.7674539	-6.5442656	Riffle Glide Pool	No	Q4-5	3	2		11/06/2015	2015																Few					Few
7	IE_EA_07M010100	MATTOCK_010	MATTOCK	RS07M010020	MATTOCK - Phoenixtown Br (Pharnirtown Br)	Louth County Council	84.93	River Type 12	53.7674539	-6.5442656	Riffle Glide Pool	No	Q4	1	1		21/08/2018	2018														Few							Few
7	IE_EA_07M010100	MATTOCK_010	MATTOCK	RS07M010050	MATTOCK - Slane Rd Br Collon	Louth County Council	84.93	River Type 12	53.7755416	-6.4876095			Q3-4	2	2		13/06/2012	2012		Few								Few				Few			Few					Few
7	IE_EA_07M010100	MATTOCK_010	MATTOCK	RS07M010050	MATTOCK - Slane Rd Br Collon	Louth County Council	84.93	River Type 12	53.7755416	-6.4876095	Riffle Glide Pool	No	Q4	2	1		11/06/2015	2015
7	IE_EA_07M010100	MATTOCK_010	MATTOCK	RS07M010050	MATTOCK - Slane Rd Br Collon	Louth County Council	84.93	River Type 12	53.7755416	-6.4876095	Lowland Straight	No	Q4	2	1		21/08/2018	2018		Few								Few							Few				Numerous
7	IE_EA_07M010100	MATTOCK_010	MATTOCK	RS07M010100	Boyd's Br	Louth County Council	84.93	River Type 12	53.7665816	-6.4556306			Q4	2			04/08/2009	2009		Few												Few	Few							Few
7	IE_EA_07M010100	MATTOCK_010	MATTOCK	RS07M010100	Boyd's Br	Louth County Council	84.93	River Type 12	53.7665816	-6.4556306			Q4	3	2		13/06/2012	2012		Few													Few							Few
7	IE_EA_07M010100	MATTOCK_010	MATTOCK	RS07M010100	Boyd's Br	Louth County Council	84.93	River Type 12	53.7665816	-6.4556306	Riffle Glide Pool	No	Q3-4	4	5		11/06/2015	2015																Few	Few				Few
7	IE_EA_07M010100	MATTOCK_010	MATTOCK	RS07M010100	Boyd's Br	Louth County Council	84.93	River Type 12	53.7665816	-6.4556306	Lowland Straight	No	Q3-4	2	1		21/08/2018	2018									Few					Few			Few				Common
7	IE_EA_07M010220	MATTOCK_020	MATTOCK	RS07M010200	Wood Mill Br u/s Devlins R confl	Louth County Council	35.37	River Type 13	53.7322575	-6.4775743			Q3-4	2			04/08/2009	2009		Few												Few								Few
7	IE_EA_07M010220	MATTOCK_020	MATTOCK	RS07M010200	Wood Mill Br u/s Devlins R confl	Louth County Council	35.37	River Type 13	53.7322575	-6.4775743			Q3-4	2	2		13/06/2012	2012		Single								Few				Few	Few							Few
7	IE_EA_07M010220	MATTOCK_020	MATTOCK	RS07M010200	Wood Mill Br u/s Devlins R confl	Louth County Council	35.37	River Type 13	53.7322575	-6.4775743	Riffle Glide Pool	No	Q4	2	1		24/06/2015	2015		Few												Few							Few
7	IE_EA_07M010220	MATTOCK_020	MATTOCK	RS07M010200	Wood Mill Br u/s Devlins R confl	Louth County Council	35.37	River Type 13	53.7322575	-6.4775743	Lowland Straight	No	Q4	2	1		21/08/2018	2018														Few			Few				Few
7	IE_EA_07M010220	MATTOCK_020	MATTOCK	RS07M010220	MATTOCK - Ford at Devlin's River Confl	Louth County Council	35.37	River Type 13	53.726514	-6.4831401			Q3-4	2	2		04/08/2009	2009														Few	Few							Few
7	IE_EA_07M010220	MATTOCK_020	MATTOCK	RS07M010220	MATTOCK - Ford at Devlin's River Confl	Louth County Council	35.37	River Type 13	53.726514	-6.4831401			Q4	2	2		13/06/2012	2012		Few												Few								Common
7	IE_EA_07M010220	MATTOCK_020	MATTOCK	RS07M010220	MATTOCK - Ford at Devlin's River Confl	Louth County Council	35.37	River Type 13	53.726514	-6.4831401	Riffle Glide Pool	No	Q4	2	2		24/06/2015	2015														Few
7	IE_EA_07M010220	MATTOCK_020	MATTOCK	RS07M010220	MATTOCK - Ford at Devlin's River Confl	Louth County Council	35.37	River Type 13	53.726514	-6.4831401	Lowland Straight	No	Q4	2	1		21/08/2018	2018																	Few				Few
7	IE_EA_07M030070	MOYNALTY_010	MOYNALTY	RS07M030070	Cloggagh Br	Cavan County Council	121.44	River Type 12	53.8695962	-6.9725542			Q3-4	2			21/07/2009	2009									Few	Few				Few			Few					Numerous
7	IE_EA_07M030070	MOYNALTY_010	MOYNALTY	RS07M030070	Cloggagh Br	Cavan County Council	121.44	River Type 12	53.8695962	-6.9725542			Q4	2	1		27/06/2012	2012														Few	Few							Numerous
7	IE_EA_07M030070	MOYNALTY_010	MOYNALTY	RS07M030070	Cloggagh Br	Cavan County Council	121.44	River Type 12	53.8695962	-6.9725542	Riffle Glide Pool	No	Q4	2	1		08/06/2015	2015																Few	Few				Few
7	IE_EA_07M030070	MOYNALTY_010	MOYNALTY	RS07M030070	Cloggagh Br	Cavan County Council	121.44	River Type 12	53.8695962	-6.9725542	Lowland Straight	No	Q4	2	1		15/08/2018	2018														Few			Few				Few
7	IE_EA_07M030100	MOYNALTY_020	MOYNALTY	RS07M030100	MOYNALTY - Rathbourne's Br (Annesbrook Br)	Cavan County Council	96.23	River Type 12	53.8280691	-6.9342449			Q3-4			4	27/06/2012	2012														Few			Common
7	IE_EA_07M030100	MOYNALTY_020	MOYNALTY	RS07M030100	MOYNALTY - Rathbourne's Br (Annesbrook Br)	Cavan County Council	96.23	River Type 12	53.8280691	-6.9342449	Lowland Meandering		Q3-4			2	16/06/2015	2015									Few							Few	Common				Few
7	IE_EA_07M030100	MOYNALTY_020	MOYNALTY	RS07M030100	MOYNALTY - Rathbourne's Br (Annesbrook Br)	Cavan County Council	96.23	River Type 12	53.8280691	-6.9342449	Lowland Straight	No	Q3			8	15/08/2018	2018																	Few
7	IE_EA_07M030300	MOYNALTY_030	MOYNALTY	RS07M030200	Rosehill Br	Meath County Council	87.63	River Type 12	53.8106507	-6.9136669			Q3-4	2			21/09/2012	2012						Few			Few					Few			Few
7	IE_EA_07M030300	MOYNALTY_030	MOYNALTY	RS07M030300	Mullagh Br (Br d/s Rosehill Br)	Meath County Council	87.63	River Type 12	53.8015301	-6.9206692			Q3-4	2			21/07/2009	2009															Few		Few					Numerous
7	IE_EA_07M030300	MOYNALTY_030	MOYNALTY	RS07M030300	Mullagh Br (Br d/s Rosehill Br)	Meath County Council	87.63	River Type 12	53.8015301	-6.9206692			Q3	2			27/09/2012	2012								Few		Few				Few			Few
7	IE_EA_07M030300	MOYNALTY_030	MOYNALTY	RS07M030300	Mullagh Br (Br d/s Rosehill Br)	Meath County Council	87.63	River Type 12	53.8015301	-6.9206692	Riffle Glide Pool	No	Q2-3	4	2		08/06/2015	2015							Few								Few	Excessive
7	IE_EA_07M030300	MOYNALTY_030	MOYNALTY	RS07M030300	Mullagh Br (Br d/s Rosehill Br)	Meath County Council	87.63	River Type 12	53.8015301	-6.9206692	Lowland Straight	No	Q3	2	2		16/08/2018	2018							Numerous		Few					Few			Numerous				Few
7	IE_EA_07M030700	MOYNALTY_040	MOYNALTY	RS07M030600	Moynalty Br	Meath County Council	60.42	River Type 32	53.7884335	-6.8863354			Q3-4	3			21/07/2009	2009														Few								Numerous									Few
7	IE_EA_07M030700	MOYNALTY_040	MOYNALTY	RS07M030600	Moynalty Br	Meath County Council	60.42	River Type 32	53.7884335	-6.8863354			Q3	2			27/09/2012	2012		Common				Few		Common	Few					Few			Few
7	IE_EA_07M030700	MOYNALTY_040	MOYNALTY	RS07M030600	Moynalty Br	Meath County Council	60.42	River Type 32	53.7884335	-6.8863354	Riffle Glide Pool	No	Q3	2			08/06/2015	2015																Dominant	Few
7	IE_EA_07M030700	MOYNALTY_040	MOYNALTY	RS07M030600	Moynalty Br	Meath County Council	60.42	River Type 32	53.7884335	-6.8863354	Lowland Straight	No	Q3	2	1		16/08/2018	2018							Few							Few			Common
7	IE_EA_07M030800	MOYNALTY_050	MOYNALTY	RS07M030800	Carlanstown Br	Meath County Council	56.57	River Type 32	53.7571328	-6.8404548			Q4	2			21/07/2009	2009														Few			Few					Dominant
7	IE_EA_07M030800	MOYNALTY_050	MOYNALTY	RS07M030800	Carlanstown Br	Meath County Council	56.57	River Type 32	53.7571328	-6.8404548			Q3	2	1		27/09/2012	2012		Few				Few		Common	Single	Few				Common	Single		Few					Few
7	IE_EA_07M030800	MOYNALTY_050	MOYNALTY	RS07M030800	Carlanstown Br	Meath County Council	56.57	River Type 32	53.7571328	-6.8404548	Riffle Glide Pool	No	Q3	2	1		08/06/2015	2015					Few		Few									Numerous	Few
7	IE_EA_07M030800	MOYNALTY_050	MOYNALTY	RS07M030800	Carlanstown Br	Meath County Council	56.57	River Type 32	53.7571328	-6.8404548	Lowland Straight	No	Q3-4	2	1		16/08/2018	2018														Few	Few		Few				Few
7	IE_EA_07M030900	MOYNALTY_060	MOYNALTY	RS07M030900	Fyanstown Br	Meath County Council	49.09	River Type 31	53.7255421	-6.8022247			Q4	2			21/07/2009	2009														Few			Few					Common									Few
7	IE_EA_07M030900	MOYNALTY_060	MOYNALTY	RS07M030900	Fyanstown Br	Meath County Council	49.09	River Type 31	53.7255421	-6.8022247			Q3	2			11/10/2012	2012		Few												Few			Few					Few
7	IE_EA_07M030900	MOYNALTY_060	MOYNALTY	RS07M030900	Fyanstown Br	Meath County Council	49.09	River Type 31	53.7255421	-6.8022247	Lowland Meandering		Q3			2	16/06/2015	2015								Few	Few							Few	Common				Few
7	IE_EA_07M030900	MOYNALTY_060	MOYNALTY	RS07M030900	Fyanstown Br	Meath County Council	49.09	River Type 31	53.7255421	-6.8022247	Lowland Straight	No	Q3-4	2	1		16/08/2018	2018														Few							Common
7	IE_EA_07M040400	MILLTOWNPASS_010	MILLTOWNPASS	RS07M040400	Br in Milltownpass	Westmeath County Council	83.63	River Type 31	53.4413072	-7.244928			Q3	2			13/09/2012	2012										Few				Common								Excessive
7	IE_EA_07M040400	MILLTOWNPASS_010	MILLTOWNPASS	RS07M040400	Br in Milltownpass	Westmeath County Council	83.63	River Type 31	53.4413072	-7.244928	Riffle Glide Pool		Q3-4	2	1		25/08/2015	2015										Few				Few			Few				Common
7	IE_EA_07M040400	MILLTOWNPASS_010	MILLTOWNPASS	RS07M040400	Br in Milltownpass	Westmeath County Council	83.63	River Type 31	53.4413072	-7.244928	Lowland Straight	No	Q3	2	1		26/06/2018	2018										Few											Numerous
7	IE_EA_07M060400	MULLAGH LOUGH STREAM_010	MULLAGH LOUGH STREAM	RS07M060400	Br u/s Main Ch confl	Cavan County Council	87.75	River Type 12	53.8015254	-6.9224904			Q3-4	2			21/07/2009	2009															Few		Few					Dominant
7	IE_EA_07M060400	MULLAGH LOUGH STREAM_010	MULLAGH LOUGH STREAM	RS07M060400	Br u/s Main Ch confl	Cavan County Council	87.75	River Type 12	53.8015254	-6.9224904			Q3-4	2	2		30/08/2012	2012										Few												Excessive
7	IE_EA_07M060400	MULLAGH LOUGH STREAM_010	MULLAGH LOUGH STREAM	RS07M060400	Br u/s Main Ch confl	Cavan County Council	87.75	River Type 12	53.8015254	-6.9224904	Riffle Glide Pool	No	Q3-4	2	1		08/06/2015	2015										Few						Few					Dominant
7	IE_EA_07M060400	MULLAGH LOUGH STREAM_010	MULLAGH LOUGH STREAM	RS07M060400	Br u/s Main Ch confl	Cavan County Council	87.75	River Type 12	53.8015254	-6.9224904	Lowland Straight	No	Q3	2	1		16/08/2018	2018														Few							Numerous
7	IE_EA_07N010100	NADREEGEEL LOUGH STREAM_010	NADREEGEEL LOUGH STREAM	RS07N010100	Assan Br	Cavan County Council	110.49	River Type 12	53.9115271	-7.1575652			Q3-4	3			09/07/2009	2009									Single													Common
7	IE_EA_07N010100	NADREEGEEL LOUGH STREAM_010	NADREEGEEL LOUGH STREAM	RS07N010100	Assan Br	Cavan County Council	110.49	River Type 12	53.9115271	-7.1575652			Q4	3	2		26/06/2012	2012		Single												Few								Few
7	IE_EA_07N010100	NADREEGEEL LOUGH STREAM_010	NADREEGEEL LOUGH STREAM	RS07N010100	Assan Br	Cavan County Council	110.49	River Type 12	53.9115271	-7.1575652	Riffle Glide Pool	No	Q4	2	1		04/06/2015	2015															Few	Few					Few
7	IE_EA_07N010100	NADREEGEEL LOUGH STREAM_010	NADREEGEEL LOUGH STREAM	RS07N010100	Assan Br	Cavan County Council	110.49	River Type 12	53.9115271	-7.1575652	Lowland Straight	No	Q4	2	1		15/08/2018	2018														Few							Few
7	IE_EA_07N010500	NADREEGEEL LOUGH STREAM_020	NADREEGEEL LOUGH STREAM	RS07N010500	Br nr Cranadillon	Cavan County Council	91.46	River Type 12	53.8395473	-7.102515			Q4	3			09/07/2009	2009														Few			Few					Few								Few	Few
7	IE_EA_07N010500	NADREEGEEL LOUGH STREAM_020	NADREEGEEL LOUGH STREAM	RS07N010500	Br nr Cranadillon	Cavan County Council	91.46	River Type 12	53.8395473	-7.102515			Q4	2	1	3	26/06/2012	2012														Few			Few					Few
7	IE_EA_07N010500	NADREEGEEL LOUGH STREAM_020	NADREEGEEL LOUGH STREAM	RS07N010500	Br nr Cranadillon	Cavan County Council	91.46	River Type 12	53.8395473	-7.102515	Lowland Meandering	No	Q3-4		1	3	04/06/2015	2015									Few								Few				Few										Few
7	IE_EA_07N010500	NADREEGEEL LOUGH STREAM_020	NADREEGEEL LOUGH STREAM	RS07N010500	Br nr Cranadillon	Cavan County Council	91.46	River Type 12	53.8395473	-7.102515	Lowland Straight	No	Q3	2	1		15/08/2018	2018																					Few										Few
7	IE_EA_07R010090	RIVERSTOWN_010	RIVERSTOWN	RS07R010090	Br nr Knockmant	Westmeath County Council	87.05	River Type 31	53.5005373	-7.2034349			Q3-4	3			10/08/2009	2009								Single						Few							Common										Few
7	IE_EA_07R010090	RIVERSTOWN_010	RIVERSTOWN	RS07R010090	Br nr Knockmant	Westmeath County Council	87.05	River Type 31	53.5005373	-7.2034349			Q3-4	2			05/09/2012	2012														Common	Few		Few					Few
7	IE_EA_07R010090	RIVERSTOWN_010	RIVERSTOWN	RS07R010090	Br nr Knockmant	Westmeath County Council	87.05	River Type 31	53.5005373	-7.2034349	Riffle Glide Pool		Q3-4			2	25/08/2015	2015														Few			Few														Few
7	IE_EA_07R010090	RIVERSTOWN_010	RIVERSTOWN	RS07R010090	Br nr Knockmant	Westmeath County Council	87.05	River Type 31	53.5005373	-7.2034349	Lowland Straight	No	Q3-4			2	02/08/2018	2018														Few							Common
7	IE_EA_07R010200	RIVERSTOWN_020	RIVERSTOWN	RS07R010200	Br u/s Deel R confl	Westmeath County Council	71.74	River Type 32	53.5021831	-7.1082284			Q3-4	2			28/07/2009	2009														Few								Excessive
7	IE_EA_07R010200	RIVERSTOWN_020	RIVERSTOWN	RS07R010200	Br u/s Deel R confl	Westmeath County Council	71.74	River Type 32	53.5021831	-7.1082284			Q3-4	2	2		05/09/2012	2012		Single						Single						Few	Few		Few					Excessive
7	IE_EA_07R010200	RIVERSTOWN_020	RIVERSTOWN	RS07R010200	Br u/s Deel R confl	Westmeath County Council	71.74	River Type 32	53.5021831	-7.1082284	Riffle Glide Pool		Q3-4	2	1		24/08/2015	2015		Few								Few				Few			Few				Common
7	IE_EA_07R010200	RIVERSTOWN_020	RIVERSTOWN	RS07R010200	Br u/s Deel R confl	Westmeath County Council	71.74	River Type 32	53.5021831	-7.1082284	Lowland Straight	No	Q3-4	2	1		02/08/2018	2018		Few												Few	Few						Dominant
7	IE_EA_07R040300	ROCHFORTBRIDGE STREAM_010	ROCHFORTBRIDGE STREAM	RS07R040300	ROCHFORTBRIDGE STREAM - Br SE of Derry	Westmeath County Council	81.61	River Type 32	53.4224132	-7.3026393			Q3-4	2	1		13/09/2012	2012								Few						Common								Numerous
7	IE_EA_07R040300	ROCHFORTBRIDGE STREAM_010	ROCHFORTBRIDGE STREAM	RS07R040300	ROCHFORTBRIDGE STREAM - Br SE of Derry	Westmeath County Council	81.61	River Type 32	53.4224132	-7.3026393			Q3-4	2	2		25/08/2015	2015							Few							Few							Numerous
7	IE_EA_07R040300	ROCHFORTBRIDGE STREAM_010	ROCHFORTBRIDGE STREAM	RS07R040300	ROCHFORTBRIDGE STREAM - Br SE of Derry	Westmeath County Council	81.61	River Type 32	53.4224132	-7.3026393	Lowland Straight	No	Q3-4	2	0.5		26/06/2018	2018														Few			Few				Common
7	IE_EA_07S010300	SKANE_020	SKANE	RS07S010300	Athronan Br	Meath County Council	66.16	River Type 32	53.5406894	-6.6384127			Q3	2			30/07/2009	2009		Few												Common	Few							Numerous
7	IE_EA_07S010300	SKANE_020	SKANE	RS07S010300	Athronan Br	Meath County Council	66.16	River Type 32	53.5406894	-6.6384127			Q3	2	2		12/06/2012	2012		Few												Few	Few
7	IE_EA_07S010300	SKANE_020	SKANE	RS07S010300	Athronan Br	Meath County Council	66.16	River Type 32	53.5406894	-6.6384127	Riffle Glide Pool		Q3	2	1		17/08/2015	2015														Few	Few		Few				Few										Few
7	IE_EA_07S010300	SKANE_020	SKANE	RS07S010300	Athronan Br	Meath County Council	66.16	River Type 32	53.5406894	-6.6384127	Lowland Straight	No	Q3	2	1		09/08/2018	2018														Few			Few														Few
7	IE_EA_07S010510	SKANE_030	SKANE	RS07S010510	Br NE of Balgeeth	Meath County Council	54.11	River Type 32	53.5828705	-6.6539682			Q3	2			30/07/2009	2009																	Few					Excessive									Few
7	IE_EA_07S010510	SKANE_030	SKANE	RS07S010510	Br NE of Balgeeth	Meath County Council	54.11	River Type 32	53.5828705	-6.6539682			Q3-4	2			12/06/2012	2012		Single								Few							Few					Excessive
7	IE_EA_07S010510	SKANE_030	SKANE	RS07S010510	Br NE of Balgeeth	Meath County Council	54.11	River Type 32	53.5828705	-6.6539682	Riffle Glide Pool		Q3	4	1		17/08/2015	2015		Few												Few			Few				Common
7	IE_EA_07S010510	SKANE_030	SKANE	RS07S010510	Br NE of Balgeeth	Meath County Council	54.11	River Type 32	53.5828705	-6.6539682	Lowland Straight	No	Q3	2	1		09/08/2018	2018														Few			Common				Common										Few
7	IE_EA_07S010600	SKANE_040	SKANE	RS07S010600	Dowdstown Br	Meath County Council	42.8	River Type 32	53.6031208	-6.6344684			Q3	2			30/07/2009	2009		Single				Single								Common								Dominant
7	IE_EA_07S010600	SKANE_040	SKANE	RS07S010600	Dowdstown Br	Meath County Council	42.8	River Type 32	53.6031208	-6.6344684			Q3-4	2	2		12/06/2012	2012		Few															Few					Numerous
7	IE_EA_07S010600	SKANE_040	SKANE	RS07S010600	Dowdstown Br	Meath County Council	42.8	River Type 32	53.6031208	-6.6344684	Riffle Glide Pool		Q3	4	1		17/08/2015	2015																					Numerous
7	IE_EA_07S010600	SKANE_040	SKANE	RS07S010600	Dowdstown Br	Meath County Council	42.8	River Type 32	53.6031208	-6.6344684	Lowland Straight	No	Q3	2	0.5		09/08/2018	2018														Few			Few				Common
7	IE_EA_07S020065	STONYFORD_010	STONYFORD	RS07S020065	STONYFORD - Br SW of Ballinlough	Westmeath County Council	81.74	River Type 31	53.624706	-7.0632863			Q4	2	1		06/09/2012	2012										Few												Numerous									Single
7	IE_EA_07S020065	STONYFORD_010	STONYFORD	RS07S020065	STONYFORD - Br SW of Ballinlough	Westmeath County Council	81.74	River Type 31	53.624706	-7.0632863	Riffle Glide Pool		Q4	2	2		15/06/2015	2015										Few						Few	Few				Few
7	IE_EA_07S020065	STONYFORD_010	STONYFORD	RS07S020065	STONYFORD - Br SW of Ballinlough	Westmeath County Council	81.74	River Type 31	53.624706	-7.0632863	Lowland Straight	No	Q3-4	2	1		31/07/2018	2018										Few											Numerous
7	IE_EA_07S020075	STONYFORD_020	STONYFORD	RS07S020075	Stonestown Br (Br E of )Ballyhealy Lr	Westmeath County Council	73.58	River Type 31	53.6010866	-7.0360815			Q3-4	2			24/07/2009	2009																	Few					Numerous
7	IE_EA_07S020075	STONYFORD_020	STONYFORD	RS07S020075	Stonestown Br (Br E of )Ballyhealy Lr	Westmeath County Council	73.58	River Type 31	53.6010866	-7.0360815			Q3-4	2			30/08/2012	2012														Few								Excessive
7	IE_EA_07S020075	STONYFORD_020	STONYFORD	RS07S020075	Stonestown Br (Br E of )Ballyhealy Lr	Westmeath County Council	73.58	River Type 31	53.6010866	-7.0360815	Riffle Glide Pool		Q4	2	2		15/06/2015	2015																Few	Few				Common
7	IE_EA_07S020075	STONYFORD_020	STONYFORD	RS07S020075	Stonestown Br (Br E of )Ballyhealy Lr	Westmeath County Council	73.58	River Type 31	53.6010866	-7.0360815	Lowland Straight	No	Q3-4	2	1		31/07/2018	2018														Few			Few				Numerous
7	IE_EA_07S020100	STONYFORD_030	STONYFORD	RS07S020100	Br u/s Rathkenna Br	Westmeath County Council	67.22	River Type 32	53.55995	-6.9691296			Q3-4	2			23/07/2009	2009														Few			Few					Numerous
7	IE_EA_07S020100	STONYFORD_030	STONYFORD	RS07S020100	Br u/s Rathkenna Br	Westmeath County Council	67.22	River Type 32	53.55995	-6.9691296			Q3-4			3	07/09/2012	2012										Few				Few	Single							Dominant
7	IE_EA_07S020100	STONYFORD_030	STONYFORD	RS07S020100	Br u/s Rathkenna Br	Westmeath County Council	67.22	River Type 32	53.55995	-6.9691296	Lowland Meandering		Q4			2	15/06/2015	2015					Few				Few							Few	Few				Numerous
7	IE_EA_07S020100	STONYFORD_030	STONYFORD	RS07S020100	Br u/s Rathkenna Br	Westmeath County Council	67.22	River Type 32	53.55995	-6.9691296	Lowland Straight	No	Q3-4	1		2	31/07/2018	2018							Few							Few			Few				Few
7	IE_EA_07S020400	STONYFORD_040	STONYFORD	RS07S020400	Stonyford Br	Meath County Council	60.33	River Type 31	53.5241409	-6.8969294			Q3-4	3			23/07/2009	2009								Few									Few					Numerous
7	IE_EA_07S020400	STONYFORD_040	STONYFORD	RS07S020400	Stonyford Br	Meath County Council	60.33	River Type 31	53.5241409	-6.8969294			Q3-4	2		2	07/09/2012	2012								Few		Few				Few			Few					Numerous
7	IE_EA_07S020400	STONYFORD_040	STONYFORD	RS07S020400	Stonyford Br	Meath County Council	60.33	River Type 31	53.5241409	-6.8969294	Lowland Meandering	No	Q4			2	15/06/2015	2015																	Common				Few
7	IE_EA_07S020400	STONYFORD_040	STONYFORD	RS07S020400	Stonyford Br	Meath County Council	60.33	River Type 31	53.5241409	-6.8969294	Lowland Straight	No	Q3-4	2	1		01/08/2018	2018		Few												Few			Common				Few
7	IE_EA_07Y011100	YELLOW (Blackwater Kells)_020	YELLOW (BLACKWATER)	RS07Y011100	Br u/s Blackwater R confl	Meath County Council	40.49	River Type 22	53.6828595	-6.7351473			Q3	2			22/07/2009	2009														Few			Few					Dominant
7	IE_EA_07Y011100	YELLOW (Blackwater Kells)_020	YELLOW (BLACKWATER)	RS07Y011100	Br u/s Blackwater R confl	Meath County Council	40.49	River Type 22	53.6828595	-6.7351473			Q3	2	1		27/09/2012	2012										Few				Common								Numerous
7	IE_EA_07Y011100	YELLOW (Blackwater Kells)_020	YELLOW (BLACKWATER)	RS07Y011100	Br u/s Blackwater R confl	Meath County Council	40.49	River Type 22	53.6828595	-6.7351473	Riffle Glide Pool	No	Q3	2	1		24/06/2015	2015														Few							Excessive
7	IE_EA_07Y011100	YELLOW (Blackwater Kells)_020	YELLOW (BLACKWATER)	RS07Y011100	Br u/s Blackwater R confl	Meath County Council	40.49	River Type 22	53.6828595	-6.7351473	Lowland Straight	No	Q3	2			17/08/2018	2018																					Numerous
7	IE_EA_07Y020070	YELLOW (CASTLEJORDAN)_010	YELLOW (CASTLEJORDAN)	RS07Y020070	Br d/s Big R confl	Offaly County Council	79.37	River Type 31	53.3762248	-7.2532214			Q4	2			11/08/2009	2009									Single					Few			Few				Few
7	IE_EA_07Y020070	YELLOW (CASTLEJORDAN)_010	YELLOW (CASTLEJORDAN)	RS07Y020070	Br d/s Big R confl	Offaly County Council	79.37	River Type 31	53.3762248	-7.2532214			Q4	2			12/09/2012	2012														Few	Few							Numerous									Single
7	IE_EA_07Y020070	YELLOW (CASTLEJORDAN)_010	YELLOW (CASTLEJORDAN)	RS07Y020070	Br d/s Big R confl	Offaly County Council	79.37	River Type 31	53.3762248	-7.2532214			Q3-4	4	4		25/08/2015	2015														Few			Few				Common
7	IE_EA_07Y020070	YELLOW (CASTLEJORDAN)_010	YELLOW (CASTLEJORDAN)	RS07Y020070	Br d/s Big R confl	Offaly County Council	79.37	River Type 31	53.3762248	-7.2532214	Riffle Glide Pool	No	Q3-4	2	1		28/06/2018	2018														Few	Single						Numerous										Single
7	IE_EA_07Y020100	YELLOW (CASTLEJORDAN)_020	YELLOW (CASTLEJORDAN)	RS07Y020100	Garr Br	Offaly County Council	72.22	River Type 31	53.3796487	-7.2007504			Q3-4	2			11/08/2009	2009										Few				Common							Common
7	IE_EA_07Y020100	YELLOW (CASTLEJORDAN)_020	YELLOW (CASTLEJORDAN)	RS07Y020100	Garr Br	Offaly County Council	72.22	River Type 31	53.3796487	-7.2007504			Q3-4	2			12/09/2012	2012								Few	Few					Common								Numerous
7	IE_EA_07Y020100	YELLOW (CASTLEJORDAN)_020	YELLOW (CASTLEJORDAN)	RS07Y020100	Garr Br	Offaly County Council	72.22	River Type 31	53.3796487	-7.2007504	Riffle Glide Pool	Unknown	Q3-4	2			05/11/2014	2014							Few			Few				Few							Few
7	IE_EA_07Y020100	YELLOW (CASTLEJORDAN)_020	YELLOW (CASTLEJORDAN)	RS07Y020100	Garr Br	Offaly County Council	72.22	River Type 31	53.3796487	-7.2007504	Riffle Glide Pool	Yes	Q4			2	01/09/2015	2015														Common			Few				Few
7	IE_EA_07Y020100	YELLOW (CASTLEJORDAN)_020	YELLOW (CASTLEJORDAN)	RS07Y020100	Garr Br	Offaly County Council	72.22	River Type 31	53.3796487	-7.2007504	Riffle Glide Pool	No	Q4	2	1		28/06/2018	2018														Few			Few				Common
7	IE_EA_07Y020300	YELLOW (CASTLEJORDAN)_030	YELLOW (CASTLEJORDAN)	RS07Y020300	Clongall Br	Offaly County Council	68.08	River Type 31	53.3846804	-7.1064834			Q4				11/08/2009	2009														Few							Numerous										Few
7	IE_EA_07Y020300	YELLOW (CASTLEJORDAN)_030	YELLOW (CASTLEJORDAN)	RS07Y020300	Clongall Br	Offaly County Council	68.08	River Type 31	53.3846804	-7.1064834			Q4	2			13/09/2012	2012														Few	Few							Dominant
7	IE_EA_07Y020300	YELLOW (CASTLEJORDAN)_030	YELLOW (CASTLEJORDAN)	RS07Y020300	Clongall Br	Offaly County Council	68.08	River Type 31	53.3846804	-7.1064834	Lowland Meandering	No	Q4	2	1		28/06/2018	2018																					Few
8	IE_EA_08B012200	BALLYBOGHIL_010	BALLYBOGHIL	RS08B011900	Br S of Trallie Lodge	Fingal County Council	31.27	River Type 32	53.5396003	-6.3222077			Q2-3	2			07/07/2008	2008							Few		Few	Few				Few			Few					Dominant
8	IE_EA_08B012200	BALLYBOGHIL_010	BALLYBOGHIL	RS08B011900	Br S of Trallie Lodge	Fingal County Council	31.27	River Type 32	53.5396003	-6.3222077			Q3	1.5	1		29/07/2010	2010									Few								Few				Dominant
8	IE_EA_08B012200	BALLYBOGHIL_010	BALLYBOGHIL	RS08B011900	Br S of Trallie Lodge	Fingal County Council	31.27	River Type 32	53.5396003	-6.3222077	Riffle Glide Pool	No	Q3	2	1		17/07/2014	2014														Few			Few				Few
8	IE_EA_08B012200	BALLYBOGHIL_010	BALLYBOGHIL	RS08B011900	Br S of Trallie Lodge	Fingal County Council	31.27	River Type 32	53.5396003	-6.3222077	Riffle Glide Pool		Q2-3	2	2		19/06/2017	2017														Common			Few
8	IE_EA_08B012200	BALLYBOGHIL_010	BALLYBOGHIL	RS08B012200	Br in Ballyboghil	Fingal County Council	31.27	River Type 32	53.5201547	-6.2659233			Q3	2			02/07/2008	2008										Few				Few			Numerous					Common
8	IE_EA_08B012200	BALLYBOGHIL_010	BALLYBOGHIL	RS08B012200	Br in Ballyboghil	Fingal County Council	31.27	River Type 32	53.5201547	-6.2659233			Q3	2	1		29/07/2010	2010										Few											Excessive
8	IE_EA_08B012200	BALLYBOGHIL_010	BALLYBOGHIL	RS08B012200	Br in Ballyboghil	Fingal County Council	31.27	River Type 32	53.5201547	-6.2659233	Riffle Glide Pool	No	Q3	2	1		17/07/2014	2014		Single					Few							Few	Numerous						Numerous
8	IE_EA_08B012200	BALLYBOGHIL_010	BALLYBOGHIL	RS08B012200	Br in Ballyboghil	Fingal County Council	31.27	River Type 32	53.5201547	-6.2659233	Riffle Glide Pool		Q3	2	1		19/06/2017	2017		Few							Few					Few			Few				Few
8	IE_EA_08B020400	BROADMEADOW_010	BROADMEADOW	RS08B020400	Br 0.5km u/s Ashbourne Br	Meath County Council	63.81	River Type 31	53.5097473	-6.4029712			Q2-3	2			07/07/2008	2008		Common				Few	Few							Numerous			Few					Common
8	IE_EA_08B020400	BROADMEADOW_010	BROADMEADOW	RS08B020400	Br 0.5km u/s Ashbourne Br	Meath County Council	63.81	River Type 31	53.5097473	-6.4029712			Q3	2	1		28/07/2010	2010		Few															Few				Excessive
8	IE_EA_08B020400	BROADMEADOW_010	BROADMEADOW	RS08B020400	Br 0.5km u/s Ashbourne Br	Meath County Council	63.81	River Type 31	53.5097473	-6.4029712	Lowland Meandering	No	Q3	2	1		18/07/2014	2014		Few					Few							Common			Dominant				Few
8	IE_EA_08B020400	BROADMEADOW_010	BROADMEADOW	RS08B020400	Br 0.5km u/s Ashbourne Br	Meath County Council	63.81	River Type 31	53.5097473	-6.4029712	Riffle Glide Pool		Q3	2	1		21/06/2017	2017		Few															Few				Numerous
8	IE_EA_08B020600	BROADMEADOW_020	BROADMEADOW	RS08B020500	Milltown Br	Meath County Council	37.06	River Type 32	53.5047586	-6.3827579			Q3	2			07/07/2008	2008		Common				Few	Few		Few					Few			Dominant					Few
8	IE_EA_08B020600	BROADMEADOW_020	BROADMEADOW	RS08B020500	Milltown Br	Meath County Council	37.06	River Type 32	53.5047586	-6.3827579			Q3	2	1		28/07/2010	2010		Few					Few							Few			Dominant
8	IE_EA_08B020600	BROADMEADOW_020	BROADMEADOW	RS08B020500	Milltown Br	Meath County Council	37.06	River Type 32	53.5047586	-6.3827579	Lowland Meandering	No	Q3	2	1		18/07/2014	2014		Few					Few							Few			Numerous				Few
8	IE_EA_08B020600	BROADMEADOW_020	BROADMEADOW	RS08B020500	Milltown Br	Meath County Council	37.06	River Type 32	53.5047586	-6.3827579	Riffle Glide Pool		Q3	2			21/06/2017	2017														Few			Few				Few
8	IE_EA_08B020600	BROADMEADOW_020	BROADMEADOW	RS08B020500	Milltown Br	Meath County Council	37.06	River Type 32	53.5047586	-6.3827579	Riffle Glide Pool	No	Q3	3			15/08/2018	2018							Few							Few			Numerous				Few
8	IE_EA_08B020600	BROADMEADOW_020	BROADMEADOW	RS08B020600	WSW of Fieldstown Ho	Meath County Council	37.06	River Type 32	53.4909976	-6.3316229			Q3	2			02/07/2008	2008		Numerous				Few								Few			Few					Few
8	IE_EA_08B020600	BROADMEADOW_020	BROADMEADOW	RS08B020600	WSW of Fieldstown Ho	Meath County Council	37.06	River Type 32	53.4909976	-6.3316229			Q3	2	1		28/07/2010	2010		Numerous															Dominant
8	IE_EA_08B020600	BROADMEADOW_020	BROADMEADOW	RS08B020600	WSW of Fieldstown Ho	Meath County Council	37.06	River Type 32	53.4909976	-6.3316229	Lowland Meandering	No	Q3	2	1		18/07/2014	2014		Common					Few								Few		Common
8	IE_EA_08B020600	BROADMEADOW_020	BROADMEADOW	RS08B020600	WSW of Fieldstown Ho	Meath County Council	37.06	River Type 32	53.4909976	-6.3316229	Riffle Glide Pool		Q3	2	1		21/06/2017	2017		Few												Few			Common				Few
8	IE_EA_08B020600	BROADMEADOW_020	BROADMEADOW	RS08B020600	WSW of Fieldstown Ho	Meath County Council	37.06	River Type 32	53.4909976	-6.3316229	Riffle Glide Pool		Q3-4	3	1		15/08/2018	2018		Few								Few				Few			Numerous				Few
8	IE_EA_08B020700	BROADMEADOW_030	BROADMEADOW	RS08B020700	BROADMEADOW - Lispopple Br	Fingal County Council	24.36	River Type 32	53.4889897	-6.2851428			Q3	2	1		29/07/2010	2010		Few			Common												Dominant				Few
8	IE_EA_08B020700	BROADMEADOW_030	BROADMEADOW	RS08B020700	BROADMEADOW - Lispopple Br	Fingal County Council	24.36	River Type 32	53.4889897	-6.2851428	Lowland Meandering	No	Q3	2	1		18/07/2014	2014		Few					Few								Few		Common				Common
8	IE_EA_08B020700	BROADMEADOW_030	BROADMEADOW	RS08B020700	BROADMEADOW - Lispopple Br	Fingal County Council	24.36	River Type 32	53.4889897	-6.2851428	Lowland Meandering		Q3	2			21/06/2017	2017		Few												Few			Numerous				Few
8	IE_EA_08B020800	BROADMEADOW_040	BROADMEADOW	RS08B020800	Br nr Waterworks	Fingal County Council	4.81	River Type 32	53.4713889	-6.2202645			Q3	2			04/07/2008	2008		Numerous															Few					Few
8	IE_EA_08B020800	BROADMEADOW_040	BROADMEADOW	RS08B020800	Br nr Waterworks	Fingal County Council	4.81	River Type 32	53.4713889	-6.2202645			Q3	2	1		29/07/2010	2010		Common												Common			Dominant				Dominant
8	IE_EA_08B020800	BROADMEADOW_040	BROADMEADOW	RS08B020800	Br nr Waterworks	Fingal County Council	4.81	River Type 32	53.4713889	-6.2202645	Lowland Meandering		Q2-3	2	1		18/07/2014	2014		Common					Common							Few			Few
8	IE_EA_08B020800	BROADMEADOW_040	BROADMEADOW	RS08B020800	Br nr Waterworks	Fingal County Council	4.81	River Type 32	53.4713889	-6.2202645	Riffle Glide Pool		Q3	2			21/06/2017	2017		Few												Few			Few				Few
8	IE_EA_08B031600	BALLOUGH STREAM_020	BALLOUGH STREAM	RS08B031600	Corduff Br	Fingal County Council	5.58	River Type 32	53.5065747	-6.1924624			Q3	2			02/07/2008	2008		Few				Few			Few	Few				Few			Few					Single
8	IE_EA_08B031600	BALLOUGH STREAM_020	BALLOUGH STREAM	RS08B031600	Corduff Br	Fingal County Council	5.58	River Type 32	53.5065747	-6.1924624			Q3-4	2	1		29/07/2010	2010														Common							Few
8	IE_EA_08B031600	BALLOUGH STREAM_020	BALLOUGH STREAM	RS08B031600	Corduff Br	Fingal County Council	5.58	River Type 32	53.5065747	-6.1924624	Riffle Glide Pool	No	Q3	2	1		17/07/2014	2014														Single	Single
8	IE_EA_08B031600	BALLOUGH STREAM_020	BALLOUGH STREAM	RS08B031600	Corduff Br	Fingal County Council	5.58	River Type 32	53.5065747	-6.1924624	Riffle Glide Pool		Q3-4	2			22/06/2017	2017										Few							Few				Few
8	IE_EA_08D010080	DELVIN_010	DELVIN	RS08D010080	Br W of Naul	Fingal County Council	63.51	River Type 32	53.5839787	-6.3087948			Q3	2			10/06/2008	2008		Few								Few				Common			Few					Common
8	IE_EA_08D010080	DELVIN_010	DELVIN	RS08D010080	Br W of Naul	Fingal County Council	63.51	River Type 32	53.5839787	-6.3087948			Q3	2	2		10/08/2010	2010										Few				Common			Common				Numerous
8	IE_EA_08D010080	DELVIN_010	DELVIN	RS08D010080	Br W of Naul	Fingal County Council	63.51	River Type 32	53.5839787	-6.3087948	Lowland Meandering	No	Q3	2	1		17/07/2014	2014														Few	Few						Excessive
8	IE_EA_08D010080	DELVIN_010	DELVIN	RS08D010080	Br W of Naul	Fingal County Council	63.51	River Type 32	53.5839787	-6.3087948	Riffle Glide Pool		Q3	2			16/06/2017	2017		Few			Few									Few			Few				Few
8	IE_EA_08D010250	DELVIN_020	DELVIN	RS08D010250	Br NW of Forty Acres	Fingal County Council	36.99	River Type 32	53.61137	-6.2718053			Q3-4	2			10/06/2008	2008		Few					Few			Few				Numerous			Common					Few
8	IE_EA_08D010250	DELVIN_020	DELVIN	RS08D010250	Br NW of Forty Acres	Fingal County Council	36.99	River Type 32	53.61137	-6.2718053			Q3-4	2	2		10/08/2010	2010		Few					Few			Few				Few			Few				Few
8	IE_EA_08D010250	DELVIN_020	DELVIN	RS08D010250	Br NW of Forty Acres	Fingal County Council	36.99	River Type 32	53.61137	-6.2718053	Lowland Meandering	No	Q3-4	2	1		17/07/2014	2014							Few							Few	Common		Few				Dominant
8	IE_EA_08D010250	DELVIN_020	DELVIN	RS08D010250	Br NW of Forty Acres	Fingal County Council	36.99	River Type 32	53.61137	-6.2718053	Riffle Glide Pool		Q3-4	2	1		19/06/2017	2017														Few			Few				Few
8	IE_EA_08D010400	DELVIN_040	DELVIN	RS08D010400	Br nr Bridgefoot House	Meath County Council	11.05	River Type 12	53.6284988	-6.2299055			Q3	2			10/06/2008	2008		Few					Few							Dominant			Common					Few
8	IE_EA_08D010400	DELVIN_040	DELVIN	RS08D010400	Br nr Bridgefoot House	Meath County Council	11.05	River Type 12	53.6284988	-6.2299055			Q3	2			10/08/2010	2010																					Excessive
8	IE_EA_08D010400	DELVIN_040	DELVIN	RS08D010400	Br nr Bridgefoot House	Meath County Council	11.05	River Type 12	53.6284988	-6.2299055	Riffle Glide Pool	No	Q3	2	1		17/07/2014	2014		Few												Few	Numerous						Dominant
8	IE_EA_08D010400	DELVIN_040	DELVIN	RS08D010400	Br nr Bridgefoot House	Meath County Council	11.05	River Type 12	53.6284988	-6.2299055	Riffle Glide Pool		Q3	2	1		19/06/2017	2017					Few					Few							Few				Common
8	IE_EA_08D030300	DUNSHAUGHLIN STREAM_010	DUNSHAUGHLIN STREAM	RS08D030300	Cookstown Br	Meath County Council	68.09	River Type 31	53.5127983	-6.4179029			Q2	2			07/07/2008	2008														Common			Common					Few
8	IE_EA_08D030300	DUNSHAUGHLIN STREAM_010	DUNSHAUGHLIN STREAM	RS08D030300	Cookstown Br	Meath County Council	68.09	River Type 31	53.5127983	-6.4179029			Q3	2			20/10/2009	2009		Few						Few						Few			Few
8	IE_EA_08D030300	DUNSHAUGHLIN STREAM_010	DUNSHAUGHLIN STREAM	RS08D030300	Cookstown Br	Meath County Council	68.09	River Type 31	53.5127983	-6.4179029			Q3	1			28/07/2010	2010						Few				Few							Few				Excessive
8	IE_EA_08D030300	DUNSHAUGHLIN STREAM_010	DUNSHAUGHLIN STREAM	RS08D030300	Cookstown Br	Meath County Council	68.09	River Type 31	53.5127983	-6.4179029	Lowland Meandering	No	Q4	2	1		18/07/2014	2014		Single												Few			Numerous				Common
8	IE_EA_08D030300	DUNSHAUGHLIN STREAM_010	DUNSHAUGHLIN STREAM	RS08D030300	Cookstown Br	Meath County Council	68.09	River Type 31	53.5127983	-6.4179029	Riffle Glide Pool		Q3	4	2		26/06/2017	2017														Few							Dominant
8	IE_EA_08F010500	FAIRYHOUSE STREAM_010	FAIRYHOUSE STREAM	RS08F010500	Br at Donaghmore X-Rds	Meath County Council	55.93	River Type 31	53.4945175	-6.3713789			Q3	3			01/07/2008	2008		Few					Single							Common			Few
8	IE_EA_08F010500	FAIRYHOUSE STREAM_010	FAIRYHOUSE STREAM	RS08F010500	Br at Donaghmore X-Rds	Meath County Council	55.93	River Type 31	53.4945175	-6.3713789			Q3	2	1		28/07/2010	2010		Few					Few							Few			Dominant
8	IE_EA_08F010500	FAIRYHOUSE STREAM_010	FAIRYHOUSE STREAM	RS08F010500	Br at Donaghmore X-Rds	Meath County Council	55.93	River Type 31	53.4945175	-6.3713789	Lowland Meandering	No	Q3	2	1		18/07/2014	2014		Few												Few	Common		Common				Common
8	IE_EA_08H010200	HURLEY_010	HURLEY	RS08H010200	Br at Painestown	Meath County Council	65.52	River Type 32	53.5666501	-6.4838417			Q3	2			10/06/2008	2008		Common					Few			Few				Few			Few
8	IE_EA_08H010200	HURLEY_010	HURLEY	RS08H010200	Br at Painestown	Meath County Council	65.52	River Type 32	53.5666501	-6.4838417			Q3	2	1		29/07/2010	2010		Few					Few			Few				Few			Few
8	IE_EA_08H010200	HURLEY_010	HURLEY	RS08H010200	Br at Painestown	Meath County Council	65.52	River Type 32	53.5666501	-6.4838417	Lowland Meandering	No	Q3-4	3	1		17/07/2014	2014		Few													Few		Few
8	IE_EA_08H010200	HURLEY_010	HURLEY	RS08H010200	Br at Painestown	Meath County Council	65.52	River Type 32	53.5666501	-6.4838417	Riffle Glide Pool		Q3-4	4	3		16/06/2017	2017		Few					Few							Few			Few
8	IE_EA_08H010280	HURLEY_020	HURLEY	RS08H010280	Rathfeigh Old Bridge	Meath County Council	51.42	River Type 32	53.5985556	-6.4908379			Q3	2			10/06/2008	2008		Few							Few	Few				Few			Few					Few
8	IE_EA_08H010280	HURLEY_020	HURLEY	RS08H010280	Rathfeigh Old Bridge	Meath County Council	51.42	River Type 32	53.5985556	-6.4908379			Q4	2	1		29/07/2010	2010							Few			Few				Few			Few
8	IE_EA_08H010280	HURLEY_020	HURLEY	RS08H010280	Rathfeigh Old Bridge	Meath County Council	51.42	River Type 32	53.5985556	-6.4908379	Lowland Meandering	No	Q4	2	1		17/07/2014	2014										Few				Few	Few						Few
8	IE_EA_08H010280	HURLEY_020	HURLEY	RS08H010280	Rathfeigh Old Bridge	Meath County Council	51.42	River Type 32	53.5985556	-6.4908379	Riffle Glide Pool		Q4				16/06/2017	2017										Few							Few				Few
8	IE_EA_08H010400	HURLEY_030	HURLEY	RS08H010400	Just u/s Nanny R confl	Meath County Council	26.12	River Type 32	53.6284632	-6.434876			Q3-4	2			22/05/2008	2008		Few												Few	Few		Common					Few
8	IE_EA_08H010400	HURLEY_030	HURLEY	RS08H010400	Just u/s Nanny R confl	Meath County Council	26.12	River Type 32	53.6284632	-6.434876			Q3-4	1.5	2		09/08/2010	2010										Few				Few			Common				Few
8	IE_EA_08H010400	HURLEY_030	HURLEY	RS08H010400	Just u/s Nanny R confl	Meath County Council	26.12	River Type 32	53.6284632	-6.434876	Lowland Meandering		Q3-4	2	1		17/07/2014	2014															Numerous		Few				Dominant
8	IE_EA_08H010400	HURLEY_030	HURLEY	RS08H010400	Just u/s Nanny R confl	Meath County Council	26.12	River Type 32	53.6284632	-6.434876	Riffle Glide Pool		Q3-4				16/06/2017	2017																	Few				Few
8	IE_EA_08M020100	MOSNEY_010	MOSNEY	RS08M020100	Br S of Mosney Ho	Meath County Council	10.18	River Type 22	53.6613057	-6.2461943			Q3	2			10/06/2008	2008														Common								Dominant
8	IE_EA_08M020100	MOSNEY_010	MOSNEY	RS08M020100	Br S of Mosney Ho	Meath County Council	10.18	River Type 22	53.6613057	-6.2461943			Q3	2			10/08/2010	2010																					Dominant
8	IE_EA_08M020100	MOSNEY_010	MOSNEY	RS08M020100	Br S of Mosney Ho	Meath County Council	10.18	River Type 22	53.6613057	-6.2461943	Riffle Glide Pool	No	Q3	2	1		17/07/2014	2014														Common	Few		Few				Dominant
8	IE_EA_08M020100	MOSNEY_010	MOSNEY	RS08M020100	Br S of Mosney Ho	Meath County Council	10.18	River Type 22	53.6613057	-6.2461943	Riffle Glide Pool		Q3	2	2		15/06/2017	2017														Few			Few				Common
8	IE_EA_08N010110	NANNY (MEATH)_010	NANNY (MEATH)	RS08N010040	Folistown Br	Meath County Council	42.77	River Type 32	53.6360776	-6.5963997			Q3	2			22/05/2008	2008						Few				Few					Few		Few					Common
8	IE_EA_08N010110	NANNY (MEATH)_010	NANNY (MEATH)	RS08N010040	Folistown Br	Meath County Council	42.77	River Type 32	53.6360776	-6.5963997			Q3	2	2		09/08/2010	2010										Few				Few							Dominant
8	IE_EA_08N010110	NANNY (MEATH)_010	NANNY (MEATH)	RS08N010040	Folistown Br	Meath County Council	42.77	River Type 32	53.6360776	-6.5963997	Riffle Glide Pool	No	Q3	2	1		17/07/2014	2014										Single				Few	Few						Numerous
8	IE_EA_08N010110	NANNY (MEATH)_010	NANNY (MEATH)	RS08N010040	Folistown Br	Meath County Council	42.77	River Type 32	53.6360776	-6.5963997	Riffle Glide Pool		Q3	2	1		14/06/2017	2017										Few						Few					Numerous
8	IE_EA_08N010110	NANNY (MEATH)_010	NANNY (MEATH)	RS08N010110	East Br Kentstown	Meath County Council	42.77	River Type 32	53.6253799	-6.5234308			Q2-3	1.5			22/05/2008	2008						Few								Common			Common					Dominant
8	IE_EA_08N010110	NANNY (MEATH)_010	NANNY (MEATH)	RS08N010110	East Br Kentstown	Meath County Council	42.77	River Type 32	53.6253799	-6.5234308			Q3	2	2		09/08/2010	2010		Numerous				Few								Few							Excessive
8	IE_EA_08N010110	NANNY (MEATH)_010	NANNY (MEATH)	RS08N010110	East Br Kentstown	Meath County Council	42.77	River Type 32	53.6253799	-6.5234308	Lowland Meandering	No	Q3	2	1		17/07/2014	2014		Few																			Excessive
8	IE_EA_08N010110	NANNY (MEATH)_010	NANNY (MEATH)	RS08N010110	East Br Kentstown	Meath County Council	42.77	River Type 32	53.6253799	-6.5234308	Riffle Glide Pool		Q3	2			14/06/2017	2017		Few				Few	Few							Few			Few				Numerous
8	IE_EA_08N010280	NANNY (MEATH)_020	NANNY (MEATH)	RS08N010280	Br d/s Nanny Br	Meath County Council	27.36	River Type 32	53.6260653	-6.4468039			Q4	2			22/05/2008	2008						Few								Few	Few		Few					Common
8	IE_EA_08N010280	NANNY (MEATH)_020	NANNY (MEATH)	RS08N010280	Br d/s Nanny Br	Meath County Council	27.36	River Type 32	53.6260653	-6.4468039			Q3-4	2	2		09/08/2010	2010		Few								Few				Few							Common
8	IE_EA_08N010280	NANNY (MEATH)_020	NANNY (MEATH)	RS08N010280	Br d/s Nanny Br	Meath County Council	27.36	River Type 32	53.6260653	-6.4468039	Lowland Meandering	No	Q3	2	1		17/07/2014	2014		Single								Single					Few		Common				Dominant
8	IE_EA_08N010280	NANNY (MEATH)_020	NANNY (MEATH)	RS08N010280	Br d/s Nanny Br	Meath County Council	27.36	River Type 32	53.6260653	-6.4468039	Riffle Glide Pool		Q3-4	2	1		14/06/2017	2017					Few	Few	Few			Few				Few			Common				Few
8	IE_EA_08N010500	NANNY (MEATH)_040	NANNY (MEATH)	RS08N010500	Br NE of Bellewstown Ho	Meath County Council	15.23	River Type 32	53.6611264	-6.3763075			Q3	2			22/05/2008	2008		Few												Few			Numerous					Common
8	IE_EA_08N010500	NANNY (MEATH)_040	NANNY (MEATH)	RS08N010500	Br NE of Bellewstown Ho	Meath County Council	15.23	River Type 32	53.6611264	-6.3763075			Q3-4	2	2		09/08/2010	2010		Few												Few			Few				Excessive
8	IE_EA_08N010500	NANNY (MEATH)_040	NANNY (MEATH)	RS08N010500	Br NE of Bellewstown Ho	Meath County Council	15.23	River Type 32	53.6611264	-6.3763075	Riffle Glide Pool	No	Q3-4	2	1		17/07/2014	2014															Few		Few				Dominant
8	IE_EA_08N010500	NANNY (MEATH)_040	NANNY (MEATH)	RS08N010500	Br NE of Bellewstown Ho	Meath County Council	15.23	River Type 32	53.6611264	-6.3763075	Riffle Glide Pool		Q3-4	4	3		15/06/2017	2017					Few					Few				Few			Few				Dominant
8	IE_EA_08N010500	NANNY (MEATH)_040	NANNY (MEATH)	RS08N010500	Br NE of Bellewstown Ho	Meath County Council	15.23	River Type 32	53.6611264	-6.3763075	Riffle Glide Pool	No	Q3-4	3			15/08/2018	2018																	Few				Dominant
8	IE_EA_08N010700	NANNY (MEATH)_050	NANNY (MEATH)	RS08N010550	NANNY (MEATH) - Br u/s Beaumont Br	Meath County Council	1.9	River Type 32	53.6619255	-6.3673715	Riffle Glide Pool		Q3	2	2		05/09/2014	2014		Few					Few							Common							Excessive
8	IE_EA_08N010700	NANNY (MEATH)_050	NANNY (MEATH)	RS08N010550	NANNY (MEATH) - Br u/s Beaumont Br	Meath County Council	1.9	River Type 32	53.6619255	-6.3673715	Riffle Glide Pool		Q3	2			15/06/2017	2017										Few							Few				Dominant
8	IE_EA_08N010700	NANNY (MEATH)_050	NANNY (MEATH)	RS08N010550	NANNY (MEATH) - Br u/s Beaumont Br	Meath County Council	1.9	River Type 32	53.6619255	-6.3673715	Riffle Glide Pool	No	Q3	3			15/08/2018	2018										Few				Few			Few				Numerous
8	IE_EA_08N010700	NANNY (MEATH)_050	NANNY (MEATH)	RS08N010600	NANNY (MEATH) - Beaumont Br	Meath County Council	1.9	River Type 32	53.6650607	-6.3569451	Riffle Glide Pool		Q3	4			05/09/2014	2014														Few			Few				Few
8	IE_EA_08N010700	NANNY (MEATH)_050	NANNY (MEATH)	RS08N010600	NANNY (MEATH) - Beaumont Br	Meath County Council	1.9	River Type 32	53.6650607	-6.3569451	Riffle Glide Pool		Q3	4	3		15/06/2017	2017		Few					Few							Few			Few				Dominant
8	IE_EA_08N010700	NANNY (MEATH)_050	NANNY (MEATH)	RS08N010700	Br at Julianstown	Meath County Council	1.9	River Type 32	53.6707848	-6.2837665			Q3-4	2			22/05/2008	2008																	Few					Common
8	IE_EA_08N010700	NANNY (MEATH)_050	NANNY (MEATH)	RS08N010700	Br at Julianstown	Meath County Council	1.9	River Type 32	53.6707848	-6.2837665			Q3	2	1		10/08/2010	2010		Few					Few										Few				Excessive
8	IE_EA_08N010700	NANNY (MEATH)_050	NANNY (MEATH)	RS08N010700	Br at Julianstown	Meath County Council	1.9	River Type 32	53.6707848	-6.2837665	Lowland Meandering	No	Q3-4	2	1		17/07/2014	2014															Few		Common				Dominant
8	IE_EA_08N010700	NANNY (MEATH)_050	NANNY (MEATH)	RS08N010700	Br at Julianstown	Meath County Council	1.9	River Type 32	53.6707848	-6.2837665	Riffle Glide Pool	No	Q3				15/06/2017	2017		Few															Few				Excessive
8	IE_EA_08N010700	NANNY (MEATH)_050	NANNY (MEATH)	RS08N010700	Br at Julianstown	Meath County Council	1.9	River Type 32	53.6707848	-6.2837665	Riffle Glide Pool	No	Q3	3	1		15/08/2018	2018																	Common				Excessive
8	IE_EA_08R010150	RATOATH STREAM_010	RATOATH STREAM	RS08R010150	Br in Ratoath	Meath County Council	83.7	River Type 31	53.5046252	-6.4646315			Q2-3	2.5			03/07/2008	2008		Few												Few			Few					Excessive
8	IE_EA_08R010150	RATOATH STREAM_010	RATOATH STREAM	RS08R010150	Br in Ratoath	Meath County Council	83.7	River Type 31	53.5046252	-6.4646315			Q3	1.5			28/07/2010	2010					Few									Common							Common
8	IE_EA_08R010150	RATOATH STREAM_010	RATOATH STREAM	RS08R010150	Br in Ratoath	Meath County Council	83.7	River Type 31	53.5046252	-6.4646315	Intermediate		Q3	2	1		18/07/2014	2014		Few												Few	Few						Dominant
8	IE_EA_08R010150	RATOATH STREAM_010	RATOATH STREAM	RS08R010150	Br in Ratoath	Meath County Council	83.7	River Type 31	53.5046252	-6.4646315	Riffle Glide Pool	No	Q3	2	1		19/06/2017	2017		Few												Common			Common				Few
8	IE_EA_08W010050	WARD_010	WARD	RS08W010025	WARD - (E) Br S of Priest Town Ho	Meath County Council	72.29	River Type 31	53.4479923	-6.4085055			Q3	2			01/07/2008	2008														Few			Few					Dominant
8	IE_EA_08W010070	WARD_020	WARD	RS08W010070	Coolatrath Br	Meath County Council	66.19	River Type 31	53.4496898	-6.3436455			Q2-3	2			24/10/2007	2007									Single								Dominant					Few
8	IE_EA_08W010070	WARD_020	WARD	RS08W010070	Coolatrath Br	Meath County Council	66.19	River Type 31	53.4496898	-6.3436455			Q2-3	2			01/07/2008	2008							Few							Few			Common					Excessive
8	IE_EA_08W010070	WARD_020	WARD	RS08W010070	Coolatrath Br	Meath County Council	66.19	River Type 31	53.4496898	-6.3436455			Q3	2	1		27/07/2010	2010		Few					Few														Dominant
8	IE_EA_08W010070	WARD_020	WARD	RS08W010070	Coolatrath Br	Meath County Council	66.19	River Type 31	53.4496898	-6.3436455	Lowland Meandering	No	Q3	2	1		18/07/2014	2014														Few			Few				Dominant
8	IE_EA_08W010070	WARD_020	WARD	RS08W010070	Coolatrath Br	Meath County Council	66.19	River Type 31	53.4496898	-6.3436455	Riffle Glide Pool		Q3-4	2	2		22/06/2017	2017		Common			Few									Few			Few				Few
8	IE_EA_08W010300	WARD_030	WARD	RS08W010300	Br N of Killeek	Fingal County Council	46.92	River Type 31	53.455123	-6.2755729			Q3	2			02/07/2008	2008		Few															Few
8	IE_EA_08W010300	WARD_030	WARD	RS08W010300	Br N of Killeek	Fingal County Council	46.92	River Type 31	53.455123	-6.2755729			Q3	2	1		27/07/2010	2010					Few												Numerous				Few
8	IE_EA_08W010300	WARD_030	WARD	RS08W010300	Br N of Killeek	Fingal County Council	46.92	River Type 31	53.455123	-6.2755729	Riffle Glide Pool	No	Q4	2	1		18/07/2014	2014										Single					Few						Dominant
8	IE_EA_08W010300	WARD_030	WARD	RS08W010300	Br N of Killeek	Fingal County Council	46.92	River Type 31	53.455123	-6.2755729	Riffle Glide Pool		Q4	2	2		22/06/2017	2017		Few												Few			Few				Few
8	IE_EA_08W010610	WARD_040	WARD	RS08W010610	Br d/s Scotchstone Br	Fingal County Council	9.24	River Type 32	53.4647354	-6.2173449			Q3	2			04/07/2008	2008														Few			Few					Few
8	IE_EA_08W010610	WARD_040	WARD	RS08W010610	Br d/s Scotchstone Br	Fingal County Council	9.24	River Type 32	53.4647354	-6.2173449			Q3	2	1		28/07/2010	2010					Few		Few							Common							Common
8	IE_EA_08W010610	WARD_040	WARD	RS08W010610	Br d/s Scotchstone Br	Fingal County Council	9.24	River Type 32	53.4647354	-6.2173449	Riffle Glide Pool	No	Q3	2	1		18/07/2014	2014														Few	Numerous		Few				Numerous
8	IE_EA_08W010610	WARD_040	WARD	RS08W010610	Br d/s Scotchstone Br	Fingal County Council	9.24	River Type 32	53.4647354	-6.2173449	Riffle Glide Pool		Q3	2	2		22/06/2017	2017							Few							Few			Few				Few
9	IE_EA_09K010060	KING'S (LIFFEY)_010	ANNALECKA BROOK	RS09A010100	Annalecka Br	Wicklow County Council	244.62	River Type 14	53.0569008	-6.4247897			Q4-5	3			18/04/2007	2007
9	IE_EA_09K010060	KING'S (LIFFEY)_010	ANNALECKA BROOK	RS09A010100	Annalecka Br	Wicklow County Council	244.62	River Type 14	53.0569008	-6.4247897			Q3-4	2	1		08/07/2010	2010														Few			Few
9	IE_EA_09K010060	KING'S (LIFFEY)_010	ANNALECKA BROOK	RS09A010100	Annalecka Br	Wicklow County Council	244.62	River Type 14	53.0569008	-6.4247897			Q4	5			16/08/2013	2013																	Common
9	IE_EA_09K010060	KING'S (LIFFEY)_010	ANNALECKA BROOK	RS09A010100	Annalecka Br	Wicklow County Council	244.62	River Type 14	53.0569008	-6.4247897	Riffle Glide Pool		Q4	2	1		30/08/2016	2016														Few
9	IE_EA_09B020300	BRITTAS_010	BRITTAS	RS09B020100	Br NE of Talbotstown House	South Dublin County Council	222.06	River Type 14	53.2311125	-6.4192709			Q3-4	2			30/04/2007	2007										Few												Numerous
9	IE_EA_09B020300	BRITTAS_010	BRITTAS	RS09B020100	Br NE of Talbotstown House	South Dublin County Council	222.06	River Type 14	53.2311125	-6.4192709			Q3-4	2	1		15/07/2010	2010															Few						Numerous
9	IE_EA_09B020300	BRITTAS_010	BRITTAS	RS09B020100	Br NE of Talbotstown House	South Dublin County Council	222.06	River Type 14	53.2311125	-6.4192709			Q3-4				19/08/2013	2013																						Dominant									Few
9	IE_EA_09B020300	BRITTAS_010	BRITTAS	RS09B020100	Br NE of Talbotstown House	South Dublin County Council	222.06	River Type 14	53.2311125	-6.4192709	Riffle Glide Pool		Q4	2	1		26/08/2016	2016															Few		Few				Numerous
9	IE_EA_09B020300	BRITTAS_010	BRITTAS	RS09B020300	BRITTAS - Br NNE of Moanaspick	South Dublin County Council	222.06	River Type 14	53.2270281	-6.4574615			Q3-4	2	1		15/07/2010	2010																					Numerous
9	IE_EA_09B020300	BRITTAS_010	BRITTAS	RS09B020300	BRITTAS - Br NNE of Moanaspick	South Dublin County Council	222.06	River Type 14	53.2270281	-6.4574615			Q4	4			19/08/2013	2013										Few							Few					Dominant									Few
9	IE_EA_09B020300	BRITTAS_010	BRITTAS	RS09B020300	BRITTAS - Br NNE of Moanaspick	South Dublin County Council	222.06	River Type 14	53.2270281	-6.4574615	Riffle Glide Pool		Q4	2	1		26/08/2016	2016										Few					Few		Few				Dominant
9	IE_EA_09B020500	BRITTAS_020	BRITTAS	RS09B020500	Kilbride Br	Wicklow County Council	202.59	River Type 13	53.2027458	-6.4621376			Q4	2			19/04/2007	2007																						Few									Few
9	IE_EA_09B020500	BRITTAS_020	BRITTAS	RS09B020500	Kilbride Br	Wicklow County Council	202.59	River Type 13	53.2027458	-6.4621376			Q4	2	1		15/07/2010	2010																	Few				Common										Few
9	IE_EA_09B020500	BRITTAS_020	BRITTAS	RS09B020500	Kilbride Br	Wicklow County Council	202.59	River Type 13	53.2027458	-6.4621376			Q3-4	4			19/08/2013	2013																	Few					Dominant									Few
9	IE_EA_09B020500	BRITTAS_020	BRITTAS	RS09B020500	Kilbride Br	Wicklow County Council	202.59	River Type 13	53.2027458	-6.4621376	Riffle Glide Pool		Q3-4	2	1		25/08/2016	2016										Few				Few							Common										Single
9	IE_EA_09B030100	BALLYDONNELL BROOK_010	BALLYDONNELL BROOK	RS09B030100	Ballylow Br	Wicklow County Council	239.85	River Type 14	53.1568456	-6.4151148			Q5	2			19/04/2007	2007														Few
9	IE_EA_09B030100	BALLYDONNELL BROOK_010	BALLYDONNELL BROOK	RS09B030100	Ballylow Br	Wicklow County Council	239.85	River Type 14	53.1568456	-6.4151148			Q4	2	1		09/07/2010	2010																	Few
9	IE_EA_09B030100	BALLYDONNELL BROOK_010	BALLYDONNELL BROOK	RS09B030100	Ballylow Br	Wicklow County Council	239.85	River Type 14	53.1568456	-6.4151148			Q4				19/08/2013	2013															Few		Few
9	IE_EA_09B030100	BALLYDONNELL BROOK_010	BALLYDONNELL BROOK	RS09B030100	Ballylow Br	Wicklow County Council	239.85	River Type 14	53.1568456	-6.4151148	Riffle Glide Pool		Q3-4	2	1		25/08/2016	2016															Few		Few
9	IE_EA_09B040100	BALLYLOW BROOK_010	BALLYLOW BROOK	RS09B040100	Br u/s Ballydonnell Brook confl	Wicklow County Council	243.39	River Type 14	53.1601657	-6.4032201			Q4	2			19/04/2007	2007																	Few
9	IE_EA_09B040100	BALLYLOW BROOK_010	BALLYLOW BROOK	RS09B040100	Br u/s Ballydonnell Brook confl	Wicklow County Council	243.39	River Type 14	53.1601657	-6.4032201			Q4	2	1		09/07/2010	2010																	Common
9	IE_EA_09B040100	BALLYLOW BROOK_010	BALLYLOW BROOK	RS09B040100	Br u/s Ballydonnell Brook confl	Wicklow County Council	243.39	River Type 14	53.1601657	-6.4032201			Q4	5			19/08/2013	2013																Few	Few
9	IE_EA_09B040100	BALLYLOW BROOK_010	BALLYLOW BROOK	RS09B040100	Br u/s Ballydonnell Brook confl	Wicklow County Council	243.39	River Type 14	53.1601657	-6.4032201	Riffle Glide Pool		Q4-5	2	1		25/08/2016	2016
9	IE_EA_09B080200	BALLINAGEE_010	BALLINAGEE	RS09B080200	Ballinagee Br	Wicklow County Council	261.89	River Type 14	53.0620491	-6.4541395			Q4	2			18/04/2007	2007															Few		Few
9	IE_EA_09B080200	BALLINAGEE_010	BALLINAGEE	RS09B080200	Ballinagee Br	Wicklow County Council	261.89	River Type 14	53.0620491	-6.4541395			Q4	2	1		09/08/2010	2010										Few							Few
9	IE_EA_09B080200	BALLINAGEE_010	BALLINAGEE	RS09B080200	Ballinagee Br	Wicklow County Council	261.89	River Type 14	53.0620491	-6.4541395			Q4	3			19/08/2013	2013										Few					Single		Few
9	IE_EA_09B080200	BALLINAGEE_010	BALLINAGEE	RS09B080200	Ballinagee Br	Wicklow County Council	261.89	River Type 14	53.0620491	-6.4541395	Riffle Glide Pool		Q4	2	1		30/08/2016	2016														Few
9	IE_EA_09C020100	CAMAC_010	CAMAC	RS09C020100	Br 1 km SW (u/s) of Saggart	South Dublin County Council	130.81	River Type 13	53.2748303	-6.4495226			Q4-5	2			10/05/2007	2007		Few								Few												Few
9	IE_EA_09C020100	CAMAC_010	CAMAC	RS09C020100	Br 1 km SW (u/s) of Saggart	South Dublin County Council	130.81	River Type 13	53.2748303	-6.4495226			Q4	2	2		23/07/2010	2010		Few								Few
9	IE_EA_09C020100	CAMAC_010	CAMAC	RS09C020100	Br 1 km SW (u/s) of Saggart	South Dublin County Council	130.81	River Type 13	53.2748303	-6.4495226			Q4				18/08/2013	2013										Few					Single		Few					Numerous									Few
9	IE_EA_09C020100	CAMAC_010	CAMAC	RS09C020100	Br 1 km SW (u/s) of Saggart	South Dublin County Council	130.81	River Type 13	53.2748303	-6.4495226	Riffle Glide Pool		Q4	2	1		22/06/2016	2016														Few	Few						Few
9	IE_EA_09C020250	CAMAC_020	CAMAC	RS09C020250	Br SE of Baldonnell Ho	South Dublin County Council	83.69	River Type 33	53.3030849	-6.4260704			Q3	2			10/05/2007	2007							Few			Few				Dominant			Few					Single
9	IE_EA_09C020250	CAMAC_020	CAMAC	RS09C020250	Br SE of Baldonnell Ho	South Dublin County Council	83.69	River Type 33	53.3030849	-6.4260704			Q3-4	2	1		23/07/2010	2010														Few			Few				Few
9	IE_EA_09C020250	CAMAC_020	CAMAC	RS09C020250	Br SE of Baldonnell Ho	South Dublin County Council	83.69	River Type 33	53.3030849	-6.4260704			Q3-4				18/08/2013	2013															Few							Dominant									Few
9	IE_EA_09C020250	CAMAC_020	CAMAC	RS09C020250	Br SE of Baldonnell Ho	South Dublin County Council	83.69	River Type 33	53.3030849	-6.4260704	Riffle Glide Pool		Q3-4	2	1		22/06/2016	2016														Few			Few				Numerous
9	IE_EA_09C020310	CAMAC_030	CAMAC	RS09C020310	Riversdale Estate Br	South Dublin County Council	57.18	River Type 33	53.3239024	-6.3906568			Q3	2			10/05/2007	2007							Few																								Few
9	IE_EA_09C020310	CAMAC_030	CAMAC	RS09C020310	Riversdale Estate Br	South Dublin County Council	57.18	River Type 33	53.3239024	-6.3906568			Q3	2	1		23/07/2010	2010										Few																					Few
9	IE_EA_09C020310	CAMAC_030	CAMAC	RS09C020310	Riversdale Estate Br	South Dublin County Council	57.18	River Type 33	53.3239024	-6.3906568			Q3				18/08/2013	2013		Few													Common							Dominant									Common
9	IE_EA_09C020310	CAMAC_030	CAMAC	RS09C020310	Riversdale Estate Br	South Dublin County Council	57.18	River Type 33	53.3239024	-6.3906568	Riffle Glide Pool		Q3	2	1		22/06/2016	2016		Few												Few							Dominant
9	IE_EA_09C020500	CAMAC_040	CAMAC	RS09C020500	Camac Close Emmet Rd	South Dublin County Council	20.38	River Type 32	53.3394036	-6.3188518			Q2	1			11/05/2007	2007		Few												Common			Few
9	IE_EA_09C020500	CAMAC_040	CAMAC	RS09C020500	Camac Close Emmet Rd	South Dublin County Council	20.38	River Type 32	53.3394036	-6.3188518			Q2-3	3			28/10/2008	2008		Few					Few							Numerous	Single		Few					Single
9	IE_EA_09C020500	CAMAC_040	CAMAC	RS09C020500	Camac Close Emmet Rd	South Dublin County Council	20.38	River Type 32	53.3394036	-6.3188518			Q3	2	1		23/07/2010	2010																	Few
9	IE_EA_09C020500	CAMAC_040	CAMAC	RS09C020500	Camac Close Emmet Rd	South Dublin County Council	20.38	River Type 32	53.3394036	-6.3188518			Q3	4	1.5		18/08/2013	2013										Few						Common	Common
9	IE_EA_09C020500	CAMAC_040	CAMAC	RS09C020500	Camac Close Emmet Rd	South Dublin County Council	20.38	River Type 32	53.3394036	-6.3188518	Riffle Glide Pool		Q3	2	1		22/06/2016	2016		Few												Few			Few				Few
9	IE_EA_09C030300	CLONSHANBO_010	CLONSHANBO	RS09C030300	Baltracey Br	Kildare County Council	70.88	River Type 31	53.3483421	-6.6906834			Q3	1			03/05/2007	2007		Few					Few										Numerous					Few
9	IE_EA_09C030300	CLONSHANBO_010	CLONSHANBO	RS09C030300	Baltracey Br	Kildare County Council	70.88	River Type 31	53.3483421	-6.6906834			Q3	1	2		09/07/2010	2010		Few												Few							Excessive
9	IE_EA_09C030300	CLONSHANBO_010	CLONSHANBO	RS09C030300	Baltracey Br	Kildare County Council	70.88	River Type 31	53.3483421	-6.6906834			Q3				20/08/2013	2013							Few			Few												Excessive
9	IE_EA_09C030300	CLONSHANBO_010	CLONSHANBO	RS09C030300	Baltracey Br	Kildare County Council	70.88	River Type 31	53.3483421	-6.6906834	Riffle Glide Pool		Q3	2	1		29/06/2016	2016		Few					Few							Few			Common				Numerous
9	IE_EA_09C030600	CLONSHANBO_020	CLONSHANBO	RS09C030600	Br u/s Lyreen R confl	Kildare County Council	66.06	River Type 31	53.3515581	-6.6645859			Q3	2	2		21/07/2010	2010														Few							Excessive
9	IE_EA_09C030600	CLONSHANBO_020	CLONSHANBO	RS09C030600	Br u/s Lyreen R confl	Kildare County Council	66.06	River Type 31	53.3515581	-6.6645859			Q3				20/08/2013	2013														Few								Excessive
9	IE_EA_09C030600	CLONSHANBO_020	CLONSHANBO	RS09C030600	Br u/s Lyreen R confl	Kildare County Council	66.06	River Type 31	53.3515581	-6.6645859	Riffle Glide Pool		Q3	2	1		29/06/2016	2016														Few							Excessive
9	IE_EA_09C040100	COCK BROOK_010	COCK BROOK	RS09C040100	Br NW of Kilmore	Wicklow County Council	199.21	River Type 14	53.1201411	-6.4745972			Q4-5	2			18/04/2007	2007																	Few
9	IE_EA_09C040100	COCK BROOK_010	COCK BROOK	RS09C040100	Br NW of Kilmore	Wicklow County Council	199.21	River Type 14	53.1201411	-6.4745972			Q4-5	2	3		09/07/2010	2010										Few				Few			Few
9	IE_EA_09C040100	COCK BROOK_010	COCK BROOK	RS09C040100	Br NW of Kilmore	Wicklow County Council	199.21	River Type 14	53.1201411	-6.4745972			Q4-5				19/08/2013	2013																	Few
9	IE_EA_09C040100	COCK BROOK_010	COCK BROOK	RS09C040100	Br NW of Kilmore	Wicklow County Council	199.21	River Type 14	53.1201411	-6.4745972	Riffle Glide Pool		Q4-5	2	1		26/08/2016	2016
9	IE_EA_09C040100	COCK BROOK_010	COCK BROOK	RS09C040100	Br NW of Kilmore	Wicklow County Council	199.21	River Type 14	53.1201411	-6.4745972	Riffle Glide Pool		Q4-5	1.5	1		11/06/2018	2018															Few		Few
9	IE_EA_09D010010	DODDER_010	DODDER	RS09D010010	DODDER - 1.3 km u/s Reservoir u/s distributary	South Dublin County Council	211.07	River Type 14	53.2205652	-6.3370912			Q4	3	3		23/07/2010	2010																	Common
9	IE_EA_09D010010	DODDER_010	DODDER	RS09D010010	DODDER - 1.3 km u/s Reservoir u/s distributary	South Dublin County Council	211.07	River Type 14	53.2205652	-6.3370912			Q4				22/08/2013	2013																	Few					Common
9	IE_EA_09D010010	DODDER_010	DODDER	RS09D010010	DODDER - 1.3 km u/s Reservoir u/s distributary	South Dublin County Council	211.07	River Type 14	53.2205652	-6.3370912	Riffle Glide Pool		Q4	2	1		08/09/2016	2016																	Few
9	IE_EA_09D010100	DODDER_020	DODDER	RS09D010100	U/s Piperstown St	South Dublin County Council	124.64	River Type 14	53.252911	-6.3692433			Q4	2			11/05/2007	2007
9	IE_EA_09D010100	DODDER_020	DODDER	RS09D010100	U/s Piperstown St	South Dublin County Council	124.64	River Type 14	53.252911	-6.3692433			Q3-4	2	3		23/07/2010	2010																	Few
9	IE_EA_09D010100	DODDER_020	DODDER	RS09D010100	U/s Piperstown St	South Dublin County Council	124.64	River Type 14	53.252911	-6.3692433			Q4				22/08/2013	2013															Few		Few
9	IE_EA_09D010100	DODDER_020	DODDER	RS09D010100	U/s Piperstown St	South Dublin County Council	124.64	River Type 14	53.252911	-6.3692433	Riffle Glide Pool		Q4	2	1		08/09/2016	2016																					Few
9	IE_EA_09D010300	DODDER_030	DODDER	RS09D010300	Old Bawn Br	South Dublin County Council	89.61	River Type 24	53.275849	-6.3545286			Q4	2			11/05/2007	2007		Few												Few								Few
9	IE_EA_09D010300	DODDER_030	DODDER	RS09D010300	Old Bawn Br	South Dublin County Council	89.61	River Type 24	53.275849	-6.3545286			Q4	2	2		23/07/2010	2010														Few			Few
9	IE_EA_09D010300	DODDER_030	DODDER	RS09D010300	Old Bawn Br	South Dublin County Council	89.61	River Type 24	53.275849	-6.3545286			Q4				18/08/2013	2013		Few															Few					Few
9	IE_EA_09D010300	DODDER_030	DODDER	RS09D010300	Old Bawn Br	South Dublin County Council	89.61	River Type 24	53.275849	-6.3545286	Riffle Glide Pool		Q3-4	2	1		08/09/2016	2016														Few			Few				Few
9	IE_EA_09D010620	DODDER_040	DODDER	RS09D010620	Br on Springfield Ave	South Dublin County Council	43.74	River Type 33	53.2982033	-6.2959509			Q3-4	2			11/05/2007	2007										Few				Few			Few					Few
9	IE_EA_09D010620	DODDER_040	DODDER	RS09D010620	Br on Springfield Ave	South Dublin County Council	43.74	River Type 33	53.2982033	-6.2959509			Q3	2	1		06/07/2010	2010										Single											Few
9	IE_EA_09D010620	DODDER_040	DODDER	RS09D010620	Br on Springfield Ave	South Dublin County Council	43.74	River Type 33	53.2982033	-6.2959509			Q3-4				18/08/2013	2013		Few								Few							Few					Numerous
9	IE_EA_09D010620	DODDER_040	DODDER	RS09D010620	Br on Springfield Ave	South Dublin County Council	43.74	River Type 33	53.2982033	-6.2959509	Riffle Glide Pool		Q3	2	1		08/09/2016	2016																					Few
9	IE_EA_09D010900	DODDER_050	DODDER	RS09D010800	DODDER - Milltown Br (Dundrum Rd Br)	Dublin City Council	10.01	River Type 33	53.3102247	-6.2467117			Q3-4	2	1		26/07/2010	2010										Few				Few			Numerous				Few
9	IE_EA_09D010900	DODDER_050	DODDER	RS09D010900	Footbridge, Beaver Row	Dublin City Council	10.01	River Type 33	53.3182773	-6.2335472			Q3	2			14/05/2007	2007		Single				Few											Common					Single
9	IE_EA_09D010900	DODDER_050	DODDER	RS09D010900	Footbridge, Beaver Row	Dublin City Council	10.01	River Type 33	53.3182773	-6.2335472			Q4	2	1		26/07/2010	2010																	Numerous				Few
9	IE_EA_09D010900	DODDER_050	DODDER	RS09D010900	Footbridge, Beaver Row	Dublin City Council	10.01	River Type 33	53.3182773	-6.2335472			Q4				22/08/2013	2013		Few													Few		Common					Common
9	IE_EA_09D010900	DODDER_050	DODDER	RS09D010900	Footbridge, Beaver Row	Dublin City Council	10.01	River Type 33	53.3182773	-6.2335472	Riffle Glide Pool		Q3-4	2	1		09/09/2016	2016														Few			Few				Few
9	IE_EA_09D020200	DOUGLAS (LIFFEY)_010	DOUGLAS (LIFFEY)	RS09D020200	Granamore Br u/s King's R confl	Wicklow County Council	201.72	River Type 14	53.0696166	-6.5411474			Q4-5	2			18/04/2007	2007																	Few					Single
9	IE_EA_09D020200	DOUGLAS (LIFFEY)_010	DOUGLAS (LIFFEY)	RS09D020200	Granamore Br u/s King's R confl	Wicklow County Council	201.72	River Type 14	53.0696166	-6.5411474			Q4	2	1		09/07/2010	2010																	Few				Few
9	IE_EA_09D020200	DOUGLAS (LIFFEY)_010	DOUGLAS (LIFFEY)	RS09D020200	Granamore Br u/s King's R confl	Wicklow County Council	201.72	River Type 14	53.0696166	-6.5411474			Q4				16/08/2013	2013													Few		Few		Common					Few
9	IE_EA_09D020200	DOUGLAS (LIFFEY)_010	DOUGLAS (LIFFEY)	RS09D020200	Granamore Br u/s King's R confl	Wicklow County Council	201.72	River Type 14	53.0696166	-6.5411474	Riffle Glide Pool		Q4	2	1		30/08/2016	2016															Few		Few				Few
9	IE_EA_09D040500	DUNBOYNE STREAM_010	DUNBOYNE STREAM	RS09D040500	Rusk Br	Meath County Council	66.3	River Type 31	53.4159606	-6.470806			Q3	1			09/05/2007	2007							Few
9	IE_EA_09D040500	DUNBOYNE STREAM_010	DUNBOYNE STREAM	RS09D040500	Rusk Br	Meath County Council	66.3	River Type 31	53.4159606	-6.470806			Q3	2	1		22/07/2010	2010		Few												Few			Few				Common
9	IE_EA_09D040500	DUNBOYNE STREAM_010	DUNBOYNE STREAM	RS09D040500	Rusk Br	Meath County Council	66.3	River Type 31	53.4159606	-6.470806			Q3-4				21/08/2013	2013							Few										Common					Numerous
9	IE_EA_09D040500	DUNBOYNE STREAM_010	DUNBOYNE STREAM	RS09D040500	Rusk Br	Meath County Council	66.3	River Type 31	53.4159606	-6.470806	Riffle Glide Pool		Q3-4	2	1		23/06/2016	2016														Few							Excessive
9	IE_EA_09K010060	KING'S (LIFFEY)_010	GLASHABOY BROOK	RS09G020100	Glashaboy Br	Wicklow County Council	244.62	River Type 14	53.0553669	-6.410513			Q4	2			18/04/2007	2007																	Few
9	IE_EA_09K010060	KING'S (LIFFEY)_010	GLASHABOY BROOK	RS09G020100	Glashaboy Br	Wicklow County Council	244.62	River Type 14	53.0553669	-6.410513			Q3-4	2	1		08/07/2010	2010														Few			Few
9	IE_EA_09K010060	KING'S (LIFFEY)_010	GLASHABOY BROOK	RS09G020100	Glashaboy Br	Wicklow County Council	244.62	River Type 14	53.0553669	-6.410513			Q4				16/08/2013	2013										Few							Common
9	IE_EA_09K010060	KING'S (LIFFEY)_010	GLASHABOY BROOK	RS09G020100	Glashaboy Br	Wicklow County Council	244.62	River Type 14	53.0553669	-6.410513	Riffle Glide Pool		Q4	2	1		30/08/2016	2016														Few
9	IE_EA_09R020300	RATHMORE STREAM_010	HARTWELL STREAM	RS09H240950	Br at Rathmore (Hartwell Stream)	Kildare County Council	88.22	River Type 23	53.2208012	-6.5604037			Q3-4	2	1		07/07/2010	2010										Few											Common
9	IE_EA_09K010060	KING'S (LIFFEY)_010	KING'S (LIFFEY)	RS09K010060	Br 100m u/s Ballinagee R confl	Wicklow County Council	244.62	River Type 14	53.0589182	-6.4586572			Q4	2			18/04/2007	2007																	Few
9	IE_EA_09K010060	KING'S (LIFFEY)_010	KING'S (LIFFEY)	RS09K010060	Br 100m u/s Ballinagee R confl	Wicklow County Council	244.62	River Type 14	53.0589182	-6.4586572			Q4	2	2		08/07/2010	2010																	Common
9	IE_EA_09K010060	KING'S (LIFFEY)_010	KING'S (LIFFEY)	RS09K010060	Br 100m u/s Ballinagee R confl	Wicklow County Council	244.62	River Type 14	53.0589182	-6.4586572			Q4				16/08/2013	2013															Few		Few
9	IE_EA_09K010060	KING'S (LIFFEY)_010	KING'S (LIFFEY)	RS09K010060	Br 100m u/s Ballinagee R confl	Wicklow County Council	244.62	River Type 14	53.0589182	-6.4586572	Riffle Glide Pool		Q4	2	1		30/08/2016	2016
9	IE_EA_09K010100	KING'S (LIFFEY)_020	KING'S (LIFFEY)	RS09K010100	Br NW of Lockstown Upper	Wicklow County Council	198.7	River Type 13	53.072554	-6.5392227			Q4-5	2			18/04/2007	2007										Few				Few			Few
9	IE_EA_09K010100	KING'S (LIFFEY)_020	KING'S (LIFFEY)	RS09K010100	Br NW of Lockstown Upper	Wicklow County Council	198.7	River Type 13	53.072554	-6.5392227			Q4	2	2		08/07/2010	2010
9	IE_EA_09K010100	KING'S (LIFFEY)_020	KING'S (LIFFEY)	RS09K010100	Br NW of Lockstown Upper	Wicklow County Council	198.7	River Type 13	53.072554	-6.5392227			Q4				16/08/2013	2013										Few					Few		Common					Few
9	IE_EA_09K010100	KING'S (LIFFEY)_020	KING'S (LIFFEY)	RS09K010100	Br NW of Lockstown Upper	Wicklow County Council	198.7	River Type 13	53.072554	-6.5392227	Riffle Glide Pool		Q3-4	2	1		30/08/2016	2016														Few
9	IE_EA_09L010700	LIFFEY_060	KILCULLEN STREAM	RS09K020800	Br E of Yellowbog	Kildare County Council	99.98	River Type 12	53.1090469	-6.7416352			Q4	2			01/05/2007	2007		Few												Common								Few
9	IE_EA_09L010700	LIFFEY_060	KILCULLEN STREAM	RS09K020800	Br E of Yellowbog	Kildare County Council	99.98	River Type 12	53.1090469	-6.7416352			Q3-4	2	1		19/07/2010	2010														Few							Excessive
9	IE_EA_09L010700	LIFFEY_060	KILCULLEN STREAM	RS09K020800	Br E of Yellowbog	Kildare County Council	99.98	River Type 12	53.1090469	-6.7416352			Q3-4				15/08/2013	2013														Few	Few							Dominant
9	IE_EA_09L010700	LIFFEY_060	KILCULLEN STREAM	RS09K020800	Br E of Yellowbog	Kildare County Council	99.98	River Type 12	53.1090469	-6.7416352	Riffle Glide Pool		Q3-4	2	1		29/08/2016	2016														Few			Few				Few
9	IE_EA_09L010700	LIFFEY_060	KILCULLEN STREAM	RS09K021100	Br u/s Liffey River confl	Kildare County Council	99.98	River Type 12	53.1264513	-6.7351916			Q4	2	1		19/07/2010	2010										Few							Few				Common										Few
9	IE_EA_09L010700	LIFFEY_060	KILCULLEN STREAM	RS09K021100	Br u/s Liffey River confl	Kildare County Council	99.98	River Type 12	53.1264513	-6.7351916			Q3-4				15/08/2013	2013										Few					Few							Dominant									Few
9	IE_EA_09L010700	LIFFEY_060	KILCULLEN STREAM	RS09K021100	Br u/s Liffey River confl	Kildare County Council	99.98	River Type 12	53.1264513	-6.7351916	Lowland Meandering		Q3-4	2	1		29/08/2016	2016										Few							Few				Numerous
9	IE_EA_09L010100	LIFFEY_010	LIFFEY	RS09L010100	2km NW of Sally Gap	Wicklow County Council	349.82	River Type 14	53.1537877	-6.339988			Q4-5	2	2		19/04/2007	2007																Few
9	IE_EA_09L010100	LIFFEY_010	LIFFEY	RS09L010100	2km NW of Sally Gap	Wicklow County Council	349.82	River Type 14	53.1537877	-6.339988			Q4-5	1	5		09/07/2010	2010														Few
9	IE_EA_09L010100	LIFFEY_010	LIFFEY	RS09L010100	2km NW of Sally Gap	Wicklow County Council	349.82	River Type 14	53.1537877	-6.339988			Q4-5				19/08/2013	2013														Few			Few
9	IE_EA_09L010100	LIFFEY_010	LIFFEY	RS09L010100	2km NW of Sally Gap	Wicklow County Council	349.82	River Type 14	53.1537877	-6.339988	Riffle Glide Pool		Q4-5	2	1		25/08/2016	2016																	Common
9	IE_EA_09L010200	LIFFEY_020	LIFFEY	RS09L010200	Br E of Ballysmuttan	Wicklow County Council	216.93	River Type 14	53.1730447	-6.419703			Q4	2			19/04/2007	2007																	Numerous
9	IE_EA_09L010200	LIFFEY_020	LIFFEY	RS09L010200	Br E of Ballysmuttan	Wicklow County Council	216.93	River Type 14	53.1730447	-6.419703			Q3-4	2	3		09/07/2010	2010																	Few
9	IE_EA_09L010200	LIFFEY_020	LIFFEY	RS09L010200	Br E of Ballysmuttan	Wicklow County Council	216.93	River Type 14	53.1730447	-6.419703			Q4				19/08/2013	2013														Few			Few
9	IE_EA_09L010200	LIFFEY_020	LIFFEY	RS09L010200	Br E of Ballysmuttan	Wicklow County Council	216.93	River Type 14	53.1730447	-6.419703	Riffle Glide Pool		Q4	2	1		25/08/2016	2016														Few			Common
9	IE_EA_09L010250	LIFFEY_030	LIFFEY	RS09L010250	500 m d/s Ballyward Br	Wicklow County Council	185.04	River Type 13	53.1839759	-6.4694094			Q3-4	2			19/04/2007	2007														Common			Few
9	IE_EA_09L010250	LIFFEY_030	LIFFEY	RS09L010250	500 m d/s Ballyward Br	Wicklow County Council	185.04	River Type 13	53.1839759	-6.4694094			Q4-5	2	1		15/07/2010	2010																	Few				Few
9	IE_EA_09L010250	LIFFEY_030	LIFFEY	RS09L010250	500 m d/s Ballyward Br	Wicklow County Council	185.04	River Type 13	53.1839759	-6.4694094			Q4-5				13/08/2013	2013																	Few					Few
9	IE_EA_09L010250	LIFFEY_030	LIFFEY	RS09L010250	500 m d/s Ballyward Br	Wicklow County Council	185.04	River Type 13	53.1839759	-6.4694094	Riffle Glide Pool		Q4-5	2	1		26/08/2016	2016														Few
9	IE_EA_09L010400	LIFFEY_040	LIFFEY	RS09L010400	Ballymore Eustace Br	Wicklow County Council	118.45	River Type 13	53.1300231	-6.6154993			Q3-4	2			30/04/2007	2007		Few												Common								Single
9	IE_EA_09L010400	LIFFEY_040	LIFFEY	RS09L010400	Ballymore Eustace Br	Wicklow County Council	118.45	River Type 13	53.1300231	-6.6154993			Q3-4	2	1		15/07/2010	2010										Few											Few										Common
9	IE_EA_09L010400	LIFFEY_040	LIFFEY	RS09L010400	Ballymore Eustace Br	Wicklow County Council	118.45	River Type 13	53.1300231	-6.6154993			Q3-4				13/08/2013	2013																						Few									Few
9	IE_EA_09L010400	LIFFEY_040	LIFFEY	RS09L010400	Ballymore Eustace Br	Wicklow County Council	118.45	River Type 13	53.1300231	-6.6154993	Riffle Glide Pool		Q3-4	2	1		26/08/2016	2016																															Few
9	IE_EA_09L010600	LIFFEY_050	LIFFEY	RS09L010500	1km d/s Ballymore Br	Kildare County Council	106.26	River Type 12	53.1356112	-6.6229486			Q4	2			30/04/2007	2007		Few								Few				Few			Few
9	IE_EA_09L010600	LIFFEY_050	LIFFEY	RS09L010500	1km d/s Ballymore Br	Kildare County Council	106.26	River Type 12	53.1356112	-6.6229486			Q4	2	1		15/07/2010	2010		Few												Few			Few
9	IE_EA_09L010600	LIFFEY_050	LIFFEY	RS09L010500	1km d/s Ballymore Br	Kildare County Council	106.26	River Type 12	53.1356112	-6.6229486			Q3-4				16/08/2013	2013		Few														Few															Few
9	IE_EA_09L010600	LIFFEY_050	LIFFEY	RS09L010500	1km d/s Ballymore Br	Kildare County Council	106.26	River Type 12	53.1356112	-6.6229486	Riffle Glide Pool		Q3-4	2	1		26/08/2016	2016																	Few
9	IE_EA_09L010600	LIFFEY_050	LIFFEY	RS09L010600	New Br (La Touche)	Kildare County Council	106.26	River Type 12	53.1325064	-6.7006609			Q4	1			01/05/2007	2007																	Few														Few
9	IE_EA_09L010600	LIFFEY_050	LIFFEY	RS09L010600	New Br (La Touche)	Kildare County Council	106.26	River Type 12	53.1325064	-6.7006609			Q4	3			16/07/2010	2010																Few															Few
9	IE_EA_09L010600	LIFFEY_050	LIFFEY	RS09L010600	New Br (La Touche)	Kildare County Council	106.26	River Type 12	53.1325064	-6.7006609			Q4				16/08/2013	2013																	Few		Few												Common
9	IE_EA_09L010600	LIFFEY_050	LIFFEY	RS09L010600	New Br (La Touche)	Kildare County Council	106.26	River Type 12	53.1325064	-6.7006609	Riffle Glide Pool		Q4	2	1		29/08/2016	2016														Few	Few		Few				Few										Few
9	IE_EA_09L010700	LIFFEY_060	LIFFEY	RS09L010700	Kilcullen Br	Kildare County Council	99.98	River Type 12	53.1314937	-6.7429332			Q4	2			01/05/2007	2007																	Few														Few
9	IE_EA_09L010700	LIFFEY_060	LIFFEY	RS09L010700	Kilcullen Br	Kildare County Council	99.98	River Type 12	53.1314937	-6.7429332			Q4	2	1		16/07/2010	2010																	Few														Few
9	IE_EA_09L010700	LIFFEY_060	LIFFEY	RS09L010700	Kilcullen Br	Kildare County Council	99.98	River Type 12	53.1314937	-6.7429332			Q4				13/08/2013	2013															Few		Few					Common									Common
9	IE_EA_09L010700	LIFFEY_060	LIFFEY	RS09L010700	Kilcullen Br	Kildare County Council	99.98	River Type 12	53.1314937	-6.7429332	Riffle Glide Pool		Q4	2	1		29/08/2016	2016						Few								Few			Common				Numerous										Few
9	IE_EA_09L010850	LIFFEY_070	LIFFEY	RS09L010850	Connell Ford	Kildare County Council	90.23	River Type 31	53.1668027	-6.7827772			Q4	2			01/05/2007	2007										Few							Few														Few
9	IE_EA_09L010850	LIFFEY_070	LIFFEY	RS09L010850	Connell Ford	Kildare County Council	90.23	River Type 31	53.1668027	-6.7827772			Q4	2	1		19/07/2010	2010										Few							Few														Few
9	IE_EA_09L010850	LIFFEY_070	LIFFEY	RS09L010850	Connell Ford	Kildare County Council	90.23	River Type 31	53.1668027	-6.7827772			Q4				15/08/2013	2013		Few								Few							Few					Few									Common
9	IE_EA_09L010850	LIFFEY_070	LIFFEY	RS09L010850	Connell Ford	Kildare County Council	90.23	River Type 31	53.1668027	-6.7827772	Riffle Glide Pool		Q4	2	1		29/08/2016	2016										Few				Few	Few																Common
9	IE_EA_09L011000	LIFFEY_080	LIFFEY	RS09L011000	2.5 km d/s Newbridge	Kildare County Council	79.18	River Type 31	53.2040075	-6.774778			Q4	2			01/05/2007	2007										Few				Few																	Few
9	IE_EA_09L011000	LIFFEY_080	LIFFEY	RS09L011000	2.5 km d/s Newbridge	Kildare County Council	79.18	River Type 31	53.2040075	-6.774778			Q4	2			19/07/2010	2010										Few				Numerous							Few
9	IE_EA_09L011000	LIFFEY_080	LIFFEY	RS09L011000	2.5 km d/s Newbridge	Kildare County Council	79.18	River Type 31	53.2040075	-6.774778			Q4				15/08/2013	2013		Few								Few					Few							Numerous									Few
9	IE_EA_09L011000	LIFFEY_080	LIFFEY	RS09L011000	2.5 km d/s Newbridge	Kildare County Council	79.18	River Type 31	53.2040075	-6.774778	Riffle Glide Pool		Q4	2	1		29/08/2016	2016															Few						Few
9	IE_EA_09L011050	LIFFEY_090	LIFFEY	RS09L011050	Victoria Br	Kildare County Council	74.24	River Type 31	53.219012	-6.739676			Q4	2			01/05/2007	2007										Few							Few														Few
9	IE_EA_09L011050	LIFFEY_090	LIFFEY	RS09L011050	Victoria Br	Kildare County Council	74.24	River Type 31	53.219012	-6.739676			Q4	2	1		19/07/2010	2010														Few							Few										Few
9	IE_EA_09L011200	LIFFEY_100	LIFFEY	RS09L011200	Castlekeely Ford (RHS)	Kildare County Council	69.58	River Type 31	53.2380324	-6.6977088			Q3-4	2			02/05/2007	2007																	Common
9	IE_EA_09L011200	LIFFEY_100	LIFFEY	RS09L011200	Castlekeely Ford (RHS)	Kildare County Council	69.58	River Type 31	53.2380324	-6.6977088			Q3-4	3			19/07/2010	2010														Common
9	IE_EA_09L011200	LIFFEY_100	LIFFEY	RS09L011200	Castlekeely Ford (RHS)	Kildare County Council	69.58	River Type 31	53.2380324	-6.6977088			Q3-4				15/08/2013	2013										Few									Few												Common
9	IE_EA_09L011200	LIFFEY_100	LIFFEY	RS09L011200	Castlekeely Ford (RHS)	Kildare County Council	69.58	River Type 31	53.2380324	-6.6977088	Lowland Meandering		Q3-4			4	01/09/2016	2016														Few							Few
9	IE_EA_09L011500	LIFFEY_120	LIFFEY	RS09L011500	Alexandra Br Clane (d/s side)	Kildare County Council	64.51	River Type 31	53.2864279	-6.6807772			Q3-4	2			02/05/2007	2007		Few												Few			Few
9	IE_EA_09L011500	LIFFEY_120	LIFFEY	RS09L011500	Alexandra Br Clane (d/s side)	Kildare County Council	64.51	River Type 31	53.2864279	-6.6807772			Q4	2	1		20/07/2010	2010		Few															Few														Few
9	IE_EA_09L011500	LIFFEY_120	LIFFEY	RS09L011500	Alexandra Br Clane (d/s side)	Kildare County Council	64.51	River Type 31	53.2864279	-6.6807772			Q4				14/08/2013	2013		Few								Few							Few		Few												Few
9	IE_EA_09L011500	LIFFEY_120	LIFFEY	RS09L011500	Alexandra Br Clane (d/s side)	Kildare County Council	64.51	River Type 31	53.2864279	-6.6807772	Riffle Glide Pool		Q4	2	1		01/09/2016	2016														Few			Common		Few												Common
9	IE_EA_09L011600	LIFFEY_130	LIFFEY	RS09L011600	Straffan Turnings Lr (RHS & Mid)	Kildare County Council	59.66	River Type 31	53.3048834	-6.6129916			Q3-4	3			17/04/2007	2007							Few							Few			Few
9	IE_EA_09L011600	LIFFEY_130	LIFFEY	RS09L011600	Straffan Turnings Lr (RHS & Mid)	Kildare County Council	59.66	River Type 31	53.3048834	-6.6129916			Q4	2.5			20/07/2010	2010										Few
9	IE_EA_09L011600	LIFFEY_130	LIFFEY	RS09L011600	Straffan Turnings Lr (RHS & Mid)	Kildare County Council	59.66	River Type 31	53.3048834	-6.6129916			Q4				14/08/2013	2013										Few				Few			Few		Few			Few									Common
9	IE_EA_09L011600	LIFFEY_130	LIFFEY	RS09L011600	Straffan Turnings Lr (RHS & Mid)	Kildare County Council	59.66	River Type 31	53.3048834	-6.6129916	Riffle Glide Pool		Q4	2	1		01/09/2016	2016										Few							Few		Few												Single
9	IE_EA_09L011700	LIFFEY_140	LIFFEY	RS09L011700	Br in Celbridge	Kildare County Council	49.97	River Type 31	53.3370629	-6.5382548			Q3-4	2			02/05/2007	2007		Few																				Few
9	IE_EA_09L011700	LIFFEY_140	LIFFEY	RS09L011700	Br in Celbridge	Kildare County Council	49.97	River Type 31	53.3370629	-6.5382548			Q4	2			20/07/2010	2010		Few															Few				Few
9	IE_EA_09L011700	LIFFEY_140	LIFFEY	RS09L011700	Br in Celbridge	Kildare County Council	49.97	River Type 31	53.3370629	-6.5382548			Q4				20/08/2013	2013		Few								Few					Few		Few					Dominant
9	IE_EA_09L011700	LIFFEY_140	LIFFEY	RS09L011700	Br in Celbridge	Kildare County Council	49.97	River Type 31	53.3370629	-6.5382548	Riffle Glide Pool		Q4	2	1		01/09/2016	2016										Few							Few				Numerous
9	IE_EA_09L011900	LIFFEY_150	LIFFEY	RS09L011900	Leixlip Br (RHS)	Kildare County Council	27.12	River Type 32	53.3628491	-6.4852848			Q3	2			02/05/2007	2007																						Single
9	IE_EA_09L011900	LIFFEY_150	LIFFEY	RS09L011900	Leixlip Br (RHS)	Kildare County Council	27.12	River Type 32	53.3628491	-6.4852848			Q3	2	1		20/07/2010	2010																														Few
9	IE_EA_09L011900	LIFFEY_150	LIFFEY	RS09L011900	Leixlip Br (RHS)	Kildare County Council	27.12	River Type 32	53.3628491	-6.4852848			Q3				20/08/2013	2013															Few		Few					Common									Few
9	IE_EA_09L011900	LIFFEY_150	LIFFEY	RS09L011900	Leixlip Br (RHS)	Kildare County Council	27.12	River Type 32	53.3628491	-6.4852848	Riffle Glide Pool		Q4	2	1		02/09/2016	2016															Few						Common										Few
9	IE_EA_09L012100	LIFFEY_170	LIFFEY	RS09L012100	Lucan Br	South Dublin County Council	19.75	River Type 32	53.3599642	-6.4461957			Q3-4	2			02/05/2007	2007																	Common
9	IE_EA_09L012100	LIFFEY_170	LIFFEY	RS09L012100	Lucan Br	South Dublin County Council	19.75	River Type 32	53.3599642	-6.4461957			Q3-4	2			20/07/2010	2010		Few												Few			Few
9	IE_EA_09L012100	LIFFEY_170	LIFFEY	RS09L012100	Lucan Br	South Dublin County Council	19.75	River Type 32	53.3599642	-6.4461957			Q3-4				13/08/2013	2013										Few							Few					Few
9	IE_EA_09L012100	LIFFEY_170	LIFFEY	RS09L012100	Lucan Br	South Dublin County Council	19.75	River Type 32	53.3599642	-6.4461957	Riffle Glide Pool		Q4	2	1		02/09/2016	2016										Few				Few			Few				Common
9	IE_EA_09L012360	LIFFEY_190	LIFFEY	RS09L012360	LIFFEY - 0.2 km d/s Chapelizon Br (Lynch's Lane)	Dublin City Council	6.5	River Type 33	53.34618	-6.3427016			Q3-4				02/05/2007	2007		Few															Common
9	IE_EA_09L012360	LIFFEY_190	LIFFEY	RS09L012360	LIFFEY - 0.2 km d/s Chapelizon Br (Lynch's Lane)	Dublin City Council	6.5	River Type 33	53.34618	-6.3427016			Q3-4	3			20/07/2010	2010														Few			Few
9	IE_EA_09L012360	LIFFEY_190	LIFFEY	RS09L012360	LIFFEY - 0.2 km d/s Chapelizon Br (Lynch's Lane)	Dublin City Council	6.5	River Type 33	53.34618	-6.3427016			Q3-4				18/08/2013	2013														Few					Common
9	IE_EA_09L012360	LIFFEY_190	LIFFEY	RS09L012360	LIFFEY - 0.2 km d/s Chapelizon Br (Lynch's Lane)	Dublin City Council	6.5	River Type 33	53.34618	-6.3427016	Lowland Meandering		Q3-4	2	1		07/09/2016	2016						Few								Few			Few		Few
9	IE_EA_09L020035	LYREEN_010	LYREEN	RS09L020035	Br NE of Treadstown	Kildare County Council	60.03	River Type 31	53.3775141	-6.6244747			Q3-4	1			03/05/2007	2007														Few			Few
9	IE_EA_09L020035	LYREEN_010	LYREEN	RS09L020035	Br NE of Treadstown	Kildare County Council	60.03	River Type 31	53.3775141	-6.6244747			Q3	1.5	1		21/07/2010	2010																	Few				Few
9	IE_EA_09L020035	LYREEN_010	LYREEN	RS09L020035	Br NE of Treadstown	Kildare County Council	60.03	River Type 31	53.3775141	-6.6244747			Q3				20/08/2013	2013									Few					Few			Few					Few
9	IE_EA_09L020035	LYREEN_010	LYREEN	RS09L020035	Br NE of Treadstown	Kildare County Council	60.03	River Type 31	53.3775141	-6.6244747	Riffle Glide Pool		Q3	2	1		29/06/2016	2016														Few			Common
9	IE_EA_09L020100	LYREEN_020	LYREEN	RS09L020100	Just u/s Rye Water confl	Kildare County Council	48.29	River Type 31	53.3901213	-6.5821844			Q3	2			03/05/2007	2007																	Dominant
9	IE_EA_09L020100	LYREEN_020	LYREEN	RS09L020100	Just u/s Rye Water confl	Kildare County Council	48.29	River Type 31	53.3901213	-6.5821844			Q3	2	1		21/07/2010	2010		Few												Few			Common
9	IE_EA_09L020100	LYREEN_020	LYREEN	RS09L020100	Just u/s Rye Water confl	Kildare County Council	48.29	River Type 31	53.3901213	-6.5821844			Q3				20/08/2013	2013										Few					Common		Few					Numerous									Few
9	IE_EA_09L020100	LYREEN_020	LYREEN	RS09L020100	Just u/s Rye Water confl	Kildare County Council	48.29	River Type 31	53.3901213	-6.5821844	Riffle Glide Pool		Q3	2	1		07/09/2016	2016														Few							Dominant										Few
9	IE_EA_09L030100	LEMONSTOWN STREAM_010	LEMONSTOWN STREAM	RS09L030100	Br E of Athgrean	Wicklow County Council	174.3	River Type 14	53.0735326	-6.607323			Q4-5	2			30/04/2007	2007										Few												Few
9	IE_EA_09L030100	LEMONSTOWN STREAM_010	LEMONSTOWN STREAM	RS09L030100	Br E of Athgrean	Wicklow County Council	174.3	River Type 14	53.0735326	-6.607323			Q5	2	1		16/07/2010	2010																					Few
9	IE_EA_09L030100	LEMONSTOWN STREAM_010	LEMONSTOWN STREAM	RS09L030100	Br E of Athgrean	Wicklow County Council	174.3	River Type 14	53.0735326	-6.607323			Q4-5				16/08/2013	2013																	Few					Common
9	IE_EA_09L030100	LEMONSTOWN STREAM_010	LEMONSTOWN STREAM	RS09L030100	Br E of Athgrean	Wicklow County Council	174.3	River Type 14	53.0735326	-6.607323	Riffle Glide Pool		Q4	2	1		30/08/2016	2016																					Few
9	IE_EA_09L030600	LEMONSTOWN STREAM_020	LEMONSTOWN STREAM	RS09L030600	Br N of Ballybought	Wicklow County Council	135.45	River Type 12	53.1168139	-6.6334233			Q4-5	2			01/05/2007	2007										Few																					Few
9	IE_EA_09L030600	LEMONSTOWN STREAM_020	LEMONSTOWN STREAM	RS09L030600	Br N of Ballybought	Wicklow County Council	135.45	River Type 12	53.1168139	-6.6334233			Q4	2			16/07/2010	2010										Few											Few
9	IE_EA_09L030600	LEMONSTOWN STREAM_020	LEMONSTOWN STREAM	RS09L030600	Br N of Ballybought	Wicklow County Council	135.45	River Type 12	53.1168139	-6.6334233			Q4				16/08/2013	2013										Few												Dominant									Common
9	IE_EA_09L030600	LEMONSTOWN STREAM_020	LEMONSTOWN STREAM	RS09L030600	Br N of Ballybought	Wicklow County Council	135.45	River Type 12	53.1168139	-6.6334233	Riffle Glide Pool		Q4	2	1		01/09/2016	2016										Few				Few			Few				Common										Few
9	IE_EA_09M010060	MORELL_010	MORELL	RS09M010060	South Br W of Tipper Ho	Kildare County Council	106.34	River Type 13	53.2126793	-6.6258565			Q3-4	2	1		07/07/2010	2010		Single																			Excessive
9	IE_EA_09M010060	MORELL_010	MORELL	RS09M010060	South Br W of Tipper Ho	Kildare County Council	106.34	River Type 13	53.2126793	-6.6258565			Q3-4				14/08/2013	2013														Few								Excessive
9	IE_EA_09M010060	MORELL_010	MORELL	RS09M010060	South Br W of Tipper Ho	Kildare County Council	106.34	River Type 13	53.2126793	-6.6258565	Riffle Glide Pool		Q3-4	2	1		27/06/2016	2016														Few							Excessive
9	IE_EA_09M010060	MORELL_010	MORELL	RS09M010060	South Br W of Tipper Ho	Kildare County Council	106.34	River Type 13	53.2126793	-6.6258565	Riffle Glide Pool	No	Q4	2	1		27/06/2018	2018																					Numerous
9	IE_EA_09M010100	MORELL_020	MORELL	RS09M010100	Bridge in Johnstown	Kildare County Council	85.23	River Type 22	53.2368306	-6.6234149			Q3-4	2			17/04/2007	2007		Few															Dominant					Numerous
9	IE_EA_09M010100	MORELL_020	MORELL	RS09M010100	Bridge in Johnstown	Kildare County Council	85.23	River Type 22	53.2368306	-6.6234149			Q3	2	1		07/07/2010	2010																	Few				Numerous
9	IE_EA_09M010100	MORELL_020	MORELL	RS09M010100	Bridge in Johnstown	Kildare County Council	85.23	River Type 22	53.2368306	-6.6234149			Q3				14/08/2013	2013																						Excessive
9	IE_EA_09M010100	MORELL_020	MORELL	RS09M010100	Bridge in Johnstown	Kildare County Council	85.23	River Type 22	53.2368306	-6.6234149	Riffle Glide Pool		Q3	2	1		27/06/2016	2016														Few							Dominant
9	IE_EA_09M010100	MORELL_020	MORELL	RS09M010100	Bridge in Johnstown	Kildare County Council	85.23	River Type 22	53.2368306	-6.6234149	Riffle Glide Pool	No	Q3	2	1		27/06/2018	2018										Single							Single				Common
9	IE_EA_09M010150	MORELL_030	MORELL	RS09M010150	Br N.E. of Sherlockstown	Kildare County Council	71.4	River Type 32	53.2658129	-6.6273206			Q3-4	2			17/04/2007	2007		Few																				Few
9	IE_EA_09M010150	MORELL_030	MORELL	RS09M010150	Br N.E. of Sherlockstown	Kildare County Council	71.4	River Type 32	53.2658129	-6.6273206			Q3-4	2	1		07/07/2010	2010					Few					Few											Common
9	IE_EA_09M010150	MORELL_030	MORELL	RS09M010150	Br N.E. of Sherlockstown	Kildare County Council	71.4	River Type 32	53.2658129	-6.6273206			Q3-4				15/08/2013	2013																	Few					Dominant
9	IE_EA_09M010150	MORELL_030	MORELL	RS09M010150	Br N.E. of Sherlockstown	Kildare County Council	71.4	River Type 32	53.2658129	-6.6273206	Riffle Glide Pool		Q3	2	1		27/06/2016	2016		Few													Few		Few				Dominant
9	IE_EA_09M010150	MORELL_030	MORELL	RS09M010150	Br N.E. of Sherlockstown	Kildare County Council	71.4	River Type 32	53.2658129	-6.6273206	Riffle Glide Pool	No	Q3	2	1		27/06/2018	2018															Few						Numerous
9	IE_EA_09M010300	MORELL_040	MORELL	RS09M010300	Br u/s Liffey R confl	Kildare County Council	59.87	River Type 32	53.301854	-6.6098342			Q4-5	2			17/04/2007	2007														Few			Common					Few									Single
9	IE_EA_09M010300	MORELL_040	MORELL	RS09M010300	Br u/s Liffey R confl	Kildare County Council	59.87	River Type 32	53.301854	-6.6098342			Q4	2			08/07/2010	2010																	Common				Common
9	IE_EA_09M010300	MORELL_040	MORELL	RS09M010300	Br u/s Liffey R confl	Kildare County Council	59.87	River Type 32	53.301854	-6.6098342			Q4				14/08/2013	2013																	Few					Dominant									Few
9	IE_EA_09M010300	MORELL_040	MORELL	RS09M010300	Br u/s Liffey R confl	Kildare County Council	59.87	River Type 32	53.301854	-6.6098342	Riffle Glide Pool		Q3-4	2	1		27/06/2016	2016														Few			Few				Numerous										Single
9	IE_EA_09M030500	MAYNE_010	MAYNE	RS09M030500	Hole-in-the-Wall Rd Br	Fingal County Council	9.99	River Type 32	53.4089034	-6.1626201			Q3	2			10/05/2007	2007										Few				Common
9	IE_EA_09M030500	MAYNE_010	MAYNE	RS09M030500	Hole-in-the-Wall Rd Br	Fingal County Council	9.99	River Type 32	53.4089034	-6.1626201			Q3	2	1		27/07/2010	2010		Few								Single							Few
9	IE_EA_09M030500	MAYNE_010	MAYNE	RS09M030500	Hole-in-the-Wall Rd Br	Fingal County Council	9.99	River Type 32	53.4089034	-6.1626201			Q2-3				21/08/2013	2013		Few					Few			Few				Few
9	IE_EA_09M030500	MAYNE_010	MAYNE	RS09M030500	Hole-in-the-Wall Rd Br	Fingal County Council	9.99	River Type 32	53.4089034	-6.1626201	Riffle Glide Pool		Q2-3	2	1		22/07/2016	2016																	Common				Numerous
9	IE_EA_09O011700	OWENADOHER_010	OWENADOHER	RS09O011100	Br SW of Delamaine Cottage	South Dublin County Council	40.47	River Type 24	53.2547325	-6.3004975			Q4-5	2			14/05/2007	2007										Few							Few					Few
9	IE_EA_09O011700	OWENADOHER_010	OWENADOHER	RS09O011100	Br SW of Delamaine Cottage	South Dublin County Council	40.47	River Type 24	53.2547325	-6.3004975			Q4	2	1		06/07/2010	2010															Few						Few
9	IE_EA_09O011700	OWENADOHER_010	OWENADOHER	RS09O011100	Br SW of Delamaine Cottage	South Dublin County Council	40.47	River Type 24	53.2547325	-6.3004975			Q4				22/08/2013	2013										Few							Few					Common
9	IE_EA_09O011700	OWENADOHER_010	OWENADOHER	RS09O011100	Br SW of Delamaine Cottage	South Dublin County Council	40.47	River Type 24	53.2547325	-6.3004975	Riffle Glide Pool		Q4	2	1		09/09/2016	2016										Few							Few				Few
9	IE_EA_09O011700	OWENADOHER_010	OWENADOHER	RS09O011300	Scholarstown Road Br	South Dublin County Council	40.47	River Type 24	53.280886	-6.2977261			Q3	2			25/09/2007	2007										Few				Common								Few
9	IE_EA_09O011700	OWENADOHER_010	OWENADOHER	RS09O011300	Scholarstown Road Br	South Dublin County Council	40.47	River Type 24	53.280886	-6.2977261			Q4	2	1		06/07/2010	2010															Few						Few
9	IE_EA_09O011700	OWENADOHER_010	OWENADOHER	RS09O011700	Br u/s Dodder R confl	South Dublin County Council	40.47	River Type 24	53.2988014	-6.2877461			Q3-4	2			14/05/2007	2007														Few			Few					Single
9	IE_EA_09O011700	OWENADOHER_010	OWENADOHER	RS09O011700	Br u/s Dodder R confl	South Dublin County Council	40.47	River Type 24	53.2988014	-6.2877461			Q3-4	2	1		06/07/2010	2010										Few				Few			Few				Few
9	IE_EA_09O011700	OWENADOHER_010	OWENADOHER	RS09O011700	Br u/s Dodder R confl	South Dublin County Council	40.47	River Type 24	53.2988014	-6.2877461			Q3-4				18/08/2013	2013										Few												Common
9	IE_EA_09O011700	OWENADOHER_010	OWENADOHER	RS09O011700	Br u/s Dodder R confl	South Dublin County Council	40.47	River Type 24	53.2988014	-6.2877461	Riffle Glide Pool		Q4	2	1		09/09/2016	2016														Few	Few		Few				Numerous
9	IE_EA_09P010400	PAINESTOWN_010	PAINESTOWN	RS09P010300	Bridge in Kill Village	Kildare County Council	80.82	River Type 12	53.248883	-6.5900056			Q3	2	1		07/07/2010	2010		Few													Few						Few										Single
9	IE_EA_09P010400	PAINESTOWN_010	PAINESTOWN	RS09P010300	Bridge in Kill Village	Kildare County Council	80.82	River Type 12	53.248883	-6.5900056			Q3-4				14/08/2013	2013																						Dominant
9	IE_EA_09P010400	PAINESTOWN_010	PAINESTOWN	RS09P010300	Bridge in Kill Village	Kildare County Council	80.82	River Type 12	53.248883	-6.5900056	Riffle Glide Pool		Q3-4	2	1		28/06/2016	2016		Few												Few	Few						Common										Single
9	IE_EA_09P010400	PAINESTOWN_010	PAINESTOWN	RS09P010400	Painestown Br	Kildare County Council	80.82	River Type 12	53.2610018	-6.5910499			Q3-4	3			17/04/2007	2007										Few
9	IE_EA_09P010400	PAINESTOWN_010	PAINESTOWN	RS09P010400	Painestown Br	Kildare County Council	80.82	River Type 12	53.2610018	-6.5910499			Q3	2	1		07/07/2010	2010														Few			Few
9	IE_EA_09P010400	PAINESTOWN_010	PAINESTOWN	RS09P010400	Painestown Br	Kildare County Council	80.82	River Type 12	53.2610018	-6.5910499			Q3-4				15/08/2013	2013										Few												Numerous									Common
9	IE_EA_09P010400	PAINESTOWN_010	PAINESTOWN	RS09P010400	Painestown Br	Kildare County Council	80.82	River Type 12	53.2610018	-6.5910499	Riffle Glide Pool		Q3	2	1		27/06/2016	2016																	Common				Numerous										Few
9	IE_EA_09P030800	Poddle_010	PODDLE	RS09P030400	The Priory, Kimmage Road	Dublin City Council	2.73	River Type 32	53.3084791	-6.3097581			Q3				25/09/2007	2007		Few					Few			Few				Few			Few					Few
9	IE_EA_09P210700	Powerstown (Dublin)_010	POWERSTOWN 09	RS09P210700	Br SE of Powerstown House	Fingal County Council	62.46	River Type 32	53.421798	-6.4091955			Q3-4	2			09/05/2007	2007		Few															Few					Few
9	IE_EA_09P210700	Powerstown (Dublin)_010	POWERSTOWN 09	RS09P210700	Br SE of Powerstown House	Fingal County Council	62.46	River Type 32	53.421798	-6.4091955			Q2-3	1	1		22/07/2010	2010		Few								Few							Few
9	IE_EA_09P210700	Powerstown (Dublin)_010	POWERSTOWN 09	RS09P210700	Br SE of Powerstown House	Fingal County Council	62.46	River Type 32	53.421798	-6.4091955			Q2-3				21/08/2013	2013										Few				Few			Few
9	IE_EA_09P210700	Powerstown (Dublin)_010	POWERSTOWN 09	RS09P210700	Br SE of Powerstown House	Fingal County Council	62.46	River Type 32	53.421798	-6.4091955	Riffle Glide Pool		Q2-3	2	1		22/07/2016	2016										Few				Few			Numerous
9	IE_EA_09R010100	RYE WATER_010	RYE WATER	RS09R010100	Balfeaghan Br	Meath County Council	68.71	River Type 32	53.4083339	-6.6754731			Q4	2			03/05/2007	2007		Few								Few				Few			Few
9	IE_EA_09R010100	RYE WATER_010	RYE WATER	RS09R010100	Balfeaghan Br	Meath County Council	68.71	River Type 32	53.4083339	-6.6754731			Q3-4	2			21/07/2010	2010																	Few				Numerous
9	IE_EA_09R010100	RYE WATER_010	RYE WATER	RS09R010100	Balfeaghan Br	Meath County Council	68.71	River Type 32	53.4083339	-6.6754731			Q3-4				20/08/2013	2013																						Excessive
9	IE_EA_09R010100	RYE WATER_010	RYE WATER	RS09R010100	Balfeaghan Br	Meath County Council	68.71	River Type 32	53.4083339	-6.6754731	Riffle Glide Pool		Q3-4	2	1		24/06/2016	2016							Few							Few			Few				Few
9	IE_EA_09R010300	RYE WATER_020	RYE WATER	RS09R010300	Anne's Br	Meath County Council	53.46	River Type 32	53.397194	-6.6013399			Q3-4	1			03/05/2007	2007		Few								Few							Common					Few
9	IE_EA_09R010300	RYE WATER_020	RYE WATER	RS09R010300	Anne's Br	Meath County Council	53.46	River Type 32	53.397194	-6.6013399			Q3-4	2			21/07/2010	2010																					Common										Few
9	IE_EA_09R010300	RYE WATER_020	RYE WATER	RS09R010300	Anne's Br	Meath County Council	53.46	River Type 32	53.397194	-6.6013399			Q3				20/08/2013	2013															Few							Few									Common
9	IE_EA_09R010300	RYE WATER_020	RYE WATER	RS09R010300	Anne's Br	Meath County Council	53.46	River Type 32	53.397194	-6.6013399	Riffle Glide Pool		Q3-4	2	1		24/06/2016	2016																	Few				Few										Few
9	IE_EA_09R010400	RYE WATER_030	RYE WATER	RS09R010400	Kildare Br	Meath County Council	47.18	River Type 32	53.388946	-6.5767636			Q3-4	1	2		03/05/2007	2007		Few												Few			Common
9	IE_EA_09R010400	RYE WATER_030	RYE WATER	RS09R010400	Kildare Br	Meath County Council	47.18	River Type 32	53.388946	-6.5767636			Q3	1	1		21/07/2010	2010		Few								Few											Excessive
9	IE_EA_09R010400	RYE WATER_030	RYE WATER	RS09R010400	Kildare Br	Meath County Council	47.18	River Type 32	53.388946	-6.5767636			Q3				13/08/2013	2013														Few								Dominant									Few
9	IE_EA_09R010400	RYE WATER_030	RYE WATER	RS09R010400	Kildare Br	Meath County Council	47.18	River Type 32	53.388946	-6.5767636	Riffle Glide Pool		Q3-4	2	1		24/06/2016	2016														Few			Few				Excessive
9	IE_EA_09R010600	RYE WATER_040	RYE WATER	RS09R010600	Br in Leixlip	Kildare County Council	28.06	River Type 31	53.3632065	-6.4910078			Q3	2			09/05/2007	2007																	Few					Single
9	IE_EA_09R010600	RYE WATER_040	RYE WATER	RS09R010600	Br in Leixlip	Kildare County Council	28.06	River Type 31	53.3632065	-6.4910078			Q3	2			22/07/2010	2010																	Few				Common										Few
9	IE_EA_09R010600	RYE WATER_040	RYE WATER	RS09R010600	Br in Leixlip	Kildare County Council	28.06	River Type 31	53.3632065	-6.4910078			Q3				20/08/2013	2013															Few		Common					Numerous									Few
9	IE_EA_09R010600	RYE WATER_040	RYE WATER	RS09R010600	Br in Leixlip	Kildare County Council	28.06	River Type 31	53.3632065	-6.4910078	Lowland Meandering		Q3	2	0.5		24/06/2016	2016														Few			Common
9	IE_EA_09R020300	RATHMORE STREAM_010	RATHMORE STREAM	RS09R020100	Br at Rathmore	Kildare County Council	88.22	River Type 23	53.2165483	-6.5607012			Q3				15/08/2013	2013										Few					Few							Numerous
9	IE_EA_09R020300	RATHMORE STREAM_010	RATHMORE STREAM	RS09R020100	Br at Rathmore	Kildare County Council	88.22	River Type 23	53.2165483	-6.5607012	Riffle Glide Pool		Q3	2	1		28/06/2016	2016																					Excessive
9	IE_EA_09R020300	RATHMORE STREAM_010	RATHMORE STREAM	RS09R020200	Bridge S.W. of Arthurstown	Kildare County Council	88.22	River Type 23	53.2302755	-6.5778173			Q4	2			17/04/2007	2007										Few												Few									Single
9	IE_EA_09R020300	RATHMORE STREAM_010	RATHMORE STREAM	RS09R020200	Bridge S.W. of Arthurstown	Kildare County Council	88.22	River Type 23	53.2302755	-6.5778173			Q4	2	1		07/07/2010	2010														Few	Few		Few				Numerous
9	IE_EA_09R020300	RATHMORE STREAM_010	RATHMORE STREAM	RS09R020200	Bridge S.W. of Arthurstown	Kildare County Council	88.22	River Type 23	53.2302755	-6.5778173			Q4				14/08/2013	2013		Few								Few												Dominant									Common
9	IE_EA_09R020300	RATHMORE STREAM_010	RATHMORE STREAM	RS09R020200	Bridge S.W. of Arthurstown	Kildare County Council	88.22	River Type 23	53.2302755	-6.5778173	Riffle Glide Pool		Q4				28/06/2016	2016										Few				Common			Few				Numerous
9	IE_EA_09R020300	RATHMORE STREAM_010	RATHMORE STREAM	RS09R020300	Bridge N.E. of Johnstown	Kildare County Council	88.22	River Type 23	53.2394887	-6.6136759			Q3-4	2	1		07/07/2010	2010															Few		Few				Numerous
9	IE_EA_09R020300	RATHMORE STREAM_010	RATHMORE STREAM	RS09R020300	Bridge N.E. of Johnstown	Kildare County Council	88.22	River Type 23	53.2394887	-6.6136759			Q3-4				14/08/2013	2013										Few												Dominant
9	IE_EA_09R020300	RATHMORE STREAM_010	RATHMORE STREAM	RS09R020300	Bridge N.E. of Johnstown	Kildare County Council	88.22	River Type 23	53.2394887	-6.6136759	Riffle Glide Pool		Q3	2	1		28/06/2016	2016																	Few				Numerous
9	IE_EA_09S010300	SANTRY_010	SANTRY	RS09S010300	Clonshaugh Rd Br	Fingal County Council	37.49	River Type 32	53.3970121	-6.2143506			Q2-3	2			10/05/2007	2007		Few																				Few
9	IE_EA_09S010300	SANTRY_010	SANTRY	RS09S010300	Clonshaugh Rd Br	Fingal County Council	37.49	River Type 32	53.3970121	-6.2143506			Q3	2	1		22/07/2010	2010		Few					Few							Few			Numerous
9	IE_EA_09S010300	SANTRY_010	SANTRY	RS09S010300	Clonshaugh Rd Br	Fingal County Council	37.49	River Type 32	53.3970121	-6.2143506			Q3				21/08/2013	2013							Common			Few				Few	Few		Few
9	IE_EA_09S010300	SANTRY_010	SANTRY	RS09S010300	Clonshaugh Rd Br	Fingal County Council	37.49	River Type 32	53.3970121	-6.2143506	Lowland Meandering		Q3	2	1		24/08/2016	2016		Single												Few	Few
9	IE_EA_09T010300	TOLKA_010	TOLKA	RS09T010300	Br at Black Bull	Meath County Council	74.63	River Type 31	53.4508004	-6.4837093			Q3-4	2			09/05/2007	2007		Few															Few					Few
9	IE_EA_09T010300	TOLKA_010	TOLKA	RS09T010300	Br at Black Bull	Meath County Council	74.63	River Type 31	53.4508004	-6.4837093			Q3	2	1		22/07/2010	2010							Few										Few				Numerous
9	IE_EA_09T010300	TOLKA_010	TOLKA	RS09T010300	Br at Black Bull	Meath County Council	74.63	River Type 31	53.4508004	-6.4837093			Q3				21/08/2013	2013							Common										Common					Dominant
9	IE_EA_09T010300	TOLKA_010	TOLKA	RS09T010300	Br at Black Bull	Meath County Council	74.63	River Type 31	53.4508004	-6.4837093	Riffle Glide Pool		Q3-4	2	1		23/06/2016	2016																	Numerous				Numerous
9	IE_EA_09T010600	TOLKA_020	TOLKA	RS09T010600	Dunboyne Rd Br u/s Clonee	Meath County Council	63.59	River Type 31	53.4149316	-6.4536022			Q3-4	2			09/05/2007	2007		Few								Few							Few					Few
9	IE_EA_09T010600	TOLKA_020	TOLKA	RS09T010600	Dunboyne Rd Br u/s Clonee	Meath County Council	63.59	River Type 31	53.4149316	-6.4536022			Q3	2	1		26/07/2010	2010		Few				Few											Numerous				Excessive
9	IE_EA_09T010600	TOLKA_020	TOLKA	RS09T010600	Dunboyne Rd Br u/s Clonee	Meath County Council	63.59	River Type 31	53.4149316	-6.4536022			Q3				21/08/2013	2013							Few			Few							Few					Dominant
9	IE_EA_09T010600	TOLKA_020	TOLKA	RS09T010600	Dunboyne Rd Br u/s Clonee	Meath County Council	63.59	River Type 31	53.4149316	-6.4536022	Riffle Glide Pool		Q3	2	1		23/06/2016	2016							Few										Numerous				Common
9	IE_EA_09T010800	TOLKA_030	TOLKA	RS09T010800	Mulhuddart Br	Fingal County Council	52.27	River Type 31	53.4028623	-6.3955898			Q2-3	1			09/05/2007	2007		Few					Few										Few					Common
9	IE_EA_09T010800	TOLKA_030	TOLKA	RS09T010800	Mulhuddart Br	Fingal County Council	52.27	River Type 31	53.4028623	-6.3955898			Q2-3	2			26/07/2010	2010		Few					Few							Common			Dominant
9	IE_EA_09T010800	TOLKA_030	TOLKA	RS09T010800	Mulhuddart Br	Fingal County Council	52.27	River Type 31	53.4028623	-6.3955898	Lowland Meandering		Q2	2			09/09/2015	2015							Few							Common			Few
9	IE_EA_09T010800	TOLKA_030	TOLKA	RS09T010800	Mulhuddart Br	Fingal County Council	52.27	River Type 31	53.4028623	-6.3955898	Lowland Meandering		Q2	2	0.5		23/06/2016	2016		Few					Few							Few
9	IE_EA_09T010800	TOLKA_030	TOLKA	RS09T010800	Mulhuddart Br	Fingal County Council	52.27	River Type 31	53.4028623	-6.3955898	Lowland Meandering	No	Q2-3	2	0.5		05/07/2017	2017		Few					Few							Few			Few
9	IE_EA_09T010800	TOLKA_030	TOLKA	RS09T010800	Mulhuddart Br	Fingal County Council	52.27	River Type 31	53.4028623	-6.3955898	Lowland Straight	No	Q2-3	4	1		16/08/2018	2018		Few					Few										Few
9	IE_EA_09T011000	TOLKA_040	TOLKA	RS09T011000	Abbotstown Br	Fingal County Council	36.89	River Type 32	53.3843431	-6.3583493			Q2	1			09/05/2007	2007		Few
9	IE_EA_09T011000	TOLKA_040	TOLKA	RS09T011000	Abbotstown Br	Fingal County Council	36.89	River Type 32	53.3843431	-6.3583493			Q2-3	2			28/10/2008	2008		Single					Common		Single	Few				Numerous
9	IE_EA_09T011000	TOLKA_040	TOLKA	RS09T011000	Abbotstown Br	Fingal County Council	36.89	River Type 32	53.3843431	-6.3583493			Q3				21/08/2013	2013		Few					Few								Few							Common
9	IE_EA_09T011000	TOLKA_040	TOLKA	RS09T011000	Abbotstown Br	Fingal County Council	36.89	River Type 32	53.3843431	-6.3583493	Riffle Glide Pool		Q3	2	1		23/06/2016	2016		Common					Few							Numerous			Few
9	IE_EA_09T011100	TOLKA_050	TOLKA	RS09T011100	Violet Hill Drive Finglas	Fingal County Council	17.26	River Type 32	53.3747554	-6.281977			Q3	2			10/05/2007	2007																	Common
9	IE_EA_09T011100	TOLKA_050	TOLKA	RS09T011100	Violet Hill Drive Finglas	Fingal County Council	17.26	River Type 32	53.3747554	-6.281977			Q3	2			22/07/2010	2010		Few															Numerous				Few
9	IE_EA_09T011100	TOLKA_050	TOLKA	RS09T011100	Violet Hill Drive Finglas	Fingal County Council	17.26	River Type 32	53.3747554	-6.281977			Q3				21/08/2013	2013		Few					Few		Few	Few					Few		Few					Dominant
9	IE_EA_09T011100	TOLKA_050	TOLKA	RS09T011100	Violet Hill Drive Finglas	Fingal County Council	17.26	River Type 32	53.3747554	-6.281977	Riffle Glide Pool		Q3				23/06/2016	2016		Few					Few							Few			Few					Few
10	IE_EA_10A020200	AUGHRIM (WICKLOW)_010	AUGHRIM (WICKLOW)	RS10A020100	AUGHRIM (WICKLOW) - Br in Aughrim	Wicklow County Council	43.45	River Type 12	52.8548976	-6.3290185	Riffle Glide Pool		Q3-4	3	6		15/07/2015	2015									Few	Few				Common	Few		Common				Few
10	IE_EA_10A020200	AUGHRIM (WICKLOW)_010	AUGHRIM (WICKLOW)	RS10A020100	AUGHRIM (WICKLOW) - Br in Aughrim	Wicklow County Council	43.45	River Type 12	52.8548976	-6.3290185	Riffle Glide Pool	No	Q4	2	1		27/06/2018	2018										Few					Few		Few				Few
10	IE_EA_10A020200	AUGHRIM (WICKLOW)_010	AUGHRIM (WICKLOW)	RS10A020200	Coat's Br	Wicklow County Council	43.45	River Type 12	52.8491643	-6.2951898			Q4	3			06/08/2009	2009														Common	Few		Common					Few
10	IE_EA_10A020200	AUGHRIM (WICKLOW)_010	AUGHRIM (WICKLOW)	RS10A020200	Coat's Br	Wicklow County Council	43.45	River Type 12	52.8491643	-6.2951898			Q4	3	1		09/10/2012	2012									Single					Numerous			Few					Single
10	IE_EA_10A020200	AUGHRIM (WICKLOW)_010	AUGHRIM (WICKLOW)	RS10A020200	Coat's Br	Wicklow County Council	43.45	River Type 12	52.8491643	-6.2951898	Riffle Glide Pool		Q4	4.5	4		15/07/2015	2015										Few				Common			Few				Few
10	IE_EA_10A020200	AUGHRIM (WICKLOW)_010	AUGHRIM (WICKLOW)	RS10A020200	Coat's Br	Wicklow County Council	43.45	River Type 12	52.8491643	-6.2951898	Intermediate	No	Q3-4	3			28/06/2018	2018														Few			Few
10	IE_EA_10A020400	AUGHRIM (WICKLOW)_020	AUGHRIM (WICKLOW)	RS10A020400	Wooden Br	Wicklow County Council	11.11	River Type 13	52.8311245	-6.2335013			Q4	3			06/08/2009	2009														Common			Common				Few
10	IE_EA_10A020400	AUGHRIM (WICKLOW)_020	AUGHRIM (WICKLOW)	RS10A020400	Wooden Br	Wicklow County Council	11.11	River Type 13	52.8311245	-6.2335013			Q3-4	4	4		09/10/2012	2012														Common								Single
10	IE_EA_10A020400	AUGHRIM (WICKLOW)_020	AUGHRIM (WICKLOW)	RS10A020400	Wooden Br	Wicklow County Council	11.11	River Type 13	52.8311245	-6.2335013	Riffle Glide Pool		Q3-4	2	4		14/07/2015	2015		Few							Few					Few
10	IE_EA_10A020400	AUGHRIM (WICKLOW)_020	AUGHRIM (WICKLOW)	RS10A020400	Wooden Br	Wicklow County Council	11.11	River Type 13	52.8311245	-6.2335013	Riffle Glide Pool	No	Q3-4	2.5	2		28/06/2018	2018														Few	Few						Few
10	IE_EA_10A030700	AVOCA_010	AVOCA	RS10A030700	Avoca Br	Wicklow County Council	22	River Type 13	52.8567287	-6.2127982			Q1	2	1		25/10/2007	2007																	Few
10	IE_EA_10A030700	AVOCA_010	AVOCA	RS10A030700	Avoca Br	Wicklow County Council	22	River Type 13	52.8567287	-6.2127982	Riffle Glide Pool		Q2	2			03/10/2008	2008														Few			Single
10	IE_EA_10A030700	AVOCA_010	AVOCA	RS10A030700	Avoca Br	Wicklow County Council	22	River Type 13	52.8567287	-6.2127982			Q4	2	1		19/09/2010	2010		Few												Few			Few
10	IE_EA_10A030700	AVOCA_010	AVOCA	RS10A030700	Avoca Br	Wicklow County Council	22	River Type 13	52.8567287	-6.2127982			Q3	2	3		09/09/2011	2011														Single
10	IE_EA_10A030700	AVOCA_010	AVOCA	RS10A030700	Avoca Br	Wicklow County Council	22	River Type 13	52.8567287	-6.2127982			Q3	2	2		09/10/2012	2012														Few			Few
10	IE_EA_10A030700	AVOCA_010	AVOCA	RS10A030700	Avoca Br	Wicklow County Council	22	River Type 13	52.8567287	-6.2127982	Riffle Glide Pool		Q3	1.5	2		29/07/2015	2015														Few			Few
10	IE_EA_10A030700	AVOCA_010	AVOCA	RS10A030700	Avoca Br	Wicklow County Council	22	River Type 13	52.8567287	-6.2127982	Riffle Glide Pool	No	Q2	2.5			18/06/2018	2018
10	IE_EA_10A040100	AVONBEG_010	AVONBEG	RS10A040100	Ford nr Barravore	Wicklow County Council	158.69	River Type 14	52.9876039	-6.4125063			Q4-5	3			16/10/2009	2009																	Few
10	IE_EA_10A040100	AVONBEG_010	AVONBEG	RS10A040100	Ford nr Barravore	Wicklow County Council	158.69	River Type 14	52.9876039	-6.4125063			Q4	5	5		24/10/2012	2012
10	IE_EA_10A040100	AVONBEG_010	AVONBEG	RS10A040100	Ford nr Barravore	Wicklow County Council	158.69	River Type 14	52.9876039	-6.4125063	Riffle Glide Pool		Q4	5	7		28/07/2015	2015										Few				Few			Few
10	IE_EA_10A040100	AVONBEG_010	AVONBEG	RS10A040100	Ford nr Barravore	Wicklow County Council	158.69	River Type 14	52.9876039	-6.4125063	Riffle Glide Pool	No	Q4-5	2	1		20/06/2018	2018																	Few
10	IE_EA_10A040400	AVONBEG_020	AVONBEG	RS10A040400	Drumgoff Br	Wicklow County Council	121.25	River Type 14	52.9562878	-6.3552833			Q4	2			24/06/2009	2009																	Common
10	IE_EA_10A040400	AVONBEG_020	AVONBEG	RS10A040400	Drumgoff Br	Wicklow County Council	121.25	River Type 14	52.9562878	-6.3552833			Q4-5	2	1		24/10/2012	2012																	Few
10	IE_EA_10A040400	AVONBEG_020	AVONBEG	RS10A040400	Drumgoff Br	Wicklow County Council	121.25	River Type 14	52.9562878	-6.3552833	Riffle Glide Pool		Q4	4	4		28/07/2015	2015														Few			Few
10	IE_EA_10A040400	AVONBEG_020	AVONBEG	RS10A040400	Drumgoff Br	Wicklow County Council	121.25	River Type 14	52.9562878	-6.3552833		No	Q4	3.5	1.5		20/06/2018	2018										Few				Few			Few
10	IE_EA_10A040600	AVONBEG_030	AVONBEG	RS10A040600	Greenan Br	Wicklow County Council	87.01	River Type 13	52.9244521	-6.295147			Q3-4				24/06/2009	2009
10	IE_EA_10A040600	AVONBEG_030	AVONBEG	RS10A040600	Greenan Br	Wicklow County Council	87.01	River Type 13	52.9244521	-6.295147			Q3-4	3	2		09/10/2012	2012														Few
10	IE_EA_10A040600	AVONBEG_030	AVONBEG	RS10A040600	Greenan Br	Wicklow County Council	87.01	River Type 13	52.9244521	-6.295147	Riffle Glide Pool		Q3-4	3	4		29/07/2015	2015														Few			Few
10	IE_EA_10A040600	AVONBEG_030	AVONBEG	RS10A040600	Greenan Br	Wicklow County Council	87.01	River Type 13	52.9244521	-6.295147	Riffle Glide Pool	No	Q3-4	2	1		20/06/2018	2018																	Few
10	IE_EA_10A040800	AVONBEG_040	AVONBEG	RS10A040800	Meetings Br	Wicklow County Council	31.44	River Type 13	52.8850963	-6.2334444			Q3-4	3	1		24/06/2009	2009																	Few
10	IE_EA_10A040800	AVONBEG_040	AVONBEG	RS10A040800	Meetings Br	Wicklow County Council	31.44	River Type 13	52.8850963	-6.2334444			Q4	2	2		09/10/2012	2012														Few			Few					Few
10	IE_EA_10A040800	AVONBEG_040	AVONBEG	RS10A040800	Meetings Br	Wicklow County Council	31.44	River Type 13	52.8850963	-6.2334444	Riffle Glide Pool		Q4	4	6		29/07/2015	2015														Few			Few				Few
10	IE_EA_10A040800	AVONBEG_040	AVONBEG	RS10A040800	Meetings Br	Wicklow County Council	31.44	River Type 13	52.8850963	-6.2334444	Riffle Glide Pool	No	Q4			1	18/06/2018	2018		Single															Few
10	IE_EA_10A050010	AVONMORE_010	AVONMORE	RS10A050010	Br d/s Lough Tay	Wicklow County Council	216.98	River Type 13	53.0935413	-6.266795			Q4-5	3			14/07/2009	2009										Few				Few	Few
10	IE_EA_10A050010	AVONMORE_010	AVONMORE	RS10A050010	Br d/s Lough Tay	Wicklow County Council	216.98	River Type 13	53.0935413	-6.266795			Q4-5	3	2		23/10/2012	2012																	Few
10	IE_EA_10A050010	AVONMORE_010	AVONMORE	RS10A050010	Br d/s Lough Tay	Wicklow County Council	216.98	River Type 13	53.0935413	-6.266795	Riffle Glide Pool		Q4	3	3		09/07/2015	2015														Few	Few		Few
10	IE_EA_10A050010	AVONMORE_010	AVONMORE	RS10A050010	Br d/s Lough Tay	Wicklow County Council	216.98	River Type 13	53.0935413	-6.266795	Riffle Glide Pool	No	Q4	2.5	2		13/06/2018	2018		Single												Few			Few
10	IE_EA_10A050020	AVONMORE_020	AVONMORE	RS10A050020	AVONMORE - Old Br	Wicklow County Council	201.93	River Type 14	53.0547885	-6.2700877			Q4-5	3	1		18/06/2009	2009										Few				Few			Few
10	IE_EA_10A050020	AVONMORE_020	AVONMORE	RS10A050020	AVONMORE - Old Br	Wicklow County Council	201.93	River Type 14	53.0547885	-6.2700877			Q4-5	3			23/10/2012	2012																	Few
10	IE_EA_10A050020	AVONMORE_020	AVONMORE	RS10A050020	AVONMORE - Old Br	Wicklow County Council	201.93	River Type 14	53.0547885	-6.2700877	Riffle Glide Pool		Q4	5	5		09/07/2015	2015		Few				Single											Few
10	IE_EA_10A050020	AVONMORE_020	AVONMORE	RS10A050020	AVONMORE - Old Br	Wicklow County Council	201.93	River Type 14	53.0547885	-6.2700877	Riffle Glide Pool	No	Q4	1.5	2		13/06/2018	2018																	Few
10	IE_EA_10A050050	AVONMORE_030	AVONMORE	RS10A050050	Br in Annamoe	Wicklow County Council	165.66	River Type 14	53.0309055	-6.2516617			Q4	2			18/06/2009	2009		Few												Few			Few
10	IE_EA_10A050050	AVONMORE_030	AVONMORE	RS10A050050	Br in Annamoe	Wicklow County Council	165.66	River Type 14	53.0309055	-6.2516617			Q4-5	3	3		23/10/2012	2012
10	IE_EA_10A050050	AVONMORE_030	AVONMORE	RS10A050050	Br in Annamoe	Wicklow County Council	165.66	River Type 14	53.0309055	-6.2516617	Riffle Glide Pool		Q4	2	4		09/07/2015	2015		Few												Few			Few
10	IE_EA_10A050050	AVONMORE_030	AVONMORE	RS10A050050	Br in Annamoe	Wicklow County Council	165.66	River Type 14	53.0309055	-6.2516617	Riffle Glide Pool	No	Q4	2.5	2		14/06/2018	2018		Few								Few							Few
10	IE_EA_10A050100	AVONMORE_040	AVONMORE	RS10A050100	Br SE of Bookey's Br	Wicklow County Council	118.45	River Type 13	52.999327	-6.2956953			Q4	4			18/06/2009	2009		Few								Few				Few	Few		Common
10	IE_EA_10A050100	AVONMORE_040	AVONMORE	RS10A050100	Br SE of Bookey's Br	Wicklow County Council	118.45	River Type 13	52.999327	-6.2956953			Q4-5	3	1		12/10/2012	2012																	Few
10	IE_EA_10A050100	AVONMORE_040	AVONMORE	RS10A050100	Br SE of Bookey's Br	Wicklow County Council	118.45	River Type 13	52.999327	-6.2956953	Riffle Glide Pool		Q4	4	4		30/07/2015	2015														Few			Few
10	IE_EA_10A050100	AVONMORE_040	AVONMORE	RS10A050100	Br SE of Bookey's Br	Wicklow County Council	118.45	River Type 13	52.999327	-6.2956953	Riffle Glide Pool		Q4-5	3.5	4		12/06/2018	2018		Few															Few
10	IE_EA_10A050200	AVONMORE_050	AVONMORE	RS10A050200	Clara Br	Wicklow County Council	95.76	River Type 14	52.966903	-6.2596994			Q4-5	2			18/06/2009	2009														Few	Few		Few
10	IE_EA_10A050200	AVONMORE_050	AVONMORE	RS10A050200	Clara Br	Wicklow County Council	95.76	River Type 14	52.966903	-6.2596994			Q4-5	4	4		24/10/2012	2012														Few			Few
10	IE_EA_10A050200	AVONMORE_050	AVONMORE	RS10A050200	Clara Br	Wicklow County Council	95.76	River Type 14	52.966903	-6.2596994	Riffle Glide Pool		Q4	4	5		30/07/2015	2015										Few				Few	Few		Few
10	IE_EA_10A050200	AVONMORE_050	AVONMORE	RS10A050200	Clara Br	Wicklow County Council	95.76	River Type 14	52.966903	-6.2596994	Riffle Glide Pool	No	Q4-5	2	3		14/06/2018	2018										Few							Few
10	IE_EA_10A050300	AVONMORE_060	AVONMORE	RS10A050300	AVONMORE - Rathdrum Br	Wicklow County Council	76.38	River Type 13	52.9365885	-6.2271449			Q4-5	2	3		24/10/2012	2012										Few				Few					Single
10	IE_EA_10A050300	AVONMORE_060	AVONMORE	RS10A050300	AVONMORE - Rathdrum Br	Wicklow County Council	76.38	River Type 13	52.9365885	-6.2271449	Riffle Glide Pool		Q4-5	5	5		30/07/2015	2015		Few								Few				Few			Few
10	IE_EA_10A050300	AVONMORE_060	AVONMORE	RS10A050300	AVONMORE - Rathdrum Br	Wicklow County Council	76.38	River Type 13	52.9365885	-6.2271449	Riffle Glide Pool	No	Q4-5	2	2.5		18/06/2018	2018										Few				Few	Few		Few
10	IE_EA_10A050300	AVONMORE_060	AVONMORE	RS10A050310	Rathdrum Br (RHS)	Wicklow County Council	76.38	River Type 13	52.9359363	-6.2264316			Q4	2			24/06/2009	2009										Common				Common			Common
10	IE_EA_10A050500	AVONMORE_070	AVONMORE	RS10A050500	Lion's Br	Wicklow County Council	40.3	River Type 13	52.8873774	-6.2287629			Q4	3			24/06/2009	2009										Few				Common	Few
10	IE_EA_10A050500	AVONMORE_070	AVONMORE	RS10A050500	Lion's Br	Wicklow County Council	40.3	River Type 13	52.8873774	-6.2287629			Q4	3	2		09/10/2012	2012		Few												Few
10	IE_EA_10A050500	AVONMORE_070	AVONMORE	RS10A050500	Lion's Br	Wicklow County Council	40.3	River Type 13	52.8873774	-6.2287629	Riffle Glide Pool		Q4	4	4		29/07/2015	2015		Few								Few				Few			Few
10	IE_EA_10A050500	AVONMORE_070	AVONMORE	RS10A050500	Lion's Br	Wicklow County Council	40.3	River Type 13	52.8873774	-6.2287629	Riffle Glide Pool	No	Q3-4	3.5	2.5		18/06/2018	2018														Few	Few		Few
10	IE_EA_10A060400	ASKANAGAP STREAM_010	ASKANAGAP STREAM	RS10A060400	Br u/s Derry R confl	Wicklow County Council	102.6	River Type 14	52.8313198	-6.4312332			Q4-5	2	0.5		25/06/2009	2009														Few								Few
10	IE_EA_10A060400	ASKANAGAP STREAM_010	ASKANAGAP STREAM	RS10A060400	Br u/s Derry R confl	Wicklow County Council	102.6	River Type 14	52.8313198	-6.4312332			Q4-5	3	2		05/07/2012	2012																						Few
10	IE_EA_10A060400	ASKANAGAP STREAM_010	ASKANAGAP STREAM	RS10A060400	Br u/s Derry R confl	Wicklow County Council	102.6	River Type 14	52.8313198	-6.4312332	Riffle Glide Pool		Q4-5	3	3		08/07/2015	2015														Few			Few				Single
10	IE_EA_10A060400	ASKANAGAP STREAM_010	ASKANAGAP STREAM	RS10A060400	Br u/s Derry R confl	Wicklow County Council	102.6	River Type 14	52.8313198	-6.4312332	Riffle Glide Pool	No	Q4-5	3.5	1.5		11/07/2018	2018														Few			Few				Few
10	IE_EA_10B010200	BALLYDUFF STREAM (WICKLOW)_010	BALLYDUFF STREAM (WICKLOW)	RS10B010200	Ballyduff Br	Wicklow County Council	19.43	River Type 13	52.7949986	-6.1880494			Q3-4	2			14/10/2009	2009		Single												Few								Numerous
10	IE_EA_10B010200	BALLYDUFF STREAM (WICKLOW)_010	BALLYDUFF STREAM (WICKLOW)	RS10B010200	Ballyduff Br	Wicklow County Council	19.43	River Type 13	52.7949986	-6.1880494			Q3	2	1		24/05/2012	2012														Few	Single							Numerous
10	IE_EA_10B010200	BALLYDUFF STREAM (WICKLOW)_010	BALLYDUFF STREAM (WICKLOW)	RS10B010200	Ballyduff Br	Wicklow County Council	19.43	River Type 13	52.7949986	-6.1880494	Riffle Glide Pool		Q3	2	3		14/07/2015	2015		Few																			Numerous
10	IE_EA_10B010200	BALLYDUFF STREAM (WICKLOW)_010	BALLYDUFF STREAM (WICKLOW)	RS10B010200	Ballyduff Br	Wicklow County Council	19.43	River Type 13	52.7949986	-6.1880494	Riffle Glide Pool	No	Q3	2	1		12/07/2018	2018								Few						Few							Dominant
10	IE_EA_10B020400	BALLYCREEN BROOK_010	BALLYCREEN BROOK	RS10B020400	BALLYCREEN BROOK - Br W of Macreddin	Wicklow County Council	134.86	River Type 14	52.883374	-6.3363218			Q4	3			06/08/2009	2009															Few		Few					Few
10	IE_EA_10B020400	BALLYCREEN BROOK_010	BALLYCREEN BROOK	RS10B020400	BALLYCREEN BROOK - Br W of Macreddin	Wicklow County Council	134.86	River Type 14	52.883374	-6.3363218			Q4	2	2		04/07/2012	2012																					Few
10	IE_EA_10B020400	BALLYCREEN BROOK_010	BALLYCREEN BROOK	RS10B020400	BALLYCREEN BROOK - Br W of Macreddin	Wicklow County Council	134.86	River Type 14	52.883374	-6.3363218	Riffle Glide Pool		Q4-5	2	2		28/07/2015	2015														Few			Few				Few
10	IE_EA_10B020400	BALLYCREEN BROOK_010	BALLYCREEN BROOK	RS10B020400	BALLYCREEN BROOK - Br W of Macreddin	Wicklow County Council	134.86	River Type 14	52.883374	-6.3363218	Riffle Glide Pool	No	Q4	3	1.5		27/06/2018	2018														Few			Few				Few
10	IE_EA_10B020700	BALLYCREEN BROOK_020	BALLYCREEN BROOK	RS10B020700	Tinnakilly Br	Wicklow County Council	71.51	River Type 14	52.8568857	-6.3174126			Q3-4	3			06/08/2009	2009										Single				Common
10	IE_EA_10B020700	BALLYCREEN BROOK_020	BALLYCREEN BROOK	RS10B020700	Tinnakilly Br	Wicklow County Council	71.51	River Type 14	52.8568857	-6.3174126			Q4-5	3	2		04/07/2012	2012														Few
10	IE_EA_10B020700	BALLYCREEN BROOK_020	BALLYCREEN BROOK	RS10B020700	Tinnakilly Br	Wicklow County Council	71.51	River Type 14	52.8568857	-6.3174126	Riffle Glide Pool		Q4-5	3	2		07/07/2015	2015																	Few
10	IE_EA_10B020700	BALLYCREEN BROOK_020	BALLYCREEN BROOK	RS10B020700	Tinnakilly Br	Wicklow County Council	71.51	River Type 14	52.8568857	-6.3174126	Riffle Glide Pool	No	Q4-5	2	2		27/06/2018	2018																	Few
10	IE_EA_10B080500	Ballyronan Stream_010	Ballyronan Stream	RS10B080600	Just u/s Br in golf club	Wicklow County Council	20.11	River Type 12	53.09511	-6.0631685	Riffle Glide Pool	No	Q3-4	1.5	1		22/09/2015	2015		Single								Few				Few	Few
10	IE_EA_10B980500	BALLYMACAHARA_010	BALLYMACAHARA	RS10B980500	Killiskey Trib u/s Vartry	Wicklow County Council	21.34	River Type 13	53.0151228	-6.1047836			Q4	2	2		30/05/2012	2012		Few								Few					Few							Numerous
10	IE_EA_10C010100	CLOGHOGE BROOK_010	CLOGHOGE BROOK	RS10C010100	Br u/s Annamoe R confl	Wicklow County Council	219.04	River Type 14	53.0921757	-6.2696657			Q4-5	3			14/07/2009	2009																	Few
10	IE_EA_10C010100	CLOGHOGE BROOK_010	CLOGHOGE BROOK	RS10C010100	Br u/s Annamoe R confl	Wicklow County Council	219.04	River Type 14	53.0921757	-6.2696657			Q4-5	3	2		23/10/2012	2012																	Few
10	IE_EA_10C010100	CLOGHOGE BROOK_010	CLOGHOGE BROOK	RS10C010100	Br u/s Annamoe R confl	Wicklow County Council	219.04	River Type 14	53.0921757	-6.2696657	Cascade Step Pool (CSP)		Q4-5	4.5	4		09/07/2015	2015														Few			Few
10	IE_EA_10C010100	CLOGHOGE BROOK_010	CLOGHOGE BROOK	RS10C010100	Br u/s Annamoe R confl	Wicklow County Council	219.04	River Type 14	53.0921757	-6.2696657	Riffle Glide Pool	No	Q4-5	2.5	2.5		13/06/2018	2018														Few			Few
10	IE_EA_10C020500	COOLALUG STREAM_010	COOLALUG STREAM	RS10C020280	Toberpatrick Br	Wicklow County Council	82.16	River Type 13	52.7930887	-6.3986261			Q4-5	2	1		05/07/2012	2012										Few							Few					Numerous
10	IE_EA_10C020500	COOLALUG STREAM_010	COOLALUG STREAM	RS10C020280	Toberpatrick Br	Wicklow County Council	82.16	River Type 13	52.7930887	-6.3986261	Lowland Meandering		Q4	4.5	4		15/07/2015	2015																	Common				Common
10	IE_EA_10C020500	COOLALUG STREAM_010	COOLALUG STREAM	RS10C020280	Toberpatrick Br	Wicklow County Council	82.16	River Type 13	52.7930887	-6.3986261	Intermediate	No	Q4	3	1		11/07/2018	2018									Few					Few			Common				Common
10	IE_EA_10C020500	COOLALUG STREAM_010	COOLALUG STREAM	RS10C020500	Br d/s Killaveny Br	Wicklow County Council	82.16	River Type 13	52.815069	-6.4055565			Q4	2			25/06/2009	2009									Single	Few							Few					Common
10	IE_EA_10C020500	COOLALUG STREAM_010	COOLALUG STREAM	RS10C020500	Br d/s Killaveny Br	Wicklow County Council	82.16	River Type 13	52.815069	-6.4055565			Q4	2			05/07/2012	2012										Few				Few			Few					Common
10	IE_EA_10C020500	COOLALUG STREAM_010	COOLALUG STREAM	RS10C020500	Br d/s Killaveny Br	Wicklow County Council	82.16	River Type 13	52.815069	-6.4055565	Lowland Meandering		Q3-4	1.5	1		15/07/2015	2015									Few					Few			Dominant				Few
10	IE_EA_10C020500	COOLALUG STREAM_010	COOLALUG STREAM	RS10C020500	Br d/s Killaveny Br	Wicklow County Council	82.16	River Type 13	52.815069	-6.4055565	Intermediate	No	Q4	2	1		12/07/2018	2018						Single								Few			Numerous				Numerous
10	IE_EA_10C040350	CARRICKMINES STREAM_010	CARRICKMINES STREAM	RS10C040350	u/s Overpass	Dun Laoghaire Rathdown County Council	18.38	River Type 13	53.246913	-6.1377122			Q3-4	2			16/06/2009	2009		Few												Few			Few
10	IE_EA_10C040350	CARRICKMINES STREAM_010	CARRICKMINES STREAM	RS10C040350	u/s Overpass	Dun Laoghaire Rathdown County Council	18.38	River Type 13	53.246913	-6.1377122			Q3-4	2			11/06/2012	2012		Few								Few				Few	Few
10	IE_EA_10C040350	CARRICKMINES STREAM_010	CARRICKMINES STREAM	RS10C040350	u/s Overpass	Dun Laoghaire Rathdown County Council	18.38	River Type 13	53.246913	-6.1377122	Riffle Glide Pool		Q3-4	2	1		10/06/2015	2015														Few	Few		Few
10	IE_EA_10C040350	CARRICKMINES STREAM_010	CARRICKMINES STREAM	RS10C040350	u/s Overpass	Dun Laoghaire Rathdown County Council	18.38	River Type 13	53.246913	-6.1377122	Riffle Glide Pool	No	Q3-4	2	1		19/06/2018	2018														Few	Few		Few				Few
10	IE_EA_10D010010	DARGLE_010	DARGLE	RS10D010010	Br u/s Tinnehinch Br	Wicklow County Council	88.27	River Type 14	53.1696207	-6.1987819			Q4-5	3			15/10/2009	2009																						Few
10	IE_EA_10D010010	DARGLE_010	DARGLE	RS10D010010	Br u/s Tinnehinch Br	Wicklow County Council	88.27	River Type 14	53.1696207	-6.1987819			Q4	3	3		19/06/2012	2012
10	IE_EA_10D010010	DARGLE_010	DARGLE	RS10D010010	Br u/s Tinnehinch Br	Wicklow County Council	88.27	River Type 14	53.1696207	-6.1987819	Riffle Glide Pool		Q4-5	3	2		11/06/2015	2015																	Few					Single
10	IE_EA_10D010010	DARGLE_010	DARGLE	RS10D010010	Br u/s Tinnehinch Br	Wicklow County Council	88.27	River Type 14	53.1696207	-6.1987819	Riffle Glide Pool	No	Q4-5	2	1		10/07/2018	2018																	Few				Few
10	IE_EA_10D010100	DARGLE_020	DARGLE	RS10D010100	Br u/s Glencullen R	Wicklow County Council	20.97	River Type 13	53.1895966	-6.1394948			Q4	3			07/07/2009	2009		Single										Few		Few	Few							Few
10	IE_EA_10D010100	DARGLE_020	DARGLE	RS10D010100	Br u/s Glencullen R	Wicklow County Council	20.97	River Type 13	53.1895966	-6.1394948			Q4	2	2		14/06/2012	2012		Few								Few				Few
10	IE_EA_10D010100	DARGLE_020	DARGLE	RS10D010100	Br u/s Glencullen R	Wicklow County Council	20.97	River Type 13	53.1895966	-6.1394948	Riffle Glide Pool	No	Q4	2	2		11/06/2015	2015		Single															Few
10	IE_EA_10D010100	DARGLE_020	DARGLE	RS10D010100	Br u/s Glencullen R	Wicklow County Council	20.97	River Type 13	53.1895966	-6.1394948	Riffle Glide Pool	No	Q4	2	1		10/07/2018	2018		Few											Few	Few							Few
10	IE_EA_10D010250	DARGLE_030	DARGLE	RS10D010250	1km u/s Bray Br	Wicklow County Council	5.06	River Type 13	53.2005613	-6.1278129			Q3-4	2			07/07/2009	2009		Few										Few			Few		Few					Few
10	IE_EA_10D010250	DARGLE_030	DARGLE	RS10D010250	1km u/s Bray Br	Wicklow County Council	5.06	River Type 13	53.2005613	-6.1278129	Riffle Glide Pool		Q3	2	4		02/07/2015	2015		Few												Few							Few
10	IE_EA_10D010250	DARGLE_030	DARGLE	RS10D010250	1km u/s Bray Br	Wicklow County Council	5.06	River Type 13	53.2005613	-6.1278129		No	Q3-4	2	1		26/07/2018	2018															Few		Few				Few
10	IE_EA_10D010250	DARGLE_030	DARGLE	RS10D010260	Peoples park u/s Swan rv conflu	Wicklow County Council	5.06	River Type 13	53.2024392	-6.118622			Q4	3	1		14/06/2012	2012														Few	Few							Few
10	IE_EA_10D010300	DARGLE_040	DARGLE	RS10D010270	Peoples Park d/s Swan Rv Confluence	Dun Laoghaire Rathdown County Council	3.94	River Type 13	53.2027834	-6.1175632	Riffle Glide Pool		Q4	3	4		02/07/2015	2015										Few			Few	Few			Few				Common
10	IE_EA_10D020300	DERRY WATER_010	DERRY WATER	RS10D020300	Br NW of Moyne	Wicklow County Council	157.37	River Type 13	52.8632069	-6.4684212			Q4-5	2			25/06/2009	2009										Few					Few		Few					Few
10	IE_EA_10D020300	DERRY WATER_010	DERRY WATER	RS10D020300	Br NW of Moyne	Wicklow County Council	157.37	River Type 13	52.8632069	-6.4684212			Q4	3			04/07/2012	2012										Few												Few
10	IE_EA_10D020300	DERRY WATER_010	DERRY WATER	RS10D020300	Br NW of Moyne	Wicklow County Council	157.37	River Type 13	52.8632069	-6.4684212	Riffle Glide Pool		Q4-5	2	3		08/07/2015	2015													Few	Few			Few				Few
10	IE_EA_10D020300	DERRY WATER_010	DERRY WATER	RS10D020300	Br NW of Moyne	Wicklow County Council	157.37	River Type 13	52.8632069	-6.4684212	Riffle Glide Pool	No	Q4	3.5	3		11/07/2018	2018										Few							Few				Common
10	IE_EA_10D020600	DERRY WATER_020	DERRY WATER	RS10D020600	Ballinglen Br	Wicklow County Council	88.47	River Type 14	52.8232917	-6.4185422			Q5	2			25/06/2009	2009																						Few
10	IE_EA_10D020600	DERRY WATER_020	DERRY WATER	RS10D020600	Ballinglen Br	Wicklow County Council	88.47	River Type 14	52.8232917	-6.4185422			Q4-5	2	1		05/07/2012	2012															Few							Few
10	IE_EA_10D020600	DERRY WATER_020	DERRY WATER	RS10D020600	Ballinglen Br	Wicklow County Council	88.47	River Type 14	52.8232917	-6.4185422	Riffle Glide Pool		Q4-5	3	3		08/07/2015	2015														Few			Few				Few
10	IE_EA_10D020600	DERRY WATER_020	DERRY WATER	RS10D020600	Ballinglen Br	Wicklow County Council	88.47	River Type 14	52.8232917	-6.4185422	Riffle Glide Pool	No	Q4-5	2	1		11/07/2018	2018									Few								Few
10	IE_EA_10D020800	DERRY WATER_030	DERRY WATER	RS10D020800	Annacurragh Br	Wicklow County Council	72.89	River Type 14	52.840212	-6.3543371			Q3-4	3			25/06/2009	2009										Few				Few			Numerous
10	IE_EA_10D020800	DERRY WATER_030	DERRY WATER	RS10D020800	Annacurragh Br	Wicklow County Council	72.89	River Type 14	52.840212	-6.3543371			Q4	2			05/07/2012	2012										Few		Few		Common	Few		Few					Few
10	IE_EA_10D020800	DERRY WATER_030	DERRY WATER	RS10D020800	Annacurragh Br	Wicklow County Council	72.89	River Type 14	52.840212	-6.3543371	Intermediate		Q4-5	2	0.5		08/07/2015	2015										Few				Few	Few		Few				Few
10	IE_EA_10D020800	DERRY WATER_030	DERRY WATER	RS10D020800	Annacurragh Br	Wicklow County Council	72.89	River Type 14	52.840212	-6.3543371	Intermediate	No	Q4-5	2	1		28/06/2018	2018				Few										Few	Few		Few				Few
10	IE_EA_10G010200	GLENCREE_010	GLENCREE	RS10G010200	Br u/s Dargle R confl	Wicklow County Council	88.93	River Type 14	53.1706943	-6.2012975			Q3-4	3			15/10/2009	2009										Common				Common	Common		Few
10	IE_EA_10G010200	GLENCREE_010	GLENCREE	RS10G010200	Br u/s Dargle R confl	Wicklow County Council	88.93	River Type 14	53.1706943	-6.2012975			Q4	3	3		19/06/2012	2012										Few				Few	Few							Few
10	IE_EA_10G010200	GLENCREE_010	GLENCREE	RS10G010200	Br u/s Dargle R confl	Wicklow County Council	88.93	River Type 14	53.1706943	-6.2012975	Riffle Glide Pool		Q4-5	2	2		11/06/2015	2015										Few							Few
10	IE_EA_10G010200	GLENCREE_010	GLENCREE	RS10G010200	Br u/s Dargle R confl	Wicklow County Council	88.93	River Type 14	53.1706943	-6.2012975	Riffle Glide Pool	No	Q4-5	2	1		10/07/2018	2018										Few				Few			Few
10	IE_EA_10G020300	GLENCULLEN_010	GLENCULLEN	RS10G020050	Br N of Boranaraltry	Dun Laoghaire Rathdown County Council	89.36	River Type 14	53.2230008	-6.2500241			Q4	3			15/10/2009	2009																	Few
10	IE_EA_10G020300	GLENCULLEN_010	GLENCULLEN	RS10G020050	Br N of Boranaraltry	Dun Laoghaire Rathdown County Council	89.36	River Type 14	53.2230008	-6.2500241			Q4-5	3	2		19/06/2012	2012																	Few
10	IE_EA_10G020300	GLENCULLEN_010	GLENCULLEN	RS10G020050	Br N of Boranaraltry	Dun Laoghaire Rathdown County Council	89.36	River Type 14	53.2230008	-6.2500241	Riffle Glide Pool	No	Q4-5	2	2		09/06/2015	2015														Few			Few
10	IE_EA_10G020300	GLENCULLEN_010	GLENCULLEN	RS10G020050	Br N of Boranaraltry	Dun Laoghaire Rathdown County Council	89.36	River Type 14	53.2230008	-6.2500241	Riffle Glide Pool	No	Q4-5	2	1		10/07/2018	2018															Few		Few
10	IE_EA_10G020300	GLENCULLEN_010	GLENCULLEN	RS10G020300	2km u/s Enniskerry Br	Dun Laoghaire Rathdown County Council	89.36	River Type 14	53.1995707	-6.1818402			Q4-5	3			15/10/2009	2009																	Few					Few
10	IE_EA_10G020300	GLENCULLEN_010	GLENCULLEN	RS10G020300	2km u/s Enniskerry Br	Dun Laoghaire Rathdown County Council	89.36	River Type 14	53.1995707	-6.1818402			Q4-5	3	3		19/06/2012	2012
10	IE_EA_10G020300	GLENCULLEN_010	GLENCULLEN	RS10G020300	2km u/s Enniskerry Br	Dun Laoghaire Rathdown County Council	89.36	River Type 14	53.1995707	-6.1818402	Riffle Glide Pool	No	Q4	2	2		09/06/2015	2015										Few				Few			Few					Few
10	IE_EA_10G020300	GLENCULLEN_010	GLENCULLEN	RS10G020300	2km u/s Enniskerry Br	Dun Laoghaire Rathdown County Council	89.36	River Type 14	53.1995707	-6.1818402	Riffle Glide Pool	No	Q4-5	4	2		10/07/2018	2018																	Few
10	IE_EA_10G020500	GLENCULLEN_020	GLENCULLEN	RS10G020500	Just u/s Dargle R confl	Wicklow County Council	18.84	River Type 12	53.1904384	-6.1398774			Q4	3			07/07/2009	2009														Few
10	IE_EA_10G020500	GLENCULLEN_020	GLENCULLEN	RS10G020500	Just u/s Dargle R confl	Wicklow County Council	18.84	River Type 12	53.1904384	-6.1398774			Q4	2	2		14/06/2012	2012																						Few
10	IE_EA_10G020500	GLENCULLEN_020	GLENCULLEN	RS10G020500	Just u/s Dargle R confl	Wicklow County Council	18.84	River Type 12	53.1904384	-6.1398774	Riffle Glide Pool	No	Q4	3	2		11/06/2015	2015																						Few
10	IE_EA_10G020500	GLENCULLEN_020	GLENCULLEN	RS10G020500	Just u/s Dargle R confl	Wicklow County Council	18.84	River Type 12	53.1904384	-6.1398774	Riffle Glide Pool	No	Q4	2	1		10/07/2018	2018										Few	Few										Few
10	IE_EA_10G030200	GLENMACNASS_010	GLENMACNASS	RS10G030190	0.5km d/s Mall Brook	Wicklow County Council	218.62	River Type 14	53.0460744	-6.3282731			Q4	3			14/07/2009	2009														Common	Few		Few
10	IE_EA_10G030200	GLENMACNASS_010	GLENMACNASS	RS10G030190	0.5km d/s Mall Brook	Wicklow County Council	218.62	River Type 14	53.0460744	-6.3282731			Q3-4	3	3		23/10/2012	2012
10	IE_EA_10G030200	GLENMACNASS_010	GLENMACNASS	RS10G030190	0.5km d/s Mall Brook	Wicklow County Council	218.62	River Type 14	53.0460744	-6.3282731	Riffle Glide Pool		Q3-4	3	2		22/09/2015	2015
10	IE_EA_10G030200	GLENMACNASS_010	GLENMACNASS	RS10G030190	0.5km d/s Mall Brook	Wicklow County Council	218.62	River Type 14	53.0460744	-6.3282731	Riffle Glide Pool	No	Q4	2	2		12/06/2018	2018						Few											Few
10	IE_EA_10G030600	GLENMACNASS_020	GLENMACNASS	RS10G030600	Just u/s Avonmore R confl	Wicklow County Council	129.24	River Type 14	53.0069444	-6.2939538			Q4-5	2			16/10/2009	2009														Few			Few
10	IE_EA_10G030600	GLENMACNASS_020	GLENMACNASS	RS10G030600	Just u/s Avonmore R confl	Wicklow County Council	129.24	River Type 14	53.0069444	-6.2939538			Q4	3	2		12/10/2012	2012
10	IE_EA_10G030600	GLENMACNASS_020	GLENMACNASS	RS10G030600	Just u/s Avonmore R confl	Wicklow County Council	129.24	River Type 14	53.0069444	-6.2939538	Cascade Step Pool (CSP)		Q4	4	2		22/09/2015	2015										Few
10	IE_EA_10G030600	GLENMACNASS_020	GLENMACNASS	RS10G030600	Just u/s Avonmore R confl	Wicklow County Council	129.24	River Type 14	53.0069444	-6.2939538	Cascade Step Pool (CSP)	No	Q4	1.5	1.5		12/06/2018	2018														Few			Few
10	IE_EA_10G040500	GOLD MINE_010	GOLD MINE	RS10G040500	Br u/s Aughrim R confl	Wicklow County Council	15.99	River Type 14	52.8291846	-6.2351004			Q4	3			14/10/2009	2009										Few				Few
10	IE_EA_10G040500	GOLD MINE_010	GOLD MINE	RS10G040500	Br u/s Aughrim R confl	Wicklow County Council	15.99	River Type 14	52.8291846	-6.2351004			Q4	3	3		05/07/2012	2012														Few			Few
10	IE_EA_10G040500	GOLD MINE_010	GOLD MINE	RS10G040500	Br u/s Aughrim R confl	Wicklow County Council	15.99	River Type 14	52.8291846	-6.2351004	Riffle Glide Pool		Q4	2	2		14/07/2015	2015										Few				Few							Few
10	IE_EA_10G040500	GOLD MINE_010	GOLD MINE	RS10G040500	Br u/s Aughrim R confl	Wicklow County Council	15.99	River Type 14	52.8291846	-6.2351004	Riffle Glide Pool	No	Q4-5				28/06/2018	2018														Few			Few
10	IE_EA_10G050100	GLENEALO_010	GLENEALO	RS10G050100	GLENEALO - Ford u/s Upper Lake	Wicklow County Council	136.36	River Type 14	53.0050505	-6.3752293			Q4-5	3			28/10/2009	2009
10	IE_EA_10G050100	GLENEALO_010	GLENEALO	RS10G050100	GLENEALO - Ford u/s Upper Lake	Wicklow County Council	136.36	River Type 14	53.0050505	-6.3752293			Q4-5	4	4		11/10/2012	2012
10	IE_EA_10G050100	GLENEALO_010	GLENEALO	RS10G050100	GLENEALO - Ford u/s Upper Lake	Wicklow County Council	136.36	River Type 14	53.0050505	-6.3752293	Riffle Glide Pool		Q4	4.5	4		05/08/2015	2015																	Few
10	IE_EA_10G050100	GLENEALO_010	GLENEALO	RS10G050100	GLENEALO - Ford u/s Upper Lake	Wicklow County Council	136.36	River Type 14	53.0050505	-6.3752293	Riffle Glide Pool	No	Q4-5	6.5	2		14/06/2018	2018														Few
10	IE_EA_10G050400	GLENEALO_020	GLENEALO	RS10G050200	Br d/s Upper Lake	Wicklow County Council	118.45	River Type 14	53.0073888	-6.3448079			Q3-4	3			28/10/2009	2009														Few
10	IE_EA_10G050400	GLENEALO_020	GLENEALO	RS10G050200	Br d/s Upper Lake	Wicklow County Council	118.45	River Type 14	53.0073888	-6.3448079			Q3-4	3			11/10/2012	2012										Few				Few
10	IE_EA_10G050400	GLENEALO_020	GLENEALO	RS10G050200	Br d/s Upper Lake	Wicklow County Council	118.45	River Type 14	53.0073888	-6.3448079	Intermediate		Q3-4	2	1		05/08/2015	2015														Common			Few
10	IE_EA_10G050400	GLENEALO_020	GLENEALO	RS10G050200	Br d/s Upper Lake	Wicklow County Council	118.45	River Type 14	53.0073888	-6.3448079	Intermediate	No	Q3-4	2.5	1		13/06/2018	2018														Few			Few
10	IE_EA_10G050400	GLENEALO_020	GLENEALO	RS10G050400	Just u/s Avonmore R	Wicklow County Council	118.45	River Type 14	52.9994394	-6.2964397			Q5	2			18/06/2009	2009										Few					Few
10	IE_EA_10G050400	GLENEALO_020	GLENEALO	RS10G050400	Just u/s Avonmore R	Wicklow County Council	118.45	River Type 14	52.9994394	-6.2964397			Q4	3	1		23/10/2012	2012										Few				Few
10	IE_EA_10G050400	GLENEALO_020	GLENEALO	RS10G050400	Just u/s Avonmore R	Wicklow County Council	118.45	River Type 14	52.9994394	-6.2964397	Riffle Glide Pool		Q3-4	3	6		30/07/2015	2015										Few				Few	Few		Few
10	IE_EA_10G050400	GLENEALO_020	GLENEALO	RS10G050400	Just u/s Avonmore R	Wicklow County Council	118.45	River Type 14	52.9994394	-6.2964397	Riffle Glide Pool	No	Q4	2	0.5		12/06/2018	2018															Few		Few
10	IE_EA_10G060200	GLENDASAN_010	GLENDASAN	RS10G060100	GLENDASAN - Br nr Old Lead Works	Wicklow County Council	129.52	River Type 14	53.0232307	-6.3624688			Q4-5	3			28/10/2009	2009
10	IE_EA_10G060200	GLENDASAN_010	GLENDASAN	RS10G060100	GLENDASAN - Br nr Old Lead Works	Wicklow County Council	129.52	River Type 14	53.0232307	-6.3624688			Q4-5	3	3		23/10/2012	2012																	Few
10	IE_EA_10G060200	GLENDASAN_010	GLENDASAN	RS10G060100	GLENDASAN - Br nr Old Lead Works	Wicklow County Council	129.52	River Type 14	53.0232307	-6.3624688	Riffle Glide Pool		Q4-5	3	1.5		22/09/2015	2015
10	IE_EA_10G060200	GLENDASAN_010	GLENDASAN	RS10G060100	GLENDASAN - Br nr Old Lead Works	Wicklow County Council	129.52	River Type 14	53.0232307	-6.3624688	Cascade Step Pool (CSP)	No	Q4-5	3.5	1		12/06/2018	2018
10	IE_EA_10G060200	GLENDASAN_010	GLENDASAN	RS10G060200	Br u/s Glenealo R confl	Wicklow County Council	129.52	River Type 14	53.0109441	-6.3249409			Q4	3			28/10/2009	2009																	Few
10	IE_EA_10G060200	GLENDASAN_010	GLENDASAN	RS10G060200	Br u/s Glenealo R confl	Wicklow County Council	129.52	River Type 14	53.0109441	-6.3249409			Q4	2			11/10/2012	2012
10	IE_EA_10G060200	GLENDASAN_010	GLENDASAN	RS10G060200	Br u/s Glenealo R confl	Wicklow County Council	129.52	River Type 14	53.0109441	-6.3249409	Riffle Glide Pool		Q4	3	3		05/08/2015	2015																	Few
10	IE_EA_10G060200	GLENDASAN_010	GLENDASAN	RS10G060200	Br u/s Glenealo R confl	Wicklow County Council	129.52	River Type 14	53.0109441	-6.3249409	Riffle Glide Pool	No	Q4	2	1		12/06/2018	2018										Few							Few
10	IE_EA_10K010580	Kilcoole Stream_010	Kilcoole Stream	RS10K010250	Just d/s Br on R774	Wicklow County Council	3.51	River Type 12	53.115555	-6.0922809	Riffle Glide Pool		Q3-4	2	1		22/09/2015	2015		Single								Common				Few	Few						Common
10	IE_EA_10K020200	KILL OF THE GRANGE STREAM_010	KILL OF THE GRANGE STREAM	RS10K020200	Footbridge Meadowvale	Dun Laoghaire Rathdown County Council	33.3	River Type 12	53.2707727	-6.1542263			Q2-3	2			16/06/2009	2009		Few				Few		Few						Few			Numerous				Numerous
10	IE_EA_10K020200	KILL OF THE GRANGE STREAM_010	KILL OF THE GRANGE STREAM	RS10K020200	Footbridge Meadowvale	Dun Laoghaire Rathdown County Council	33.3	River Type 12	53.2707727	-6.1542263			Q3	2			11/06/2012	2012						Single		Few						Common			Common					Few
10	IE_EA_10K020200	KILL OF THE GRANGE STREAM_010	KILL OF THE GRANGE STREAM	RS10K020200	Footbridge Meadowvale	Dun Laoghaire Rathdown County Council	33.3	River Type 12	53.2707727	-6.1542263	Riffle Glide Pool	No	Q3	1.5	0.5		10/06/2015	2015						Few		Few		Few				Few	Few		Few					Numerous
10	IE_EA_10K020200	KILL OF THE GRANGE STREAM_010	KILL OF THE GRANGE STREAM	RS10K020200	Footbridge Meadowvale	Dun Laoghaire Rathdown County Council	33.3	River Type 12	53.2707727	-6.1542263	Riffle Glide Pool	No	Q2-3	2			19/06/2018	2018						Few								Few			Few				Common
10	IE_EA_10K020200	KILL OF THE GRANGE STREAM_010	KILL OF THE GRANGE STREAM	RS10K020500	Killiney Hill Rd Br	Dun Laoghaire Rathdown County Council	33.3	River Type 12	53.247177	-6.1198504			Q3	2			07/07/2009	2009		Few															Single					Excessive
10	IE_EA_10K020200	KILL OF THE GRANGE STREAM_010	KILL OF THE GRANGE STREAM	RS10K020500	Killiney Hill Rd Br	Dun Laoghaire Rathdown County Council	33.3	River Type 12	53.247177	-6.1198504			Q3	2	1		11/06/2012	2012		Few																				Excessive
10	IE_EA_10K020200	KILL OF THE GRANGE STREAM_010	KILL OF THE GRANGE STREAM	RS10K020500	Killiney Hill Rd Br	Dun Laoghaire Rathdown County Council	33.3	River Type 12	53.247177	-6.1198504	Riffle Glide Pool	No	Q3	1.5	1		10/06/2015	2015		Few													Few							Excessive
10	IE_EA_10K020200	KILL OF THE GRANGE STREAM_010	KILL OF THE GRANGE STREAM	RS10K020500	Killiney Hill Rd Br	Dun Laoghaire Rathdown County Council	33.3	River Type 12	53.247177	-6.1198504	Riffle Glide Pool	No	Q3	2	0.5		19/06/2018	2018		Few								Few											Excessive
10	IE_EA_10K030600	KILMACANOGE_010	KILMACANOGE	RS10K030090	New Culvert Br u/s Br at Kilmurry	Wicklow County Council	30.25	River Type 13	53.1521033	-6.1240468			Q3-4	2	1		14/06/2012	2012								Few		Few				Few			Few					Common
10	IE_EA_10K030600	KILMACANOGE_010	KILMACANOGE	RS10K030300	Br in Kilmacanoge	Wicklow County Council	30.25	River Type 13	53.1682762	-6.1342253			Q3-4	2			07/07/2009	2009		Single						Few						Few								Numerous
10	IE_EA_10K030600	KILMACANOGE_010	KILMACANOGE	RS10K030300	Br in Kilmacanoge	Wicklow County Council	30.25	River Type 13	53.1682762	-6.1342253			Q3-4	2	2		14/06/2012	2012								Few		Few				Few								Numerous
10	IE_EA_10K030600	KILMACANOGE_010	KILMACANOGE	RS10K030300	Br in Kilmacanoge	Wicklow County Council	30.25	River Type 13	53.1682762	-6.1342253	Riffle Glide Pool		Q3-4	2	3		02/07/2015	2015		Few						Few						Few							Common
10	IE_EA_10K030600	KILMACANOGE_010	KILMACANOGE	RS10K030300	Br in Kilmacanoge	Wicklow County Council	30.25	River Type 13	53.1682762	-6.1342253	Riffle Glide Pool	No	Q3-4	2	0.5		26/07/2018	2018		Single				Few		Few						Few	Few						Numerous
10	IE_EA_10N010600	NEWCASTLE (WICKLOW)_010	NEWCASTLE (WICKLOW)	RS10N010600	0.5km d/s Newcastle Br	Wicklow County Council	8.45	River Type 13	53.0709367	-6.0563528			Q3-4	2			17/07/2009	2009															Few							Numerous
10	IE_EA_10N010600	NEWCASTLE (WICKLOW)_010	NEWCASTLE (WICKLOW)	RS10N010600	0.5km d/s Newcastle Br	Wicklow County Council	8.45	River Type 13	53.0709367	-6.0563528			Q4	2	2		30/05/2012	2012														Few								Common
10	IE_EA_10N010600	NEWCASTLE (WICKLOW)_010	NEWCASTLE (WICKLOW)	RS10N010600	0.5km d/s Newcastle Br	Wicklow County Council	8.45	River Type 13	53.0709367	-6.0563528	Riffle Glide Pool	No	Q4	2	2		23/06/2015	2015														Few								Common
10	IE_EA_10N010600	NEWCASTLE (WICKLOW)_010	NEWCASTLE (WICKLOW)	RS10N010600	0.5km d/s Newcastle Br	Wicklow County Council	8.45	River Type 13	53.0709367	-6.0563528	Riffle Glide Pool		Q3-4	2	2		26/07/2018	2018														Few			Few				Dominant
10	IE_EA_10N020150	NEWTOWNMOUNTKENNEDY_010	NEWTOWNMOUNTKENNEDY	RS10N020100	Br nr Hermitage	Wicklow County Council	94.45	River Type 14	53.1061058	-6.1336693			Q4	2			14/07/2009	2009										Few					Few		Few					Dominant
10	IE_EA_10N020150	NEWTOWNMOUNTKENNEDY_010	NEWTOWNMOUNTKENNEDY	RS10N020100	Br nr Hermitage	Wicklow County Council	94.45	River Type 14	53.1061058	-6.1336693			Q4-5	2	1		29/05/2012	2012															Few							Few
10	IE_EA_10N020150	NEWTOWNMOUNTKENNEDY_010	NEWTOWNMOUNTKENNEDY	RS10N020100	Br nr Hermitage	Wicklow County Council	94.45	River Type 14	53.1061058	-6.1336693	Riffle Glide Pool		Q4-5	1.5	2		30/06/2015	2015																	Few				Few
10	IE_EA_10N020150	NEWTOWNMOUNTKENNEDY_010	NEWTOWNMOUNTKENNEDY	RS10N020100	Br nr Hermitage	Wicklow County Council	94.45	River Type 14	53.1061058	-6.1336693	Riffle Glide Pool	No	Q4-5	1.5	1		25/07/2018	2018																					Numerous
10	IE_EA_10N020150	NEWTOWNMOUNTKENNEDY_010	NEWTOWNMOUNTKENNEDY	RS10N020150	Woods at Cooladoyle	Wicklow County Council	94.45	River Type 14	53.1008612	-6.126272			Q4	2	2		29/05/2012	2012																						Few
10	IE_EA_10N020150	NEWTOWNMOUNTKENNEDY_010	NEWTOWNMOUNTKENNEDY	RS10N020150	Woods at Cooladoyle	Wicklow County Council	94.45	River Type 14	53.1008612	-6.126272	Riffle Glide Pool		Q4-5	2	2		30/06/2015	2015		Single												Few			Few				Few
10	IE_EA_10N020150	NEWTOWNMOUNTKENNEDY_010	NEWTOWNMOUNTKENNEDY	RS10N020150	Woods at Cooladoyle	Wicklow County Council	94.45	River Type 14	53.1008612	-6.126272	Riffle Glide Pool		Q4	3.5	2		25/07/2018	2018														Few							Few
10	IE_EA_10N020600	NEWTOWNMOUNTKENNEDY_020	NEWTOWNMOUNTKENNEDY	RS10N020400	NEWTOWNMOUNTKENNEDY - Br W of Springmount Ho	Wicklow County Council	15.55	River Type 13	53.0897046	-6.1094177			Q4	2	2		29/05/2012	2012														Few	Few							Few
10	IE_EA_10N020600	NEWTOWNMOUNTKENNEDY_020	NEWTOWNMOUNTKENNEDY	RS10N020400	NEWTOWNMOUNTKENNEDY - Br W of Springmount Ho	Wicklow County Council	15.55	River Type 13	53.0897046	-6.1094177	Riffle Glide Pool		Q4	2	2		30/06/2015	2015																	Few					Common
10	IE_EA_10N020600	NEWTOWNMOUNTKENNEDY_020	NEWTOWNMOUNTKENNEDY	RS10N020400	NEWTOWNMOUNTKENNEDY - Br W of Springmount Ho	Wicklow County Council	15.55	River Type 13	53.0897046	-6.1094177	Riffle Glide Pool		Q4	3	2		25/07/2018	2018										Few			Few				Few				Numerous
10	IE_EA_10N020600	NEWTOWNMOUNTKENNEDY_020	NEWTOWNMOUNTKENNEDY	RS10N020500	NEWTOWNMOUNTKENNEDY - Br nr Kilmullin	Wicklow County Council	15.55	River Type 13	53.0930064	-6.0849639			Q3-4	2	2		29/05/2012	2012										Few				Few	Few							Few
10	IE_EA_10N020600	NEWTOWNMOUNTKENNEDY_020	NEWTOWNMOUNTKENNEDY	RS10N020500	NEWTOWNMOUNTKENNEDY - Br nr Kilmullin	Wicklow County Council	15.55	River Type 13	53.0930064	-6.0849639	Riffle Glide Pool		Q3	2	2		23/06/2015	2015														Few	Few		Few					Few
10	IE_EA_10N020600	NEWTOWNMOUNTKENNEDY_020	NEWTOWNMOUNTKENNEDY	RS10N020500	NEWTOWNMOUNTKENNEDY - Br nr Kilmullin	Wicklow County Council	15.55	River Type 13	53.0930064	-6.0849639	Riffle Glide Pool	No	Q3	2	1		25/07/2018	2018														Few	Few		Few				Numerous
10	IE_EA_10N020600	NEWTOWNMOUNTKENNEDY_020	NEWTOWNMOUNTKENNEDY	RS10N020600	Br S of Ballyphilip	Wicklow County Council	15.55	River Type 13	53.0911722	-6.0653735			Q3	2			16/07/2009	2009										Few				Few								Dominant
10	IE_EA_10N020600	NEWTOWNMOUNTKENNEDY_020	NEWTOWNMOUNTKENNEDY	RS10N020600	Br S of Ballyphilip	Wicklow County Council	15.55	River Type 13	53.0911722	-6.0653735			Q3-4	2	3		29/05/2012	2012		Few												Few	Few		Few					Common
10	IE_EA_10N020600	NEWTOWNMOUNTKENNEDY_020	NEWTOWNMOUNTKENNEDY	RS10N020600	Br S of Ballyphilip	Wicklow County Council	15.55	River Type 13	53.0911722	-6.0653735	Riffle Glide Pool	No	Q3	2	2		23/06/2015	2015										Few				Few	Few		Few
10	IE_EA_10N020600	NEWTOWNMOUNTKENNEDY_020	NEWTOWNMOUNTKENNEDY	RS10N020600	Br S of Ballyphilip	Wicklow County Council	15.55	River Type 13	53.0911722	-6.0653735	Riffle Glide Pool	No	Q3-4	2	1		25/07/2018	2018										Few				Few
10	IE_EA_10O010100	OW_010	OW	RS10O010100	Br near Aghavannagh Bks	Wicklow County Council	200.72	River Type 14	52.9154085	-6.4304779			Q3-4	3			06/08/2009	2009
10	IE_EA_10O010100	OW_010	OW	RS10O010100	Br near Aghavannagh Bks	Wicklow County Council	200.72	River Type 14	52.9154085	-6.4304779			Q3-4	3	1		04/07/2012	2012
10	IE_EA_10O010100	OW_010	OW	RS10O010100	Br near Aghavannagh Bks	Wicklow County Council	200.72	River Type 14	52.9154085	-6.4304779	Riffle Glide Pool		Q3-4	3	2		28/07/2015	2015														Few			Few
10	IE_EA_10O010100	OW_010	OW	RS10O010100	Br near Aghavannagh Bks	Wicklow County Council	200.72	River Type 14	52.9154085	-6.4304779	Riffle Glide Pool	No	Q4	3	2		26/06/2018	2018															Few		Few
10	IE_EA_10O010300	OW_020	OW	RS10O010300	Ballymanus Br	Wicklow County Council	107.96	River Type 14	52.8735175	-6.3766033			Q3-4	2			25/06/2009	2009														Few	Few
10	IE_EA_10O010300	OW_020	OW	RS10O010300	Ballymanus Br	Wicklow County Council	107.96	River Type 14	52.8735175	-6.3766033			Q4	3	2		04/07/2012	2012
10	IE_EA_10O010300	OW_020	OW	RS10O010300	Ballymanus Br	Wicklow County Council	107.96	River Type 14	52.8735175	-6.3766033	Riffle Glide Pool		Q4	2	3		07/07/2015	2015														Few			Few
10	IE_EA_10O010300	OW_020	OW	RS10O010300	Ballymanus Br	Wicklow County Council	107.96	River Type 14	52.8735175	-6.3766033	Riffle Glide Pool	No	Q4	4	2		26/06/2018	2018														Few			Few
10	IE_EA_10O010400	OW_030	OW	RS10O010400	Roddenagh Br	Wicklow County Council	73.14	River Type 14	52.8512712	-6.3408266			Q4	2	1		04/07/2012	2012														Few			Few					Few
10	IE_EA_10O010400	OW_030	OW	RS10O010400	Roddenagh Br	Wicklow County Council	73.14	River Type 14	52.8512712	-6.3408266	Riffle Glide Pool		Q4	4	2.5		07/07/2015	2015														Few			Few				Few
10	IE_EA_10O010400	OW_030	OW	RS10O010400	Roddenagh Br	Wicklow County Council	73.14	River Type 14	52.8512712	-6.3408266	Riffle Glide Pool	No	Q4	2	1.5		27/06/2018	2018														Few			Common				Single
10	IE_EA_10P010300	POTTER'S_010	POTTER'S	RS10P010300	Kilboy Br	Wicklow County Council	28.36	River Type 12	52.9238461	-6.1120631			Q3	2			08/10/2009	2009		Few												Few								Common
10	IE_EA_10P010300	POTTER'S_010	POTTER'S	RS10P010300	Kilboy Br	Wicklow County Council	28.36	River Type 12	52.9238461	-6.1120631			Q3-4	2			03/07/2012	2012										Common				Few	Few		Few					Numerous
10	IE_EA_10P010300	POTTER'S_010	POTTER'S	RS10P010300	Kilboy Br	Wicklow County Council	28.36	River Type 12	52.9238461	-6.1120631	Riffle Glide Pool		Q3-4	1.5	1		01/07/2015	2015		Few						Few		Few				Few	Few		Few				Common
10	IE_EA_10P010300	POTTER'S_010	POTTER'S	RS10P010300	Kilboy Br	Wicklow County Council	28.36	River Type 12	52.9238461	-6.1120631			Q3-4	2	1		24/07/2018	2018													Few	Few	Few		Few				Common
10	IE_EA_10P010500	POTTER'S_020	POTTER'S	RS10P010500	Castletimon Br	Wicklow County Council	14.3	River Type 12	52.9020024	-6.0714172			Q3-4	2			08/10/2009	2009														Few			Few					Dominant
10	IE_EA_10P010500	POTTER'S_020	POTTER'S	RS10P010500	Castletimon Br	Wicklow County Council	14.3	River Type 12	52.9020024	-6.0714172			Q4	2			03/07/2012	2012														Few	Few		Few					Dominant
10	IE_EA_10P010500	POTTER'S_020	POTTER'S	RS10P010500	Castletimon Br	Wicklow County Council	14.3	River Type 12	52.9020024	-6.0714172	Riffle Glide Pool		Q4	2	2		30/06/2015	2015		Few													Few		Few				Common
10	IE_EA_10P010500	POTTER'S_020	POTTER'S	RS10P010500	Castletimon Br	Wicklow County Council	14.3	River Type 12	52.9020024	-6.0714172	Intermediate	No	Q4	2	1		12/07/2018	2018														Few			Few				Common
10	IE_EA_10R010100	REDCROSS_010	REDCROSS	RS10R010100	Br in Redcross	Wicklow County Council	42.13	River Type 14	52.8925513	-6.1409147			Q4	2			08/10/2009	2009										Few				Few			Few					Common
10	IE_EA_10R010100	REDCROSS_010	REDCROSS	RS10R010100	Br in Redcross	Wicklow County Council	42.13	River Type 14	52.8925513	-6.1409147			Q4	2	1		03/07/2012	2012		Few		Single										Few	Few		Few					Few
10	IE_EA_10R010100	REDCROSS_010	REDCROSS	RS10R010100	Br in Redcross	Wicklow County Council	42.13	River Type 14	52.8925513	-6.1409147	Riffle Glide Pool		Q4	2	3		01/07/2015	2015		Few								Few							Few				Few
10	IE_EA_10R010100	REDCROSS_010	REDCROSS	RS10R010100	Br in Redcross	Wicklow County Council	42.13	River Type 14	52.8925513	-6.1409147	Riffle Glide Pool	No	Q4	1	1		12/07/2018	2018										Few				Few			Few				Common
10	IE_EA_10R010300	REDCROSS_020	REDCROSS	RS10R010300	Kilpatrick Br	Wicklow County Council	17.95	River Type 12	52.8649846	-6.1201769			Q4	3			08/10/2009	2009														Few	Few		Few					Dominant
10	IE_EA_10R010300	REDCROSS_020	REDCROSS	RS10R010300	Kilpatrick Br	Wicklow County Council	17.95	River Type 12	52.8649846	-6.1201769			Q4	2	1		24/05/2012	2012														Few	Few		Few					Common
10	IE_EA_10R010300	REDCROSS_020	REDCROSS	RS10R010300	Kilpatrick Br	Wicklow County Council	17.95	River Type 12	52.8649846	-6.1201769	Riffle Glide Pool		Q4	2	4		01/07/2015	2015														Few			Few				Numerous
10	IE_EA_10R010300	REDCROSS_020	REDCROSS	RS10R010300	Kilpatrick Br	Wicklow County Council	17.95	River Type 12	52.8649846	-6.1201769	Riffle Glide Pool	No	Q4-5	2	1		12/07/2018	2018														Few			Few				Numerous
10	IE_EA_10R020600	RATHNEW STREAM_010	RATHNEW STREAM	RS10R020600	Br in Rathnew Village	Wicklow County Council	9.42	River Type 13	52.9956793	-6.0826611			Q3-4	3			19/10/2009	2009										Few				Few								Few
10	IE_EA_10R020600	RATHNEW STREAM_010	RATHNEW STREAM	RS10R020600	Br in Rathnew Village	Wicklow County Council	9.42	River Type 13	52.9956793	-6.0826611			Q3-4	2	1		30/05/2012	2012														Few								Few
10	IE_EA_10R020600	RATHNEW STREAM_010	RATHNEW STREAM	RS10R020600	Br in Rathnew Village	Wicklow County Council	9.42	River Type 13	52.9956793	-6.0826611	Riffle Glide Pool		Q4	1.5	2		01/07/2015	2015		Single												Few			Few				Common
10	IE_EA_10R020600	RATHNEW STREAM_010	RATHNEW STREAM	RS10R020600	Br in Rathnew Village	Wicklow County Council	9.42	River Type 13	52.9956793	-6.0826611	Riffle Glide Pool	No	Q3	3	1.5		24/07/2018	2018							Single							Few			Few				Common
10	IE_EA_10S010600	SHANGANAGH_010	SHANGANAGH	RS10S010460	Br SSW of Carns (Heron Ford Lane)	Dun Laoghaire Rathdown County Council	5.24	River Type 13	53.2369369	-6.1552541			Q4	2			16/06/2009	2009										Few				Few	Few		Few				Few
10	IE_EA_10S010600	SHANGANAGH_010	SHANGANAGH	RS10S010460	Br SSW of Carns (Heron Ford Lane)	Dun Laoghaire Rathdown County Council	5.24	River Type 13	53.2369369	-6.1552541			Q4	2	2		11/06/2012	2012																						Few
10	IE_EA_10S010600	SHANGANAGH_010	SHANGANAGH	RS10S010460	Br SSW of Carns (Heron Ford Lane)	Dun Laoghaire Rathdown County Council	5.24	River Type 13	53.2369369	-6.1552541	Riffle Glide Pool	No	Q4	2	2		10/06/2015	2015														Few								Few
10	IE_EA_10S010600	SHANGANAGH_010	SHANGANAGH	RS10S010460	Br SSW of Carns (Heron Ford Lane)	Dun Laoghaire Rathdown County Council	5.24	River Type 13	53.2369369	-6.1552541	Cascade Step Pool (CSP)	No	Q4	2	1		19/06/2018	2018																					Few
10	IE_EA_10S010600	SHANGANAGH_010	SHANGANAGH	RS10S010600	At Commons Road	Dun Laoghaire Rathdown County Council	5.24	River Type 13	53.2422091	-6.1216612			Q3-4	3			16/06/2009	2009																					Few
10	IE_EA_10S010600	SHANGANAGH_010	SHANGANAGH	RS10S010600	At Commons Road	Dun Laoghaire Rathdown County Council	5.24	River Type 13	53.2422091	-6.1216612			Q4	2	1		11/06/2012	2012		Single												Few			Few					Common
10	IE_EA_10S010600	SHANGANAGH_010	SHANGANAGH	RS10S010600	At Commons Road	Dun Laoghaire Rathdown County Council	5.24	River Type 13	53.2422091	-6.1216612			Q4	2	1		10/06/2015	2015														Few			Few					Few
10	IE_EA_10S010600	SHANGANAGH_010	SHANGANAGH	RS10S010600	At Commons Road	Dun Laoghaire Rathdown County Council	5.24	River Type 13	53.2422091	-6.1216612	Riffle Glide Pool	No	Q3-4	3.5	1.5		19/06/2018	2018														Few			Few				Few
10	IE_EA_10T010300	THREE MILE WATER_010	THREE MILE WATER	RS10T010300	Br S of Ballinteskin X rds	Wicklow County Council	36.53	River Type 13	52.9436725	-6.0751625			Q4	2			08/10/2009	2009								Single		Few				Few	Few							Common
10	IE_EA_10T010300	THREE MILE WATER_010	THREE MILE WATER	RS10T010300	Br S of Ballinteskin X rds	Wicklow County Council	36.53	River Type 13	52.9436725	-6.0751625			Q4	2	1		03/07/2012	2012														Few	Few							Common
10	IE_EA_10T010300	THREE MILE WATER_010	THREE MILE WATER	RS10T010300	Br S of Ballinteskin X rds	Wicklow County Council	36.53	River Type 13	52.9436725	-6.0751625	Riffle Glide Pool		Q4	2	2		30/06/2015	2015										Few					Few						Common
10	IE_EA_10T010500	THREE MILE WATER_020	THREE MILE WATER	RS10T010500	THREE MILE WATER - Br nr Magherabeg	Wicklow County Council	15.77	River Type 12	52.9274539	-6.0411566			Q4	2	2		03/07/2012	2012														Few	Few							Common
10	IE_EA_10T010500	THREE MILE WATER_020	THREE MILE WATER	RS10T010500	THREE MILE WATER - Br nr Magherabeg	Wicklow County Council	15.77	River Type 12	52.9274539	-6.0411566	Riffle Glide Pool		Q3-4	2	4		30/06/2015	2015										Few				Few							Common
10	IE_EA_10T010500	THREE MILE WATER_020	THREE MILE WATER	RS10T010500	THREE MILE WATER - Br nr Magherabeg	Wicklow County Council	15.77	River Type 12	52.9274539	-6.0411566	Riffle Glide Pool		Q4	2	1		24/07/2018	2018							Single			Few				Few	Few		Few				Dominant
10	IE_EA_10T040500	TEMPLERAINY STREAM_010	TEMPLERAINY STREAM	RS10T040500	Porter's Br	Wicklow County Council	7.66	River Type 13	52.8096325	-6.1365914			Q4	3			08/10/2009	2009														Few	Few		Few					Common
10	IE_EA_10T040500	TEMPLERAINY STREAM_010	TEMPLERAINY STREAM	RS10T040500	Porter's Br	Wicklow County Council	7.66	River Type 13	52.8096325	-6.1365914			Q4	2	1		24/05/2012	2012										Few				Few	Few							Common
10	IE_EA_10T040500	TEMPLERAINY STREAM_010	TEMPLERAINY STREAM	RS10T040500	Porter's Br	Wicklow County Council	7.66	River Type 13	52.8096325	-6.1365914	Riffle Glide Pool		Q4	2	2		14/07/2015	2015										Few				Few							Numerous
10	IE_EA_10T040500	TEMPLERAINY STREAM_010	TEMPLERAINY STREAM	RS10T040500	Porter's Br	Wicklow County Council	7.66	River Type 13	52.8096325	-6.1365914	Riffle Glide Pool	No	Q4	2	0.5		12/07/2018	2018		Few												Few	Few						Numerous
10	IE_EA_10V010050	VARTRY_010	VARTRY	RS10V010050	Ballinastoe Br	Wicklow County Council	229.57	River Type 14	53.1044093	-6.1798279			Q4	3			16/07/2009	2009										Few							Few					Common
10	IE_EA_10V010050	VARTRY_010	VARTRY	RS10V010050	Ballinastoe Br	Wicklow County Council	229.57	River Type 14	53.1044093	-6.1798279			Q4-5	2	2		19/06/2012	2012														Few			Few					Few
10	IE_EA_10V010050	VARTRY_010	VARTRY	RS10V010050	Ballinastoe Br	Wicklow County Council	229.57	River Type 14	53.1044093	-6.1798279	Intermediate	No	Q4-5	2	1		11/06/2015	2015																	Few					Few
10	IE_EA_10V010050	VARTRY_010	VARTRY	RS10V010050	Ballinastoe Br	Wicklow County Council	229.57	River Type 14	53.1044093	-6.1798279	Riffle Glide Pool	No	Q4	1.5	1		25/07/2018	2018																	Few				Few
10	IE_EA_10V010100	VARTRY_020	VARTRY	RS10V010100	Annagolan Br	Wicklow County Council	165.41	River Type 12	53.0299094	-6.1795411			Q4	2			17/07/2009	2009										Few				Common	Few							Common
10	IE_EA_10V010100	VARTRY_020	VARTRY	RS10V010100	Annagolan Br	Wicklow County Council	165.41	River Type 12	53.0299094	-6.1795411			Q4	2	1		30/05/2012	2012																	Few					Few
10	IE_EA_10V010100	VARTRY_020	VARTRY	RS10V010100	Annagolan Br	Wicklow County Council	165.41	River Type 12	53.0299094	-6.1795411	Riffle Glide Pool	No	Q4	2	1		16/06/2015	2015														Single			Few					Few
10	IE_EA_10V010100	VARTRY_020	VARTRY	RS10V010100	Annagolan Br	Wicklow County Council	165.41	River Type 12	53.0299094	-6.1795411	Riffle Glide Pool	No	Q4	2	1		25/07/2018	2018										Few				Few	Few		Few				Common
10	IE_EA_10V010150	VARTRY_030	VARTRY	RS10V010150	Nun's Cross Br	Wicklow County Council	35.09	River Type 13	53.0161467	-6.125848			Q4	2	3		30/05/2012	2012														Few			Few
10	IE_EA_10V010150	VARTRY_030	VARTRY	RS10V010150	Nun's Cross Br	Wicklow County Council	35.09	River Type 13	53.0161467	-6.125848	Riffle Glide Pool		Q4	2	1		16/06/2015	2015														Single			Few
10	IE_EA_10V010150	VARTRY_030	VARTRY	RS10V010150	Nun's Cross Br	Wicklow County Council	35.09	River Type 13	53.0161467	-6.125848	Riffle Glide Pool		Q4	2	1		24/07/2018	2018														Few	Few		Few
10	IE_EA_10V010300	VARTRY_040	VARTRY	RS10V010250	Rossana House (300m d/s STP outfall)	Wicklow County Council	7.62	River Type 12	53.0059415	-6.0958925			Q3-4	3			19/07/2009	2009		Common												Few			Few					Common
10	IE_EA_10V010300	VARTRY_040	VARTRY	RS10V010300	Newrath Br	Wicklow County Council	7.62	River Type 12	53.0058202	-6.084513			Q3-4	3			17/07/2009	2009		Few										Few		Few			Few					Few
10	IE_EA_10V010300	VARTRY_040	VARTRY	RS10V010300	Newrath Br	Wicklow County Council	7.62	River Type 12	53.0058202	-6.084513			Q4	2	2		30/05/2012	2012		Few								Few				Few	Few		Single
10	IE_EA_10V010300	VARTRY_040	VARTRY	RS10V010300	Newrath Br	Wicklow County Council	7.62	River Type 12	53.0058202	-6.084513	Riffle Glide Pool	No	Q4	2	2		23/06/2015	2015		Few															Few
10	IE_EA_10V010300	VARTRY_040	VARTRY	RS10V010300	Newrath Br	Wicklow County Council	7.62	River Type 12	53.0058202	-6.084513	Riffle Glide Pool	No	Q4	2	1		24/07/2018	2018		Single												Few	Few		Few
11	IE_SE_11A020200	AUGHBOY (WEXFORD)_010	AUGHBOY (WEXFORD)	RS11A020180	Riverchapel Br (NE of Middletown Ho)	Wexford County Council	5.39	River Type 12	52.6361881	-6.2330362			Q2-3	2			19/06/2007	2007																	Few					Dominant
11	IE_SE_11A020200	AUGHBOY (WEXFORD)_010	AUGHBOY (WEXFORD)	RS11A020180	Riverchapel Br (NE of Middletown Ho)	Wexford County Council	5.39	River Type 12	52.6361881	-6.2330362			Q2-3	2			10/09/2010	2010														Few							Few
11	IE_SE_11A020200	AUGHBOY (WEXFORD)_010	AUGHBOY (WEXFORD)	RS11A020180	Riverchapel Br (NE of Middletown Ho)	Wexford County Council	5.39	River Type 12	52.6361881	-6.2330362			Q2	3	1		17/08/2013	2013														Common							Common
11	IE_SE_11A020200	AUGHBOY (WEXFORD)_010	AUGHBOY (WEXFORD)	RS11A020180	Riverchapel Br (NE of Middletown Ho)	Wexford County Council	5.39	River Type 12	52.6361881	-6.2330362	Riffle Glide Pool		Q2-3	2	1		22/08/2015	2015							Common							Common			Few				Few
11	IE_SE_11A020200	AUGHBOY (WEXFORD)_010	AUGHBOY (WEXFORD)	RS11A020180	Riverchapel Br (NE of Middletown Ho)	Wexford County Council	5.39	River Type 12	52.6361881	-6.2330362	Riffle Glide Pool		Q3	2			31/08/2017	2017					Few				Single					Few			Few				Common
11	IE_SE_11A020200	AUGHBOY (WEXFORD)_010	AUGHBOY (WEXFORD)	RS11A020200	Br at Riverchapel	Wexford County Council	5.39	River Type 12	52.6383929	-6.2345273			Q2	3			13/09/2007	2007						Few	Few										Few					Few
11	IE_SE_11A020200	AUGHBOY (WEXFORD)_010	AUGHBOY (WEXFORD)	RS11A020200	Br at Riverchapel	Wexford County Council	5.39	River Type 12	52.6383929	-6.2345273			Q2	2			03/10/2008	2008							Single							Single			Common					Few
11	IE_SE_11A020200	AUGHBOY (WEXFORD)_010	AUGHBOY (WEXFORD)	RS11A020200	Br at Riverchapel	Wexford County Council	5.39	River Type 12	52.6383929	-6.2345273			Q2-3	2			14/10/2009	2009		Few						Few									Few					Common
11	IE_SE_11A020200	AUGHBOY (WEXFORD)_010	AUGHBOY (WEXFORD)	RS11A020200	Br at Riverchapel	Wexford County Council	5.39	River Type 12	52.6383929	-6.2345273			Q1-2	4			17/08/2013	2013														Few							Common
11	IE_SE_11A020200	AUGHBOY (WEXFORD)_010	AUGHBOY (WEXFORD)	RS11A020200	Br at Riverchapel	Wexford County Council	5.39	River Type 12	52.6383929	-6.2345273	Riffle Glide Pool		Q1-2	2			31/08/2017	2017														Few			Few
11	IE_SE_11A020200	AUGHBOY (WEXFORD)_010	AUGHBOY (WEXFORD)	RS11A020200	Br at Riverchapel	Wexford County Council	5.39	River Type 12	52.6383929	-6.2345273	Riffle Glide Pool	No	Q1-2	3			02/08/2018	2018																	Few				Few
11	IE_SE_11A030035	ASKINCH UPPER STREAM_010	ASKINCH UPPER STREAM	RS11A030035	Br d/s Ballykilty Br	Wexford County Council	28.35	River Type 13	52.7593157	-6.2179388			Q2-3	2			19/06/2007	2007																Few	Common					Few
11	IE_SE_11A030035	ASKINCH UPPER STREAM_010	ASKINCH UPPER STREAM	RS11A030035	Br d/s Ballykilty Br	Wexford County Council	28.35	River Type 13	52.7593157	-6.2179388			Q3	2	2		09/09/2010	2010		Few					Few			Few							Few
11	IE_SE_11A030035	ASKINCH UPPER STREAM_010	ASKINCH UPPER STREAM	RS11A030035	Br d/s Ballykilty Br	Wexford County Council	28.35	River Type 13	52.7593157	-6.2179388			Q2-3	4	1		02/08/2013	2013														Few
11	IE_SE_11A030035	ASKINCH UPPER STREAM_010	ASKINCH UPPER STREAM	RS11A030035	Br d/s Ballykilty Br	Wexford County Council	28.35	River Type 13	52.7593157	-6.2179388	Riffle Glide Pool		Q3				30/08/2017	2017		Single												Few			Few
11	IE_SE_11B010300	BALLYEDMOND_010	BALLYEDMOND	RS11B010300	Ballyedmond (Old) Br	Wexford County Council	48.93	River Type 12	52.5462226	-6.3359698			Q3	2			25/06/2007	2007		Few								Few												Dominant
11	IE_SE_11B010300	BALLYEDMOND_010	BALLYEDMOND	RS11B010300	Ballyedmond (Old) Br	Wexford County Council	48.93	River Type 12	52.5462226	-6.3359698			Q3	2	1		13/09/2010	2010		Single																			Few
11	IE_SE_11B010300	BALLYEDMOND_010	BALLYEDMOND	RS11B010300	Ballyedmond (Old) Br	Wexford County Council	48.93	River Type 12	52.5462226	-6.3359698			Q3	3	1		21/09/2013	2013														Common	Few		Single				Numerous
11	IE_SE_11B010300	BALLYEDMOND_010	BALLYEDMOND	RS11B010300	Ballyedmond (Old) Br	Wexford County Council	48.93	River Type 12	52.5462226	-6.3359698	Riffle Glide Pool		Q3	2	2		28/08/2017	2017		Few							Few	Few				Few			Few				Common
11	IE_SE_11B020100	BANOGE_010	BANOGE	RS11B020050	BANOGE - Br near Killynann	Wexford County Council	38.47	River Type 12	52.6993902	-6.2940614			Q3-4	2	1		09/09/2010	2010																					Few
11	IE_SE_11B020100	BANOGE_010	BANOGE	RS11B020050	BANOGE - Br near Killynann	Wexford County Council	38.47	River Type 12	52.6993902	-6.2940614			Q3-4	3	1		03/08/2013	2013														Few	Few		Few				Numerous
11	IE_SE_11B020100	BANOGE_010	BANOGE	RS11B020050	BANOGE - Br near Killynann	Wexford County Council	38.47	River Type 12	52.6993902	-6.2940614	Riffle Glide Pool		Q3	6			31/08/2017	2017							Single							Few							Few
11	IE_SE_11B020200	BANOGE_020	BANOGE	RS11B020200	2 km S of Gorey (Knockduff)	Wexford County Council	27.33	River Type 12	52.6602668	-6.2887577			Q2-3	2			26/06/2007	2007		Few							Few								Few					Common
11	IE_SE_11B020200	BANOGE_020	BANOGE	RS11B020200	2 km S of Gorey (Knockduff)	Wexford County Council	27.33	River Type 12	52.6602668	-6.2887577			Q2-3	2			09/09/2010	2010		Common																			Few
11	IE_SE_11B020200	BANOGE_020	BANOGE	RS11B020200	2 km S of Gorey (Knockduff)	Wexford County Council	27.33	River Type 12	52.6602668	-6.2887577			Q2-3	4			17/08/2013	2013							Few							Common			Few				Few
11	IE_SE_11B020200	BANOGE_020	BANOGE	RS11B020200	2 km S of Gorey (Knockduff)	Wexford County Council	27.33	River Type 12	52.6602668	-6.2887577	Riffle Glide Pool		Q3	2			31/08/2017	2017					Few			Few		Few							Few				Few
11	IE_SE_11B020300	BANOGE_030	BANOGE	RS11B020300	Br u/s Owenavorragh R confl	Wexford County Council	15.94	River Type 12	52.646036	-6.2876238			Q3	2			25/06/2007	2007														Few			Few					Common
11	IE_SE_11B020300	BANOGE_030	BANOGE	RS11B020300	Br u/s Owenavorragh R confl	Wexford County Council	15.94	River Type 12	52.646036	-6.2876238			Q3	2	1		09/09/2010	2010																	Few				Few
11	IE_SE_11B020300	BANOGE_030	BANOGE	RS11B020300	Br u/s Owenavorragh R confl	Wexford County Council	15.94	River Type 12	52.646036	-6.2876238			Q3	3	1		17/08/2013	2013							Few							Few			Few				Few
11	IE_SE_11B020300	BANOGE_030	BANOGE	RS11B020300	Br u/s Owenavorragh R confl	Wexford County Council	15.94	River Type 12	52.646036	-6.2876238	Riffle Glide Pool		Q3-4	2	5		29/08/2017	2017						Few				Few							Few				Few
11	IE_SE_11B030300	BLACKWATER (WEXFORD)_010	BLACKWATER (WEXFORD)	RS11B030200	Footbridge E of Blackwater at Mil	Wexford County Council	0	River Type 12	52.4449402	-6.3397803			Q3-4	2			25/06/2007	2007										Few							Few					Excessive
11	IE_SE_11B030300	BLACKWATER (WEXFORD)_010	BLACKWATER (WEXFORD)	RS11B030200	Footbridge E of Blackwater at Mil	Wexford County Council	0	River Type 12	52.4449402	-6.3397803			Q3-4	2	1		13/09/2010	2010										Few											Numerous
11	IE_SE_11B030300	BLACKWATER (WEXFORD)_010	BLACKWATER (WEXFORD)	RS11B030200	Footbridge E of Blackwater at Mil	Wexford County Council	0	River Type 12	52.4449402	-6.3397803			Q3	3	1		21/09/2013	2013														Few							Dominant
11	IE_SE_11B030300	BLACKWATER (WEXFORD)_010	BLACKWATER (WEXFORD)	RS11B030200	Footbridge E of Blackwater at Mil	Wexford County Council	0	River Type 12	52.4449402	-6.3397803	Riffle Glide Pool		Q3-4	2	5		28/08/2017	2017														Few							Common
11	IE_SE_11B030300	BLACKWATER (WEXFORD)_010	BLACKWATER (WEXFORD)	RS11B030300	River Gap	Wexford County Council	0	River Type 12	52.4295567	-6.3282328			Q3-4	3			13/09/2007	2007							Few			Few				Few			Few					Dominant
11	IE_SE_11B040200	BRACKAN_010	BRACKAN	RS11B040100	Toberanieran Br	Wexford County Council	22.75	River Type 12	52.6218678	-6.3566959			Q4	2	1		10/09/2010	2010																Few	Few				Dominant
11	IE_SE_11B040200	BRACKAN_010	BRACKAN	RS11B040100	Toberanieran Br	Wexford County Council	22.75	River Type 12	52.6218678	-6.3566959			Q4	5	1		17/08/2013	2013							Single						Single								Numerous
11	IE_SE_11B040200	BRACKAN_010	BRACKAN	RS11B040100	Toberanieran Br	Wexford County Council	22.75	River Type 12	52.6218678	-6.3566959	Riffle Glide Pool		Q4	2	5		29/08/2017	2017										Few				Few	Few						Few
11	IE_SE_11B040200	BRACKAN_010	BRACKAN	RS11B040200	Essex Br	Wexford County Council	22.75	River Type 12	52.6277088	-6.3051855			Q4	2			25/06/2007	2007		Few					Few			Few				Few			Few					Dominant
11	IE_SE_11B040200	BRACKAN_010	BRACKAN	RS11B040200	Essex Br	Wexford County Council	22.75	River Type 12	52.6277088	-6.3051855			Q3-4	2	1		10/09/2010	2010										Few											Common
11	IE_SE_11B040200	BRACKAN_010	BRACKAN	RS11B040200	Essex Br	Wexford County Council	22.75	River Type 12	52.6277088	-6.3051855			Q4	4	1		17/08/2013	2013						Single				Few				Single	Few						Numerous
11	IE_SE_11B040200	BRACKAN_010	BRACKAN	RS11B040200	Essex Br	Wexford County Council	22.75	River Type 12	52.6277088	-6.3051855	Riffle Glide Pool		Q3-4	4	5		28/08/2017	2017							Few							Few							Few
11	IE_SE_11C010100	CLONOUGH_010	CLONOUGH	RS11C010050	CLONOUGH - Br SW of Coolgreany	Wexford County Council	27.44	River Type 14	52.7617381	-6.240382			Q3-4	2	1		09/09/2010	2010										Few				Few			Few				Few
11	IE_SE_11C010100	CLONOUGH_010	CLONOUGH	RS11C010050	CLONOUGH - Br SW of Coolgreany	Wexford County Council	27.44	River Type 14	52.7617381	-6.240382			Q4	3	2		02/08/2013	2013																					Numerous
11	IE_SE_11C010100	CLONOUGH_010	CLONOUGH	RS11C010050	CLONOUGH - Br SW of Coolgreany	Wexford County Council	27.44	River Type 14	52.7617381	-6.240382	Riffle Glide Pool	No	Q4	4			30/08/2017	2017										Few							Few				Few
11	IE_SE_11C010100	CLONOUGH_010	CLONOUGH	RS11C010100	Br ENE of St Austin's Ho	Wexford County Council	27.44	River Type 14	52.7560004	-6.2222639			Q3	1			19/06/2007	2007														Few								Few
11	IE_SE_11C010100	CLONOUGH_010	CLONOUGH	RS11C010100	Br ENE of St Austin's Ho	Wexford County Council	27.44	River Type 14	52.7560004	-6.2222639			Q3	3	1		02/08/2013	2013														Few			Few				Few
11	IE_SE_11C010100	CLONOUGH_010	CLONOUGH	RS11C010100	Br ENE of St Austin's Ho	Wexford County Council	27.44	River Type 14	52.7560004	-6.2222639	Riffle Glide Pool		Q3-4	2	2		30/08/2017	2017										Few				Few			Few				Few
11	IE_SE_11I010200	INCH (WEXFORD)_020	CLONOUGH	RS11C010300	Clonough Br	Wexford County Council	5.51	River Type 12	52.7395933	-6.2068818			Q3	2			19/06/2007	2007							Few			Few							Few					Common
11	IE_SE_11I010200	INCH (WEXFORD)_020	CLONOUGH	RS11C010300	Clonough Br	Wexford County Council	5.51	River Type 12	52.7395933	-6.2068818			Q3-4	2	2		11/09/2010	2010		Few					Few							Few
11	IE_SE_11I010200	INCH (WEXFORD)_020	CLONOUGH	RS11C010300	Clonough Br	Wexford County Council	5.51	River Type 12	52.7395933	-6.2068818			Q3-4	3	1		02/08/2013	2013															Few						Common
11	IE_SE_11I010200	INCH (WEXFORD)_020	CLONOUGH	RS11C010300	Clonough Br	Wexford County Council	5.51	River Type 12	52.7395933	-6.2068818	Riffle Glide Pool		Q3-4				30/08/2017	2017														Few							Common
11	IE_SE_11G010040	GORTEEN UPPER STREAM_010	GORTEEN UPPER STREAM	RS11G010040	Br u/s W Branch confl	Wexford County Council	36.58	River Type 14	52.739831	-6.2583152			Q4	2			19/06/2007	2007														Few			Few					Few
11	IE_SE_11G010040	GORTEEN UPPER STREAM_010	GORTEEN UPPER STREAM	RS11G010040	Br u/s W Branch confl	Wexford County Council	36.58	River Type 14	52.739831	-6.2583152			Q4	2	1		09/09/2010	2010														Few			Few				Few
11	IE_SE_11G010040	GORTEEN UPPER STREAM_010	GORTEEN UPPER STREAM	RS11G010040	Br u/s W Branch confl	Wexford County Council	36.58	River Type 14	52.739831	-6.2583152			Q3-4	3	1		02/08/2013	2013														Few			Few				Common
11	IE_SE_11G010040	GORTEEN UPPER STREAM_010	GORTEEN UPPER STREAM	RS11G010040	Br u/s W Branch confl	Wexford County Council	36.58	River Type 14	52.739831	-6.2583152	Riffle Glide Pool		Q3-4	2			31/08/2017	2017																	Few				Few
11	IE_SE_11I010130	INCH (WEXFORD)_010	INCH (WEXFORD)	RS11I010095	INCH (WEXFORD) - Br in Inch	Wexford County Council	14.3	River Type 13	52.7399037	-6.2382246			Q4	2	1		09/09/2010	2010														Few			Common				Common
11	IE_SE_11I010130	INCH (WEXFORD)_010	INCH (WEXFORD)	RS11I010095	INCH (WEXFORD) - Br in Inch	Wexford County Council	14.3	River Type 13	52.7399037	-6.2382246			Q3-4	3	1		02/08/2013	2013										Single											Dominant
11	IE_SE_11I010130	INCH (WEXFORD)_010	INCH (WEXFORD)	RS11I010095	INCH (WEXFORD) - Br in Inch	Wexford County Council	14.3	River Type 13	52.7399037	-6.2382246	Riffle Glide Pool		Q3-4	4	2		01/09/2017	2017									Single	Few				Few			Few				Few
11	IE_SE_11I010130	INCH (WEXFORD)_010	INCH (WEXFORD)	RS11I010130	Br 1.5 km d/s Inch Village	Wexford County Council	14.3	River Type 13	52.7363625	-6.2199471			Q4	2			19/06/2007	2007																	Few					Common
11	IE_SE_11I010130	INCH (WEXFORD)_010	INCH (WEXFORD)	RS11I010130	Br 1.5 km d/s Inch Village	Wexford County Council	14.3	River Type 13	52.7363625	-6.2199471			Q3-4	4	1		02/08/2013	2013														Few							Common
11	IE_SE_11I010130	INCH (WEXFORD)_010	INCH (WEXFORD)	RS11I010130	Br 1.5 km d/s Inch Village	Wexford County Council	14.3	River Type 13	52.7363625	-6.2199471	Riffle Glide Pool		Q3-4	2	5		01/09/2017	2017							Single										Single				Few
11	IE_SE_11I010200	INCH (WEXFORD)_020	INCH (WEXFORD)	RS11I010200	Castletown Br	Wexford County Council	5.51	River Type 12	52.7221047	-6.1985187			Q3-4	1			19/06/2007	2007							Few			Few							Few					Common
11	IE_SE_11I010200	INCH (WEXFORD)_020	INCH (WEXFORD)	RS11I010200	Castletown Br	Wexford County Council	5.51	River Type 12	52.7221047	-6.1985187			Q3-4	1.5	1		09/09/2010	2010																					Dominant
11	IE_SE_11I010200	INCH (WEXFORD)_020	INCH (WEXFORD)	RS11I010200	Castletown Br	Wexford County Council	5.51	River Type 12	52.7221047	-6.1985187			Q3-4	5	1		02/08/2013	2013										Few					Few						Common
11	IE_SE_11I010200	INCH (WEXFORD)_020	INCH (WEXFORD)	RS11I010200	Castletown Br	Wexford County Council	5.51	River Type 12	52.7221047	-6.1985187	Riffle Glide Pool		Q3-4	4			01/09/2017	2017										Few				Few			Few				Few
11	IE_SE_11O010080	OWENAVORRAGH_010	OWENAVORRAGH	RS11O010080	Ballynahown Br	Wexford County Council	47.02	River Type 12	52.5154656	-6.3368509			Q3-4	2.5			25/06/2007	2007							Few			Few							Few					Dominant
11	IE_SE_11O010080	OWENAVORRAGH_010	OWENAVORRAGH	RS11O010080	Ballynahown Br	Wexford County Council	47.02	River Type 12	52.5154656	-6.3368509			Q4	1.5	2		13/09/2010	2010								Few								Few					Common
11	IE_SE_11O010080	OWENAVORRAGH_010	OWENAVORRAGH	RS11O010080	Ballynahown Br	Wexford County Council	47.02	River Type 12	52.5154656	-6.3368509			Q4	4	1		21/09/2013	2013														Single	Few						Numerous
11	IE_SE_11O010080	OWENAVORRAGH_010	OWENAVORRAGH	RS11O010080	Ballynahown Br	Wexford County Council	47.02	River Type 12	52.5154656	-6.3368509	Riffle Glide Pool		Q4	5	2		28/08/2017	2017										Few				Few			Few				Common
11	IE_SE_11O010300	OWENAVORRAGH_030	OWENAVORRAGH	RS11O010300	Br SW of Killenagh	Wexford County Council	31.34	River Type 12	52.5872056	-6.2858185			Q4	1			25/06/2007	2007																Few	Few					Dominant
11	IE_SE_11O010300	OWENAVORRAGH_030	OWENAVORRAGH	RS11O010300	Br SW of Killenagh	Wexford County Council	31.34	River Type 12	52.5872056	-6.2858185			Q3-4	3	2		13/09/2010	2010		Few					Few														Excessive
11	IE_SE_11O010300	OWENAVORRAGH_030	OWENAVORRAGH	RS11O010300	Br SW of Killenagh	Wexford County Council	31.34	River Type 12	52.5872056	-6.2858185			Q3	3	1		08/10/2013	2013							Few								Few						Numerous
11	IE_SE_11O010300	OWENAVORRAGH_030	OWENAVORRAGH	RS11O010300	Br SW of Killenagh	Wexford County Council	31.34	River Type 12	52.5872056	-6.2858185	Riffle Glide Pool		Q3-4	2	2		28/08/2017	2017																	Few				Common
11	IE_SE_11O010400	OWENAVORRAGH_040	OWENAVORRAGH	RS11O010400	Ballycanew Br	Wexford County Council	26.92	River Type 12	52.6065885	-6.298716			Q3-4	3			13/09/2007	2007		Few					Few			Few				Few								Dominant
11	IE_SE_11O010400	OWENAVORRAGH_040	OWENAVORRAGH	RS11O010400	Ballycanew Br	Wexford County Council	26.92	River Type 12	52.6065885	-6.298716			Q3-4	3	1		17/08/2013	2013																	Few				Dominant
11	IE_SE_11O010400	OWENAVORRAGH_040	OWENAVORRAGH	RS11O010400	Ballycanew Br	Wexford County Council	26.92	River Type 12	52.6065885	-6.298716	Riffle Glide Pool	No	Q3-4				28/08/2017	2017										Few				Few							Few
11	IE_SE_11O010500	OWENAVORRAGH_050	OWENAVORRAGH	RS11O010500	Br N of Ballinamona	Wexford County Council	22.22	River Type 11	52.626807	-6.3023178			Q3	2			25/06/2007	2007																Few	Common
11	IE_SE_11O010500	OWENAVORRAGH_050	OWENAVORRAGH	RS11O010500	Br N of Ballinamona	Wexford County Council	22.22	River Type 11	52.626807	-6.3023178			Q3-4	2	1		10/09/2010	2010		Common					Common			Few				Few							Excessive
11	IE_SE_11O010500	OWENAVORRAGH_050	OWENAVORRAGH	RS11O010500	Br N of Ballinamona	Wexford County Council	22.22	River Type 11	52.626807	-6.3023178			Q4	4	1		17/08/2013	2013														Few							Numerous
11	IE_SE_11O010500	OWENAVORRAGH_050	OWENAVORRAGH	RS11O010500	Br N of Ballinamona	Wexford County Council	22.22	River Type 11	52.626807	-6.3023178	Riffle Glide Pool	No	Q3-4	4	4		28/08/2017	2017							Few								Few						Few
11	IE_SE_11O010700	OWENAVORRAGH_060	OWENAVORRAGH	RS11O010580	OWENAVORRAGH - Br just u/s Banoge R confl	Wexford County Council	4.22	River Type 11	52.6439094	-6.2891941			Q4	2	1		10/09/2010	2010					Few					Few				Few							Dominant
11	IE_SE_11O010700	OWENAVORRAGH_060	OWENAVORRAGH	RS11O010580	OWENAVORRAGH - Br just u/s Banoge R confl	Wexford County Council	4.22	River Type 11	52.6439094	-6.2891941			Q4	3	1		17/08/2013	2013									Single						Single						Numerous
11	IE_SE_11O010700	OWENAVORRAGH_060	OWENAVORRAGH	RS11O010580	OWENAVORRAGH - Br just u/s Banoge R confl	Wexford County Council	4.22	River Type 11	52.6439094	-6.2891941	Riffle Glide Pool		Q4	2	5		29/08/2017	2017														Few			Few				Few
11	IE_SE_11O010700	OWENAVORRAGH_060	OWENAVORRAGH	RS11O010600	Boleany Br	Wexford County Council	4.22	River Type 11	52.6431255	-6.2710464			Q3-4	3			13/09/2007	2007		Few				Few	Few							Few	Few		Few					Common
11	IE_SE_11O010700	OWENAVORRAGH_060	OWENAVORRAGH	RS11O010600	Boleany Br	Wexford County Council	4.22	River Type 11	52.6431255	-6.2710464			Q4	3	1		17/08/2013	2013							Few							Single	Few						Numerous
11	IE_SE_11O010700	OWENAVORRAGH_060	OWENAVORRAGH	RS11O010600	Boleany Br	Wexford County Council	4.22	River Type 11	52.6431255	-6.2710464	Riffle Glide Pool		Q4	4	5		29/08/2017	2017														Few			Few				Common
11	IE_SE_11O010700	OWENAVORRAGH_060	OWENAVORRAGH	RS11O010700	Ballinatray Br	Wexford County Council	4.22	River Type 11	52.648378	-6.2404817			Q3	2			26/06/2007	2007		Few															Few					Common
11	IE_SE_11O010700	OWENAVORRAGH_060	OWENAVORRAGH	RS11O010700	Ballinatray Br	Wexford County Council	4.22	River Type 11	52.648378	-6.2404817			Q4	3	1		10/09/2010	2010							Few							Few							Few
11	IE_SE_11O010700	OWENAVORRAGH_060	OWENAVORRAGH	RS11O010700	Ballinatray Br	Wexford County Council	4.22	River Type 11	52.648378	-6.2404817			Q4	3	1		17/08/2013	2013															Single						Common
11	IE_SE_11O010700	OWENAVORRAGH_060	OWENAVORRAGH	RS11O010700	Ballinatray Br	Wexford County Council	4.22	River Type 11	52.648378	-6.2404817	Riffle Glide Pool		Q4	2	10		29/08/2017	2017														Single			Few				Few
12	IE_SE_12A020300	ASSALY_010	ASSALY1	RS12A020200	Br. N of Walshestown (d/s Johnstown Castle)	Wexford County Council	6.63	River Type 32	52.2649588	-6.4767915			Q4	2			26/09/2007	2007														Few			Few					Common
12	IE_SE_12A020300	ASSALY_010	ASSALY1	RS12A020200	Br. N of Walshestown (d/s Johnstown Castle)	Wexford County Council	6.63	River Type 32	52.2649588	-6.4767915			Q4	3	1		08/08/2013	2013														Few							Numerous
12	IE_SE_12A020300	ASSALY_010	ASSALY1	RS12A020200	Br. N of Walshestown (d/s Johnstown Castle)	Wexford County Council	6.63	River Type 32	52.2649588	-6.4767915	Riffle Glide Pool		Q4	2	1		11/07/2016	2016		Few												Few	Few						Numerous
12	IE_SE_12A020300	ASSALY_010	ASSALY1	RS12A020300	ASSALY1 - Assaly Br	Wexford County Council	6.63	River Type 32	52.2620334	-6.4599283			Q3-4	2			14/06/2007	2007		Few					Few															Numerous
12	IE_SE_12A020300	ASSALY_010	ASSALY1	RS12A020300	ASSALY1 - Assaly Br	Wexford County Council	6.63	River Type 32	52.2620334	-6.4599283			Q3	4			18/08/2013	2013							Single							Few			Numerous
12	IE_SE_12A020300	ASSALY_010	ASSALY1	RS12A020300	ASSALY1 - Assaly Br	Wexford County Council	6.63	River Type 32	52.2620334	-6.4599283	Lowland Meandering	No	Q3	2	1	2	11/07/2016	2016																	Few				Single
12	IE_SE_12A030200	ASKINVILLAR STREAM_010	ASKINVILLAR STREAM	RS12A030200	Askinvillar Br	Wexford County Council	98.56	River Type 14	52.5571828	-6.7473832			Q4-5	2			12/06/2007	2007																	Few					Few
12	IE_SE_12A030200	ASKINVILLAR STREAM_010	ASKINVILLAR STREAM	RS12A030200	Askinvillar Br	Wexford County Council	98.56	River Type 14	52.5571828	-6.7473832			Q4-5	2	1		02/09/2010	2010																	Common				Few
12	IE_SE_12A030200	ASKINVILLAR STREAM_010	ASKINVILLAR STREAM	RS12A030200	Askinvillar Br	Wexford County Council	98.56	River Type 14	52.5571828	-6.7473832			Q4	3	1		16/07/2013	2013																					Common
12	IE_SE_12A030200	ASKINVILLAR STREAM_010	ASKINVILLAR STREAM	RS12A030200	Askinvillar Br	Wexford County Council	98.56	River Type 14	52.5571828	-6.7473832	Riffle Glide Pool	No	Q4-5	6	3		10/07/2016	2016																					Few
12	IE_SE_12A030200	ASKINVILLAR STREAM_010	ASKINVILLAR STREAM	RS12A030200	Askinvillar Br	Wexford County Council	98.56	River Type 14	52.5571828	-6.7473832	Riffle Glide Pool	No	Q4-5	5	9		02/08/2018	2018														Few			Few				Few
12	IE_SE_12B010100	BANN_010	BANN	RS12B010100	Pallis Br	Wexford County Council	152.01	River Type 13	52.7533939	-6.3471316			Q4-5	2			06/06/2007	2007																Few	Numerous					Few
12	IE_SE_12B010100	BANN_010	BANN	RS12B010100	Pallis Br	Wexford County Council	152.01	River Type 13	52.7533939	-6.3471316			Q4-5	2	1		26/08/2010	2010																	Few				Few
12	IE_SE_12B010100	BANN_010	BANN	RS12B010100	Pallis Br	Wexford County Council	152.01	River Type 13	52.7533939	-6.3471316			Q4-5	3	1		03/08/2013	2013										Few							Few				Few
12	IE_SE_12B010100	BANN_010	BANN	RS12B010100	Pallis Br	Wexford County Council	152.01	River Type 13	52.7533939	-6.3471316	Riffle Glide Pool	No	Q3-4	5	2		25/08/2016	2016											Single						Common				Common
12	IE_SE_12B010200	BANN_020	BANN	RS12B010200	Br at Hollyfort	Wexford County Council	90.22	River Type 13	52.7168292	-6.3396982			Q4-5	2			06/06/2007	2007										Few				Few			Common
12	IE_SE_12B010200	BANN_020	BANN	RS12B010200	Br at Hollyfort	Wexford County Council	90.22	River Type 13	52.7168292	-6.3396982			Q4-5	2	1		26/08/2010	2010																	Few				Few
12	IE_SE_12B010200	BANN_020	BANN	RS12B010200	Br at Hollyfort	Wexford County Council	90.22	River Type 13	52.7168292	-6.3396982			Q4-5	3	1		03/08/2013	2013										Few							Few
12	IE_SE_12B010200	BANN_020	BANN	RS12B010200	Br at Hollyfort	Wexford County Council	90.22	River Type 13	52.7168292	-6.3396982	Riffle Glide Pool	No	Q4	5	2		25/08/2016	2016										Single				Few			Common				Common
12	IE_SE_12B010400	BANN_030	BANN	RS12B010300	Kilmichael Br	Wexford County Council	62.89	River Type 12	52.6970645	-6.3442307			Q4	3			14/09/2007	2007														Common	Few		Few
12	IE_SE_12B010400	BANN_030	BANN	RS12B010400	Margerry's Br	Wexford County Council	62.89	River Type 12	52.6739014	-6.3520012			Q4-5	2			06/06/2007	2007		Single															Few					Few
12	IE_SE_12B010400	BANN_030	BANN	RS12B010400	Margerry's Br	Wexford County Council	62.89	River Type 12	52.6739014	-6.3520012			Q4-5	2	1		26/08/2010	2010										Few											Few
12	IE_SE_12B010400	BANN_030	BANN	RS12B010400	Margerry's Br	Wexford County Council	62.89	River Type 12	52.6739014	-6.3520012			Q4-5	3	1		03/08/2013	2013																					Common
12	IE_SE_12B010400	BANN_030	BANN	RS12B010400	Margerry's Br	Wexford County Council	62.89	River Type 12	52.6739014	-6.3520012	Riffle Glide Pool	No	Q4	5	2		25/08/2016	2016																					Few
12	IE_SE_12B010450	BANN_040	BANN	RS12B010450	Island Br	Wexford County Council	51.19	River Type 12	52.659061	-6.3820632			Q4-5	2			06/06/2007	2007										Few							Few					Few
12	IE_SE_12B010450	BANN_040	BANN	RS12B010450	Island Br	Wexford County Council	51.19	River Type 12	52.659061	-6.3820632			Q4-5	2	1		26/08/2010	2010										Few							Few
12	IE_SE_12B010450	BANN_040	BANN	RS12B010450	Island Br	Wexford County Council	51.19	River Type 12	52.659061	-6.3820632			Q4-5	4	1		03/08/2013	2013															Single						Numerous
12	IE_SE_12B010450	BANN_040	BANN	RS12B010450	Island Br	Wexford County Council	51.19	River Type 12	52.659061	-6.3820632	Riffle Glide Pool	No	Q4	5	2		25/08/2016	2016											Few										Common
12	IE_SE_12B010600	BANN_050	BANN	RS12B010500	Ballydaniel Br	Wexford County Council	30.31	River Type 12	52.6192292	-6.4135564			Q4	3			14/09/2007	2007														Few	Few		Few					Common
12	IE_SE_12B010600	BANN_050	BANN	RS12B010600	Milshoge Br	Wexford County Council	30.31	River Type 12	52.6110092	-6.4293965			Q4	2			06/06/2007	2007										Few							Common					Few
12	IE_SE_12B010600	BANN_050	BANN	RS12B010600	Milshoge Br	Wexford County Council	30.31	River Type 12	52.6110092	-6.4293965			Q4	2	1		26/08/2010	2010										Few				Few			Few				Common
12	IE_SE_12B010600	BANN_050	BANN	RS12B010600	Milshoge Br	Wexford County Council	30.31	River Type 12	52.6110092	-6.4293965			Q4	3	1		03/08/2013	2013										Few					Few		Few				Numerous
12	IE_SE_12B010600	BANN_050	BANN	RS12B010600	Milshoge Br	Wexford County Council	30.31	River Type 12	52.6110092	-6.4293965	Riffle Glide Pool		Q4	4	1		10/08/2016	2016										Single					Single		Few				Common
12	IE_SE_12B010900	BANN_060	BANN	RS12B010800	Milltown Br	Wexford County Council	19.51	River Type 12	52.5860199	-6.47737			Q3-4	3			14/09/2007	2007		Few					Few							Common	Few		Few					Common
12	IE_SE_12B010900	BANN_060	BANN	RS12B010800	Milltown Br	Wexford County Council	19.51	River Type 12	52.5860199	-6.47737			Q3	2	1		27/08/2010	2010																					Few
12	IE_SE_12B010900	BANN_060	BANN	RS12B010800	Milltown Br	Wexford County Council	19.51	River Type 12	52.5860199	-6.47737			Q4	3	1		03/08/2013	2013										Single				Single	Few						Numerous
12	IE_SE_12B010900	BANN_060	BANN	RS12B010800	Milltown Br	Wexford County Council	19.51	River Type 12	52.5860199	-6.47737	Riffle Glide Pool		Q4	4	1		10/08/2016	2016										Single				Few	Single		Single				Common
12	IE_SE_12B010900	BANN_060	BANN	RS12B010900	Doran's Br	Wexford County Council	19.51	River Type 12	52.5781341	-6.492061			Q4-5	2			11/06/2007	2007																Few	Numerous					Common
12	IE_SE_12B010900	BANN_060	BANN	RS12B010900	Doran's Br	Wexford County Council	19.51	River Type 12	52.5781341	-6.492061			Q3-4	2	1		27/08/2010	2010																					Common
12	IE_SE_12B010900	BANN_060	BANN	RS12B010900	Doran's Br	Wexford County Council	19.51	River Type 12	52.5781341	-6.492061			Q4	3	1		03/08/2013	2013														Few							Numerous
12	IE_SE_12B010900	BANN_060	BANN	RS12B010900	Doran's Br	Wexford County Council	19.51	River Type 12	52.5781341	-6.492061	Riffle Glide Pool		Q3-4	4	2		10/08/2016	2016															Few						Common
12	IE_SE_12B011000	BANN_070	BANN	RS12B011000	Bann Br	Wexford County Council	10.03	River Type 12	52.5459204	-6.5436856			Q4	2			11/06/2007	2007																	Common					Few
12	IE_SE_12B011000	BANN_070	BANN	RS12B011000	Bann Br	Wexford County Council	10.03	River Type 12	52.5459204	-6.5436856			Q4	2	1		25/08/2010	2010										Few				Few			Few				Few
12	IE_SE_12B011000	BANN_070	BANN	RS12B011000	Bann Br	Wexford County Council	10.03	River Type 12	52.5459204	-6.5436856			Q3-4	3	1		04/08/2013	2013														Few		Single					Numerous
12	IE_SE_12B011000	BANN_070	BANN	RS12B011000	Bann Br	Wexford County Council	10.03	River Type 12	52.5459204	-6.5436856	Intermediate	No	Q3-4	3	1		09/08/2016	2016														Few			Few				Few
12	IE_SE_12B020040	BORO_010	BORO	RS12B020010	Corragean (Abstr Point)	Wexford County Council	85.29	River Type 14	52.5193942	-6.8083974			Q4	2			27/09/2007	2007														Few			Common
12	IE_SE_12B020040	BORO_010	BORO	RS12B020012	SW of Slievebaun - (Abstr Point)	Wexford County Council	85.29	River Type 14	52.5170282	-6.8037321			Q4	2			27/09/2007	2007										Few							Common					Single
12	IE_SE_12B020040	BORO_010	BORO	RS12B020040	Tomanine Br	Wexford County Council	85.29	River Type 14	52.4927954	-6.778177			Q4	2			12/06/2007	2007		Few															Few					Common
12	IE_SE_12B020040	BORO_010	BORO	RS12B020040	Tomanine Br	Wexford County Council	85.29	River Type 14	52.4927954	-6.778177			Q3-4	2	1		02/09/2010	2010		Few															Few
12	IE_SE_12B020040	BORO_010	BORO	RS12B020040	Tomanine Br	Wexford County Council	85.29	River Type 14	52.4927954	-6.778177			Q4	3	1		16/07/2013	2013													Few								Common
12	IE_SE_12B020040	BORO_010	BORO	RS12B020040	Tomanine Br	Wexford County Council	85.29	River Type 14	52.4927954	-6.778177	Riffle Glide Pool	No	Q4	4	1		11/07/2016	2016																					Common
12	IE_SE_12B020080	BORO_020	BORO	RS12B020080	Boro Bridge	Wexford County Council	55.64	River Type 12	52.4836355	-6.7245244			Q3-4	2	1		02/09/2010	2010																	Few				Few
12	IE_SE_12B020080	BORO_020	BORO	RS12B020080	Boro Bridge	Wexford County Council	55.64	River Type 12	52.4836355	-6.7245244			Q4	3	1		16/07/2013	2013														Few	Single						Common
12	IE_SE_12B020080	BORO_020	BORO	RS12B020080	Boro Bridge	Wexford County Council	55.64	River Type 12	52.4836355	-6.7245244	Riffle Glide Pool		Q4	3	1		11/07/2016	2016															Few						Common
12	IE_SE_12B020200	BORO_030	BORO	RS12B020200	Ballymackesy Br	Wexford County Council	42.54	River Type 12	52.4607499	-6.6898219			Q4	2			13/06/2007	2007										Few							Few					Common
12	IE_SE_12B020200	BORO_030	BORO	RS12B020200	Ballymackesy Br	Wexford County Council	42.54	River Type 12	52.4607499	-6.6898219			Q4	2.5	1		03/09/2010	2010																	Few				Common
12	IE_SE_12B020340	BORO_040	BORO	RS12B020340	2nd Br d/s Ballyeden Br	Wexford County Council	31.03	River Type 12	52.4389137	-6.6530492			Q4	3			13/06/2007	2007																Few	Numerous					Common
12	IE_SE_12B020340	BORO_040	BORO	RS12B020340	2nd Br d/s Ballyeden Br	Wexford County Council	31.03	River Type 12	52.4389137	-6.6530492			Q4	2.5	1		03/09/2010	2010														Few			Few				Few
12	IE_SE_12B020340	BORO_040	BORO	RS12B020340	2nd Br d/s Ballyeden Br	Wexford County Council	31.03	River Type 12	52.4389137	-6.6530492			Q4	3	1		18/07/2013	2013										Few					Few		Few				Common
12	IE_SE_12B020340	BORO_040	BORO	RS12B020340	2nd Br d/s Ballyeden Br	Wexford County Council	31.03	River Type 12	52.4389137	-6.6530492	Riffle Glide Pool	No	Q4	4	2		10/07/2016	2016											Common		Single								Numerous
12	IE_SE_12B020400	BORO_050	BORO	RS12B020400	BORO - Br NW of Wilton Castle	Wexford County Council	17.2	River Type 11	52.4620992	-6.6138248			Q4	2	1		03/09/2010	2010										Few				Few							Common
12	IE_SE_12B020400	BORO_050	BORO	RS12B020400	BORO - Br NW of Wilton Castle	Wexford County Council	17.2	River Type 11	52.4620992	-6.6138248			Q4	3	1		16/07/2013	2013																					Common
12	IE_SE_12B020400	BORO_050	BORO	RS12B020400	BORO - Br NW of Wilton Castle	Wexford County Council	17.2	River Type 11	52.4620992	-6.6138248	Riffle Glide Pool	No	Q4	3	1		10/07/2016	2016											Single				Few
12	IE_SE_12B020600	BORO_060	BORO	RS12B020500	Ballynapierce Br	Wexford County Council	4.9	River Type 12	52.4715142	-6.590728			Q4	2			13/06/2007	2007		Few								Few							Few					Few
12	IE_SE_12B020600	BORO_060	BORO	RS12B020500	Ballynapierce Br	Wexford County Council	4.9	River Type 12	52.4715142	-6.590728			Q3-4	3	1		16/07/2013	2013																	Single				Common
12	IE_SE_12B020600	BORO_060	BORO	RS12B020500	Ballynapierce Br	Wexford County Council	4.9	River Type 12	52.4715142	-6.590728	Riffle Glide Pool	No	Q4	4	2		10/07/2016	2016																	Few				Numerous
12	IE_SE_12B020600	BORO_060	BORO	RS12B020600	Kilcarbry Bridge	Wexford County Council	4.9	River Type 12	52.4703862	-6.5723578			Q4	2	1		03/09/2010	2010																					Few
12	IE_SE_12B020600	BORO_060	BORO	RS12B020600	Kilcarbry Bridge	Wexford County Council	4.9	River Type 12	52.4703862	-6.5723578			Q4	3	1		16/07/2013	2013		Few												Few							Numerous
12	IE_SE_12B020600	BORO_060	BORO	RS12B020600	Kilcarbry Bridge	Wexford County Council	4.9	River Type 12	52.4703862	-6.5723578	Riffle Glide Pool		Q4	2	1		10/07/2016	2016		Few									Single										Few
12	IE_SE_12B030230	BROWN'S BECK BROOK_010	BROWN'S BECK BROOK	RS12B030100	BROWN'S BECK BROOK - Hell Kettle Br	Wicklow County Council	166.78	River Type 13	53.0293952	-6.6099272			Q4	2	1		11/08/2010	2010																	Common				Few
12	IE_SE_12B030230	BROWN'S BECK BROOK_010	BROWN'S BECK BROOK	RS12B030100	BROWN'S BECK BROOK - Hell Kettle Br	Wicklow County Council	166.78	River Type 13	53.0293952	-6.6099272			Q4-5	4	1		09/10/2013	2013										Few
12	IE_SE_12B030230	BROWN'S BECK BROOK_010	BROWN'S BECK BROOK	RS12B030100	BROWN'S BECK BROOK - Hell Kettle Br	Wicklow County Council	166.78	River Type 13	53.0293952	-6.6099272	Riffle Glide Pool	No	Q3	6	2		29/08/2016	2016										Few				Few	Few
12	IE_SE_12B030230	BROWN'S BECK BROOK_010	BROWN'S BECK BROOK	RS12B030200	Br WNW of Donard	Wicklow County Council	166.78	River Type 13	53.0224666	-6.6186998			Q4	2			16/05/2007	2007										Few							Few
12	IE_SE_12B030230	BROWN'S BECK BROOK_010	BROWN'S BECK BROOK	RS12B030200	Br WNW of Donard	Wicklow County Council	166.78	River Type 13	53.0224666	-6.6186998			Q3-4	2	1		11/08/2010	2010										Few				Few			Few				Few
12	IE_SE_12B030230	BROWN'S BECK BROOK_010	BROWN'S BECK BROOK	RS12B030200	Br WNW of Donard	Wicklow County Council	166.78	River Type 13	53.0224666	-6.6186998			Q4	4	1		09/10/2013	2013							Single			Few				Few
12	IE_SE_12B030230	BROWN'S BECK BROOK_010	BROWN'S BECK BROOK	RS12B030200	Br WNW of Donard	Wicklow County Council	166.78	River Type 13	53.0224666	-6.6186998	Riffle Glide Pool	No	Q3	4	2		29/08/2016	2016										Few				Few
12	IE_SE_12B040250	BLACKLION STREAM (CARLOW)_010	BLACKLION STREAM (CARLOW)	RS12B040200	Br at Blacklion	Carlow County Council	84.88	River Type 12	52.7512621	-6.6671611			Q3-4	1			21/05/2007	2007										Few				Few								Common
12	IE_SE_12B040250	BLACKLION STREAM (CARLOW)_010	BLACKLION STREAM (CARLOW)	RS12B040200	Br at Blacklion	Carlow County Council	84.88	River Type 12	52.7512621	-6.6671611			Q4	2	1		17/08/2010	2010										Few							Few				Common
12	IE_SE_12B040250	BLACKLION STREAM (CARLOW)_010	BLACKLION STREAM (CARLOW)	RS12B040200	Br at Blacklion	Carlow County Council	84.88	River Type 12	52.7512621	-6.6671611			Q3-4	3	1		17/09/2013	2013										Few					Few						Numerous
12	IE_SE_12B040250	BLACKLION STREAM (CARLOW)_010	BLACKLION STREAM (CARLOW)	RS12B040200	Br at Blacklion	Carlow County Council	84.88	River Type 12	52.7512621	-6.6671611	Riffle Glide Pool	No	Q3-4	3	1		26/08/2016	2016														Few	Few						Common
12	IE_SE_12B040400	BLACKLION STREAM (CARLOW)_020	BLACKLION STREAM (CARLOW)	RS12B040400	Br u/s Derreen R confl	Wicklow County Council	74.12	River Type 12	52.776241	-6.708483			Q4	2			21/05/2007	2007		Few															Few					Few
12	IE_SE_12B040400	BLACKLION STREAM (CARLOW)_020	BLACKLION STREAM (CARLOW)	RS12B040400	Br u/s Derreen R confl	Wicklow County Council	74.12	River Type 12	52.776241	-6.708483			Q3-4	2	1		17/08/2010	2010														Few			Common
12	IE_SE_12B040400	BLACKLION STREAM (CARLOW)_020	BLACKLION STREAM (CARLOW)	RS12B040400	Br u/s Derreen R confl	Wicklow County Council	74.12	River Type 12	52.776241	-6.708483			Q3	4			01/08/2013	2013		Few													Common						Few
12	IE_SE_12B040400	BLACKLION STREAM (CARLOW)_020	BLACKLION STREAM (CARLOW)	RS12B040400	Br u/s Derreen R confl	Wicklow County Council	74.12	River Type 12	52.776241	-6.708483	Lowland Meandering		Q3-4	2			26/08/2016	2016															Common						Few
12	IE_SE_12B050300	BORRIS STREAM (SLANEY)_010	BORRIS STREAM (SLANEY)	RS12B050300	Br u/s Slaney R confl	Wexford County Council	27.87	River Type 13	52.6244751	-6.6045639			Q4	1			07/06/2007	2007										Few							Few					Few
12	IE_SE_12B050300	BORRIS STREAM (SLANEY)_010	BORRIS STREAM (SLANEY)	RS12B050300	Br u/s Slaney R confl	Wexford County Council	27.87	River Type 13	52.6244751	-6.6045639			Q4	2	1		25/08/2010	2010																					Few
12	IE_SE_12B050300	BORRIS STREAM (SLANEY)_010	BORRIS STREAM (SLANEY)	RS12B050300	Br u/s Slaney R confl	Wexford County Council	27.87	River Type 13	52.6244751	-6.6045639			Q4	4	1		03/08/2013	2013															Few						Numerous
12	IE_SE_12B050300	BORRIS STREAM (SLANEY)_010	BORRIS STREAM (SLANEY)	RS12B050300	Br u/s Slaney R confl	Wexford County Council	27.87	River Type 13	52.6244751	-6.6045639	Riffle Glide Pool	No	Q3-4	4	2		10/08/2016	2016										Few					Few						Numerous
12	IE_SE_12B060500	BALLINGALE STREAM_010	BALLINGALE STREAM	RS12B060300	Ballycadden Br	Wexford County Council	51.83	River Type 12	52.6495272	-6.5458784			Q4	2			07/06/2007	2007										Few						Few	Few					Few
12	IE_SE_12B060500	BALLINGALE STREAM_010	BALLINGALE STREAM	RS12B060300	Ballycadden Br	Wexford County Council	51.83	River Type 12	52.6495272	-6.5458784			Q3-4	2	1		25/08/2010	2010										Few							Few				Single
12	IE_SE_12B060500	BALLINGALE STREAM_010	BALLINGALE STREAM	RS12B060300	Ballycadden Br	Wexford County Council	51.83	River Type 12	52.6495272	-6.5458784			Q3	3	1		03/08/2013	2013														Common							Common
12	IE_SE_12B060500	BALLINGALE STREAM_010	BALLINGALE STREAM	RS12B060300	Ballycadden Br	Wexford County Council	51.83	River Type 12	52.6495272	-6.5458784	Riffle Glide Pool	No	Q3	4	2		10/08/2016	2016													Single		Few		Few				Dominant
12	IE_SE_12B060900	BALLINGALE STREAM_020	BALLINGALE STREAM	RS12B060600	BALLINGALE STREAM - Br SW of Ballaman	Wexford County Council	17.84	River Type 12	52.6192486	-6.5576422			Q4	1.5			25/08/2010	2010										Few							Few				Few
12	IE_SE_12B060900	BALLINGALE STREAM_020	BALLINGALE STREAM	RS12B060600	BALLINGALE STREAM - Br SW of Ballaman	Wexford County Council	17.84	River Type 12	52.6192486	-6.5576422			Q4	3	1		03/08/2013	2013										Few							Few				Common
12	IE_SE_12B060900	BALLINGALE STREAM_020	BALLINGALE STREAM	RS12B060600	BALLINGALE STREAM - Br SW of Ballaman	Wexford County Council	17.84	River Type 12	52.6192486	-6.5576422	Riffle Glide Pool		Q3-4	3	2		10/08/2016	2016										Single					Few						Dominant
12	IE_SE_12B060900	BALLINGALE STREAM_020	BALLINGALE STREAM	RS12B060900	Br u/s Slaney R confl	Wexford County Council	17.84	River Type 12	52.5910476	-6.5720528			Q3	2			07/06/2007	2007										Few						Few	Few
12	IE_SE_12B060900	BALLINGALE STREAM_020	BALLINGALE STREAM	RS12B060900	Br u/s Slaney R confl	Wexford County Council	17.84	River Type 12	52.5910476	-6.5720528			Q4	2	1		25/08/2010	2010							Few			Few											Few
12	IE_SE_12B060900	BALLINGALE STREAM_020	BALLINGALE STREAM	RS12B060900	Br u/s Slaney R confl	Wexford County Council	17.84	River Type 12	52.5910476	-6.5720528			Q4	3	1		03/08/2013	2013																Single					Numerous
12	IE_SE_12B060900	BALLINGALE STREAM_020	BALLINGALE STREAM	RS12B060900	Br u/s Slaney R confl	Wexford County Council	17.84	River Type 12	52.5910476	-6.5720528	Riffle Glide Pool		Q4	5	2		10/08/2016	2016										Few					Few						Common
12	IE_SE_12B070400	BALLYCARNEY STREAM_010	BALLYCARNEY STREAM	RS12B070400	BALLYCARNEY STREAM - Br d/s Tinnashrule Br	Wexford County Council	51.8	River Type 12	52.6126522	-6.5253016			Q3-4	1			25/08/2010	2010										Few				Few			Few				Few
12	IE_SE_12B070400	BALLYCARNEY STREAM_010	BALLYCARNEY STREAM	RS12B070400	BALLYCARNEY STREAM - Br d/s Tinnashrule Br	Wexford County Council	51.8	River Type 12	52.6126522	-6.5253016			Q3-4	3	1		03/08/2013	2013										Single											Common
12	IE_SE_12B070400	BALLYCARNEY STREAM_010	BALLYCARNEY STREAM	RS12B070400	BALLYCARNEY STREAM - Br d/s Tinnashrule Br	Wexford County Council	51.8	River Type 12	52.6126522	-6.5253016			Q3-4	3	1		10/08/2016	2016																	Few				Few
12	IE_SE_12B070700	BALLYCARNEY STREAM_020	BALLYCARNEY STREAM	RS12B070700	Br u/s Slaney R confl	Wexford County Council	15.32	River Type 12	52.5833249	-6.5706348			Q4	2			08/06/2007	2007		Few														Few	Few					Common
12	IE_SE_12B070700	BALLYCARNEY STREAM_020	BALLYCARNEY STREAM	RS12B070700	Br u/s Slaney R confl	Wexford County Council	15.32	River Type 12	52.5833249	-6.5706348			Q4	2	1		25/08/2010	2010																Few	Few				Common
12	IE_SE_12B070700	BALLYCARNEY STREAM_020	BALLYCARNEY STREAM	RS12B070700	Br u/s Slaney R confl	Wexford County Council	15.32	River Type 12	52.5833249	-6.5706348			Q3-4	4	2		03/08/2013	2013															Few		Few				Common
12	IE_SE_12B070700	BALLYCARNEY STREAM_020	BALLYCARNEY STREAM	RS12B070700	Br u/s Slaney R confl	Wexford County Council	15.32	River Type 12	52.5833249	-6.5706348	Cascade Step Pool (CSP)	No	Q3	4	1		10/08/2016	2016										Few	Single										Common
12	IE_SE_12B080200	BLACKWATER STREAM (BANN)_010	BLACKWATER STREAM (BANN)	RS12B080200	BLACKWATER STREAM (BANN) - Blackwater Br	Wexford County Council	101.77	River Type 13	52.7232742	-6.3513231			Q4-5	2	1		26/08/2010	2010														Few			Few				Few
12	IE_SE_12B080200	BLACKWATER STREAM (BANN)_010	BLACKWATER STREAM (BANN)	RS12B080200	BLACKWATER STREAM (BANN) - Blackwater Br	Wexford County Council	101.77	River Type 13	52.7232742	-6.3513231			Q4-5	3	1		03/08/2013	2013										Single					Few		Few				Few
12	IE_SE_12B080200	BLACKWATER STREAM (BANN)_010	BLACKWATER STREAM (BANN)	RS12B080200	BLACKWATER STREAM (BANN) - Blackwater Br	Wexford County Council	101.77	River Type 13	52.7232742	-6.3513231	Riffle Glide Pool		Q3-4	4	2		25/08/2016	2016														Few	Common		Few				Numerous
12	IE_SE_12B120990	Ballaghmore Distributary_010	Ballaghmore Distributary	RS12B120990	Sandbrooke Br	Carlow County Council	65.07	River Type 12	52.7566472	-6.7536038			Q3	1			23/05/2007	2007		Few																				Common
12	IE_SE_12B120990	Ballaghmore Distributary_010	Ballaghmore Distributary	RS12B120990	Sandbrooke Br	Carlow County Council	65.07	River Type 12	52.7566472	-6.7536038			Q3-4	2			17/08/2010	2010										Few							Common				Dominant
12	IE_SE_12B120990	Ballaghmore Distributary_010	Ballaghmore Distributary	RS12B120990	Sandbrooke Br	Carlow County Council	65.07	River Type 12	52.7566472	-6.7536038			Q3				08/10/2013	2013									Single	Few					Few		Few				Dominant
12	IE_SE_12B120990	Ballaghmore Distributary_010	Ballaghmore Distributary	RS12B120990	Sandbrooke Br	Carlow County Council	65.07	River Type 12	52.7566472	-6.7536038	Riffle Glide Pool	No	Q3	3			26/08/2016	2016														Common			Few				Common
12	IE_SE_12B020340	BORO_040	CHAPEL STREAM	RS12C010100	Br u/s Boro R confl	Wexford County Council	31.03	River Type 12	52.4487715	-6.6923572			Q3	2			27/09/2007	2007		Few				Few				Few												Common
12	IE_SE_12B020340	BORO_040	CHAPEL STREAM	RS12C010100	Br u/s Boro R confl	Wexford County Council	31.03	River Type 12	52.4487715	-6.6923572			Q3	3	1		16/07/2013	2013											Common						Single				Numerous
12	IE_SE_12B020340	BORO_040	CHAPEL STREAM	RS12C010100	Br u/s Boro R confl	Wexford County Council	31.03	River Type 12	52.4487715	-6.6923572	Intermediate	No	Q3	2	1		10/07/2016	2016										Few			Few	Few							Numerous
12	IE_SE_12C030080	CLODY_010	CLODY	RS12C030080	Br d/s confl of N & S branches	Carlow County Council	125.83	River Type 14	52.6416197	-6.7300499			Q4-5	1			24/05/2007	2007																	Few
12	IE_SE_12C030080	CLODY_010	CLODY	RS12C030080	Br d/s confl of N & S branches	Carlow County Council	125.83	River Type 14	52.6416197	-6.7300499			Q4-5	2	1		24/08/2010	2010
12	IE_SE_12C030080	CLODY_010	CLODY	RS12C030080	Br d/s confl of N & S branches	Carlow County Council	125.83	River Type 14	52.6416197	-6.7300499			Q4-5	3	1		17/07/2013	2013															Single
12	IE_SE_12C030080	CLODY_010	CLODY	RS12C030080	Br d/s confl of N & S branches	Carlow County Council	125.83	River Type 14	52.6416197	-6.7300499	Riffle Glide Pool		Q4-5	4	2		09/08/2016	2016														Few			Few
12	IE_SE_12C030200	CLODY_020	CLODY	RS12C030100	Ford NE of Craan	Wexford County Council	62.59	River Type 14	52.6397043	-6.7189363			Q4	2			27/09/2007	2007														Few			Common
12	IE_SE_12C030200	CLODY_020	CLODY	RS12C030200	Ford (Br) 3km u/s Bunclody	Wexford County Council	62.59	River Type 14	52.6381262	-6.6759512			Q5	2			24/05/2007	2007																	Few
12	IE_SE_12C030200	CLODY_020	CLODY	RS12C030200	Ford (Br) 3km u/s Bunclody	Wexford County Council	62.59	River Type 14	52.6381262	-6.6759512			Q4-5	3	1		24/08/2010	2010																	Few				Few
12	IE_SE_12C030200	CLODY_020	CLODY	RS12C030200	Ford (Br) 3km u/s Bunclody	Wexford County Council	62.59	River Type 14	52.6381262	-6.6759512			Q4-5	3			17/07/2013	2013										Single					Single
12	IE_SE_12C030200	CLODY_020	CLODY	RS12C030200	Ford (Br) 3km u/s Bunclody	Wexford County Council	62.59	River Type 14	52.6381262	-6.6759512	Riffle Glide Pool	No	Q4-5	5	2		09/08/2016	2016																	Single
12	IE_SE_12S021800	SLANEY_120	CLODY	RS12C030300	CLODY - Clody Br Bunclody	Carlow County Council	29.29	River Type 14	52.6557768	-6.6552751			Q4	2	1		24/08/2010	2010																	Common				Few
12	IE_SE_12S021800	SLANEY_120	CLODY	RS12C030300	CLODY - Clody Br Bunclody	Carlow County Council	29.29	River Type 14	52.6557768	-6.6552751			Q4-5	3	1		17/07/2013	2013																	Single
12	IE_SE_12S021800	SLANEY_120	CLODY	RS12C030300	CLODY - Clody Br Bunclody	Carlow County Council	29.29	River Type 14	52.6557768	-6.6552751	Riffle Glide Pool	No	Q3-4	3	2		08/08/2016	2016																	Common				Few
12	IE_SE_12C040200	CORBALLY STREAM_010	CORBALLY STREAM	RS12C040200	CORBALLY STREAM - Kilcormick Br	Wexford County Council	61.03	River Type 12	52.5363816	-6.4184475			Q3-4	2			30/08/2010	2010										Few							Few				Numerous
12	IE_SE_12C040200	CORBALLY STREAM_010	CORBALLY STREAM	RS12C040200	CORBALLY STREAM - Kilcormick Br	Wexford County Council	61.03	River Type 12	52.5363816	-6.4184475			Q3	3	1		21/09/2013	2013						Few				Common					Common		Few				Numerous
12	IE_SE_12C040200	CORBALLY STREAM_010	CORBALLY STREAM	RS12C040200	CORBALLY STREAM - Kilcormick Br	Wexford County Council	61.03	River Type 12	52.5363816	-6.4184475	Riffle Glide Pool	No	Q3	3	1		09/08/2016	2016										Few					Common		Few				Common
12	IE_SE_12C040300	CORBALLY STREAM_020	CORBALLY STREAM	RS12C040300	Ballincash Br	Wexford County Council	50.33	River Type 12	52.5202873	-6.4413929			Q3-4	2			11/06/2007	2007																						Few
12	IE_SE_12C040300	CORBALLY STREAM_020	CORBALLY STREAM	RS12C040300	Ballincash Br	Wexford County Council	50.33	River Type 12	52.5202873	-6.4413929			Q4	2	1		30/08/2010	2010																					Common
12	IE_SE_12C040300	CORBALLY STREAM_020	CORBALLY STREAM	RS12C040300	Ballincash Br	Wexford County Council	50.33	River Type 12	52.5202873	-6.4413929			Q3-4	3			21/09/2013	2013															Few						Dominant
12	IE_SE_12C040300	CORBALLY STREAM_020	CORBALLY STREAM	RS12C040300	Ballincash Br	Wexford County Council	50.33	River Type 12	52.5202873	-6.4413929	Riffle Glide Pool	No	Q4	4	2		09/08/2016	2016														Single			Few				Few
12	IE_SE_12C040400	CORBALLY STREAM_030	CORBALLY STREAM	RS12C040400	CORBALLY STREAM - Ballymoty Br	Wexford County Council	44.92	River Type 12	52.5115265	-6.4619861			Q4	2	1		30/08/2010	2010																	Few				Few
12	IE_SE_12C040400	CORBALLY STREAM_030	CORBALLY STREAM	RS12C040400	CORBALLY STREAM - Ballymoty Br	Wexford County Council	44.92	River Type 12	52.5115265	-6.4619861			Q3	3	1		21/09/2013	2013														Few	Few		Common				Dominant
12	IE_SE_12C040400	CORBALLY STREAM_030	CORBALLY STREAM	RS12C040400	CORBALLY STREAM - Ballymoty Br	Wexford County Council	44.92	River Type 12	52.5115265	-6.4619861	Riffle Glide Pool	No	Q3-4	3	1		09/08/2016	2016															Single		Few				Common
12	IE_SE_12C040900	CORBALLY STREAM_040	CORBALLY STREAM	RS12C040600	Cooladine Br	Wexford County Council	5.77	River Type 12	52.4974879	-6.5036505			Q4	2			11/06/2007	2007																	Few					Few
12	IE_SE_12C040900	CORBALLY STREAM_040	CORBALLY STREAM	RS12C040600	Cooladine Br	Wexford County Council	5.77	River Type 12	52.4974879	-6.5036505			Q4	2	1		27/08/2010	2010																	Few				Common
12	IE_SE_12C040900	CORBALLY STREAM_040	CORBALLY STREAM	RS12C040600	Cooladine Br	Wexford County Council	5.77	River Type 12	52.4974879	-6.5036505			Q3-4	3	1		21/09/2013	2013															Few		Few				Numerous
12	IE_SE_12C040900	CORBALLY STREAM_040	CORBALLY STREAM	RS12C040600	Cooladine Br	Wexford County Council	5.77	River Type 12	52.4974879	-6.5036505	Riffle Glide Pool	No	Q4	2	1		09/08/2016	2016														Single			Few				Few
12	IE_SE_12C040900	CORBALLY STREAM_040	CORBALLY STREAM	RS12C040900	Br u/s Slaney R confl	Wexford County Council	5.77	River Type 12	52.5199914	-6.5338101			Q4	1			11/06/2007	2007		Few								Few							Few					Common
12	IE_SE_12C040900	CORBALLY STREAM_040	CORBALLY STREAM	RS12C040900	Br u/s Slaney R confl	Wexford County Council	5.77	River Type 12	52.5199914	-6.5338101			Q4	2	1		27/08/2010	2010														Few			Common				Common
12	IE_SE_12C040900	CORBALLY STREAM_040	CORBALLY STREAM	RS12C040900	Br u/s Slaney R confl	Wexford County Council	5.77	River Type 12	52.5199914	-6.5338101			Q4	3	1		04/08/2013	2013										Few											Numerous
12	IE_SE_12C040900	CORBALLY STREAM_040	CORBALLY STREAM	RS12C040900	Br u/s Slaney R confl	Wexford County Council	5.77	River Type 12	52.5199914	-6.5338101	Riffle Glide Pool	No	Q3-4	5	2		09/08/2016	2016											Single			Few							Common
12	IE_SE_12C060300	CARRIGOWER_010	CARRIGOWER	RS12C060300	Merginstown Br	Wicklow County Council	157.35	River Type 13	53.0265234	-6.6392755			Q3-4	2			16/05/2007	2007																	Few					Common
12	IE_SE_12C060300	CARRIGOWER_010	CARRIGOWER	RS12C060300	Merginstown Br	Wicklow County Council	157.35	River Type 13	53.0265234	-6.6392755			Q3-4	2	1		11/08/2010	2010																	Few				Excessive
12	IE_SE_12C060300	CARRIGOWER_010	CARRIGOWER	RS12C060300	Merginstown Br	Wicklow County Council	157.35	River Type 13	53.0265234	-6.6392755			Q4	4	1		09/10/2013	2013										Few					Few						Common
12	IE_SE_12C060300	CARRIGOWER_010	CARRIGOWER	RS12C060300	Merginstown Br	Wicklow County Council	157.35	River Type 13	53.0265234	-6.6392755	Riffle Glide Pool	No	Q4	3	1		27/08/2016	2016																					Numerous
12	IE_SE_12C060600	CARRIGOWER_020	CARRIGOWER	RS12C060600	Br d/s Whitestown Br	Wicklow County Council	135.09	River Type 13	52.9965491	-6.6485898			Q4	2			16/05/2007	2007																	Few					Few
12	IE_SE_12C060600	CARRIGOWER_020	CARRIGOWER	RS12C060600	Br d/s Whitestown Br	Wicklow County Council	135.09	River Type 13	52.9965491	-6.6485898			Q4	2	1		11/08/2010	2010										Few							Few				Few
12	IE_SE_12C060600	CARRIGOWER_020	CARRIGOWER	RS12C060600	Br d/s Whitestown Br	Wicklow County Council	135.09	River Type 13	52.9965491	-6.6485898			Q4	3	1		09/10/2013	2013														Few	Common						Common
12	IE_SE_12C060600	CARRIGOWER_020	CARRIGOWER	RS12C060600	Br d/s Whitestown Br	Wicklow County Council	135.09	River Type 13	52.9965491	-6.6485898	Riffle Glide Pool	No	Q4	4	2		27/08/2016	2016																					Dominant
12	IE_SE_12C070300	COOLBOY_010	COOLBOY	RS12C070200	Br SW of Greenfort	Wicklow County Council	79.53	River Type 14	52.7569138	-6.4523044			Q4	2			22/05/2007	2007										Few												Few
12	IE_SE_12C070300	COOLBOY_010	COOLBOY	RS12C070200	Br SW of Greenfort	Wicklow County Council	79.53	River Type 14	52.7569138	-6.4523044			Q3-4	3	1		18/07/2013	2013															Few		Few				Common
12	IE_SE_12C070300	COOLBOY_010	COOLBOY	RS12C070200	Br SW of Greenfort	Wicklow County Council	79.53	River Type 14	52.7569138	-6.4523044	Riffle Glide Pool	No	Q4	3	1		22/06/2016	2016															Few						Common
12	IE_SE_12C070300	COOLBOY_010	COOLBOY	RS12C070300	COOLBOY - Coolboy Br	Wicklow County Council	79.53	River Type 14	52.7635854	-6.4616184			Q3	2			20/08/2010	2010										Few							Few					Few
12	IE_SE_12C070300	COOLBOY_010	COOLBOY	RS12C070300	COOLBOY - Coolboy Br	Wicklow County Council	79.53	River Type 14	52.7635854	-6.4616184			Q3-4	3	1		18/07/2013	2013														Single	Single						Common
12	IE_SE_12C070300	COOLBOY_010	COOLBOY	RS12C070300	COOLBOY - Coolboy Br	Wicklow County Council	79.53	River Type 14	52.7635854	-6.4616184	Riffle Glide Pool	No	Q4	2	1		22/06/2016	2016										Few					Few						Few
12	IE_SE_12C070700	COOLBOY_020	COOLBOY	RS12C070700	Lattin Br	Wicklow County Council	66.32	River Type 14	52.7615655	-6.500782			Q4-5	2			22/05/2007	2007		Few
12	IE_SE_12C070700	COOLBOY_020	COOLBOY	RS12C070700	Lattin Br	Wicklow County Council	66.32	River Type 14	52.7615655	-6.500782			Q4	3	1		20/08/2010	2010										Few							Few				Few
12	IE_SE_12C070700	COOLBOY_020	COOLBOY	RS12C070700	Lattin Br	Wicklow County Council	66.32	River Type 14	52.7615655	-6.500782			Q3-4	3	1		17/07/2013	2013		Few					Few										Few				Common
12	IE_SE_12C070700	COOLBOY_020	COOLBOY	RS12C070700	Lattin Br	Wicklow County Council	66.32	River Type 14	52.7615655	-6.500782	Riffle Glide Pool	No	Q4	4	2		22/06/2016	2016									Single	Few							Single
12	IE_SE_12C070700	COOLBOY_020	COOLBOY	RS12C070700	Lattin Br	Wicklow County Council	66.32	River Type 14	52.7615655	-6.500782	Riffle Glide Pool	No	Q4-5	3	2		02/08/2018	2018		Few								Few				Few			Few				Few
12	IE_SE_12C080300	CAMOLIN STREAM_010	CAMOLIN STREAM	RS12C080300	CAMOLIN STREAM - Br u/s Bay Br	Wexford County Council	35.75	River Type 13	52.6150232	-6.4324161			Q4	1			06/06/2007	2007																	Common					Common
12	IE_SE_12C080300	CAMOLIN STREAM_010	CAMOLIN STREAM	RS12C080300	CAMOLIN STREAM - Br u/s Bay Br	Wexford County Council	35.75	River Type 13	52.6150232	-6.4324161			Q3-4	2	1		27/08/2010	2010																	Few				Few
12	IE_SE_12C080300	CAMOLIN STREAM_010	CAMOLIN STREAM	RS12C080300	CAMOLIN STREAM - Br u/s Bay Br	Wexford County Council	35.75	River Type 13	52.6150232	-6.4324161			Q3-4	4	2		03/08/2013	2013														Few	Few						Numerous
12	IE_SE_12C080300	CAMOLIN STREAM_010	CAMOLIN STREAM	RS12C080300	CAMOLIN STREAM - Br u/s Bay Br	Wexford County Council	35.75	River Type 13	52.6150232	-6.4324161	Riffle Glide Pool		Q3-4	3	1		10/08/2016	2016																	Few				Common
12	IE_SE_12C090100	CLONMORE RIVER (SLANEY)_010	CLONMORE RIVER (SLANEY)	RS12C090050	Clonmore Br	Wexford County Council	6.12	River Type 12	52.4236564	-6.6114551			Q4	2	1		08/09/2010	2010														Few			Few				Common
12	IE_SE_12C090100	CLONMORE RIVER (SLANEY)_010	CLONMORE RIVER (SLANEY)	RS12C090050	Clonmore Br	Wexford County Council	6.12	River Type 12	52.4236564	-6.6114551			Q3	3	1		21/09/2013	2013							Single							Few	Few						Numerous
12	IE_SE_12C090100	CLONMORE RIVER (SLANEY)_010	CLONMORE RIVER (SLANEY)	RS12C090050	Clonmore Br	Wexford County Council	6.12	River Type 12	52.4236564	-6.6114551	Riffle Glide Pool		Q4	4	1		11/07/2016	2016																					Numerous
12	IE_SE_12C090100	CLONMORE RIVER (SLANEY)_010	CLONMORE RIVER (SLANEY)	RS12C090100	Mackmine Br (on Side Road)	Wexford County Council	6.12	River Type 12	52.4245016	-6.5816048			Q4	1.5			03/09/2010	2010		Few					Few			Few							Few				Few
12	IE_SE_12C090100	CLONMORE RIVER (SLANEY)_010	CLONMORE RIVER (SLANEY)	RS12C090100	Mackmine Br (on Side Road)	Wexford County Council	6.12	River Type 12	52.4245016	-6.5816048			Q3-4	3	1		21/09/2013	2013							Single							Few							Numerous
12	IE_SE_12C090100	CLONMORE RIVER (SLANEY)_010	CLONMORE RIVER (SLANEY)	RS12C090100	Mackmine Br (on Side Road)	Wexford County Council	6.12	River Type 12	52.4245016	-6.5816048	Riffle Glide Pool	No	Q4-5	3	1		11/07/2016	2016															Single						Few
12	IE_SE_12C100500	CLASHAVEY RIVER_010	CLASHAVEY RIVER	RS12C100500	Clashavey Br	Carlow County Council	62.79	River Type 13	52.7079819	-6.7022395			Q3-4				19/08/2010	2010																	Few				Few
12	IE_SE_12C100500	CLASHAVEY RIVER_010	CLASHAVEY RIVER	RS12C100500	Clashavey Br	Carlow County Council	62.79	River Type 13	52.7079819	-6.7022395			Q3-4	3	1		17/09/2013	2013																	Single				Common
12	IE_SE_12C100500	CLASHAVEY RIVER_010	CLASHAVEY RIVER	RS12C100500	Clashavey Br	Carlow County Council	62.79	River Type 13	52.7079819	-6.7022395	Riffle Glide Pool	No	Q3-4	3	1		08/08/2016	2016														Single			Single				Numerous
12	IE_SE_12D010050	DERREEN_010	DERREEN	RS12D010050	Br SW of Toorboy	Wicklow County Council	212.74	River Type 14	52.9284959	-6.518384			Q5	2			17/05/2007	2007														Few			Few
12	IE_SE_12D010050	DERREEN_010	DERREEN	RS12D010050	Br SW of Toorboy	Wicklow County Council	212.74	River Type 14	52.9284959	-6.518384			Q3-4	3	1		16/08/2010	2010																	Numerous
12	IE_SE_12D010050	DERREEN_010	DERREEN	RS12D010050	Br SW of Toorboy	Wicklow County Council	212.74	River Type 14	52.9284959	-6.518384			Q4	3	1		02/08/2013	2013																	Common
12	IE_SE_12D010050	DERREEN_010	DERREEN	RS12D010050	Br SW of Toorboy	Wicklow County Council	212.74	River Type 14	52.9284959	-6.518384	Riffle Glide Pool	No	Q4	3	1		25/08/2016	2016											Single
12	IE_SE_12D010050	DERREEN_010	DERREEN	RS12D010050	Br SW of Toorboy	Wicklow County Council	212.74	River Type 14	52.9284959	-6.518384	Riffle Glide Pool	No	Q4-5	3	2		02/08/2018	2018														Few			Few
12	IE_SE_12D010150	DERREEN_030	DERREEN	RS12D010150	Br NE of Ballykilmurray Lr	Wicklow County Council	159.84	River Type 13	52.8940971	-6.5164233			Q3-4	2			17/05/2007	2007														Few			Common
12	IE_SE_12D010150	DERREEN_030	DERREEN	RS12D010150	Br NE of Ballykilmurray Lr	Wicklow County Council	159.84	River Type 13	52.8940971	-6.5164233			Q4	3	1		16/08/2010	2010																	Common
12	IE_SE_12D010150	DERREEN_030	DERREEN	RS12D010150	Br NE of Ballykilmurray Lr	Wicklow County Council	159.84	River Type 13	52.8940971	-6.5164233			Q4	3	1		01/08/2013	2013															Few		Common
12	IE_SE_12D010150	DERREEN_030	DERREEN	RS12D010150	Br NE of Ballykilmurray Lr	Wicklow County Council	159.84	River Type 13	52.8940971	-6.5164233	Riffle Glide Pool	No	Q4	3	1		25/08/2016	2016										Single					Few
12	IE_SE_12D010200	DERREEN_040	DERREEN	RS12D010200	2nd Ford u/s Hacketstown Br	Wicklow County Council	134.35	River Type 12	52.8715208	-6.5418657			Q3-4	2			14/09/2007	2007														Few	Few		Few
12	IE_SE_12D010300	DERREEN_050	DERREEN	RS12D010300	Hacketstown Br	Carlow County Council	125.2	River Type 13	52.8690874	-6.563412			Q4	2			17/05/2007	2007										Few							Few
12	IE_SE_12D010300	DERREEN_050	DERREEN	RS12D010300	Hacketstown Br	Carlow County Council	125.2	River Type 13	52.8690874	-6.563412			Q4	3	1		16/08/2010	2010													Few				Common
12	IE_SE_12D010300	DERREEN_050	DERREEN	RS12D010300	Hacketstown Br	Carlow County Council	125.2	River Type 13	52.8690874	-6.563412			Q3-4	3	1		01/08/2013	2013															Few		Common				Few
12	IE_SE_12D010300	DERREEN_050	DERREEN	RS12D010300	Hacketstown Br	Carlow County Council	125.2	River Type 13	52.8690874	-6.563412	Riffle Glide Pool	No	Q4	3	1		25/08/2016	2016										Few					Few
12	IE_SE_12D010420	DERREEN_060	DERREEN	RS12D010400	Saulsford Br	Carlow County Council	109.56	River Type 12	52.8651788	-6.5980835			Q3-4	3			14/09/2007	2007									Few					Common	Few		Few
12	IE_SE_12D010420	DERREEN_060	DERREEN	RS12D010400	Saulsford Br	Carlow County Council	109.56	River Type 12	52.8651788	-6.5980835			Q4	3	1		16/08/2010	2010										Few				Few			Few				Few
12	IE_SE_12D010420	DERREEN_060	DERREEN	RS12D010420	Br d/s Saulsford Br	Carlow County Council	109.56	River Type 12	52.8605611	-6.6081958			Q4	2			21/05/2007	2007																	Few
12	IE_SE_12D010420	DERREEN_060	DERREEN	RS12D010420	Br d/s Saulsford Br	Carlow County Council	109.56	River Type 12	52.8605611	-6.6081958			Q4	3	1		16/08/2010	2010										Few				Few			Common				Few
12	IE_SE_12D010420	DERREEN_060	DERREEN	RS12D010420	Br d/s Saulsford Br	Carlow County Council	109.56	River Type 12	52.8605611	-6.6081958			Q3-4	3	1		12/08/2013	2013																	Few				Few
12	IE_SE_12D010420	DERREEN_060	DERREEN	RS12D010420	Br d/s Saulsford Br	Carlow County Council	109.56	River Type 12	52.8605611	-6.6081958	Riffle Glide Pool	No	Q4	3	2		26/08/2016	2016														Single	Few						Common
12	IE_SE_12D010500	DERREEN_070	DERREEN	RS12D010500	DERREEN - Acaun Br	Carlow County Council	91.46	River Type 12	52.8453849	-6.6651298			Q3-4	2	1		12/08/2010	2010										Few				Few			Few				Common
12	IE_SE_12D010500	DERREEN_070	DERREEN	RS12D010500	DERREEN - Acaun Br	Carlow County Council	91.46	River Type 12	52.8453849	-6.6651298			Q4	3	1		27/07/2013	2013																					Few
12	IE_SE_12D010500	DERREEN_070	DERREEN	RS12D010500	DERREEN - Acaun Br	Carlow County Council	91.46	River Type 12	52.8453849	-6.6651298	Riffle Glide Pool	No	Q4	3	1		26/08/2016	2016										Single	Single										Numerous
12	IE_SE_12D010550	DERREEN_080	DERREEN	RS12D010550	Knockeen Br	Carlow County Council	84.69	River Type 12	52.8159107	-6.6716723			Q4	2			21/05/2007	2007
12	IE_SE_12D010550	DERREEN_080	DERREEN	RS12D010550	Knockeen Br	Carlow County Council	84.69	River Type 12	52.8159107	-6.6716723			Q3-4	3	2		13/08/2010	2010																					Few
12	IE_SE_12D010550	DERREEN_080	DERREEN	RS12D010550	Knockeen Br	Carlow County Council	84.69	River Type 12	52.8159107	-6.6716723			Q4	3	1		27/07/2013	2013															Few						Few
12	IE_SE_12D010550	DERREEN_080	DERREEN	RS12D010550	Knockeen Br	Carlow County Council	84.69	River Type 12	52.8159107	-6.6716723	Riffle Glide Pool	No	Q4	3	1		26/08/2016	2016						Single				Single					Few						Common
12	IE_SE_12D010800	DERREEN_100	DERREEN	RS12D010700	Rathglass Br	Carlow County Council	65.33	River Type 11	52.77671	-6.7094622			Q4-5	2			21/05/2007	2007														Few
12	IE_SE_12D010800	DERREEN_100	DERREEN	RS12D010700	Rathglass Br	Carlow County Council	65.33	River Type 11	52.77671	-6.7094622			Q3-4	3	1		13/08/2010	2010										Few							Few				Few
12	IE_SE_12D010800	DERREEN_100	DERREEN	RS12D010700	Rathglass Br	Carlow County Council	65.33	River Type 11	52.77671	-6.7094622			Q3-4	3	1		01/08/2013	2013															Common						Numerous
12	IE_SE_12D010800	DERREEN_100	DERREEN	RS12D010700	Rathglass Br	Carlow County Council	65.33	River Type 11	52.77671	-6.7094622	Lowland Meandering	No	Q4	3	1		26/08/2016	2016														Single	Few		Few				Few
12	IE_SE_12D020100	DERRY_010	DERRY	RS12D020100	Cross Br	Wicklow County Council	126.13	River Type 14	52.8161247	-6.4999565			Q4	2			22/05/2007	2007
12	IE_SE_12D020100	DERRY_010	DERRY	RS12D020100	Cross Br	Wicklow County Council	126.13	River Type 14	52.8161247	-6.4999565			Q3	2	2		18/08/2010	2010																	Few				Few
12	IE_SE_12D020100	DERRY_010	DERRY	RS12D020100	Cross Br	Wicklow County Council	126.13	River Type 14	52.8161247	-6.4999565			Q3-4	3	1		18/07/2013	2013									Single								Few				Dominant
12	IE_SE_12D020100	DERRY_010	DERRY	RS12D020100	Cross Br	Wicklow County Council	126.13	River Type 14	52.8161247	-6.4999565	Riffle Glide Pool	No	Q3-4	4	2		21/06/2016	2016										Few					Few						Common
12	IE_SE_12D020350	DERRY_020	DERRY	RS12D020200	DERRY - Tinahely Br	Wicklow County Council	71.51	River Type 13	52.8001875	-6.4626208			Q3-4	2	1		18/08/2010	2010																	Few
12	IE_SE_12D020350	DERRY_020	DERRY	RS12D020200	DERRY - Tinahely Br	Wicklow County Council	71.51	River Type 13	52.8001875	-6.4626208			Q3-4	3	1		18/07/2013	2013															Few						Common
12	IE_SE_12D020350	DERRY_020	DERRY	RS12D020200	DERRY - Tinahely Br	Wicklow County Council	71.51	River Type 13	52.8001875	-6.4626208	Riffle Glide Pool	No	Q4	2	1		21/06/2016	2016											Single										Few
12	IE_SE_12D020350	DERRY_020	DERRY	RS12D020350	Greenhall Br	Wicklow County Council	71.51	River Type 13	52.7779508	-6.4863021			Q4	2			22/05/2007	2007														Few			Few
12	IE_SE_12D020350	DERRY_020	DERRY	RS12D020350	Greenhall Br	Wicklow County Council	71.51	River Type 13	52.7779508	-6.4863021			Q3-4	3	1		18/08/2010	2010													Few				Few				Few
12	IE_SE_12D020350	DERRY_020	DERRY	RS12D020350	Greenhall Br	Wicklow County Council	71.51	River Type 13	52.7779508	-6.4863021			Q3-4	3	1		17/07/2013	2013																					Few
12	IE_SE_12D020350	DERRY_020	DERRY	RS12D020350	Greenhall Br	Wicklow County Council	71.51	River Type 13	52.7779508	-6.4863021	Riffle Glide Pool	No	Q3-4	4	2		22/06/2016	2016		Few								Few					Few						Few
12	IE_SE_12D020500	DERRY_030	DERRY	RS12D020500	Shillelagh Br	Wicklow County Council	60.35	River Type 13	52.7541783	-6.5319294			Q4	2			22/05/2007	2007		Few
12	IE_SE_12D020500	DERRY_030	DERRY	RS12D020500	Shillelagh Br	Wicklow County Council	60.35	River Type 13	52.7541783	-6.5319294			Q4	2	1		20/08/2010	2010										Few							Common				Common
12	IE_SE_12D020500	DERRY_030	DERRY	RS12D020500	Shillelagh Br	Wicklow County Council	60.35	River Type 13	52.7541783	-6.5319294			Q3-4	3	1		17/07/2013	2013																					Few
12	IE_SE_12D020500	DERRY_030	DERRY	RS12D020500	Shillelagh Br	Wicklow County Council	60.35	River Type 13	52.7541783	-6.5319294	Riffle Glide Pool		Q3-4	4	2		22/06/2016	2016														Single	Few		Single				Few
12	IE_SE_12D020700	DERRY_040	DERRY	RS12D020700	Balisland Br	Wicklow County Council	51.14	River Type 13	52.7231235	-6.5530748			Q4	1			24/05/2007	2007																	Few					Few
12	IE_SE_12D020700	DERRY_040	DERRY	RS12D020700	Balisland Br	Wicklow County Council	51.14	River Type 13	52.7231235	-6.5530748			Q3-4	2			20/08/2010	2010																	Common				Few
12	IE_SE_12D020700	DERRY_040	DERRY	RS12D020700	Balisland Br	Wicklow County Council	51.14	River Type 13	52.7231235	-6.5530748			Q3-4	3	1		17/07/2013	2013									Single								Few
12	IE_SE_12D020700	DERRY_040	DERRY	RS12D020700	Balisland Br	Wicklow County Council	51.14	River Type 13	52.7231235	-6.5530748	Lowland Meandering	No	Q3-4	4	2		20/06/2016	2016							Single							Few	Few		Single				Dominant
12	IE_SE_12D020800	DERRY_050	DERRY	RS12D020800	DERRY - Ford N of Garryhasten	Wicklow County Council	44.27	River Type 13	52.708487	-6.6203931			Q4	3			23/08/2010	2010																	Common				Few
12	IE_SE_12D020800	DERRY_050	DERRY	RS12D020800	DERRY - Ford N of Garryhasten	Wicklow County Council	44.27	River Type 13	52.708487	-6.6203931			Q3-4	3	1		17/07/2013	2013							Common							Few			Few				Numerous
12	IE_SE_12D020800	DERRY_050	DERRY	RS12D020800	DERRY - Ford N of Garryhasten	Wicklow County Council	44.27	River Type 13	52.708487	-6.6203931	Lowland Meandering	No	Q4	4	2		20/06/2016	2016											Few			Few	Few		Single				Common
12	IE_SE_12D020910	DERRY_060	DERRY	RS12D020900	Clonegall Br	Wexford County Council	41.23	River Type 12	52.6918432	-6.6434166			Q4	2			30/05/2007	2007							Few			Few							Few					Few
12	IE_SE_12D020910	DERRY_060	DERRY	RS12D020900	Clonegall Br	Wexford County Council	41.23	River Type 12	52.6918432	-6.6434166			Q3-4	3	1		17/07/2013	2013		Few					Common			Few					Few		Few				Common
12	IE_SE_12D020910	DERRY_060	DERRY	RS12D020900	Clonegall Br	Wexford County Council	41.23	River Type 12	52.6918432	-6.6434166	Riffle Glide Pool	No	Q4	3	1		20/06/2016	2016							Single							Few	Few						Few
12	IE_SE_12D030200	DOUGLAS (BALLON)_010	DOUGLAS (BALLON)	RS12D030100	Myshall Br	Carlow County Council	82.02	River Type 12	52.6922848	-6.7845742			Q3-4	1			23/05/2007	2007		Few					Few							Few								Few
12	IE_SE_12D030200	DOUGLAS (BALLON)_010	DOUGLAS (BALLON)	RS12D030100	Myshall Br	Carlow County Council	82.02	River Type 12	52.6922848	-6.7845742			Q4	2			19/08/2010	2010		Few					Few			Few											Common
12	IE_SE_12D030200	DOUGLAS (BALLON)_010	DOUGLAS (BALLON)	RS12D030100	Myshall Br	Carlow County Council	82.02	River Type 12	52.6922848	-6.7845742			Q3	3	1		01/08/2013	2013										Single				Numerous	Single		Few				Numerous
12	IE_SE_12D030200	DOUGLAS (BALLON)_010	DOUGLAS (BALLON)	RS12D030100	Myshall Br	Carlow County Council	82.02	River Type 12	52.6922848	-6.7845742	Riffle Glide Pool	No	Q3	3	1		08/08/2016	2016							Single							Single	Few						Numerous
12	IE_SE_12D030200	DOUGLAS (BALLON)_010	DOUGLAS (BALLON)	RS12D030200	Sragh Br	Carlow County Council	82.02	River Type 12	52.7205929	-6.7504857			Q4	1			23/05/2007	2007										Few												Few
12	IE_SE_12D030200	DOUGLAS (BALLON)_010	DOUGLAS (BALLON)	RS12D030200	Sragh Br	Carlow County Council	82.02	River Type 12	52.7205929	-6.7504857			Q3-4	2			19/08/2010	2010		Few															Few				Dominant
12	IE_SE_12D030200	DOUGLAS (BALLON)_010	DOUGLAS (BALLON)	RS12D030200	Sragh Br	Carlow County Council	82.02	River Type 12	52.7205929	-6.7504857			Q3	3	1		01/08/2013	2013										Few				Common	Few						Numerous
12	IE_SE_12D030200	DOUGLAS (BALLON)_010	DOUGLAS (BALLON)	RS12D030200	Sragh Br	Carlow County Council	82.02	River Type 12	52.7205929	-6.7504857	Riffle Glide Pool	No	Q3-4	3	1		08/08/2016	2016														Few							Dominant
12	IE_SE_12D030400	DOUGLAS (BALLON)_020	DOUGLAS (BALLON)	RS12D030400	Castlegrace Br	Carlow County Council	63.5	River Type 11	52.7577469	-6.744711			Q3-4	2			23/05/2007	2007		Few																				Excessive
12	IE_SE_12D030400	DOUGLAS (BALLON)_020	DOUGLAS (BALLON)	RS12D030400	Castlegrace Br	Carlow County Council	63.5	River Type 11	52.7577469	-6.744711			Q3-4	2			17/08/2010	2010							Few							Few			Few				Numerous
12	IE_SE_12D030400	DOUGLAS (BALLON)_020	DOUGLAS (BALLON)	RS12D030400	Castlegrace Br	Carlow County Council	63.5	River Type 11	52.7577469	-6.744711			Q3	4	1		08/10/2013	2013							Common			Few					Few						Dominant
12	IE_SE_12D030400	DOUGLAS (BALLON)_020	DOUGLAS (BALLON)	RS12D030400	Castlegrace Br	Carlow County Council	63.5	River Type 11	52.7577469	-6.744711	Riffle Glide Pool	No	Q3-4	3	1		26/08/2016	2016		Single												Few							Dominant
12	IE_SE_12D040300	DOUGLAS (KILTEGAN)_010	DOUGLAS (KILTEGAN)	RS12D040300	Highpark Br	Wicklow County Council	145.23	River Type 14	52.9002845	-6.570049			Q3-4	2			21/05/2007	2007
12	IE_SE_12D040300	DOUGLAS (KILTEGAN)_010	DOUGLAS (KILTEGAN)	RS12D040300	Highpark Br	Wicklow County Council	145.23	River Type 14	52.9002845	-6.570049			Q3-4	3	1		01/08/2013	2013																					Few
12	IE_SE_12D040300	DOUGLAS (KILTEGAN)_010	DOUGLAS (KILTEGAN)	RS12D040300	Highpark Br	Wicklow County Council	145.23	River Type 14	52.9002845	-6.570049	Riffle Glide Pool	No	Q3-4	3	1		26/08/2016	2016															Few						Common
12	IE_SE_12D040700	DOUGLAS (KILTEGAN)_020	DOUGLAS (KILTEGAN)	RS12D040400	DOUGLAS (KILTEGAN) - Br d/s High Park Br. (Main Flow)	Wicklow County Council	105.42	River Type 12	52.8971329	-6.5845826			Q3	2			17/08/2010	2010										Few							Few
12	IE_SE_12D040700	DOUGLAS (KILTEGAN)_020	DOUGLAS (KILTEGAN)	RS12D040400	DOUGLAS (KILTEGAN) - Br d/s High Park Br. (Main Flow)	Wicklow County Council	105.42	River Type 12	52.8971329	-6.5845826			Q3				01/08/2013	2013														Few			Few
12	IE_SE_12D040700	DOUGLAS (KILTEGAN)_020	DOUGLAS (KILTEGAN)	RS12D040400	DOUGLAS (KILTEGAN) - Br d/s High Park Br. (Main Flow)	Wicklow County Council	105.42	River Type 12	52.8971329	-6.5845826	Riffle Glide Pool	No	Q3-4	3	1		26/08/2016	2016										Few				Few	Few						Few
12	IE_SE_12D040700	DOUGLAS (KILTEGAN)_020	DOUGLAS (KILTEGAN)	RS12D040700	Lucas Br	Wicklow County Council	105.42	River Type 12	52.8775588	-6.6221284			Q4	2			21/05/2007	2007														Few								Few
12	IE_SE_12D040700	DOUGLAS (KILTEGAN)_020	DOUGLAS (KILTEGAN)	RS12D040700	Lucas Br	Wicklow County Council	105.42	River Type 12	52.8775588	-6.6221284			Q3-4	2	1		17/08/2010	2010										Few											Common
12	IE_SE_12D040700	DOUGLAS (KILTEGAN)_020	DOUGLAS (KILTEGAN)	RS12D040700	Lucas Br	Wicklow County Council	105.42	River Type 12	52.8775588	-6.6221284			Q3-4	3	1		01/08/2013	2013														Single	Few		Few				Common
12	IE_SE_12D040700	DOUGLAS (KILTEGAN)_020	DOUGLAS (KILTEGAN)	RS12D040700	Lucas Br	Wicklow County Council	105.42	River Type 12	52.8775588	-6.6221284	Riffle Glide Pool	No	Q4	3	1		26/08/2016	2016																	Single				Few
12	IE_SE_12G010200	GLASHA (SLANEY)_010	GLASHA (SLANEY)	RS12G010100	Br S of Gorteen	Wexford County Council	24.48	River Type 13	52.5920082	-6.6755593			Q4	2			07/06/2007	2007										Few							Few
12	IE_SE_12G010200	GLASHA (SLANEY)_010	GLASHA (SLANEY)	RS12G010100	Br S of Gorteen	Wexford County Council	24.48	River Type 13	52.5920082	-6.6755593			Q4-5	2	1		24/08/2010	2010										Few
12	IE_SE_12G010200	GLASHA (SLANEY)_010	GLASHA (SLANEY)	RS12G010100	Br S of Gorteen	Wexford County Council	24.48	River Type 13	52.5920082	-6.6755593			Q3-4	3	2		16/07/2013	2013																					Common
12	IE_SE_12G010200	GLASHA (SLANEY)_010	GLASHA (SLANEY)	RS12G010100	Br S of Gorteen	Wexford County Council	24.48	River Type 13	52.5920082	-6.6755593	Riffle Glide Pool	No	Q3-4	3	2		10/07/2016	2016																					Few
12	IE_SE_12G010200	GLASHA (SLANEY)_010	GLASHA (SLANEY)	RS12G010200	Coolattin Br	Wexford County Council	24.48	River Type 13	52.6167125	-6.6072306			Q4	2			07/06/2007	2007																	Few
12	IE_SE_12G010200	GLASHA (SLANEY)_010	GLASHA (SLANEY)	RS12G010200	Coolattin Br	Wexford County Council	24.48	River Type 13	52.6167125	-6.6072306			Q4	2	1		24/08/2010	2010																					Few
12	IE_SE_12G010200	GLASHA (SLANEY)_010	GLASHA (SLANEY)	RS12G010200	Coolattin Br	Wexford County Council	24.48	River Type 13	52.6167125	-6.6072306			Q4-5	4	1		18/07/2013	2013																	Few				Few
12	IE_SE_12G010200	GLASHA (SLANEY)_010	GLASHA (SLANEY)	RS12G010200	Coolattin Br	Wexford County Council	24.48	River Type 13	52.6167125	-6.6072306	Riffle Glide Pool	No	Q4	4	2		09/08/2016	2016										Single	Single										Common
12	IE_SE_12K010250	KNICKEEN_010	KNICKEEN	RS12K010100	KNICKEEN - Br NE of Golier	Wicklow County Council	215.87	River Type 14	53.0026079	-6.5240909			Q4	3	2		16/08/2010	2010													Few				Few
12	IE_SE_12K010250	KNICKEEN_010	KNICKEEN	RS12K010100	KNICKEEN - Br NE of Golier	Wicklow County Council	215.87	River Type 14	53.0026079	-6.5240909			Q4	5	1		02/08/2013	2013																	Few
12	IE_SE_12K010250	KNICKEEN_010	KNICKEEN	RS12K010100	KNICKEEN - Br NE of Golier	Wicklow County Council	215.87	River Type 14	53.0026079	-6.5240909	Cascade Step Pool (CSP)	No	Q4-5	4	2		21/06/2016	2016																	Single
12	IE_SE_12K010250	KNICKEEN_010	KNICKEEN	RS12K010250	Br NW of Ballyvoghan	Wicklow County Council	215.87	River Type 14	52.9954303	-6.5304052			Q4-5	2			16/05/2007	2007																	Common
12	IE_SE_12K010250	KNICKEEN_010	KNICKEEN	RS12K010250	Br NW of Ballyvoghan	Wicklow County Council	215.87	River Type 14	52.9954303	-6.5304052			Q4-5	2	1		16/08/2010	2010										Few							Common				Few
12	IE_SE_12K010250	KNICKEEN_010	KNICKEEN	RS12K010250	Br NW of Ballyvoghan	Wicklow County Council	215.87	River Type 14	52.9954303	-6.5304052			Q4	3	1		02/08/2013	2013																	Common				Common
12	IE_SE_12K010250	KNICKEEN_010	KNICKEEN	RS12K010250	Br NW of Ballyvoghan	Wicklow County Council	215.87	River Type 14	52.9954303	-6.5304052	Riffle Glide Pool		Q4-5	4	2		21/06/2016	2016										Few							Single				Single
12	IE_SE_12K030400	KILLEEN STREAM (BORO)_010	KILLEEN STREAM (BORO)	RS12K030200	KILLEEN STREAM (BORO) - Milltown Br	Wexford County Council	57.29	River Type 13	52.5139347	-6.7555657			Q4	2	1		03/09/2010	2010																	Few				Few
12	IE_SE_12K030400	KILLEEN STREAM (BORO)_010	KILLEEN STREAM (BORO)	RS12K030400	Garraun Br	Wexford County Council	57.29	River Type 13	52.4854393	-6.7224068			Q4	2			12/06/2007	2007										Few							Few					Few
12	IE_SE_12K030400	KILLEEN STREAM (BORO)_010	KILLEEN STREAM (BORO)	RS12K030400	Garraun Br	Wexford County Council	57.29	River Type 13	52.4854393	-6.7224068			Q4	2.5	1		03/09/2010	2010																					Few
12	IE_SE_12K030400	KILLEEN STREAM (BORO)_010	KILLEEN STREAM (BORO)	RS12K030400	Garraun Br	Wexford County Council	57.29	River Type 13	52.4854393	-6.7224068			Q4	3	1		16/07/2013	2013																					Few
12	IE_SE_12K030400	KILLEEN STREAM (BORO)_010	KILLEEN STREAM (BORO)	RS12K030400	Garraun Br	Wexford County Council	57.29	River Type 13	52.4854393	-6.7224068	Riffle Glide Pool	No	Q4	3	1		11/07/2016	2016										Few					Few						Few
12	IE_SE_12K040800	KILDAVIN STREAM_010	KILDAVIN STREAM	RS12K040700	Br on N80 at Kildavin (u/s WWTP)	Carlow County Council	40.99	River Type 13	52.6820401	-6.6858192			Q3	2	1		23/08/2010	2010																	Few				Few
12	IE_SE_12K040800	KILDAVIN STREAM_010	KILDAVIN STREAM	RS12K040700	Br on N80 at Kildavin (u/s WWTP)	Carlow County Council	40.99	River Type 13	52.6820401	-6.6858192			Q3-4	3	1		17/07/2013	2013		Single											Few		Few						Few
12	IE_SE_12K040800	KILDAVIN STREAM_010	KILDAVIN STREAM	RS12K040700	Br on N80 at Kildavin (u/s WWTP)	Carlow County Council	40.99	River Type 13	52.6820401	-6.6858192	Riffle Glide Pool		Q3-4	2	1		08/08/2016	2016										Single					Few		Few				Few
12	IE_SE_12K040800	KILDAVIN STREAM_010	KILDAVIN STREAM	RS12K040800	Br NE of Ballypierce (on quarry road)	Carlow County Council	40.99	River Type 13	52.6744349	-6.682386			Q3-4	2	1		23/08/2010	2010										Few							Few
12	IE_SE_12K040800	KILDAVIN STREAM_010	KILDAVIN STREAM	RS12K040800	Br NE of Ballypierce (on quarry road)	Carlow County Council	40.99	River Type 13	52.6744349	-6.682386			Q3-4	3	1		17/07/2013	2013										Few							Few				Few
12	IE_SE_12K040800	KILDAVIN STREAM_010	KILDAVIN STREAM	RS12K040800	Br NE of Ballypierce (on quarry road)	Carlow County Council	40.99	River Type 13	52.6744349	-6.682386	Riffle Glide Pool	No	Q3-4	3	1		08/08/2016	2016																	Common
12	IE_SE_12L010080	LASK_010	LASK	RS12L010080	Br NW of Craan	Wexford County Council	88.81	River Type 13	52.7005352	-6.4035221			Q4	2			06/06/2007	2007										Few				Few		Common						Few
12	IE_SE_12L010080	LASK_010	LASK	RS12L010080	Br NW of Craan	Wexford County Council	88.81	River Type 13	52.7005352	-6.4035221			Q4	2	1		26/08/2010	2010																Few					Few
12	IE_SE_12L010080	LASK_010	LASK	RS12L010080	Br NW of Craan	Wexford County Council	88.81	River Type 13	52.7005352	-6.4035221			Q3-4	3	1		03/08/2013	2013														Few							Numerous
12	IE_SE_12L010080	LASK_010	LASK	RS12L010080	Br NW of Craan	Wexford County Council	88.81	River Type 13	52.7005352	-6.4035221	Riffle Glide Pool	No	Q3-4	3	1		25/08/2016	2016															Few						Few
12	IE_SE_12L010200	LASK_020	LASK	RS12L010200	2nd Br u/s Bann R confl (Ballinco	Wexford County Council	63.69	River Type 12	52.67615	-6.3744281			Q4	2			06/06/2007	2007																Few	Common					Few
12	IE_SE_12L010200	LASK_020	LASK	RS12L010200	2nd Br u/s Bann R confl (Ballinco	Wexford County Council	63.69	River Type 12	52.67615	-6.3744281			Q3-4	2	1		26/08/2010	2010										Few							Few				Few
12	IE_SE_12L010200	LASK_020	LASK	RS12L010200	2nd Br u/s Bann R confl (Ballinco	Wexford County Council	63.69	River Type 12	52.67615	-6.3744281			Q3	3	1		03/08/2013	2013										Few				Common			Few				Numerous
12	IE_SE_12L010200	LASK_020	LASK	RS12L010200	2nd Br u/s Bann R confl (Ballinco	Wexford County Council	63.69	River Type 12	52.67615	-6.3744281	Riffle Glide Pool		Q3-4	3	1		25/08/2016	2016										Few					Few						Common
12	IE_SE_12L020400	LITTLE SLANEY_010	LITTLE SLANEY	RS12L020100	Ford S of Coan	Wicklow County Council	165.22	River Type 14	52.9676298	-6.534537			Q5	2			16/05/2007	2007																	Few
12	IE_SE_12L020400	LITTLE SLANEY_010	LITTLE SLANEY	RS12L020100	Ford S of Coan	Wicklow County Council	165.22	River Type 14	52.9676298	-6.534537			Q4	3	2		12/08/2010	2010										Few							Common				Few
12	IE_SE_12L020400	LITTLE SLANEY_010	LITTLE SLANEY	RS12L020100	Ford S of Coan	Wicklow County Council	165.22	River Type 14	52.9676298	-6.534537			Q4	3	1		02/08/2013	2013															Single		Few
12	IE_SE_12L020400	LITTLE SLANEY_010	LITTLE SLANEY	RS12L020100	Ford S of Coan	Wicklow County Council	165.22	River Type 14	52.9676298	-6.534537	Cascade Step Pool (CSP)		Q4	4	2		27/08/2016	2016										Single											Few
12	IE_SE_12L020400	LITTLE SLANEY_010	LITTLE SLANEY	RS12L020300	LITTLE SLANEY - Rostyduff Br	Wicklow County Council	165.22	River Type 14	52.974575	-6.5743784			Q3-4	3	2		12/08/2010	2010										Few							Common				Few
12	IE_SE_12L020400	LITTLE SLANEY_010	LITTLE SLANEY	RS12L020300	LITTLE SLANEY - Rostyduff Br	Wicklow County Council	165.22	River Type 14	52.974575	-6.5743784			Q3-4	3	1		02/08/2013	2013															Few						Few
12	IE_SE_12L020400	LITTLE SLANEY_010	LITTLE SLANEY	RS12L020300	LITTLE SLANEY - Rostyduff Br	Wicklow County Council	165.22	River Type 14	52.974575	-6.5743784	Riffle Glide Pool	No	Q4	3	1		27/08/2016	2016																					Few
12	IE_SE_12L020400	LITTLE SLANEY_010	LITTLE SLANEY	RS12L020400	Ford d/s Rostyduff Br	Wicklow County Council	165.22	River Type 14	52.973514	-6.5866555			Q5	2			16/05/2007	2007
12	IE_SE_12L020400	LITTLE SLANEY_010	LITTLE SLANEY	RS12L020400	Ford d/s Rostyduff Br	Wicklow County Council	165.22	River Type 14	52.973514	-6.5866555			Q4	3			12/08/2010	2010																	Common				Few
12	IE_SE_12L020400	LITTLE SLANEY_010	LITTLE SLANEY	RS12L020400	Ford d/s Rostyduff Br	Wicklow County Council	165.22	River Type 14	52.973514	-6.5866555			Q4	3	1		02/08/2013	2013															Few		Few				Common
12	IE_SE_12L020400	LITTLE SLANEY_010	LITTLE SLANEY	RS12L020400	Ford d/s Rostyduff Br	Wicklow County Council	165.22	River Type 14	52.973514	-6.5866555	Riffle Glide Pool	No	Q4	4	2		27/08/2016	2016																					Few
12	IE_SE_12M010200	MINE_010	MINE	RS12M010200	Money Br	Wexford County Council	81.91	River Type 14	52.685006	-6.4746535			Q4	2			24/05/2007	2007																	Few					Single
12	IE_SE_12M010200	MINE_010	MINE	RS12M010200	Money Br	Wexford County Council	81.91	River Type 14	52.685006	-6.4746535			Q3-4	2	1		23/08/2010	2010																	Few				Few
12	IE_SE_12M010200	MINE_010	MINE	RS12M010200	Money Br	Wexford County Council	81.91	River Type 14	52.685006	-6.4746535			Q3-4	4	2		18/07/2013	2013																					Numerous
12	IE_SE_12M010200	MINE_010	MINE	RS12M010200	Money Br	Wexford County Council	81.91	River Type 14	52.685006	-6.4746535	Riffle Glide Pool	No	Q3-4	3	1		25/08/2016	2016														Few	Few		Common				Common
12	IE_SE_12M010600	MINE_020	MINE	RS12M010400	Tombreen Bridge	Wicklow County Council	50.46	River Type 12	52.7014851	-6.5165935			Q4	2	1		20/08/2010	2010																	Common				Few
12	IE_SE_12M010600	MINE_020	MINE	RS12M010400	Tombreen Bridge	Wicklow County Council	50.46	River Type 12	52.7014851	-6.5165935			Q4	3	1		18/07/2013	2013													Single				Few				Numerous
12	IE_SE_12M010600	MINE_020	MINE	RS12M010400	Tombreen Bridge	Wicklow County Council	50.46	River Type 12	52.7014851	-6.5165935	Riffle Glide Pool	No	Q4	5	2		25/08/2016	2016
12	IE_SE_12M010600	MINE_020	MINE	RS12M010600	Ballingate Br	Wicklow County Council	50.46	River Type 12	52.7181423	-6.551886			Q4	2			16/05/2007	2007		Few															Few					Few
12	IE_SE_12M010600	MINE_020	MINE	RS12M010600	Ballingate Br	Wicklow County Council	50.46	River Type 12	52.7181423	-6.551886			Q3-4	2	1		20/08/2010	2010					Few											Few	Common				Common
12	IE_SE_12M010600	MINE_020	MINE	RS12M010600	Ballingate Br	Wicklow County Council	50.46	River Type 12	52.7181423	-6.551886			Q3	3	1		17/07/2013	2013		Single												Few	Few		Few				Common
12	IE_SE_12M010600	MINE_020	MINE	RS12M010600	Ballingate Br	Wicklow County Council	50.46	River Type 12	52.7181423	-6.551886	Lowland Meandering	No	Q4	3	1		22/06/2016	2016															Few						Common
12	IE_SE_12R010200	ROSNASTRAW STREAM_010	ROSNASTRAW STREAM	RS12R010200	ROSNASTRAW STREAM - Br u/s Rosnastraw Br	Wexford County Council	89.81	River Type 13	52.7779036	-6.4279946			Q3-4	2	1		18/08/2010	2010																	Few				Few
12	IE_SE_12R010200	ROSNASTRAW STREAM_010	ROSNASTRAW STREAM	RS12R010200	ROSNASTRAW STREAM - Br u/s Rosnastraw Br	Wexford County Council	89.81	River Type 13	52.7779036	-6.4279946			Q3-4	3	1		18/07/2013	2013		Single								Few					Few						Few
12	IE_SE_12R010200	ROSNASTRAW STREAM_010	ROSNASTRAW STREAM	RS12R010200	ROSNASTRAW STREAM - Br u/s Rosnastraw Br	Wexford County Council	89.81	River Type 13	52.7779036	-6.4279946	Riffle Glide Pool	No	Q3-4	4	2		22/06/2016	2016							Few							Single	Few						Common
12	IE_SE_12R010400	ROSNASTRAW STREAM_020	ROSNASTRAW STREAM	RS12R010300	Rosnastraw Br	Wicklow County Council	78.18	River Type 12	52.7802294	-6.4377153			Q4	2			22/05/2007	2007										Few							Few					Few
12	IE_SE_12R010400	ROSNASTRAW STREAM_020	ROSNASTRAW STREAM	RS12R010300	Rosnastraw Br	Wicklow County Council	78.18	River Type 12	52.7802294	-6.4377153			Q3-4	3	1		18/07/2013	2013										Few				Single							Common
12	IE_SE_12R010400	ROSNASTRAW STREAM_020	ROSNASTRAW STREAM	RS12R010300	Rosnastraw Br	Wicklow County Council	78.18	River Type 12	52.7802294	-6.4377153	Riffle Glide Pool	No	Q3-4	4	2		22/06/2016	2016										Few					Few		Single				Common
12	IE_SE_12R010400	ROSNASTRAW STREAM_020	ROSNASTRAW STREAM	RS12R010400	ROSNASTRAW STREAM - Kilcommon Br	Wicklow County Council	78.18	River Type 12	52.78932	-6.4563567			Q3-4	2	1		18/08/2010	2010										Few				Few			Common				Common
[truncated: 9,113 more rows]
[truncated: 233 more columns]
